# Supplementary material for: Photoredox/copper-catalyzed gem-difluoroalkylation-cyanation of 1,3-enynes
Source: Royal Society of Chemistry journal article supplement (doi:10.1039/d4ob00602j), 2024-01-01

# Supporting Information

## Photoredox /Copper-Catalyzed *gem*-Difluoroalkylation-Cyanation of 1,3-Enynes

Yachen Wang,<sup>a</sup> Shuai Liu<sup>b</sup> and Yangen Huang <sup>\*,a</sup>

<sup>a</sup> *College of Chemistry and Chemical Engineering, Donghua University, 2999 North Renmin Lu, Shanghai 201620, China. E-mail: hyg@dhu.edu.cn.*

<sup>b</sup> *National Engineering Research Center for Carbohydrate Synthesis, Jiangxi Normal University, Nanchang, 330022, China. E-mail: shuailiu@jxnu.edu.cn.*

## Contents

|                                                                                                     |    |
|-----------------------------------------------------------------------------------------------------|----|
| 1. General Information.....                                                                         | 3  |
| 2. Preparation of Substrates and Reagents.....                                                      | 3  |
| 3. Optimization of reaction conditions.....                                                         | 4  |
| 4. Photoredox/copper-Catalyzed Difluoroalkylation of 1,3-enyne.....                                 | 7  |
| 5. Transformation of difluoroalkylated allenes.....                                                 | 32 |
| 6. Mechanistic Studies.....                                                                         | 35 |
| 7. References.....                                                                                  | 37 |
| 8. Copies of $^1\text{H}$ , $^{19}\text{F}$ , and $^{13}\text{C}$ NMR Spectra for the Products..... | 38 |

## 1. General Information

$^1\text{H}$  NMR (TMS as the internal standard),  $^{13}\text{C}$  NMR and  $^{19}\text{F}$  NMR spectra were recorded on a Bruker AM400 spectrometer. The following abbreviations were used to explain the multiplicities: s = singlet, d = doublet, t = triplet, q = quartet, m = multiplet. The NMR yield was determined by  $^{19}\text{F}$  NMR using trifluorotoluene as an internal standard. IR spectra were recorded on a Thermo Scientific Nicolet iS10 Fourier transform infrared (FT-IR) spectrometer and were reported in terms of wavenumber of absorption ( $\text{cm}^{-1}$ ). Detection of melting point was conducted on the SGW X-4 microscopic melting point meter. HRMS-ESI data was collected by Thermo Fisher Scientific Q Exactive HF Orbitrap-FTMS. LED lights were commercial from Kessil® (KSA 160WE-TB, 40W). Unless otherwise stated, all reactions were carried out under strictly anhydrous conditions and  $\text{N}_2$  atmosphere. Unless otherwise noted, all reagents were used as received from commercial sources.

## 2. Preparation of Substrates and Reagents

Substrates **1a**<sup>1</sup>, **1b**<sup>1</sup>, **1c**<sup>2</sup>, **1d**<sup>3</sup>, **1e**<sup>4</sup>, **1f**<sup>5</sup>, **1g**<sup>3</sup>, **1h**<sup>2</sup>, **1i**<sup>1</sup>, **1j**<sup>1</sup>, **1k**<sup>6</sup>, **1l**<sup>5</sup>, **1m**<sup>3</sup>, **1n**<sup>7</sup>, **1o**<sup>8</sup>, **1p**<sup>9</sup>, **1q**<sup>5</sup>, **1r**<sup>6</sup>, **1s**<sup>10</sup>, **1t**<sup>1</sup>, **1u**<sup>1</sup>, **1v**<sup>11</sup>, **1w**<sup>1</sup>, **1x**<sup>1</sup>, **1y**<sup>7</sup> were prepared according to the reported literatures.

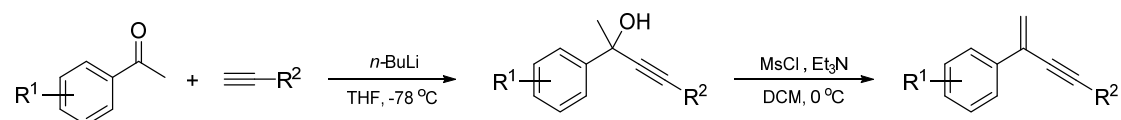

Reagents **2e**<sup>12</sup>, **2b**<sup>13</sup> were prepared according to the reported literatures.

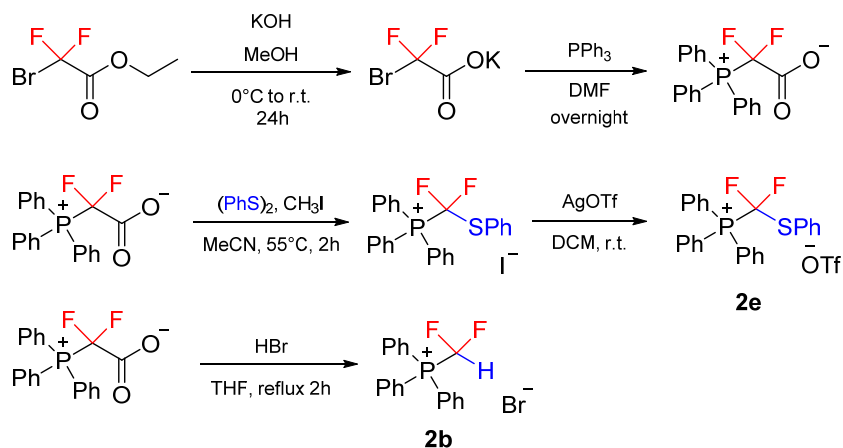

### 3. Optimization of reaction conditions

Table 1. Optimization of reaction conditions<sup>[a]</sup>.

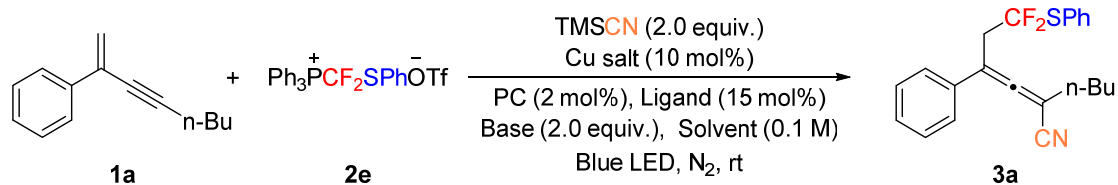

| Entry | 1a  | 2e  | photocatalyst                    | Ligand | Cu salt                                            | Solvent | Base                                              | Time | Yield (%) <sup>[b]</sup> |
|-------|-----|-----|----------------------------------|--------|----------------------------------------------------|---------|---------------------------------------------------|------|--------------------------|
| 1     | 1   | 1.5 | <i>fac</i> -Ir(ppy) <sub>3</sub> | dtbbpy | Cu(MeCN) <sub>4</sub> PF <sub>6</sub>              | MeCN    | K <sub>2</sub> CO <sub>3</sub>                    | 6 h  | 51                       |
| 2     | 1.5 | 1   | <i>fac</i> -Ir(ppy) <sub>3</sub> | dtbbpy | Cu(MeCN) <sub>4</sub> PF <sub>6</sub>              | MeCN    | K <sub>2</sub> CO <sub>3</sub>                    | 6 h  | 70                       |
| 3     | 1   | 2   | <i>fac</i> -Ir(ppy) <sub>3</sub> | dtbbpy | Cu(MeCN) <sub>4</sub> PF <sub>6</sub>              | MeCN    | K <sub>2</sub> CO <sub>3</sub>                    | 6 h  | 65                       |
| 4     | 2   | 1   | <i>fac</i> -Ir(ppy) <sub>3</sub> | dtbbpy | Cu(MeCN) <sub>4</sub> PF <sub>6</sub>              | MeCN    | K <sub>2</sub> CO <sub>3</sub>                    | 6 h  | 74                       |
| 5     | 1.5 | 1   | <i>fac</i> -Ir(ppy) <sub>3</sub> | dtbbpy | (CF <sub>3</sub> SO <sub>2</sub> ) <sub>2</sub> Cu | MeCN    | K <sub>2</sub> CO <sub>3</sub>                    | 6 h  | 32                       |
| 6     | 1.5 | 1   | <i>fac</i> -Ir(ppy) <sub>3</sub> | dtbbpy | Cu(OAc) <sub>2</sub>                               | MeCN    | K <sub>2</sub> CO <sub>3</sub>                    | 6 h  | 29                       |
| 7     | 1.5 | 1   | <i>fac</i> -Ir(ppy) <sub>3</sub> | dtbbpy | CuI                                                | MeCN    | K <sub>2</sub> CO <sub>3</sub>                    | 6 h  | <5                       |
| 8     | 1.5 | 1   | <i>fac</i> -Ir(ppy) <sub>3</sub> | dtbbpy | CuCl                                               | MeCN    | K <sub>2</sub> CO <sub>3</sub>                    | 6 h  | 39                       |
| 9     | 1.5 | 1   | <i>fac</i> -Ir(ppy) <sub>3</sub> | dtbbpy | Cu(MeCN) <sub>4</sub> BF <sub>4</sub>              | MeCN    | K <sub>2</sub> CO <sub>3</sub>                    | 6 h  | 83                       |
| 10    | 1.5 | 1   | <i>fac</i> -Ir(ppy) <sub>3</sub> | dtbbpy | Cu(MeCN) <sub>4</sub> BF <sub>4</sub>              | MeCN    | K <sub>3</sub> PO <sub>4</sub> ·3H <sub>2</sub> O | 6 h  | 39                       |
| 11    | 1.5 | 1   | <i>fac</i> -Ir(ppy) <sub>3</sub> | dtbbpy | Cu(MeCN) <sub>4</sub> BF <sub>4</sub>              | MeCN    | MeONa                                             | 6 h  | 32                       |
| 12    | 1.5 | 1   | <i>fac</i> -Ir(ppy) <sub>3</sub> | dtbbpy | Cu(MeCN) <sub>4</sub> BF <sub>4</sub>              | MeCN    | CsF                                               | 6 h  | 53                       |
| 13    | 1.5 | 1   | <i>fac</i> -Ir(ppy) <sub>3</sub> | dtbbpy | Cu(MeCN) <sub>4</sub> BF <sub>4</sub>              | MeCN    | CH <sub>3</sub> CO <sub>2</sub> Na                | 6 h  | 90, 88 <sup>[c]</sup>    |
| 14    | 1.5 | 1   | <i>fac</i> -Ir(ppy) <sub>3</sub> | dtbbpy | Cu(MeCN) <sub>4</sub> PF <sub>6</sub>              | MeCN    | CH <sub>3</sub> CO <sub>2</sub> Na                | 6 h  | 77                       |
| 15    | 1.5 | 1   | <i>fac</i> -Ir(ppy) <sub>3</sub> | dtbbpy | Cu(OAc) <sub>2</sub>                               | MeCN    | CH <sub>3</sub> CO <sub>2</sub> Na                | 6 h  | 39                       |
| 16    | 1.5 | 1   | <i>fac</i> -Ir(ppy) <sub>3</sub> | dtbbpy | CuCl                                               | MeCN    | CH <sub>3</sub> CO <sub>2</sub> Na                | 6 h  | 50                       |
| 17    | 1   | 1.5 | <i>fac</i> -Ir(ppy) <sub>3</sub> | dtbbpy | Cu(MeCN) <sub>4</sub> BF <sub>4</sub>              | MeCN    | CH <sub>3</sub> CO <sub>2</sub> Na                | 6 h  | 71                       |
| 18    | 2   | 1   | <i>fac</i> -Ir(ppy) <sub>3</sub> | dtbbpy | Cu(MeCN) <sub>4</sub> BF <sub>4</sub>              | MeCN    | CH <sub>3</sub> CO <sub>2</sub> Na                | 6 h  | 86                       |
| 19    | 1.5 | 1   | <i>fac</i> -Ir(ppy) <sub>3</sub> | dtbbpy | Cu(MeCN) <sub>4</sub> BF <sub>4</sub>              | MeCN    | CH <sub>3</sub> CO <sub>2</sub> Na                | 3 h  | 60                       |
| 20    | 1.5 | 1   | <i>fac</i> -Ir(ppy) <sub>3</sub> | dtbbpy | Cu(MeCN) <sub>4</sub> BF <sub>4</sub>              | MeCN    | CH <sub>3</sub> CO <sub>2</sub> Na                | 12 h | 87                       |

|                   |     |   |                                                                  |               |                                       |      |                                    |     |    |
|-------------------|-----|---|------------------------------------------------------------------|---------------|---------------------------------------|------|------------------------------------|-----|----|
| 21                | 1.5 | 1 | <i>fac</i> -Ir(ppy) <sub>3</sub>                                 | dtbbpy        | Cu(MeCN) <sub>4</sub> BF <sub>4</sub> | PhCl | CH <sub>3</sub> CO <sub>2</sub> Na | 6 h | <5 |
| 22                | 1.5 | 1 | <i>fac</i> -Ir(ppy) <sub>3</sub>                                 | dtbbpy        | Cu(MeCN) <sub>4</sub> BF <sub>4</sub> | DMF  | CH <sub>3</sub> CO <sub>2</sub> Na | 6 h | <5 |
| 23                | 1.5 | 1 | <i>fac</i> -Ir(ppy) <sub>3</sub>                                 | dtbbpy        | Cu(MeCN) <sub>4</sub> BF <sub>4</sub> | DCE  | CH <sub>3</sub> CO <sub>2</sub> Na | 6 h | <5 |
| 24                | 1.5 | 1 | <i>fac</i> -Ir(ppy) <sub>3</sub>                                 | dtbbpy        | Cu(MeCN) <sub>4</sub> BF <sub>4</sub> | THF  | CH <sub>3</sub> CO <sub>2</sub> Na | 6 h | <5 |
| 25                | 1.5 | 1 | <i>fac</i> -Ir(ppy) <sub>3</sub>                                 | dtbbpy        | Cu(MeCN) <sub>4</sub> BF <sub>4</sub> | EA   | CH <sub>3</sub> CO <sub>2</sub> Na | 6 h | 15 |
| 26                | 1.5 | 1 | <i>fac</i> -Ir(ppy) <sub>3</sub>                                 | 4,4-d(Me)bpy  | Cu(MeCN) <sub>4</sub> BF <sub>4</sub> | MeCN | CH <sub>3</sub> CO <sub>2</sub> Na | 6 h | 62 |
| 27                | 1.5 | 1 | <i>fac</i> -Ir(ppy) <sub>3</sub>                                 | 4,4-d(OMe)bpy | Cu(MeCN) <sub>4</sub> BF <sub>4</sub> | MeCN | CH <sub>3</sub> CO <sub>2</sub> Na | 6 h | 68 |
| 28                | 1.5 | 1 | <i>fac</i> -Ir(ppy) <sub>3</sub>                                 | bpy           | Cu(MeCN) <sub>4</sub> BF <sub>4</sub> | MeCN | CH <sub>3</sub> CO <sub>2</sub> Na | 6 h | 72 |
| 29                | 1.5 | 1 | <i>fac</i> -Ir(ppy) <sub>3</sub>                                 | 1,10-Phen     | Cu(MeCN) <sub>4</sub> BF <sub>4</sub> | MeCN | CH <sub>3</sub> CO <sub>2</sub> Na | 6 h | 60 |
| 30                | 1.5 | 1 | Ir[dF(CF <sub>3</sub> )ppy] <sub>2</sub> (dtbbpy)PF <sub>6</sub> | dtbbpy        | Cu(MeCN) <sub>4</sub> BF <sub>4</sub> | MeCN | CH <sub>3</sub> CO <sub>2</sub> Na | 6 h | <5 |
| 31                | 1.5 | 1 | [Ir(ppy) <sub>2</sub> (dtbbpy)]PF <sub>6</sub>                   | dtbbpy        | Cu(MeCN) <sub>4</sub> BF <sub>4</sub> | MeCN | CH <sub>3</sub> CO <sub>2</sub> Na | 6 h | <5 |
| 32                | 1.5 | 1 | Rhodamine 6G                                                     | dtbbpy        | Cu(MeCN) <sub>4</sub> BF <sub>4</sub> | MeCN | CH <sub>3</sub> CO <sub>2</sub> Na | 6 h | 0  |
| 33                | 1.5 | 1 | Ru(bpy) <sub>3</sub> Cl <sub>2</sub> •6H <sub>2</sub> O          | dtbbpy        | Cu(MeCN) <sub>4</sub> BF <sub>4</sub> | MeCN | CH <sub>3</sub> CO <sub>2</sub> Na | 6 h | 0  |
| 34                | 1.5 | 1 | 4CzIPN                                                           | dtbbpy        | Cu(MeCN) <sub>4</sub> BF <sub>4</sub> | MeCN | CH <sub>3</sub> CO <sub>2</sub> Na | 6 h | 0  |
| 35                | 1.5 | 1 | Thioxanthen-9-one                                                | dtbbpy        | Cu(MeCN) <sub>4</sub> BF <sub>4</sub> | MeCN | CH <sub>3</sub> CO <sub>2</sub> Na | 6 h | 0  |
| 36                | 1.5 | 1 | Ru(bpy) <sub>3</sub> (PF <sub>6</sub> ) <sub>2</sub>             | dtbbpy        | Cu(MeCN) <sub>4</sub> BF <sub>4</sub> | MeCN | CH <sub>3</sub> CO <sub>2</sub> Na | 6 h | 0  |
| 37                | 1.5 | 1 | Solvent Red 43                                                   | dtbbpy        | Cu(MeCN) <sub>4</sub> BF <sub>4</sub> | MeCN | CH <sub>3</sub> CO <sub>2</sub> Na | 6 h | 0  |
| 38                | 1.5 | 1 | Perylene                                                         | dtbbpy        | Cu(MeCN) <sub>4</sub> BF <sub>4</sub> | MeCN | CH <sub>3</sub> CO <sub>2</sub> Na | 6 h | 5  |
| 39                | 1.5 | 1 | 9-Mesityl-10-methylacridinium Perchlorate                        | dtbbpy        | Cu(MeCN) <sub>4</sub> BF <sub>4</sub> | MeCN | CH <sub>3</sub> CO <sub>2</sub> Na | 6 h | 7  |
| 40                | 1.5 | 1 | -                                                                | dtbbpy        | Cu(MeCN) <sub>4</sub> BF <sub>4</sub> | MeCN | CH <sub>3</sub> CO <sub>2</sub> Na | 6 h | 0  |
| 41                | 1.5 | 1 | <i>fac</i> -Ir(ppy) <sub>3</sub>                                 | -             | Cu(MeCN) <sub>4</sub> BF <sub>4</sub> | MeCN | CH <sub>3</sub> CO <sub>2</sub> Na | 6 h | 63 |
| 42                | 1.5 | 1 | <i>fac</i> -Ir(ppy) <sub>3</sub>                                 | dtbbpy        | -                                     | MeCN | CH <sub>3</sub> CO <sub>2</sub> Na | 6 h | 0  |
| 43                | 1.5 | 1 | <i>fac</i> -Ir(ppy) <sub>3</sub>                                 | dtbbpy        | Cu(MeCN) <sub>4</sub> BF <sub>4</sub> | MeCN | -                                  | 6 h | 36 |
| 44 <sup>[d]</sup> | 1.5 | 1 | <i>fac</i> -Ir(ppy) <sub>3</sub>                                 | dtbbpy        | Cu(MeCN) <sub>4</sub> BF <sub>4</sub> | MeCN | CH <sub>3</sub> CO <sub>2</sub> Na | 6 h | 0  |
| 45 <sup>[e]</sup> | 1.5 | 1 | <i>fac</i> -Ir(ppy) <sub>3</sub>                                 | dtbbpy        | Cu(MeCN) <sub>4</sub> BF <sub>4</sub> | MeCN | CH <sub>3</sub> CO <sub>2</sub> Na | 6 h | <5 |

<sup>[a]</sup> Reaction conditions: **1a** (0.15 mmol), **2e** (0.1 mmol), TMSCN (0.2 mmol), photocatalyst (0.002 mmol), Cu salt (0.01 mmol), ligand (0.015 mmol), base (0.2 mmol), solvent (1 mL), blue LED, under N<sub>2</sub>, rt. <sup>[b]</sup> Yields were determined by <sup>19</sup>F NMR spectroscopy with trifluorotoluene as an

internal standard. <sup>[c]</sup> isolated yield. <sup>[d]</sup> In the dark. <sup>[e]</sup> In air.

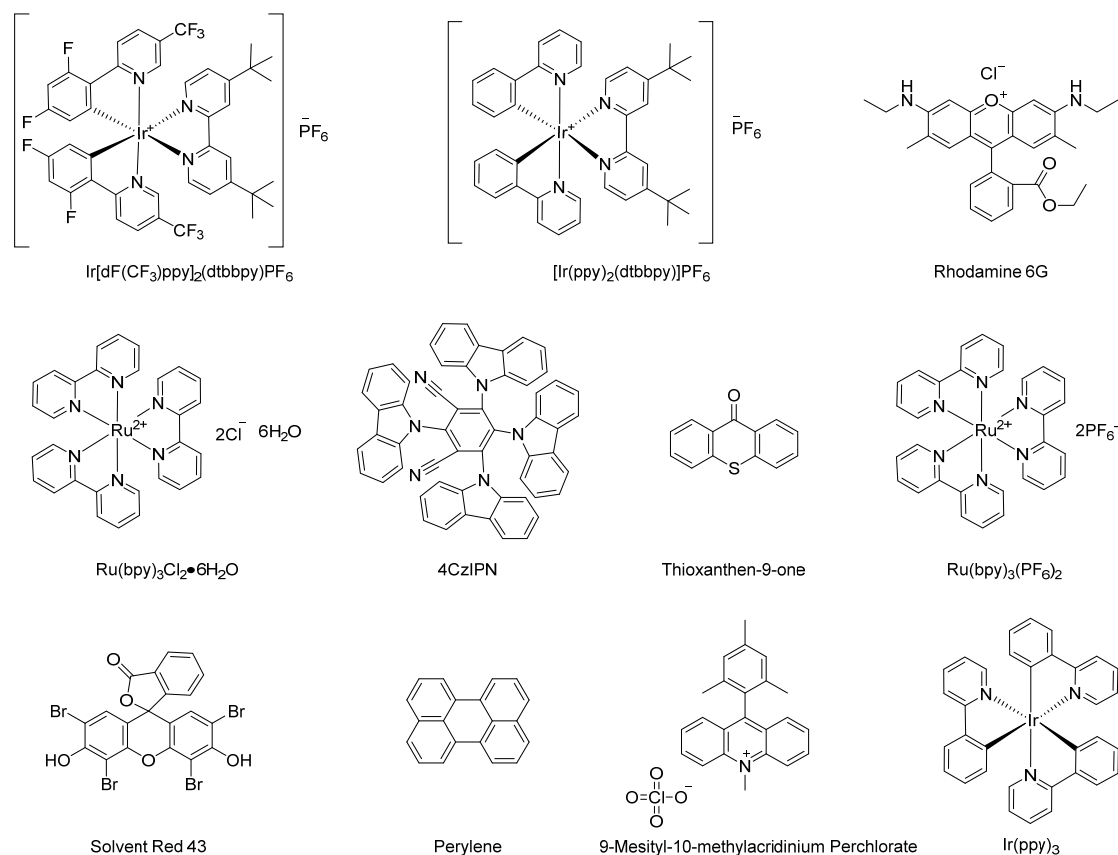

### Scheme 1. Common photocatalysts

Our study commenced with oct-1-en-3-yn-2-ylbenzene (**1a**) as the model substrate, its reactivity with difluoro(phenylthio)methyltriphenylphosphonium triflate (**2e**) and TMS-CN under photoredox/copper dual catalytic systems<sup>14</sup> was investigated (Table 1). Gratifyingly, the desired 1,4-difunctionalized product **3a** was formed in 51% yield using a catalytic system consisting of *fac*- $\text{Ir}(\text{ppy})_3$  and  $\text{Cu}(\text{MeCN})_4\text{PF}_6/\text{dtbbpy}$  with  $\text{K}_2\text{CO}_3$  as the base in MeCN under irradiation with blue LEDs (entry 1). None of the 1,2-difunctionalized product could be detected. After a series of explorations, it was found that the equivalent ratio of suitable reactants **1a/2e** is 1.5/1 (entries 1-4, 17-18). Screening of different Cu catalysts revealed that  $\text{Cu}(\text{MeCN})_4\text{BF}_4$  was optimal, increasing the yield of **3a** to 83% (entries 5-9, 14-16). Subsequently, other bases including  $\text{NaHCO}_3$ ,  $\text{K}_3\text{PO}_4$ , MeONa, CsF and NaOAc were evaluated (entries 10-13), and the best result was achieved when NaOAc as the base (entry 13). Studies of reaction duration found that 6 h was more efficient

(entries 19–20). In addition, switching MeCN to other solvents including PhCl, DMF, DCE, THF and EA proved less effective (entries 21–25). The effects of ligands on the reaction were also studied (entries 26–29). Switching the photocatalyst from *fac*-Ir(ppy)<sub>3</sub> to Ir[dF(CF<sub>3</sub>)ppy]<sub>2</sub>(dtbbpy)PF<sub>6</sub> (entry 30), [Ir(ppy)<sub>2</sub>(dtbbpy)]PF<sub>6</sub> (entry 31), Perylene (entry 38) or 9-Mesityl-10-methylacridinium Perchlorate (entry 39) led to lower yields, whereas the employment of Rhodamine 6G, Ru(bpy)<sub>3</sub>Cl<sub>2</sub>•6H<sub>2</sub>O, 4CzIPN, Thioxanthen-9-one, Ru(bpy)<sub>3</sub>(PF<sub>6</sub>)<sub>2</sub> and Solvent Red 43 as the photocatalyst could not afford any of the desired product (entries 32–37). The control experiments demonstrated that visible light, photocatalyst and Cu catalyst were necessary conditions for the reaction, while ligands and alkalis could promote the reaction (entries 40–45).

## 4. Photoredox/copper-Catalyzed Difluoroalkylation of 1,3-enyne

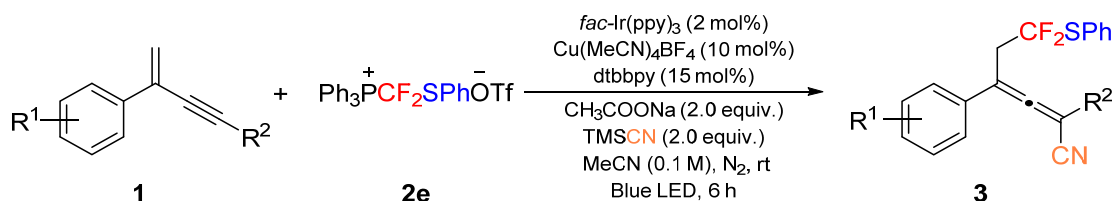

An 8 mL screw-cap vial equipped with a magnetic stir bar was charged with *fac*-Ir(ppy)<sub>3</sub> (2.6 mg, 0.004 mmol), 4,4'-di-*tert*-butyl-2,2'-bipyridine (8.0 mg, 0.03 mmol), Ph<sub>3</sub>PCF<sub>2</sub>SPhOTf (114.0 mg, 0.2 mmol), Cu(MeCN)<sub>4</sub>BF<sub>4</sub> (6.3 mg, 0.02 mmol), sodium acetate (32.8 mg, 0.4 mmol) and 1,3-enyne (0.3 mmol, if it is solid). The vial was evacuated and backfilled with nitrogen for three times. Then, MeCN (2.0 mL) and TMSCN (50 μL, 0.4 mmol) were added via a syringe (1,3-enyne is added via a micro syringe if it is liquid). The reaction mixture was placed at a distance of 10 cm from a 40 W blue LEDs and stirred at room temperature for 6 h. Then, saturated NaCl aqueous solution was added and the reaction mixture was extracted with ethyl acetate. The combined organic layers were then dried over anhydrous Na<sub>2</sub>SO<sub>4</sub>, filtered, and concentrated under reduced pressure. The residue was purified by silica gel column chromatography to give the

desired product **3**.

**2-butyl-6,6-difluoro-4-phenyl-6-(phenylthio)hexa-2,3-dienitrile**

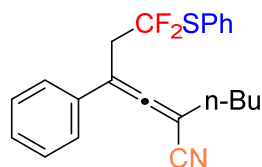

**3a**

The product mixture was purified by silica gel column chromatography (hexane/EtOAc = 30:1) to afford **3a** (65.0 mg, 88%) as yellow oil. <sup>1</sup>H NMR (400 MHz, CDCl<sub>3</sub>) δ 7.65 – 7.57 (m, 2H), 7.46 – 7.35 (m, 6H), 7.34 – 7.31 (m, 2H), 3.36 (t, *J* = 13.7 Hz, 2H), 2.45 – 2.33 (m, 2H), 1.67 – 1.59 (m, 2H), 1.44 – 1.37 (m, 2H), 0.94 (t, *J* = 7.4 Hz, 3H); <sup>13</sup>C NMR (101 MHz, CDCl<sub>3</sub>) δ 213.9, 136.4, 132.9, 131.1, 129.3, 128.9, 128.8, 128.3 (t, *J* = 282.8 Hz), 126.8, 126.5, 114.8, 103.9, 86.3, 36.6 (t, *J* = 30.3 Hz), 31.4, 29.7, 22.0, 13.8; <sup>19</sup>F NMR (377 MHz, CDCl<sub>3</sub>) δ -70.76 (AB-t, *J* = 206.8, 15.0 Hz, 2F); IR (thin film) ν 2959, 2214, 1442, 1259, 1022, 797, 693 cm<sup>-1</sup>; MS (ESI): *m/z* 392 [M+Na]<sup>+</sup>; HRMS (ESI-TOF): *m/z* Calculated for C<sub>22</sub>H<sub>21</sub>NF<sub>2</sub>NaS [M+Na]<sup>+</sup>: 392.1260; Found: 392.1257.

**2-butyl-6,6-difluoro-6-(phenylthio)-4-(p-tolyl)hexa-2,3-dienitrile**

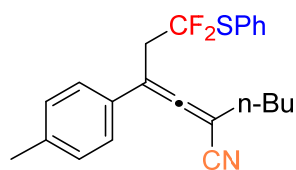

**3b**

The product mixture was purified by silica gel column chromatography (hexane/EtOAc = 30:1) to afford **3b** (68.2 mg, 89%) as yellow oil. <sup>1</sup>H NMR (400 MHz, CDCl<sub>3</sub>) δ 7.64 – 7.58 (m, 2H), 7.47 – 7.35 (m, 3H), 7.23 – 7.17 (m, 4H), 3.33 (t, *J* = 13.7 Hz, 2H), 2.37 (s, 5H), 1.65 – 1.57 (m, 2H), 1.44 – 1.35 (m, 2H), 0.96 – 0.90 (m, 3H); <sup>13</sup>C NMR (101 MHz, CDCl<sub>3</sub>) δ 213.8, 138.9, 136.4, 130.2, 129.8, 129.7, 129.3, 128.3 (t, *J* = 282.8 Hz), 126.7, 126.5, 115.0, 103.8, 86.2, 39.6 (t, *J* = 30.3 Hz), 31.5, 29.7, 22.1, 21.3, 13.8; <sup>19</sup>F NMR (376 MHz, CDCl<sub>3</sub>) δ -70.72 (AB-t, *J* = 206.8,



15.0 Hz, 2F); **IR** (thin film)  $\nu$  2961, 2214, 1328, 1259, 1020, 797  $\text{cm}^{-1}$ ; **MS** (ESI):  $m/z$  406  $[\text{M}+\text{Na}]^+$ ; **HRMS** (ESI-TOF):  $m/z$  Calculated for  $\text{C}_{23}\text{H}_{23}\text{NF}_2\text{NaS}$   $[\text{M}+\text{Na}]^+$ : 406.1417; Found: 406.1421.

**2-butyl-6,6-difluoro-6-(phenylthio)-4-(o-tolyl)hexa-2,3-dienenitrile**

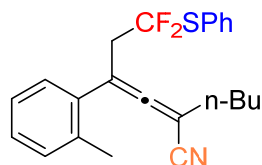

**3c**

The product mixture was purified by silica gel column chromatography (hexane/EtOAc = 30:1) to afford **3c** (63.6 mg, 83%) as yellow oil.  **$^1\text{H}$  NMR** (400 MHz,  $\text{CDCl}_3$ )  $\delta$  7.60 – 7.54 (m, 2H), 7.45 – 7.35 (m, 3H), 7.26 – 7.21 (m, 3H), 7.21 – 7.19 (m, 1H), 3.24 (td,  $J$  = 13.6, 4.3 Hz, 2H), 2.40 (s, 3H), 2.32 – 2.27 (m, 2H), 1.61 – 1.54 (m, 2H), 1.39 – 1.33 (m, 2H), 0.92 (t,  $J$  = 7.3 Hz, 3H);  **$^{13}\text{C}$  NMR** (101 MHz,  $\text{CDCl}_3$ )  $\delta$  211.9, 136.3, 136.0, 133.7, 131.0, 130.1, 129.3, 128.6, 128.2, 128.2 (t,  $J$  = 282.8 Hz), 126.5, 126.4, 115.0, 102.3, 83.7, 42.8 (t,  $J$  = 30.3 Hz), 31.0, 29.7, 22.0, 20.4, 13.8;  **$^{19}\text{F}$  NMR** (376 MHz,  $\text{CDCl}_3$ )  $\delta$  -71.01 (AB-t,  $J$  = 206.8, 15.0 Hz, 2F); **IR** (thin film)  $\nu$  2925, 2218, 1959, 1446, 1259, 1025, 797  $\text{cm}^{-1}$ ; **MS** (ESI):  $m/z$  406  $[\text{M}+\text{Na}]^+$ ; **HRMS** (ESI-TOF):  $m/z$  Calculated for  $\text{C}_{23}\text{H}_{23}\text{NF}_2\text{NaS}$   $[\text{M}+\text{Na}]^+$ : 406.1417; Found: 406.1418.

**2-butyl-6,6-difluoro-6-(phenylthio)-4-(m-tolyl)hexa-2,3-dienenitrile**

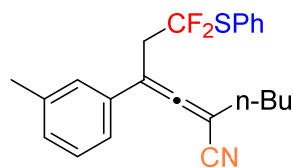

**3d**

The product mixture was purified by silica gel column chromatography (hexane/EtOAc = 30:1) to afford **3d** (61.3 mg, 80%) as yellow oil.  **$^1\text{H}$  NMR** (400 MHz,  $\text{CDCl}_3$ )  $\delta$  7.61 – 7.56 (m, 2H), 7.44 – 7.33 (m, 3H), 7.25 – 7.22 (m, 1H), 7.14 – 7.06 (m, 3H), 3.31 (t,  $J$  = 13.7 Hz, 2H), 2.37 – 2.31 (m, 5H), 1.59 (td,  $J$  = 7.6, 3.5 Hz, 2H), 1.43 – 1.35 (m, 2H), 0.90 (t,  $J$  = 7.3 Hz, 3H);  **$^{13}\text{C}$  NMR** (101 MHz,  $\text{CDCl}_3$ )  $\delta$  213.9, 138.7, 136.4, 132.9, 130.2, 129.6, 129.3, 128.9, 128.3 (t,  $J$  = 282.8

Hz), 127.5, 126.6, 123.9, 114.9, 103.9, 86.2, 39.7 (t,  $J = 30.3$  Hz), 31.5, 29.8, 22.1, 21.6, 13.8;  $^{19}\text{F}$  NMR (377 MHz,  $\text{CDCl}_3$ )  $\delta$  -70.79 (AB-t,  $J = 206.8, 15.0$  Hz, 2F); IR (thin film)  $\nu$  2968, 2210, 1259, 1023, 797, 693  $\text{cm}^{-1}$ ; MS (ESI):  $m/z$  406  $[\text{M}+\text{Na}]^+$ ; HRMS (ESI-TOF):  $m/z$  Calculated for  $\text{C}_{23}\text{H}_{23}\text{NF}_2\text{NaS}$   $[\text{M}+\text{Na}]^+$ : 406.1417; Found: 406.1415.

**2-butyl-4-(3,5-dimethylphenyl)-6,6-difluoro-6-(phenylthio)hexa-2,3-dienenitrile**

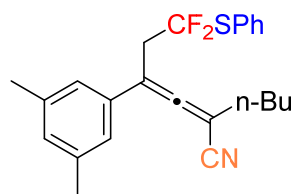

**3e**

The product mixture was purified by silica gel column chromatography (hexane/EtOAc = 30:1) to afford **3e** (65.9 mg, 83%) as yellow oil.  $^1\text{H}$  NMR (400 MHz,  $\text{CDCl}_3$ )  $\delta$  7.68 – 7.57 (m, 2H), 7.47 – 7.36 (m, 3H), 7.00 – 6.95 (m, 1H), 6.94 – 6.86 (m, 2H), 3.34 (t,  $J = 13.7$  Hz, 2H), 2.41 – 2.36 (m, 2H), 2.34 (s, 6H), 1.64 (td,  $J = 7.5, 4.0$  Hz, 2H), 1.47 – 1.38 (m, 2H), 0.95 (t,  $J = 7.3$  Hz, 3H);  $^{13}\text{C}$  NMR (101 MHz,  $\text{CDCl}_3$ )  $\delta$  213.9, 138.5, 136.4, 132.7, 130.5, 130.1, 129.2, 128.3 (t,  $J = 282.8$  Hz), 126.6, 124.6, 115.0, 103.9, 86.0, 39.6 (t,  $J = 30.3$  Hz), 31.4, 29.7, 22.0, 21.4, 13.8;  $^{19}\text{F}$  NMR (376 MHz,  $\text{CDCl}_3$ )  $\delta$  -70.69 (AB-t,  $J = 206.8, 15.0$  Hz, 2F); IR (thin film)  $\nu$  2961, 2204, 1259, 1020, 797, 694  $\text{cm}^{-1}$ ; MS (ESI):  $m/z$  420  $[\text{M}+\text{Na}]^+$ ; HRMS (ESI-TOF):  $m/z$  Calculated for  $\text{C}_{24}\text{H}_{25}\text{NF}_2\text{NaS}$   $[\text{M}+\text{Na}]^+$ : 420.1573; Found: 420.1577.

**2-butyl-4-(4-(tert-butyl)phenyl)-6,6-difluoro-6-(phenylthio)hexa-2,3-dienenitrile**

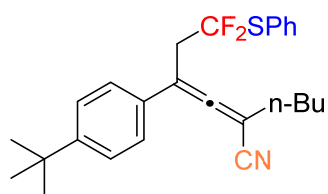

**3f**

The product mixture was purified by silica gel column chromatography (hexane/EtOAc = 30:1) to afford **3f** (79.1 mg, 93%) as yellow oil.  $^1\text{H}$  NMR (400 MHz,  $\text{CDCl}_3$ )  $\delta$  7.62 – 7.58 (m, 2H), 7.45 – 7.35 (m, 5H), 7.26 – 7.24 (m, 1H), 7.24 – 7.21 (m, 1H), 3.33 (t,  $J = 13.7$  Hz, 2H), 2.38 – 2.31 (m, 2H), 1.65 – 1.57 (m, 2H), 1.43 – 1.37 (m, 2H), 1.32 (s, 9H), 0.92 (t,  $J = 7.3$  Hz, 3H);  $^{13}\text{C}$  NMR (101 MHz,  $\text{CDCl}_3$ )  $\delta$  214.0, 152.1, 136.4, 132.2, 130.1, 129.8, 128.6, 128.3 (t,  $J = 282.8$  Hz),

126.5, 126.0, 114.9, 103.6, 39.5 (t,  $J = 30.3$  Hz), 34.8, 31.5, 31.3, 29.8, 22.1, 13.8;  $^{19}\text{F}$  NMR (376 MHz,  $\text{CDCl}_3$ )  $\delta$  -70.68 (AB-t,  $J = 206.8, 15.0$  Hz, 2F); IR (thin film)  $\nu$  2961, 2218, 1259, 1020, 797  $\text{cm}^{-1}$ ; MS (ESI):  $m/z$  448  $[\text{M}+\text{Na}]^+$ ; HRMS (ESI-TOF):  $m/z$  Calculated for  $\text{C}_{26}\text{H}_{29}\text{NF}_2\text{NaS}$   $[\text{M}+\text{Na}]^+$ : 448.1886; Found: 448.1890.

#### 2-butyl-4-(2-chlorophenyl)-6,6-difluoro-6-(phenylthio)hexa-2,3-dienitrile

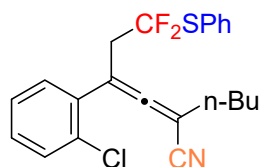

**3g**

The product mixture was purified by silica gel column chromatography (hexane/EtOAc = 30:1) to afford **3g** (63.7 mg, 79%) as yellow oil.  $^1\text{H}$  NMR (400 MHz,  $\text{CDCl}_3$ )  $\delta$  7.59 – 7.55 (m, 2H), 7.45 – 7.40 (m, 2H), 7.39 – 7.34 (m, 2H), 7.33 – 7.27 (m, 3H), 3.30 (t,  $J = 13.6$  Hz, 2H), 2.35 – 2.29 (m, 2H), 1.62 – 1.54 (m, 2H), 1.40 – 1.32 (m, 2H), 0.91 (t,  $J = 7.4$  Hz, 3H);  $^{13}\text{C}$  NMR (101 MHz,  $\text{CDCl}_3$ )  $\delta$  212.6, 136.4, 133.1, 132.8, 130.5, 130.3, 130.1, 130.0, 129.3, 128.2 (t,  $J = 282.8$  Hz), 127.2, 126.4, 114.8, 101.7 (t,  $J = 10.1$  Hz), 84.4, 41.9 (t,  $J = 30.3$  Hz), 30.9, 29.6, 21.9, 13.8.  $^{19}\text{F}$  NMR (376 MHz,  $\text{CDCl}_3$ )  $\delta$  -70.97 (td,  $J = 13.5, 2.5$  Hz, 2F); IR (thin film)  $\nu$  2960, 2221, 1259, 1020, 797  $\text{cm}^{-1}$ ; MS (ESI):  $m/z$  426  $[\text{M}+\text{Na}]^+$ ; HRMS (ESI-TOF):  $m/z$  Calculated for  $\text{C}_{22}\text{H}_{20}\text{NF}_2\text{NaSCl}$   $[\text{M}+\text{Na}]^+$ : 426.0871; Found: 426.0874.

#### 4-(2-bromophenyl)-2-butyl-6,6-difluoro-6-(phenylthio)hexa-2,3-dienitrile

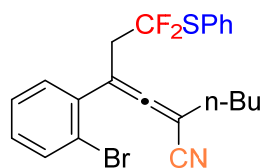

**3h**

The product mixture was purified by silica gel column chromatography (hexane/EtOAc = 30:1) to afford **3h** (59.0 mg, 66%) as yellow oil.  $^1\text{H}$  NMR (400 MHz,  $\text{CDCl}_3$ )  $\delta$  7.64 – 7.52 (m, 3H), 7.46 – 7.29 (m, 5H), 7.24 – 7.18 (m, 1H), 3.28 (t,  $J = 13.6$  Hz, 2H), 2.35 – 2.27 (m, 2H), 1.62 – 1.57 (m, 2H), 1.38 – 1.32 (m, 2H), 0.90 (t,  $J = 7.3$  Hz, 3H);  $^{13}\text{C}$  NMR (101 MHz,  $\text{CDCl}_3$ )  $\delta$  212.4, 136.4, 135.3, 133.5, 130.7, 130.2, 129.3, 128.9, 128.2 (t,  $J = 282.8$  Hz), 127.8, 126.5, 122.6, 114.8,

103.5, 84.6, 42.2 (t,  $J = 30.3$  Hz), 31.0, 29.6, 22.0, 13.8;  $^{19}\text{F}$  NMR (376 MHz,  $\text{CDCl}_3$ )  $\delta$  -70.93 (td,  $J = 13.6, 8.8$  Hz, 2F); IR (thin film)  $\nu$  2960, 2221, 1259, 1020, 797, 693  $\text{cm}^{-1}$ ; MS (ESI):  $m/z$  470  $[\text{M}+\text{Na}]^+$ ; HRMS (ESI-TOF):  $m/z$  Calculated for  $\text{C}_{22}\text{H}_{20}\text{NF}_2\text{NaSBr}$   $[\text{M}+\text{Na}]^+$ : 470.0366; Found: 470.0369.

**2-butyl-6,6-difluoro-4-(4-fluorophenyl)-6-(phenylthio)hexa-2,3-dienitrile**

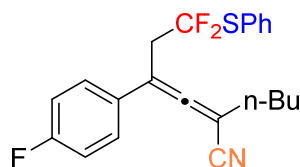

**3i**

The product mixture was purified by silica gel column chromatography (hexane/EtOAc = 30:1) to afford **3j** (53.4 mg, 69%) as yellow oil.  $^1\text{H}$  NMR (400 MHz,  $\text{CDCl}_3$ )  $\delta$  7.66 – 7.51 (m, 2H), 7.47 – 7.34 (m, 3H), 7.30 – 7.26 (m, 2H), 7.10 – 7.01 (m, 2H), 3.31 (t,  $J = 13.6$  Hz, 2H), 2.41 – 2.28 (m, 2H), 1.63 – 1.58 (m, 2H), 1.42 – 1.35 (m, 2H), 0.92 (t,  $J = 7.3$  Hz, 3H);  $^{13}\text{C}$  NMR (101 MHz,  $\text{CDCl}_3$ )  $\delta$  213.7, 162.9 (d,  $J = 121.2$  Hz), 136.4, 130.2, 129.3, 128.9 (d,  $J = 10.1$  Hz), 128.8 (d,  $J = 10.1$  Hz), 128.2 (t,  $J = 282.8$  Hz), 126.4, 116.1 (d,  $J = 10.1$  Hz), 114.7, 103.2 (t,  $J = 10.1$  Hz), 86.5, 39.9 (t,  $J = 30.3$  Hz), 31.5, 29.7, 22.1, 13.8;  $^{19}\text{F}$  NMR (376 MHz,  $\text{CDCl}_3$ )  $\delta$  -70.84 (AB-t,  $J = 206.8, 15.0$  Hz, 2F), -112.47 (ddd,  $J = 13.3, 8.3, 5.0$  Hz); IR (thin film)  $\nu$  2960, 1945, 1259, 1019, 797, 693  $\text{cm}^{-1}$ ; MS (ESI):  $m/z$  410  $[\text{M}+\text{Na}]^+$ ; HRMS (ESI-TOF):  $m/z$  Calculated for  $\text{C}_{22}\text{H}_{20}\text{NF}_3\text{NaS}$   $[\text{M}+\text{Na}]^+$ : 410.1166; Found: 410.1162.

**2-butyl-4-(4-chlorophenyl)-6,6-difluoro-6-(phenylthio)hexa-2,3-dienitrile**

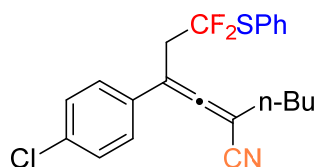

**3j**

The product mixture was purified by silica gel column chromatography (hexane/EtOAc = 30:1) to afford **3j** (53.2 mg, 66%) as yellow oil.  $^1\text{H}$  NMR (400 MHz,  $\text{CDCl}_3$ )  $\delta$  7.63 – 7.55 (m, 2H), 7.47 – 7.42 (m, 1H), 7.41 – 7.36 (m, 2H), 7.36 – 7.32 (m, 2H), 7.24 – 7.20 (m, 2H), 3.31 (t,  $J = 13.6$  Hz, 2H), 2.40 – 2.30 (m, 2H), 1.59 (dd,  $J = 7.5, 3.8$  Hz, 2H), 1.42 – 1.35 (m, 2H), 0.92 (t,  $J = 7.4$  Hz,

3H);  $^{13}\text{C NMR}$  (101 MHz,  $\text{CDCl}_3$ )  $\delta$  213.8, 149.3, 136.4, 134.8, 131.4, 130.3, 129.3, 129.2, 128.2 (t,  $J = 282.8$  Hz), 128.1, 114.5, 103.1, 86.7, 39.7 (t,  $J = 30.3$  Hz), 31.4, 29.7, 22.1, 13.8;  $^{19}\text{F NMR}$  (376 MHz,  $\text{CDCl}_3$ )  $\delta$  70.68 (AB-t,  $J = 206.8, 15.0$  Hz, 2F); **IR** (thin film)  $\nu$  2961, 2210, 1259, 1019, 797  $\text{cm}^{-1}$ ; **MS** (ESI):  $m/z$  426  $[\text{M}+\text{Na}]^+$ ; **HRMS** (ESI-TOF):  $m/z$  Calculated for  $\text{C}_{22}\text{H}_{20}\text{NF}_2\text{NaSCl}$   $[\text{M}+\text{Na}]^+$ : 426.0871; Found: 426.0875.

**2-butyl-6,6-difluoro-4-(2-methoxyphenyl)-6-(phenylthio)hexa-2,3-dienitrile**

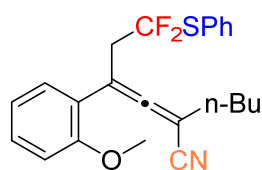

**3k**

The product mixture was purified by silica gel column chromatography (hexane/EtOAc = 30:1) to afford **3k** (61.4 mg, 77%) as yellow oil.  $^1\text{H NMR}$  (400 MHz,  $\text{CDCl}_3$ )  $\delta$  7.61 – 7.52 (m, 2H), 7.44 – 7.29 (m, 4H), 7.23 – 7.16 (m, 1H), 7.01 – 6.93 (m, 1H), 6.93 – 6.87 (m, 1H), 3.83 (s, 3H), 3.35 (td,  $J = 14.1, 6.1$  Hz, 2H), 2.31 (t,  $J = 7.7$  Hz, 2H), 1.64 – 1.56 (m, 2H), 1.42 – 1.34 (m, 2H), 0.92 (t,  $J = 7.3$  Hz, 3H);  $^{13}\text{C NMR}$  (101 MHz,  $\text{CDCl}_3$ )  $\delta$  213.8, 156.8, 136.3, 130.2, 130.0, 130.0, 129.2, 128.5 (t,  $J = 282.8$  Hz), 126.8, 122.8, 120.9, 115.5, 111.3, 101.5 (t,  $J = 10.1$  Hz), 83.0, 55.6, 41.0 (t,  $J = 30.3$  Hz), 31.3, 29.7, 22.0, 13.8;  $^{19}\text{F NMR}$  (376 MHz,  $\text{CDCl}_3$ )  $\delta$  -70.91 (q,  $J = 14.2$  Hz, 2F); **IR** (thin film)  $\nu$  2961, 2214, 1259, 1020, 797, 694  $\text{cm}^{-1}$ ; **MS** (ESI):  $m/z$  422  $[\text{M}+\text{Na}]^+$ ; **HRMS** (ESI-TOF):  $m/z$  Calculated for  $\text{C}_{23}\text{H}_{23}\text{NOF}_2\text{NaS}$   $[\text{M}+\text{Na}]^+$ : 422.1366; Found: 422.1366.

**2-butyl-6,6-difluoro-6-(phenylthio)-4-(3-(trifluoromethyl)phenyl)hexa-2,3-dienitrile**

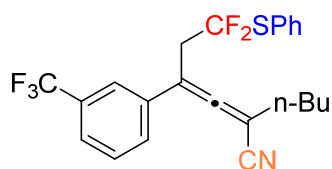

**3l**

The product mixture was purified by silica gel column chromatography (hexane/EtOAc = 30:1) to afford **3l** (76.9 mg, 88%) as yellow oil.  $^1\text{H NMR}$  (400 MHz,  $\text{CDCl}_3$ )  $\delta$  7.6 – 7.6 (m, 3H), 7.5 – 7.5 (m, 3H), 7.5 – 7.4 (m, 2H), 7.4 – 7.4 (m, 1H), 3.4 (t,  $J = 13.6$  Hz, 2H), 2.4 (t,  $J = 7.6$  Hz, 2H), 1.7

- 1.6 (m, 2H), 1.4 – 1.4 (m, 2H), 0.9 (t,  $J = 7.3$  Hz, 3H);  $^{13}\text{C NMR}$  (101 MHz,  $\text{CDCl}_3$ )  $\delta$  213.9, 136.4, 134.1, 131.4 (q,  $J = 30.3$  Hz), 130.3, 130.1, 129.6, 129.4, 128.1 (t,  $J = 282.8$  Hz), 126.3, 125.5, 123.4, 122.5, 114.3, 103.1, 87.1, 39.6 (t,  $J = 30.3$  Hz), 31.4, 29.7, 22.0, 13.8;  $^{19}\text{F NMR}$  (376 MHz,  $\text{CDCl}_3$ )  $\delta$  -62.77, -71.02 (AB-t,  $J = 206.8, 15.0$  Hz, 2F); **IR** (thin film)  $\nu$  2961, 2214, 1328, 1259, 1020, 798, 695  $\text{cm}^{-1}$ ; **MS** (ESI):  $m/z$  460  $[\text{M}+\text{Na}]^+$ ; **HRMS** (ESI-TOF):  $m/z$  Calculated for  $\text{C}_{23}\text{H}_{20}\text{NF}_5\text{NaS}$   $[\text{M}+\text{Na}]^+$ : 460.1134; Found: 460.1136.

**4-(5-cyano-1,1-difluoro-1-(phenylthio)nona-3,4-dien-3-yl)benzonitrile**

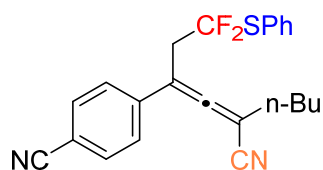

**3m**

The product mixture was purified by silica gel column chromatography (hexane/EtOAc = 30:1) to afford **3m** (44.9 mg, 57%) as yellow oil.  $^1\text{H NMR}$  (400 MHz,  $\text{CDCl}_3$ )  $\delta$  7.70 (d,  $J = 8.5$  Hz, 2H), 7.59 (d,  $J = 7.0$  Hz, 2H), 7.46 – 7.36 (m, 3H), 7.03 (d,  $J = 8.6$  Hz, 2H), 3.29 (t,  $J = 13.6$  Hz, 2H), 2.38 – 2.32 (m, 2H), 1.61 – 1.55 (m, 2H), 1.42 – 1.36 (m, 2H), 0.92 (t,  $J = 7.3$  Hz, 3H);  $^{13}\text{C NMR}$  (101 MHz,  $\text{CDCl}_3$ )  $\delta$  213.8, 138.2, 136.4, 132.6, 130.3, 129.4, 128.5, 128.2 (t,  $J = 282.8$  Hz), 126.4, 124.6, 114.3, 113.7, 94.7, 86.8, 39.6 (t,  $J = 20.2$  Hz), 31.4, 29.7, 22.1, 13.8;  $^{19}\text{F NMR}$  (376 MHz,  $\text{CDCl}_3$ )  $\delta$  -70.92 (AB-t,  $J = 206.8, 15.0$  Hz, 2F); **IR** (thin film)  $\nu$  2960, 2214, 1328, 1259, 1020, 798, 697  $\text{cm}^{-1}$ ; **MS** (ESI):  $m/z$  395  $[\text{M}+\text{H}]^+$ ; **HRMS** (ESI-TOF):  $m/z$  Calculated for  $\text{C}_{23}\text{H}_{21}\text{N}_2\text{F}_2\text{S}$   $[\text{M}+\text{H}]^+$ : 395.1394; Found: 395.1389.

**4-([1,1'-biphenyl]-4-yl)-2-butyl-6,6-difluoro-6-(phenylthio)hexa-2,3-dienitrile**

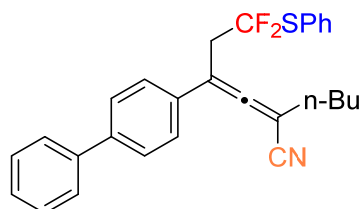

**3n**

The product mixture was purified by silica gel column chromatography (hexane/EtOAc = 30:1) to afford **3n** (60.5 mg, 68%) as yellow oil.  $^1\text{H NMR}$  (400 MHz,  $\text{CDCl}_3$ )  $\delta$  7.63 – 7.58 (m, 5H), 7.50

– 7.42 (m, 4H), 7.41 – 7.36 (m, 5H), 3.38 (t,  $J = 13.7$  Hz, 2H), 2.43 – 2.34 (m, 2H), 1.67 – 1.61 (m, 2H), 1.44 – 1.38 (m, 2H), 0.93 (t,  $J = 7.3$  Hz, 3H);  $^{13}\text{C}$  NMR (101 MHz,  $\text{CDCl}_3$ )  $\delta$  214.1, 150.2, 141.6, 140.7, 140.2, 136.4, 131.7, 130.2, 129.3, 129.0, 128.3 (t,  $J = 282.8$  Hz), 127.9, 127.7, 127.1, 114.8, 103.7, 86.5, 39.6 (t,  $J = 30.3$  Hz), 31.5, 29.8, 22.1, 13.8;  $^{19}\text{F}$  NMR (376 MHz,  $\text{CDCl}_3$ )  $\delta$  -70.68 (AB-t,  $J = 206.8$ , 15.0 Hz, 2F); IR (thin film)  $\nu$  2960, 2221, 1259, 1019, 797, 693  $\text{cm}^{-1}$ ; MS (ESI):  $m/z$  468  $[\text{M}+\text{Na}]^+$ ; HRMS (ESI-TOF):  $m/z$  Calculated for  $\text{C}_{28}\text{H}_{25}\text{NF}_2\text{NaS}$   $[\text{M}+\text{Na}]^+$ : 468.1573; Found: 468.1569.

#### 4-(4-(benzyloxy)phenyl)-2-butyl-6,6-difluoro-6-(phenylthio)hexa-2,3-dienitrile

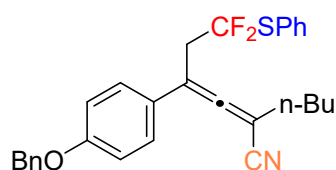

**3o**

The product mixture was purified by silica gel column chromatography (hexane/EtOAc = 30:1) to afford **3o** (62.7 mg, 66%) as yellow oil.  $^1\text{H}$  NMR (400 MHz,  $\text{CDCl}_3$ )  $\delta$  7.63 – 7.56 (m, 2H), 7.46 – 7.40 (m, 4H), 7.39 – 7.32 (m, 4H), 7.25 – 7.23 (m, 1H), 7.23 – 7.21 (m, 1H), 6.99 – 6.97 (m, 1H), 6.97 – 6.94 (m, 1H), 5.08 (s, 2H), 3.30 (t,  $J = 13.7$  Hz, 2H), 2.34 (td,  $J = 7.2$ , 1.2 Hz, 2H), 1.61 – 1.57 (m, 2H), 1.42 – 1.37 (m, 2H), 1.27 – 1.25 (m, 2H), 0.92 (t,  $J = 7.3$  Hz, 3H);  $^{13}\text{C}$  NMR (101 MHz,  $\text{CDCl}_3$ )  $\delta$  213.8, 159.2, 158.5, 150.8, 136.4, 130.1, 129.3, 128.8, 128.3 (t,  $J = 282.8$  Hz), 128.2, 128.1, 127.7, 127.5, 125.1, 115.5, 103.5, 86.2, 70.2, 39.7 (t,  $J = 30.3$  Hz), 31.5, 22.6, 22.1, 13.8;  $^{19}\text{F}$  NMR (376 MHz,  $\text{CDCl}_3$ )  $\delta$  -70.58 (AB-t,  $J = 206.8$ , 15.0 Hz, 2F); IR (thin film)  $\nu$  2958, 2217, 1604, 1510, 1255, 1020, 798, 740, 695  $\text{cm}^{-1}$ ; MS (ESI):  $m/z$  498  $[\text{M}+\text{Na}]^+$ ; HRMS (ESI-TOF):  $m/z$  Calculated for  $\text{C}_{29}\text{H}_{27}\text{NOF}_2\text{NaS}$   $[\text{M}+\text{Na}]^+$ : 498.1672; Found: 498.1679.

#### 2-butyl-4-(3-chlorophenyl)-6,6-difluoro-5-methyl-6-(phenylthio)hexa-2,3-dienitrile

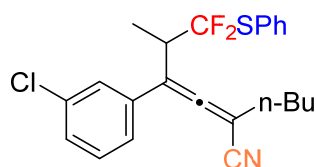

**3p**

The product mixture was purified by silica gel column chromatography (hexane/EtOAc = 30:1) to afford **3p** (58.4 mg, 70%) as yellow oil.  $^1\text{H NMR}$  (400 MHz,  $\text{CDCl}_3$ )  $\delta$  7.63 – 7.51 (m, 2H), 7.47 – 7.33 (m, 3H), 7.32 – 7.27 (m, 2H), 7.24 – 7.20 (m, 1H), 7.20 – 7.13 (m, 1H), 3.44 – 3.34 (m, 1H), 2.41 – 2.31 (m, 2H), 1.62 – 1.58 (m, 2H), 1.45 (dd,  $J = 18.4, 7.1$  Hz, 3H), 1.42 – 1.36 (m, 2H), 0.92 (td,  $J = 7.3, 2.4$  Hz, 3H);  $^{13}\text{C NMR}$  (101 MHz,  $\text{CDCl}_3$ )  $\delta$  213.3 (d,  $J = 20.2$  Hz), 136.5 (d,  $J = 20.2$  Hz), 135.7 (d,  $J = 20.2$  Hz), 135.0, 130.2 (d,  $J = 10.1$  Hz), 130.1 (d,  $J = 10.1$  Hz), 129.3 (d,  $J = 10.1$  Hz), 128.8 (d,  $J = 10.1$  Hz), 128.2 (t,  $J = 282.8$  Hz), 127.1, 126.3 (d,  $J = 10.1$  Hz), 125.3, 114.5 (d,  $J = 20.2$  Hz), 110.3 (d,  $J = 40.4$  Hz), 88.1 (d,  $J = 40.4$  Hz), 43.7 (q,  $J = 20.2$  Hz), 31.4 (d,  $J = 40.4$  Hz), 29.8 (d,  $J = 10.1$  Hz), 22.1 (d,  $J = 10.1$  Hz), 15.6, 13.8;  $^{19}\text{F NMR}$  (376 MHz,  $\text{CDCl}_3$ )  $\delta$  -74.20 – -78.61 (m, 2F); **IR** (thin film)  $\nu$  2927, 2217, 1639, 1580, 1466, 793, 749, 692  $\text{cm}^{-1}$ ; **MS** (ESI):  $m/z$  440  $[\text{M}+\text{Na}]^+$ ; **HRMS** (ESI-TOF):  $m/z$  Calculated for  $\text{C}_{23}\text{H}_{22}\text{NF}_2\text{NaSCl}$   $[\text{M}+\text{Na}]^+$ : 440.1027; Found: 440.1023.

**2-butyl-6,6-difluoro-6-(phenylthio)-4-(pyridin-3-yl)hexa-2,3-dienitrile**

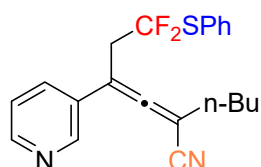

**3q**

The product mixture was purified by silica gel column chromatography (hexane/EtOAc = 10:1) to afford **3q** (38.5 mg, 52%) as yellow oil.  $^1\text{H NMR}$  (400 MHz,  $\text{CDCl}_3$ )  $\delta$  8.59 – 8.56 (m, 1H), 8.56 – 8.52 (m, 1H), 7.65 – 7.55 (m, 3H), 7.47 – 7.36 (m, 3H), 7.33 – 7.28 (m, 1H), 3.33 (t,  $J = 13.6$  Hz, 2H), 2.41 – 2.31 (m, 2H), 1.65 – 1.56 (m, 2H), 1.42 – 1.36 (m, 2H), 0.91 (t,  $J = 7.3$  Hz, 3H);  $^{13}\text{C NMR}$  (101 MHz,  $\text{CDCl}_3$ )  $\delta$  213.6, 149.7, 148.0, 136.4, 134.0, 130.3, 129.4, 129.2, 128.1 (t,  $J = 282.8$  Hz), 126.2, 123.7, 114.2, 101.4, 87.1, 39.5 (t,  $J = 30.3$  Hz), 31.4, 29.7, 22.0, 13.8;  $^{19}\text{F NMR}$  (376 MHz,  $\text{CDCl}_3$ )  $\delta$  -71.21 (AB-t,  $J = 206.8, 15.0$  Hz, 2F); **IR** (thin film)  $\nu$  2961, 2204,



1259, 1020, 797, 694  $\text{cm}^{-1}$ ; **MS** (ESI):  $m/z$  371  $[\text{M}+\text{H}]^+$ ; **HRMS** (ESI-TOF):  $m/z$  Calculated for  $\text{C}_{21}\text{H}_{21}\text{N}_2\text{F}_2\text{S}$   $[\text{M}+\text{H}]^+$ : 371.1394; Found: 371.1399.

**2-(4,4-difluoro-2-phenyl-4-(phenylthio)but-1-en-1-ylidene)octanenitrile**

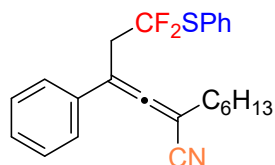

**3r**

The product mixture was purified by silica gel column chromatography (hexane/EtOAc = 30:1) to afford **3r** (72.3 mg, 91%) as yellow oil. **<sup>1</sup>H NMR** (400 MHz,  $\text{CDCl}_3$ )  $\delta$  7.62 – 7.55 (m, 2H), 7.47 – 7.29 (m, 8H), 3.34 (t,  $J$  = 13.7 Hz, 2H), 2.42 – 2.31 (m, 2H), 1.63 – 1.58 (m, 2H), 1.29 – 1.25 (m, 6H), 0.88 – 0.85 (m, 3H); **<sup>13</sup>C NMR** (101 MHz,  $\text{CDCl}_3$ )  $\delta$  213.9, 136.4, 132.9, 130.2, 129.3, 129.0, 128.8, 128.3 (t,  $J$  = 282.8 Hz), 126.8, 126.5, 114.8, 103.9, 86.4, 39.6 (t,  $J$  = 30.3 Hz), 31.8, 31.5, 28.6, 27.6, 22.6, 14.1; **<sup>19</sup>F NMR** (376 MHz,  $\text{CDCl}_3$ )  $\delta$  -70.90 (AB-t,  $J$  = 206.8, 15.0 Hz, 2F); **IR** (thin film)  $\nu$  2960, 1973, 1259, 1020, 797, 694  $\text{cm}^{-1}$ ; **MS** (ESI):  $m/z$  420  $[\text{M}+\text{Na}]^+$ ; **HRMS** (ESI-TOF):  $m/z$  Calculated for  $\text{C}_{24}\text{H}_{25}\text{NF}_2\text{NaS}$   $[\text{M}+\text{Na}]^+$ : 420.1573; Found: 420.1577.

**2-(tert-butyl)-6,6-difluoro-4-phenyl-6-(phenylthio)hexa-2,3-dienitrile**

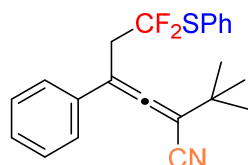

**3s**

The product mixture was purified by silica gel column chromatography (hexane/EtOAc = 30:1) to afford **3s** (58.3 mg, 79%) as yellow oil. **<sup>1</sup>H NMR** (400 MHz,  $\text{CDCl}_3$ )  $\delta$  7.66 – 7.51 (m, 2H), 7.48 – 7.27 (m, 8H), 3.52 – 3.21 (m, 2H), 1.26 (s, 9H); **<sup>13</sup>C NMR** (101 MHz,  $\text{CDCl}_3$ )  $\delta$  211.5, 136.4, 133.1, 130.2, 129.3, 129.0, 128.8, 128.3 (t,  $J$  = 282.8 Hz), 126.6, 126.5, 114.0, 105.0, 97.5, 39.7 (t,  $J$  = 30.3 Hz), 35.8, 28.8; **<sup>19</sup>F NMR** (376 MHz,  $\text{CDCl}_3$ )  $\delta$  -70.47 (AB-t,  $J$  = 206.8, 15.0 Hz, 2F); **IR** (thin film)  $\nu$  2961, 2219, 1453, 1258, 1021, 797, 692  $\text{cm}^{-1}$ ; **MS** (ESI):  $m/z$  392  $[\text{M}+\text{Na}]^+$ ; **HRMS** (ESI-TOF):  $m/z$  Calculated for  $\text{C}_{22}\text{H}_{21}\text{NF}_2\text{NaS}$   $[\text{M}+\text{Na}]^+$ : 392.1260; Found: 392.1267.

### 2-cyclopropyl-6,6-difluoro-4-phenyl-6-(phenylthio)hexa-2,3-dienitrile

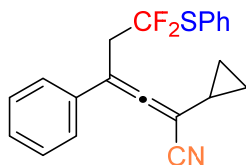

**3t**

The product mixture was purified by silica gel column chromatography (hexane/EtOAc = 30:1) to afford **3t** (37.4 mg, 53%) as yellow oil.  $^1\text{H NMR}$  (400 MHz,  $\text{CDCl}_3$ )  $^1\text{H NMR}$  (400 MHz, Chloroform-*d*)  $\delta$  7.64 – 7.55 (m, 2H), 7.47 – 7.41 (m, 1H), 7.41 – 7.32 (m, 5H), 7.32 – 7.28 (m, 2H), 3.34 (td,  $J = 12.0, 4.0$  Hz, 2H), 1.64 – 1.59 (m, 1H), 0.92 – 0.88 (m, 2H), 0.79 – 0.73 (m, 2H);  $^{13}\text{C NMR}$  (101 MHz,  $\text{CDCl}_3$ )  $\delta$  213.5, 136.5, 133.3, 130.2, 129.3, 129.0, 128.9, 128.5, 128.1 (t,  $J = 282.8$  Hz), 126.8, 113.9, 105.4, 90.0, 39.6 (t,  $J = 30.3$  Hz), 11.6, 6.6, 6.4;  $^{19}\text{F NMR}$  (376 MHz,  $\text{CDCl}_3$ )  $\delta$  -71.11 (AB-t,  $J = 206.8, 15.0$  Hz, 2F); **IR** (thin film)  $\nu$  2968, 2210, 1259, 1023, 797, 693  $\text{cm}^{-1}$ ; **MS** (ESI):  $m/z$  376  $[\text{M}+\text{Na}]^+$ ; **HRMS** (ESI-TOF):  $m/z$  Calculated for  $\text{C}_{21}\text{H}_{17}\text{NNaSF}_2$   $[\text{M}+\text{Na}]^+$ : 376.0947; Found: 376.0952.

### 6,6-difluoro-4-phenyl-6-(phenylthio)-2-(p-tolyl)hexa-2,3-dienitrile

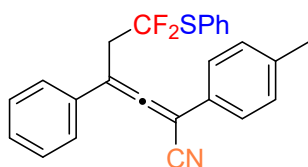

**3u**

The product mixture was purified by silica gel column chromatography (hexane/EtOAc = 30:1) to afford **3u** (33.9 mg, 42%) as yellow oil.  $^1\text{H NMR}$  (400 MHz,  $\text{CDCl}_3$ )  $\delta$  7.51 – 7.47 (m, 2H), 7.43 – 7.38 (m, 2H), 7.35 – 7.33 (m, 1H), 7.31 – 7.27 (m, 6H), 7.18 – 7.13 (m, 3H), 3.41 (td,  $J = 14.1, 13.7, 3.7$  Hz, 2H), 2.30 (s, 3H);  $^{13}\text{C NMR}$  (101 MHz,  $\text{CDCl}_3$ )  $\delta$  215.0, 139.6, 136.4, 132.4, 130.2, 130.0, 129.3, 129.3, 129.2, 128.2 (t,  $J = 282.8$  Hz), 126.9, 126.5, 126.2, 125.9, 113.5, 107.7 (t,  $J = 10.1$  Hz), 90.2, 39.7 (t,  $J = 30.3$  Hz), 21.4;  $^{19}\text{F NMR}$  (376 MHz,  $\text{CDCl}_3$ )  $\delta$  -70.99 (AB-t,  $J = 206.8, 15.0$  Hz, 2F); **IR** (thin film)  $\nu$  2920, 2224, 1439, 1028, 803, 750, 693  $\text{cm}^{-1}$ ; **MS** (ESI):  $m/z$  426

[M+Na]<sup>+</sup>; **HRMS** (ESI-TOF): *m/z* Calculated for C<sub>25</sub>H<sub>19</sub>NF<sub>2</sub>NaS [M+Na]<sup>+</sup>: 426.1104; Found: 426.1100.

**2-cyclohexyl-6,6-difluoro-4-phenyl-6-(phenylthio)hexa-2,3-dienitrile**

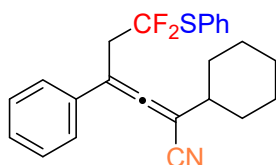

**3v**

The product mixture was purified by silica gel column chromatography (hexane/EtOAc = 30:1) to afford **3v** (66.4 mg, 84%) as yellow oil. <sup>1</sup>H NMR (400 MHz, CDCl<sub>3</sub>) δ 7.63 – 7.57 (m, 2H), 7.46 – 7.41 (m, 1H), 7.41 – 7.39 (m, 1H), 7.39 – 7.33 (m, 4H), 7.32 – 7.31 (m, 1H), 7.31 – 7.28 (m, 1H), 3.34 (td, *J* = 14.1, 13.7, 3.7 Hz, 2H), 2.34 – 2.27 (m, 1H), 2.02 – 1.94 (m, 2H), 1.83 – 1.76 (m, 2H), 1.71 – 1.66 (m, 1H), 1.63 – 1.57 (m, 1H), 1.34 – 1.31 (m, 2H), 1.28 – 1.25 (m, 2H); <sup>13</sup>C NMR (101 MHz, CDCl<sub>3</sub>) δ 212.9, 136.4, 133.0, 130.2, 129.3, 129.0, 128.7, 128.3 (t, *J* = 282.8 Hz), 126.6, 126.4, 114.3, 104.6, 92.1, 40.5, 39.7 (t, *J* = 30.3 Hz), 31.6, 25.9, 25.7; <sup>19</sup>F NMR (376 MHz, CDCl<sub>3</sub>) δ -70.36 (AB-t, *J* = 206.8, 15.0 Hz, 2F); **IR** (thin film) ν 2928, 2218, 1442, 1258, 1025, 797, 753, 692 cm<sup>-1</sup>; **MS** (ESI): *m/z* 418 [M+Na]<sup>+</sup>; **HRMS** (ESI-TOF): *m/z* Calculated for C<sub>24</sub>H<sub>23</sub>NF<sub>2</sub>NaS [M+Na]<sup>+</sup>: 418.1417; Found: 418.1422.

**2-(3-chloropropyl)-6,6-difluoro-4-phenyl-6-(phenylthio)hexa-2,3-dienitrile**

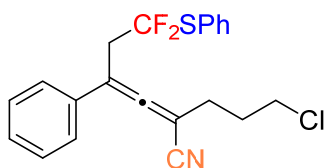

**3w**

The product mixture was purified by silica gel column chromatography (hexane/EtOAc = 30:1) to afford **3w** (31.9 mg, 41%) as yellow oil. <sup>1</sup>H NMR (400 MHz, CDCl<sub>3</sub>) δ 7.64 – 7.56 (m, 2H), 7.47 – 7.42 (m, 1H), 7.42 – 7.34 (m, 5H), 7.32 – 7.28 (m, 2H), 3.58 (t, *J* = 6.2 Hz, 2H), 3.35 (t, *J* = 13.9 Hz, 2H), 2.55 (t, *J* = 7.2 Hz, 2H), 2.14 – 2.05 (m, 2H); <sup>13</sup>C NMR (101 MHz, CDCl<sub>3</sub>) δ 214.1,

136.4, 132.6, 130.3, 129.4, 129.1, 129.1, 128.2 (t,  $J = 282.8$  Hz), 126.9, 126.4, 114.4, 104.7, 85.0, 43.5, 39.7 (t,  $J = 30.3$  Hz), 30.2, 29.0;  $^{19}\text{F}$  NMR (376 MHz,  $\text{CDCl}_3$ )  $\delta$  -70.95 (AB-t,  $J = 206.8$ , 15.0 Hz, 2F); IR (thin film)  $\nu$  2968, 2210, 1259, 1023, 797, 693  $\text{cm}^{-1}$ ; MS (ESI):  $m/z$  412  $[\text{M}+\text{Na}]^+$ ; HRMS (ESI-TOF):  $m/z$  Calculated for  $\text{C}_{21}\text{H}_{18}\text{NF}_2\text{NaSCl}$   $[\text{M}+\text{Na}]^+$ : 412.0714; Found: 412.0714.

### 2-((1,3-dioxoisindolin-2-yl)methyl)-6,6-difluoro-4-phenyl-6-(phenylthio)hexa-2,3-dienenitrile

e

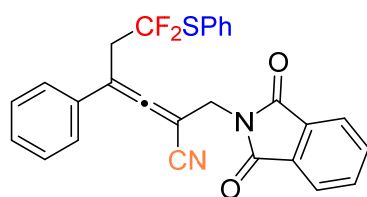

**3x**

The product mixture was purified by silica gel column chromatography (hexane/EtOAc = 10:1) to afford **3x** (28.3 mg, 30%) as yellow waxy solid.  $^1\text{H}$  NMR (400 MHz,  $\text{CDCl}_3$ )  $\delta$  7.88 – 7.81 (m, 2H), 7.77 – 7.69 (m, 2H), 7.53 – 7.49 (m, 2H), 7.43 – 7.39 (m, 1H), 7.39 – 7.33 (m, 4H), 7.33 – 7.28 (m, 3H), 4.68 – 4.51 (m, 2H), 3.32 (td,  $J = 13.5, 5.7$  Hz, 2H);  $^{13}\text{C}$  NMR (101 MHz,  $\text{CDCl}_3$ )  $\delta$  214.1, 167.3, 136.4, 134.4, 131.9, 131.6, 130.2, 129.3, 129.3, 129.1, 127.9 (t,  $J = 282.8$  Hz), 127.1, 126.3, 123.8, 112.8, 107.7, 83.1, 39.5 (t,  $J = 30.3$  Hz), 37.6;  $^{19}\text{F}$  NMR (377 MHz,  $\text{CDCl}_3$ )  $\delta$  -70.91 (td,  $J = 13.6, 2.4$  Hz); IR (thin film)  $\nu$  2961, 2204, 1690, 1259, 1020, 797, 694  $\text{cm}^{-1}$ ; MS (ESI):  $m/z$  473  $[\text{M}+\text{H}]^+$ ; HRMS (ESI-TOF):  $m/z$  Calculated for  $\text{C}_{27}\text{H}_{19}\text{N}_2\text{O}_2\text{F}_2\text{S}$   $[\text{M}+\text{H}]^+$ : 473.1057; Found: 473.1059.

### 6,6-difluoro-2-(2-hydroxyethyl)-4-phenyl-6-(phenylthio)hexa-2,3-dienenitrile

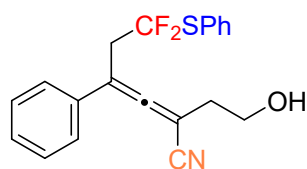

**3y**

The product mixture was purified by silica gel column chromatography (hexane/EtOAc = 5:1) to afford **3y** (59.3 mg, 83%) as yellow oil. **<sup>1</sup>H NMR** (400 MHz, CDCl<sub>3</sub>) δ 7.62 – 7.56 (m, 2H), 7.47 – 7.41 (m, 1H), 7.41 – 7.36 (m, 3H), 7.36 – 7.32 (m, 4H), 3.89 (t, *J* = 6.2 Hz, 2H), 3.37 (t, *J* = 13.4 Hz, 2H), 2.60 (t, *J* = 6.1 Hz, 2H); **<sup>13</sup>C NMR** (101 MHz, CDCl<sub>3</sub>) δ 214.9, 136.4, 132.5, 130.2, 129.3, 129.1, 129.0, 128.3 (t, *J* = 282.8 Hz), 126.9, 126.4, 114.5, 104.3, 83.4, 60.0, 39.6 (t, *J* = 30.3 Hz), 34.8; **<sup>19</sup>F NMR** (376 MHz, CDCl<sub>3</sub>) δ -70.68 (AB-t, *J* = 206.8, 15.0 Hz, 2F); **IR** (thin film) ν 3420, 2951, 2220, 1440, 1258, 1031, 797, 753, 693 cm<sup>-1</sup>; **MS** (ESI): *m/z* 380 [M+Na]<sup>+</sup>; **HRMS** (ESI-TOF): *m/z* Calculated for C<sub>20</sub>H<sub>17</sub>NOF<sub>2</sub>NaS [M+Na]<sup>+</sup>: 380.0897; Found: 380.0899.

#### 2-butyl-6,6-difluoro-4-phenylhexa-2,3-dienitrile (**4a**)

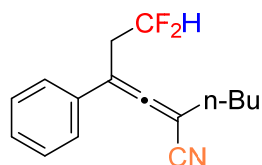

**4a**

The product mixture was purified by silica gel column chromatography (hexane/EtOAc = 20:1) to afford **4a** (46.5 mg, 89 %) as yellow oil. **<sup>1</sup>H NMR** (400 MHz, CDCl<sub>3</sub>) δ 7.43 – 7.31 (m, 5H), 5.97 (tt, *J* = 55.9, 4.6 Hz, 1H), 3.08 (td, *J* = 15.5, 5.2 Hz, 2H), 2.37 – 2.30 (m, 2H), 1.58 (td, *J* = 7.5, 2.0 Hz, 2H), 1.43 – 1.37 (m, 2H), 0.93 (t, *J* = 7.3 Hz, 3H); **<sup>13</sup>C NMR** (101 MHz, CDCl<sub>3</sub>) δ 212.4, 132.4, 129.2, 129.1, 126.5, 115.1 (t, *J* = 242.4 Hz), 114.9, 103.1, 86.7, 35.4 (t, *J* = 20.2 Hz), 31.6, 29.7, 22.1, 13.8; **<sup>19</sup>F NMR** (376 MHz, CDCl<sub>3</sub>) δ -114.87 (dtd, *J* = 56.4, 15.5, 7.0 Hz, 2F); **IR** (thin film) ν 2959, 2214, 1449, 1259, 1021, 797, 695 cm<sup>-1</sup>; **MS** (ESI): *m/z* 284 [M+Na]<sup>+</sup>; **HRMS** (ESI-TOF): *m/z* Calculated for C<sub>16</sub>H<sub>17</sub>NF<sub>2</sub>Na [M+Na]<sup>+</sup>: 284.1227; Found: 284.1231.

#### 2-butyl-6,6-difluoro-4-(p-tolyl)hexa-2,3-dienitrile

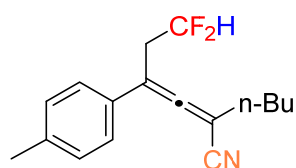

**4b**

The product mixture was purified by silica gel column chromatography (hexane/EtOAc = 20:1) to afford **4b** (48.4 mg, 88 %) as yellow oil. <sup>1</sup>H NMR (400 MHz, CDCl<sub>3</sub>) δ 7.26 – 7.18 (m, 4H), 5.96 (tt, *J* = 56.0, 4.6 Hz, 1H), 3.06 (td, *J* = 15.4, 4.3 Hz, 2H), 2.37 (s, 3H), 2.35 – 2.30 (m, 2H), 1.62 – 1.54 (m, 2H), 1.45 – 1.36 (m, 2H), 0.93 (t, *J* = 7.3 Hz, 3H); <sup>13</sup>C NMR (101 MHz, CDCl<sub>3</sub>) δ 212.4, 139.2, 129.9, 129.3, 126.4, 115.2 (t, *J* = 242.4 Hz), 115.0, 104.2 (t, *J* = 10.1 Hz), 86.4, 35.4 (t, *J* = 20.2 Hz), 31.6, 29.7, 22.1, 21.3, 13.8; <sup>19</sup>F NMR (376 MHz, CDCl<sub>3</sub>) δ -114.83 (dtd, *J* = 56.4, 15.6, 8.3 Hz, 2F); IR (thin film) ν 2960, 2214, 1402, 1259, 1022, 798 cm<sup>-1</sup>; MS (ESI): *m/z* 298 [M+Na]<sup>+</sup>; HRMS (ESI-TOF): *m/z* Calculated for C<sub>17</sub>H<sub>19</sub>NF<sub>2</sub>Na [M+Na]<sup>+</sup>: 298.1383; Found: 298.1387.

#### 2-butyl-6,6-difluoro-4-(*o*-tolyl)hexa-2,3-dienitrile

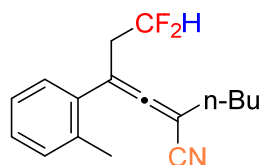

**4c**

The product mixture was purified by silica gel column chromatography (hexane/EtOAc = 20:1) to afford **4c** (49.0 mg, 89 %) as yellow oil. <sup>1</sup>H NMR (400 MHz, CDCl<sub>3</sub>) δ 7.30 – 7.22 (m, 3H), 7.21 – 7.17 (m, 1H), 5.87 (tt, *J* = 55.9, 4.6 Hz, 1H), 2.96 (tdd, *J* = 15.6, 4.6, 2.1 Hz, 2H), 2.38 (s, 3H), 2.29 – 2.23 (m, 2H), 1.60 – 1.51 (m, 2H), 1.40 – 1.33 (m, 2H), 0.92 (t, *J* = 7.3 Hz, 3H); <sup>13</sup>C NMR (101 MHz, CDCl<sub>3</sub>) δ 210.5, 136.0, 133.1, 131.2, 128.8, 127.9, 126.5, 115.0, 114.9 (t, *J* = 242.4 Hz), 102.7 (t, *J* = 10.1 Hz), 83.7, 38.7 (t, *J* = 20.2 Hz), 31.1, 29.7, 21.9, 20.3, 13.8; <sup>19</sup>F NMR (376 MHz, CDCl<sub>3</sub>) δ -115.7 (dt, *J* = 55.9, 15.9 Hz, 2F); IR (thin film) ν 2961, 2214, 1959, 1259, 1022, 797 cm<sup>-1</sup>; MS (ESI): *m/z* 298 [M+Na]<sup>+</sup>; HRMS (ESI-TOF): *m/z* Calculated for C<sub>17</sub>H<sub>19</sub>NF<sub>2</sub>Na [M+Na]<sup>+</sup>: 298.1383; Found: 298.1381.

#### 2-butyl-6,6-difluoro-4-(*m*-tolyl)hexa-2,3-dienitrile

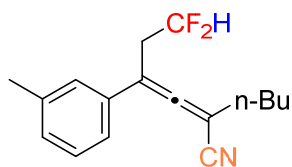

**4d**

The product mixture was purified by silica gel column chromatography (hexane/EtOAc = 20:1) to afford **4d** (50.6 mg, 92 %) as yellow oil. **<sup>1</sup>H NMR** (400 MHz, CDCl<sub>3</sub>) δ 7.31 – 7.24 (m, 1H), 7.21 – 7.13 (m, 1H), 7.13 – 7.08 (m, 2H), 5.95 (tt, *J* = 56.0, 4.6 Hz, 1H), 3.05 (tdd, *J* = 15.7, 4.6, 2.0 Hz, 2H), 2.37 (s, 3H), 2.35 – 2.30 (m, 2H), 1.62 – 1.51 (m, 2H), 1.43 – 1.34 (m, 2H), 0.92 (t, *J* = 7.3 Hz, 3H); **<sup>13</sup>C NMR** (101 MHz, CDCl<sub>3</sub>) δ 212.4, 139.0, 132.3, 129.9, 128.7, 127.3, 123.6, 115.1 (t, *J* = 242.4 Hz), 114.9, 104.3 (t, *J* = 10.1 Hz), 86.4, 35.5 (t, *J* = 20.2 Hz), 31.6, 29.7, 22.0, 21.6, 13.8; **<sup>19</sup>F NMR** (376 MHz, CDCl<sub>3</sub>) δ -114.89 (td, *J* = 56.4, 15.7, 8.3 Hz, 2F); **IR** (thin film) ν 2959, 2219, 1456, 1259, 1021, 797 cm<sup>-1</sup>; **MS** (ESI): *m/z* 298 [M+Na]<sup>+</sup>; **HRMS** (ESI-TOF): *m/z* Calculated for C<sub>17</sub>H<sub>19</sub>NF<sub>2</sub>Na [M+Na]<sup>+</sup>: 298.1383; Found: 298.1387.

**2-butyl-4-(3,5-dimethylphenyl)-6,6-difluorohexa-2,3-dienitrile**

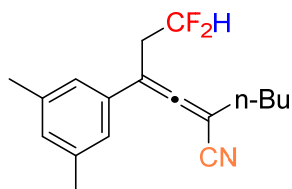

**4e**

The product mixture was purified by silica gel column chromatography (hexane/EtOAc = 20:1) to afford **4e** (54.4 mg, 94 %) as yellow oil. **<sup>1</sup>H NMR** (400 MHz, CDCl<sub>3</sub>) δ 7.02 – 6.91 (m, 3H), 5.96 (tt, *J* = 56.0, 4.6 Hz, 1H), 3.06 (tdd, *J* = 15.7, 4.6, 2.3 Hz, 2H), 2.36 – 2.32 (m, 8H), 1.59 (dtd, *J* = 13.7, 7.1, 2.8 Hz, 2H), 1.47 – 1.37 (m, 2H), 0.94 (t, *J* = 7.3 Hz, 3H); **<sup>13</sup>C NMR** (101 MHz, CDCl<sub>3</sub>) δ 212.4, 138.9, 132.2, 130.8, 124.3, 115.2 (t, *J* = 242.4 Hz), 115.0, 104.4 (t, *J* = 10.1 Hz), 86.2, 35.5 (t, *J* = 20.2 Hz), 31.6, 29.7, 22.0, 21.4, 13.8; **<sup>19</sup>F NMR** (376 MHz, CDCl<sub>3</sub>) δ -114.88 (dtd, *J* = 56.4, 15.6, 9.1 Hz, 2F); **IR** (thin film) ν 2961, 2221, 1404, 1260, 1024, 800 cm<sup>-1</sup>; **MS** (ESI): *m/z* 312 [M+Na]<sup>+</sup>; **HRMS** (ESI-TOF): *m/z* Calculated for C<sub>18</sub>H<sub>21</sub>NF<sub>2</sub>Na [M+Na]<sup>+</sup>: 312.1540; Found: 312.1544.

#### 2-butyl-4-(2-chlorophenyl)-6,6-difluorohexa-2,3-dienitrile

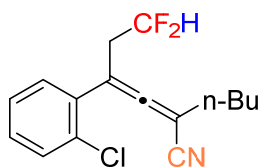

**4g**

The product mixture was purified by silica gel column chromatography (hexane/EtOAc = 20:1) to afford **4g** (31.9 mg, 54 %) as yellow oil. **<sup>1</sup>H NMR** (400 MHz, CDCl<sub>3</sub>) δ 7.45 – 7.40 (m, 1H), 7.32 – 7.25 (m, 3H), 5.89 (tt, *J* = 55.8, 4.5 Hz, 1H), 3.01 (td, *J* = 15.9, 4.5 Hz, 2H), 2.31 – 2.25 (m, 2H), 1.59 – 1.51 (m, 2H), 1.40 – 1.30 (m, 2H), 0.91 (t, *J* = 7.3 Hz, 3H); **<sup>13</sup>C NMR** (101 MHz, CDCl<sub>3</sub>) δ 211.3, 132.8, 132.8, 130.5, 130.2, 130.1, 127.5, 114.9 (t, *J* = 242.4 Hz), 114.8, 102.0 (t, *J* = 10.1 Hz), 84.7, 37.9 (t, *J* = 20.2 Hz), 31.1, 29.6, 21.9, 13.8; **<sup>19</sup>F NMR** (376 MHz, CDCl<sub>3</sub>) δ -115.48 (dtd, *J* = 56.4, 15.8, 10.7 Hz, 2F); **IR** (thin film) ν 2961, 2214, 1429, 1259, 1041, 797 cm<sup>-1</sup>; **MS** (ESI): *m/z* 318 [M+Na]<sup>+</sup>; **HRMS** (ESI-TOF): *m/z* Calculated for C<sub>16</sub>H<sub>16</sub>NF<sub>2</sub>NaCl [M+Na]<sup>+</sup>: 318.0837; Found: 318.0840.

#### 4-(2-bromophenyl)-2-butyl-6,6-difluorohexa-2,3-dienitrile

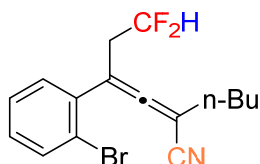

**4h**

The product mixture was purified by silica gel column chromatography (hexane/EtOAc = 20:1) to afford **4h** (48.1 mg, 71 %) as yellow oil. **<sup>1</sup>H NMR** (400 MHz, CDCl<sub>3</sub>) δ 7.56 – 7.54 (m, 1H), 7.30 – 7.26 (m, 1H), 7.22 – 7.12 (m, 2H), 5.83 (tt, *J* = 55.8, 4.5 Hz, 1H), 2.93 (td, *J* = 15.9, 4.5 Hz, 2H), 2.24 – 2.17 (m, 2H), 1.53 – 1.44 (m, 2H), 1.29 (dt, *J* = 14.9, 7.4 Hz, 2H), 0.84 (t, *J* = 7.3 Hz, 3H); **<sup>13</sup>C NMR** (101 MHz, CDCl<sub>3</sub>) δ 210.8, 134.9, 133.7, 130.3, 130.2, 128.0, 122.5, 114.8 (t, *J* = 242.4 Hz), 114.7, 103.7 (t, *J* = 10.1 Hz), 84.8, 38.2 (t, *J* = 20.2 Hz), 31.0, 29.6, 21.9, 13.8; **<sup>19</sup>F NMR** (376 MHz, CDCl<sub>3</sub>) δ -115.43 (dtd, *J* = 56.4, 15.9, 8.8 Hz, 2F); **IR** (thin film) ν 2961, 2221, 1945, 1259, 1021, 797 cm<sup>-1</sup>; **MS** (ESI): *m/z* 362 [M+Na]<sup>+</sup>; **HRMS** (ESI-TOF): *m/z* Calculated for C<sub>16</sub>H<sub>16</sub>NF<sub>2</sub>NaBr [M+Na]<sup>+</sup>: 362.0332; Found: 362.0329.



### 2-butyl-6,6-difluoro-4-(4-fluorophenyl)hexa-2,3-dienitrile

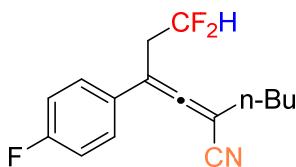

**4i**

The product mixture was purified by silica gel column chromatography (hexane/EtOAc = 20:1) to afford **4i** (48.6 mg, 87 %) as yellow oil.  $^1\text{H NMR}$  (400 MHz,  $\text{CDCl}_3$ )  $\delta$  7.33 – 7.29 (m, 2H), 7.13 – 7.06 (m, 2H), 5.96 (tt,  $J = 55.8, 4.5$  Hz, 1H), 3.05 (td,  $J = 15.6, 4.5$  Hz, 2H), 2.36 – 2.29 (m, 2H), 1.62 – 1.53 (m, 2H), 1.44 – 1.36 (m, 2H), 0.92 (t,  $J = 7.3$  Hz, 3H);  $^{13}\text{C NMR}$  (101 MHz,  $\text{CDCl}_3$ )  $\delta$  212.2, 164.3, 161.8, 128.4, 128.3, 116.2 (d,  $J = 30.3$  Hz), 115.0 (t,  $J = 242.4$  Hz), 114.7, 103.4 (t,  $J = 10.1$  Hz), 86.9, 35.5 (t,  $J = 20.2$  Hz), 31.6, 29.7, 22.0, 13.8;  $^{19}\text{F NMR}$  (376 MHz,  $\text{CDCl}_3$ )  $\delta$  -111.98 (ddd,  $J = 13.2, 8.4, 5.0$  Hz, 1F), -114.87 (dtd,  $J = 56.4, 15.6, 3.7$  Hz, 2F); **IR** (thin film)  $\nu$  2961, 2221, 1504, 1259, 1020, 797  $\text{cm}^{-1}$ ; **MS** (ESI):  $m/z$  302  $[\text{M}+\text{Na}]^+$ ; **HRMS** (ESI-TOF):  $m/z$  Calculated for  $\text{C}_{16}\text{H}_{16}\text{NF}_3\text{Na}$   $[\text{M}+\text{Na}]^+$ : 302.1133; Found: 302.1127.

### 2-butyl-4-(4-chlorophenyl)-6,6-difluorohexa-2,3-dienitrile

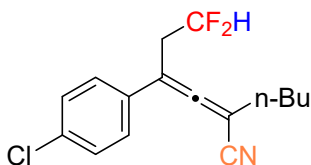

**4j**

The product mixture was purified by silica gel column chromatography (hexane/EtOAc = 20:1) to afford **4j** (31.9 mg, 54 %) as yellow oil.  $^1\text{H NMR}$  (400 MHz,  $\text{CDCl}_3$ )  $\delta$  7.40 – 7.35 (m, 2H), 7.28 – 7.26 (m, 1H), 7.26 – 7.23 (m, 1H), 5.96 (tt,  $J = 55.8, 4.5$  Hz, 1H), 3.05 (td,  $J = 15.6, 4.5$  Hz, 2H), 2.39 – 2.25 (m, 2H), 1.59 – 1.54 (m, 2H), 1.43 – 1.36 (m, 2H), 0.92 (t,  $J = 7.3$  Hz, 3H);  $^{13}\text{C NMR}$  (101 MHz,  $\text{CDCl}_3$ )  $\delta$  212.3, 135.1, 131.0, 129.4, 127.8, 114.9 (t,  $J = 242.4$  Hz), 114.6, 103.5, 87.1, 35.3 (t,  $J = 20.2$  Hz), 31.6, 29.7, 22.0, 13.8;  $^{19}\text{F NMR}$  (376 MHz,  $\text{CDCl}_3$ )  $\delta$  -114.88 (dtd,  $J = 56.4, 15.5, 4.0$  Hz, 2F); **IR** (thin film)  $\nu$  2960, 2217, 1259, 1398, 1020, 797  $\text{cm}^{-1}$ ; **MS** (ESI):  $m/z$

318 [M+Na]<sup>+</sup>; **HRMS** (ESI-TOF): *m/z* Calculated for C<sub>16</sub>H<sub>16</sub>NF<sub>2</sub>NaCl [M+Na]<sup>+</sup>: 318.0837; Found: 318.0832.

**2-butyl-6,6-difluoro-4-(2-methoxyphenyl)hexa-2,3-dienenitrile**

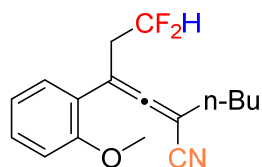

**4k**

The product mixture was purified by silica gel column chromatography (hexane/EtOAc = 20:1) to afford **4k** (42.5 mg, 73 %) as yellow oil. **<sup>1</sup>H NMR** (400 MHz, CDCl<sub>3</sub>) δ 7.44 – 7.30 (m, 1H), 7.20 – 7.09 (m, 1H), 7.03 – 6.85 (m, 2H), 5.90 (tt, *J* = 56.2, 4.6 Hz, 1H), 3.86 (s, 3H), 3.04 (ddt, *J* = 16.8, 15.3, 4.9 Hz, 2H), 2.32 – 2.21 (m, 2H), 1.63 – 1.52 (m, 2H), 1.42 – 1.32 (m, 2H), 0.92 (t, *J* = 7.3 Hz, 3H); **<sup>13</sup>C NMR** (101 MHz, CDCl<sub>3</sub>) δ 212.8, 156.9, 130.4, 129.5, 122.1, 121.0, 115.6, 115.5 (t, *J* = 242.4 Hz), 111.4, 101.5 (t, *J* = 10.1 Hz), 83.1, 55.7, 37.0 (t, *J* = 20.2 Hz), 31.4, 29.7, 22.0, 13.8; **<sup>19</sup>F NMR** (376 MHz, CDCl<sub>3</sub>) δ -115.21 (ddd, *J* = 56.4, 33.8, 18.8 Hz, 2F); **IR** (thin film) ν 2961, 2221, 1969, 1258, 1021, 797 cm<sup>-1</sup>; **MS** (ESI): *m/z* 314 [M+Na]<sup>+</sup>; **HRMS** (ESI-TOF): *m/z* Calculated for C<sub>17</sub>H<sub>19</sub>NOF<sub>2</sub>Na [M+Na]<sup>+</sup>: 314.1332; Found: 314.1335.

**2-butyl-6,6-difluoro-4-(3-(trifluoromethyl)phenyl)hexa-2,3-dienenitrile**

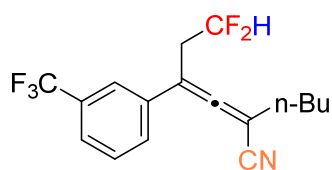

**4l**

The product mixture was purified by silica gel column chromatography (hexane/EtOAc = 20:1) to afford **4l** (59.2 mg, 90 %) as yellow oil. **<sup>1</sup>H NMR** (400 MHz, CDCl<sub>3</sub>) δ 7.62 – 7.60 (m, 1H), 7.57 – 7.47 (m, 3H), 5.99 (tt, *J* = 55.7, 4.4 Hz, 1H), 3.10 (td, *J* = 15.6, 4.4 Hz, 2H), 2.36 (t, *J* = 7.6 Hz, 2H), 1.63 – 1.54 (m, 2H), 1.46 – 1.36 (m, 2H), 0.93 (t, *J* = 7.3 Hz, 3H); **<sup>13</sup>C NMR** (101 MHz, CDCl<sub>3</sub>) δ 212.4, 133.7, 131.9, 131.6, 129.8 (d, *J* = 10.1 Hz), 125.8, 123.8 (q, *J* = 272.7 Hz), 123.2 (d, *J* = 10.1 Hz), 114.8 (t, *J* = 242.4 Hz), 114.4, 103.4 (t, *J* = 10.1 Hz), 87.6, 35.3 (t, *J* = 20.2 Hz),

31.6, 29.6, 22.0, 13.8;  $^{19}\text{F}$  NMR (376 MHz,  $\text{CDCl}_3$ )  $\delta$  -62.85 (s, 3F), -115.01 (dtd, 56.4, 15.0, 3.8, 2F); IR (thin film)  $\nu$  2961, 2221, 1328, 1259, 1020, 797, 697  $\text{cm}^{-1}$ ; MS (ESI):  $m/z$  352  $[\text{M}+\text{Na}]^+$ ; HRMS (ESI-TOF):  $m/z$  Calculated for  $\text{C}_{17}\text{H}_{16}\text{NF}_5\text{Na}$   $[\text{M}+\text{Na}]^+$ : 352.1203; Found: 352.1201.

#### 4-(5-cyano-1,1-difluoronona-3,4-dien-3-yl)benzonitrile

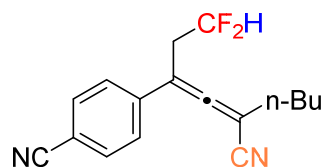

**4m**

The product mixture was purified by silica gel column chromatography (hexane/EtOAc = 20:1) to afford **4m** (34.9 mg, 61 %) as yellow oil.  $^1\text{H}$  NMR (400 MHz,  $\text{CDCl}_3$ )  $\delta$  7.69 (d,  $J$  = 8.1 Hz, 2H), 7.44 (d,  $J$  = 8.0 Hz, 2H), 5.99 (tt,  $J$  = 55.5, 4.4 Hz, 1H), 3.09 (td,  $J$  = 15.7, 4.3 Hz, 2H), 2.36 (t,  $J$  = 7.6 Hz, 2H), 1.63 – 1.55 (m, 2H), 1.44 – 1.34 (m, 2H), 0.92 (t,  $J$  = 7.3 Hz, 3H);  $^{13}\text{C}$  NMR (101 MHz,  $\text{CDCl}_3$ )  $\delta$  213.0, 137.5, 132.9, 127.2, 118.3, 114.7 (t,  $J$  = 242.4 Hz), 114.0, 112.7, 103.2 (t,  $J$  = 10.1 Hz), 87.9, 35.1 (t,  $J$  = 30.3 Hz), 31.5, 29.6, 22.0, 13.7;  $^{19}\text{F}$  NMR (376 MHz,  $\text{CDCl}_3$ )  $\delta$  -114.89 (dtd,  $J$  = 56.4, 15.6, 4.2 Hz, 2F); IR (thin film)  $\nu$  2960, 2221, 1969, 1259, 1019, 797, 695  $\text{cm}^{-1}$ ; MS (ESI):  $m/z$  309  $[\text{M}+\text{Na}]^+$ ; HRMS (ESI-TOF):  $m/z$  Calculated for  $\text{C}_{17}\text{H}_{16}\text{N}_2\text{F}_2\text{Na}$   $[\text{M}+\text{Na}]^+$ : 309.1282; Found: 309.1287.

#### 2-butyl-4-(3-chlorophenyl)-6,6-difluoro-5-methylhexa-2,3-dienenitrile

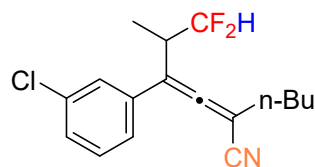

**4p**

The product mixture was purified by silica gel column chromatography (hexane/EtOAc = 20:1) to afford **4p** (53.2 g, 86 %) as yellow oil.  $^1\text{H}$  NMR (400 MHz,  $\text{CDCl}_3$ )  $\delta$  7.36 – 7.27 (m, 3H), 7.24 – 7.17 (m, 1H), 5.76 (tdd,  $J$  = 56.1, 10.0, 3.9 Hz, 1H), 3.26 – 3.08 (m, 1H), 2.33 (td,  $J$  = 7.8, 3.8 Hz, 2H), 1.64 – 1.53 (m, 2H), 1.45 – 1.35 (m, 2H), 1.29 (dd,  $J$  = 10.0, 7.0 Hz, 3H), 0.93 (td,  $J$  = 7.3,

3.2 Hz, 3H);  $^{13}\text{C}$  NMR (101 MHz,  $\text{CDCl}_3$ )  $\delta$  212.1 (d,  $J = 10.1$  Hz), 135.2, 134.9 (d,  $J = 10.1$  Hz), 130.4, 129.0, 127.1, 125.2, 116.7 (td,  $J = 242.4$ , 10.1 Hz), 114.6, 110.2 (dt,  $J = 20.2$ , 4.0 Hz), 88.0 (d,  $J = 10.1$  Hz), 39.2 (td,  $J = 20.2$ , 4.0 Hz), 31.5 (d,  $J = 20.2$  Hz), 29.7 (d,  $J = 10.1$  Hz), 22.0, 13.7, 13.0 - 12.8 (m, 1C);  $^{19}\text{F}$  NMR (376 MHz,  $\text{CDCl}_3$ )  $\delta$  -118.8 – -124.6 (m, 2F). IR (thin film)  $\nu$  2955, 2217, 1580, 1460, 1259, 1073, 795, 691  $\text{cm}^{-1}$ ; MS (ESI):  $m/z$  332  $[\text{M}+\text{Na}]^+$ ; HRMS (ESI-TOF):  $m/z$  Calculated for  $\text{C}_{17}\text{H}_{18}\text{NF}_2\text{NaCl}$   $[\text{M}+\text{Na}]^+$ : 332.0994; Found: 332.1002.

#### 2-butyl-6,6-difluoro-4-(pyridin-3-yl)hexa-2,3-dienitrile

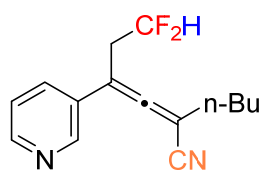

**4q**

The product mixture was purified by silica gel column chromatography (hexane/EtOAc = 20:1) to afford **4q** (32.0 mg, 61 %) as yellow oil.  $^1\text{H}$  NMR (400 MHz,  $\text{CDCl}_3$ )  $\delta$  8.64 – 8.52 (m, 2H), 7.66 – 7.58 (m, 1H), 7.37 – 7.30 (m, 1H), 5.99 (tt,  $J = 55.7$ , 4.4 Hz, 1H), 3.08 (td,  $J = 15.7$ , 4.4 Hz, 2H), 2.38 – 2.27 (m, 2H), 1.62 – 1.52 (m, 2H), 1.43 – 1.34 (m, 2H), 0.92 (t,  $J = 7.3$  Hz, 3H);  $^{13}\text{C}$  NMR (101 MHz,  $\text{CDCl}_3$ )  $\delta$  212.1, 150.0, 147.8, 133.8, 128.8, 123.9, 114.8 (t,  $J = 242.4$  Hz), 114.3, 101.7 (t,  $J = 10.1$  Hz), 87.5, 35.1 (t,  $J = 20.2$  Hz), 31.5, 29.6, 22.0, 13.7;  $^{19}\text{F}$  NMR (376 MHz,  $\text{CDCl}_3$ )  $\delta$  -115.01 (dtd,  $J = 55.6$ , 15.7, 2.9 Hz, 2F); IR (thin film)  $\nu$  2962, 2217, 1259, 1085, 1016, 797  $\text{cm}^{-1}$ ; MS (ESI):  $m/z$  263  $[\text{M}+\text{H}]^+$ ; HRMS (ESI-TOF):  $m/z$  Calculated for  $\text{C}_{15}\text{H}_{17}\text{N}_2\text{F}_2$   $[\text{M}+\text{H}]^+$ : 263.1360; Found: 263.1365.

#### 2-(4,4-difluoro-2-phenylbut-1-en-1-ylidene)octanenitrile

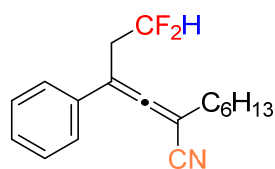

**4r**

The product mixture was purified by silica gel column chromatography (hexane/EtOAc = 20:1) to afford **4r** (43.4 g, 75 %) as yellow oil.  $^1\text{H}$  NMR (400 MHz,  $\text{CDCl}_3$ )  $\delta$  7.50 – 7.27 (m, 5H), 5.97 (tt,  $J = 55.9$ , 4.6 Hz, 1H), 3.17 – 2.98 (m, 2H), 2.33 (t,  $J = 7.6$  Hz, 2H), 1.68 – 1.53 (m, 2H), 1.36 (t,  $J$

= 5.4 Hz, 2H), 1.29 – 1.24 (m, 4H), 0.91 – 0.84 (m, 3H);  $^{13}\text{C}$  NMR (101 MHz,  $\text{CDCl}_3$ )  $\delta$  212.4, 132.4, 129.2, 129.0, 126.6, 115.1 (t,  $J = 242.4$  Hz), 114.8, 104.2 (t,  $J = 10.1$  Hz), 86.6, 35.4 (t,  $J = 20.2$  Hz), 31.9, 31.5, 28.6, 27.6, 22.6, 14.0;  $^{19}\text{F}$  NMR (376 MHz,  $\text{CDCl}_3$ )  $\delta$  -114.86 (dtd,  $J = 55.7$ , 15.6, 6.7 Hz, 2F); IR (thin film)  $\nu$  2959, 2217, 1952, 1259, 1019, 797, 694  $\text{cm}^{-1}$ ; MS (ESI):  $m/z$  312  $[\text{M}+\text{Na}]^+$ ; HRMS (ESI-TOF):  $m/z$  Calculated for  $\text{C}_{18}\text{H}_{21}\text{NF}_2\text{Na}$   $[\text{M}+\text{Na}]^+$ : 312.1540; Found: 312.1534.

#### 2-(tert-butyl)-6,6-difluoro-4-phenylhexa-2,3-dienenitrile

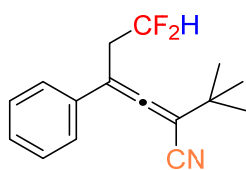

#### 4s

The product mixture was purified by silica gel column chromatography (hexane/EtOAc = 20:1) to afford **4s** (44.4 g, 85 %) as yellow oil.  $^1\text{H}$  NMR (400 MHz,  $\text{CDCl}_3$ )  $\delta$  7.43 – 7.37 (m, 2H), 7.39 – 7.29 (m, 3H), 5.99 (tt,  $J = 55.8$ , 4.6 Hz, 1H), 3.16 – 3.04 (m, 2H), 1.26 (s, 9H);  $^{13}\text{C}$  NMR (101 MHz,  $\text{CDCl}_3$ )  $\delta$  210.0, 132.5, 129.2, 129.0, 126.3, 115.1 (t,  $J = 242.4$  Hz), 113.9, 105.2, 97.7, 35.7, 35.4 (t,  $J = 20.2$  Hz), 28.8;  $^{19}\text{F}$  NMR (376 MHz,  $\text{CDCl}_3$ )  $\delta$  -114.37 (dtd,  $J = 56.4$ , 15.4, 2.9 Hz, 2F). IR (thin film)  $\nu$  2961, 2217, 1401, 1259, 1020, 798  $\text{cm}^{-1}$ ; MS (ESI):  $m/z$  284  $[\text{M}+\text{Na}]^+$ ; HRMS (ESI-TOF):  $m/z$  Calculated for  $\text{C}_{16}\text{H}_{17}\text{NF}_2\text{Na}$   $[\text{M}+\text{Na}]^+$ : 284.1227; Found: 284.1226.

#### 2-cyclopropyl-6,6-difluoro-4-phenylhexa-2,3-dienenitrile

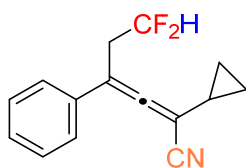

#### 4t

The product mixture was purified by silica gel column chromatography (hexane/EtOAc = 20:1) to afford **4t** (44.4 g, 50 %) as yellow oil.  $^1\text{H}$  NMR (400 MHz,  $\text{CDCl}_3$ )  $\delta$  7.44 – 7.38 (m, 2H), 7.38 – 7.30 (m, 3H), 5.96 (tt,  $J = 55.9$ , 4.6 Hz, 1H), 3.20 – 2.93 (m, 2H), 1.56 (td,  $J = 8.2$ , 4.9 Hz, 1H), 0.94 – 0.87 (m, 2H), 0.78 – 0.68 (m, 2H);  $^{13}\text{C}$  NMR (101 MHz,  $\text{CDCl}_3$ )  $\delta$  211.8, 132.4, 129.2, 129.2, 126.6, 115.1 (t,  $J = 242.4$  Hz), 113.8, 105.8, 90.3, 35.5 (t,  $J = 20.2$  Hz), 11.7, 6.7, 6.6;

$^{19}\text{F}$  NMR (376 MHz,  $\text{CDCl}_3$ )  $\delta$  -114.94 (dtd,  $J = 56.0, 15.4, 3.0$  Hz). IR (thin film)  $\nu$  2963, 2215, 1411, 1261, 1018, 797  $\text{cm}^{-1}$ ; MS (ESI):  $m/z$  268  $[\text{M}+\text{Na}]^+$ ; HRMS (ESI-TOF):  $m/z$  Calculated for  $\text{C}_{15}\text{H}_{13}\text{NF}_2\text{Na}$   $[\text{M}+\text{Na}]^+$ : 268.1017; Found: 268.1016.

#### 2-cyclohexyl-6,6-difluoro-4-phenylhexa-2,3-dienitrile

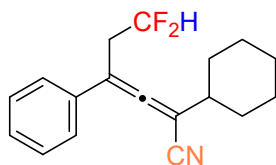

**4v**

The product mixture was purified by silica gel column chromatography (hexane/EtOAc = 20:1) to afford **4v** (47.7 g, 83 %) as yellow oil.  $^1\text{H}$  NMR (400 MHz,  $\text{CDCl}_3$ )  $\delta$  7.45 – 7.37 (m, 2H), 7.37 – 7.29 (m, 3H), 5.98 (tt,  $J = 55.9, 4.6$  Hz, 1H), 3.08 (tt,  $J = 15.2, 4.2$  Hz, 2H), 2.32 – 2.23 (m, 1H), 2.02 – 1.93 (m, 2H), 1.84 – 1.75 (m, 2H), 1.73 – 1.66 (m, 1H), 1.61 – 1.56 (m, 1H), 1.33 – 1.25 (m, 4H);  $^{13}\text{C}$  NMR (101 MHz,  $\text{CDCl}_3$ )  $\delta$  211.4, 132.5, 129.2, 129.0, 126.4, 115.2 (t,  $J = 242.4$  Hz), 114.3, 105.1 (t,  $J = 10.1$  Hz), 92.4, 40.5, 35.4 (t,  $J = 20.2$  Hz), 31.6, 25.9, 25.6;  $^{19}\text{F}$  NMR (376 MHz,  $\text{CDCl}_3$ )  $\delta$  -114.50 (dq,  $J = 56.1, 16.1$  Hz, 2F); IR (thin film)  $\nu$  2929, 2214, 1942, 1448, 1056, 762, 693  $\text{cm}^{-1}$ ; MS (ESI):  $m/z$  310  $[\text{M}+\text{Na}]^+$ ; HRMS (ESI-TOF):  $m/z$  Calculated for  $\text{C}_{18}\text{H}_{19}\text{NF}_2\text{Na}$   $[\text{M}+\text{Na}]^+$ : 310.1383; Found: 310.1387.

#### 2-(3-chloropropyl)-6,6-difluoro-4-phenylhexa-2,3-dienitrile

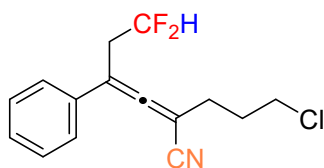

**4w**

The product mixture was purified by silica gel column chromatography (hexane/EtOAc = 20:1) to afford **4w** (49.5 g, 88 %) as yellow oil.  $^1\text{H}$  NMR (400 MHz,  $\text{CDCl}_3$ )  $\delta$  7.45 – 7.30 (m, 5H), 5.99 (tt,  $J = 55.8, 4.5$  Hz, 1H), 3.60 (t,  $J = 6.2$  Hz, 2H), 3.19 – 3.01 (m, 2H), 2.58 – 2.49 (m, 2H), 2.12 – 2.02 (m, 2H);  $^{13}\text{C}$  NMR (101 MHz,  $\text{CDCl}_3$ )  $\delta$  212.6, 132.1, 129.3, 128.5, 126.6, 115.0 (t,  $J = 242.4$  Hz), 114.4, 105.1, 85.2, 43.5, 35.4 (t,  $J = 20.2$  Hz), 30.0, 29.1;  $^{19}\text{F}$  NMR (376 MHz,  $\text{CDCl}_3$ )

$\delta$  -114.91 (dtd,  $J$  = 55.7, 15.7, 7.1 Hz, 2F); **IR** (thin film)  $\nu$  2958, 2228, 1259, 1024, 797, 698  $\text{cm}^{-1}$ ; **MS** (ESI):  $m/z$  304  $[\text{M}+\text{Na}]^+$ ; **HRMS** (ESI-TOF):  $m/z$  Calculated for  $\text{C}_{15}\text{H}_{14}\text{NF}_2\text{NaCl}$   $[\text{M}+\text{Na}]^+$ : 304.0681; Found: 304.0685.

#### 2-((1,3-dioxoisindolin-2-yl)methyl)-6,6-difluoro-4-phenylhexa-2,3-dienitrile

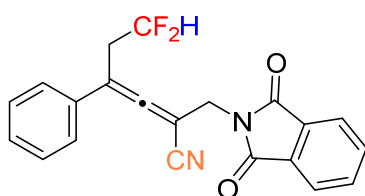

**4x**

The product mixture was purified by silica gel column chromatography (hexane/EtOAc = 20:1) to afford **4x** (24.0 mg, 33 %) as yellow waxy solid.  **$^1\text{H}$  NMR** (400 MHz,  $\text{CDCl}_3$ )  $\delta$  7.88 – 7.83 (m, 2H), 7.77 – 7.67 (m, 3H), 7.42 – 7.33 (m, 3H), 7.29 – 7.27 (m, 1H), 5.94 (tt,  $J$  = 55.8, 4.6 Hz, 1H), 4.57 (s, 2H), 3.04 (td,  $J$  = 15.5, 15.0, 5.1 Hz, 2H);  **$^{13}\text{C}$  NMR** (101 MHz,  $\text{CDCl}_3$ )  $\delta$  212.5, 167.3, 134.6, 131.8, 131.1, 129.6, 129.2, 126.8, 123.8, 114.8 (t,  $J$  = 242.4 Hz), 112.4, 108.2, 83.4, 37.7, 35.3 (t,  $J$  = 20.2 Hz);  **$^{19}\text{F}$  NMR** (377 MHz,  $\text{CDCl}_3$ )  $\delta$  -115.09 (dt,  $J$  = 56.4, 15.4 Hz, 2F); **IR** (thin film)  $\nu$  2958, 2228, 1679, 1259, 1024, 797, 698  $\text{cm}^{-1}$ ; **MS** (ESI):  $m/z$  365  $[\text{M}+\text{H}]^+$ ; **HRMS** (ESI-TOF):  $m/z$  Calculated for  $\text{C}_{21}\text{H}_{15}\text{N}_2\text{O}_2\text{F}_2$   $[\text{M}+\text{H}]^+$ : 365.1023; Found: 365.1025.

#### 6,6-difluoro-2-(2-hydroxyethyl)-4-phenylhexa-2,3-dienitrile

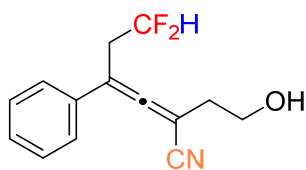

**4y**

The product mixture was purified by silica gel column chromatography (hexane/EtOAc = 20:1) to afford **4y** (35.4 mg, 71 %) as yellow oil.  **$^1\text{H}$  NMR** (400 MHz,  $\text{CDCl}_3$ )  $\delta$  7.45 – 7.32 (m, 5H), 6.04 (tt,  $J$  = 55.9, 4.5 Hz, 1H), 3.88 (t,  $J$  = 5.9 Hz, 2H), 3.09 (td,  $J$  = 15.6, 15.1, 4.6 Hz, 2H), 2.56 (t,  $J$  = 6.0 Hz, 2H);  **$^{13}\text{C}$  NMR** (101 MHz,  $\text{CDCl}_3$ )  $\delta$  212.3, 131.0, 128.1, 128.1, 125.5, 114.0 (t,  $J$  = 242.4 Hz), 113.4, 103.5 (t,  $J$  = 10.1 Hz), 82.6, 58.7, 34.1 (t,  $J$  = 20.2 Hz), 33.8;  **$^{19}\text{F}$  NMR** (376 MHz,

CDCl<sub>3</sub>)  $\delta$  -115.04 (dtd,  $J$  = 55.7, 15.7, 3.8 Hz, 2F); **IR** (thin film)  $\nu$  2960, 2214, 1259, 1020, 797, 695 cm<sup>-1</sup>; **MS** (ESI):  $m/z$  250 [M+H]<sup>+</sup>; **HRMS** (ESI-TOF):  $m/z$  Calculated for C<sub>14</sub>H<sub>14</sub>NOF<sub>2</sub> [M+H]<sup>+</sup>: 250.1043; Found: 250.1040.

## 5. Transformation of difluoroalkylated allenes

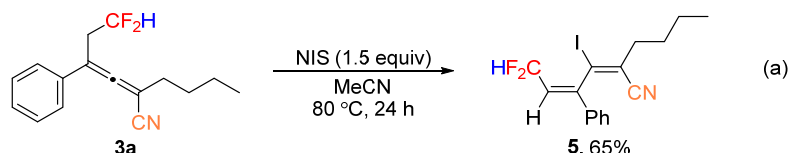

In an 8 mL screw-cap vial was charged with allene (**3a**, 52.2 mg, 0.2 mmol), NIS (67.5 mg, 0.3 mmol) and CH<sub>3</sub>CN (2.0 mL). The resulting suspension was stirred at 80 °C for 24 h. Upon completion of the reaction as monitored by TLC, the solvent was concentrated under vacuum. The product mixture was purified by silica gel column chromatography (hexane/EtOAc = 30:1) to afford **5** (50.3 mg, 65%) as yellow oil. <sup>1</sup>H NMR (400 MHz, CDCl<sub>3</sub>)  $\delta$  7.47 – 7.36 (m, 5H), 6.31 (tdd,  $J$  = 54.8, 11.6, 7.0 Hz, 1H), 6.07 (td,  $J$  = 8.4, 6.7 Hz, 1H), 2.67 – 2.54 (m, 1H), 2.26 – 2.17 (m, 1H), 1.78 – 1.65 (m, 1H), 1.52 – 1.44 (m, 1H), 1.02 (t,  $J$  = 7.3 Hz, 2H), 0.85 (t,  $J$  = 7.3 Hz, 3H); <sup>13</sup>C NMR (101 MHz, CDCl<sub>3</sub>)  $\delta$  148.5 (d,  $J$  = 20.2 Hz), 133.6, 130.6, 130.3, 129.4, 129.2, 127.0, 126.6, 121.3, 119.5, 112.0 (t,  $J$  = 242.4 Hz), 38.9, 33.7, 29.6 (d,  $J$  = 50.5 Hz), 22.2, 13.8 (d,  $J$  = 30.3 Hz); <sup>19</sup>F NMR (376 MHz, CDCl<sub>3</sub>)  $\delta$  -111.05 (ddd,  $J$  = 54.7, 15.3, 8.1 Hz, 2F); **IR** (thin film)  $\nu$  2960, 2214, 1259, 1083, 1020, 797, 696 cm<sup>-1</sup>; **MS** (ESI):  $m/z$  388 [M+H]<sup>+</sup>; **HRMS** (ESI-TOF):  $m/z$  Calculated for C<sub>16</sub>H<sub>17</sub>NF<sub>2</sub>I [M+H]<sup>+</sup>: 388.0374; Found: 388.0370.

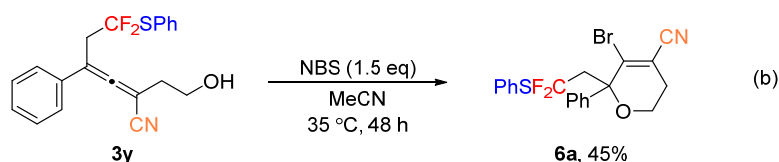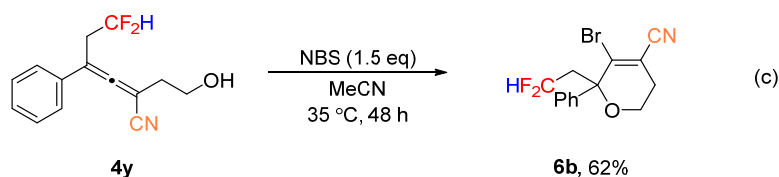



In an 8 mL screw-cap vial was charged with allene (**3y**, 71.4 mg, 0.2 mmol), NBS (53.4 mg, 0.3 mmol) and CH<sub>3</sub>CN (2.0 mL). The resulting suspension was stirred at 35 °C for 24 h. Upon completion of the reaction as monitored by TLC, the solvent was concentrated under vacuum. The product mixture was purified by silica gel column chromatography (hexane/EtOAc = 5:1) to afford **6a** (39.2 mg, 45%) as yellow oil. <sup>1</sup>H NMR (400 MHz, CDCl<sub>3</sub>) δ 7.66 – 7.57 (m, 2H), 7.49 – 7.36 (m, 8H), 4.12 (q, *J* = 7.2 Hz, 1H), 3.84 (ddd, *J* = 12.0, 6.0, 2.0 Hz, 1H), 3.48 (ddd, *J* = 12.0, 10.4, 3.7 Hz, 1H), 3.23 – 3.17 (m, 1H), 2.81 (ddd, *J* = 16.7, 10.4, 6.0 Hz, 1H), 2.30 (ddd, *J* = 17.0, 3.8, 2.0 Hz, 1H); <sup>13</sup>C NMR (101 MHz, CDCl<sub>3</sub>) δ 139.8, 139.4, 136.7, 130.1, 129.2, 129.1, 128.8, 127.7 (t, *J* = 282.8 Hz), 127.5, 117.0, 116.0, 81.0, 58.2, 53.6, 47.3 (t, *J* = 20.2 Hz), 30.0; <sup>19</sup>F NMR (376 MHz, CDCl<sub>3</sub>) δ -68.10 (AB-t, *J* = 206.8, 15.0 Hz, 2F); IR (thin film) ν 2960, 2214, 1956, 1259, 1020, 797, 695 cm<sup>-1</sup>; MS (ESI): *m/z* 458 [M+Na]<sup>+</sup>; HRMS (ESI-TOF): *m/z* Calculated for C<sub>20</sub>H<sub>16</sub>NOF<sub>2</sub>SNaBr [M+Na]<sup>+</sup>: 458.0104; Found: 458.0107.

In an 8 mL screw-cap vial was charged with allene (**4y**, 49.8 mg, 0.2 mmol), NBS (53.4 mg, 0.3 mmol) and CH<sub>3</sub>CN (2.0 mL). The resulting suspension was stirred at 35 °C for 24 h. Upon completion of the reaction as monitored by TLC, the solvent was concentrated under vacuum. The product mixture was purified by silica gel column chromatography (hexane/EtOAc = 5:1) to afford **6b** (40.6 mg, 62%) as yellow oil. <sup>1</sup>H NMR (400 MHz, CDCl<sub>3</sub>) δ 7.50 – 7.45 (m, 2H), 7.44 – 7.36 (m, 3H), 6.07 (tt, *J* = 56.0, 4.7 Hz, 1H), 4.12 (q, *J* = 7.1 Hz, 1H), 3.80 (ddd, *J* = 12.1, 6.0, 2.4 Hz, 1H), 3.53 (ddd, *J* = 12.1, 10.0, 4.0 Hz, 1H), 2.86 (dd, *J* = 4.5, 2.1 Hz, 1H), 2.71 (ddd, *J* = 17.3, 10.0, 6.0 Hz, 1H), 2.36 (ddd, *J* = 17.3, 4.0, 2.4 Hz, 1H); <sup>13</sup>C NMR (101 MHz, CDCl<sub>3</sub>) δ 139.9, 138.9, 129.3, 128.9, 127.5, 116.9, 116.4, 115.0 (t, *J* = 242.4 Hz), 80.5 (t, *J* = 10.1 Hz), 58.1, 43.5 (t, *J* = 20.2 Hz), 30.2; <sup>19</sup>F NMR (376 MHz, CDCl<sub>3</sub>) δ -113.36 (ddt, *J* = 56.4, 15.0, 3.8 Hz, 2F); IR (thin film) ν 2922, 2214, 1463, 1259, 1084, 1020, 797 cm<sup>-1</sup>; MS (ESI): *m/z* 350 [M+Na]<sup>+</sup>; HRMS (ESI-TOF): *m/z* Calculated for C<sub>14</sub>H<sub>12</sub>NOF<sub>2</sub>NaBr [M+Na]<sup>+</sup>: 349.9968; Found: 349.9962.

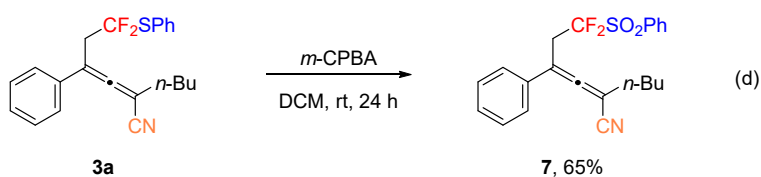

In an 8 mL screw-cap vial was charged with allene (**3a**, 52.2 mg, 0.2 mmol), *m*-CPBA (103.5 mg, 0.6 mmol) and DCM (2.0 mL). The resulting suspension was stirred at room temperature for 24 h. Upon completion of the reaction as monitored by TLC, the solvent was concentrated under vacuum. The product mixture was purified by silica gel column chromatography (hexane/EtOAc = 10:1) to afford **7** (52.1 mg, 65%) as yellow oil. <sup>1</sup>H NMR (400 MHz, CDCl<sub>3</sub>) δ 8.01 – 8.00 (m, 2H), 7.80 – 7.77 (m, 1H), 7.66 – 7.62 (m, 2H), 7.42 – 7.34 (m, 5H), 3.62 (t, *J* = 16.0 Hz, 2H), 2.32 (t, *J* = 7.3 Hz, 2H), 1.61 – 1.52 (m, 2H), 1.40 – 1.34 (m, 2H), 0.90 (t, *J* = 7.3 Hz, 3H); <sup>13</sup>C NMR (101 MHz, CDCl<sub>3</sub>) δ 213.6, 135.8, 132.4, 131.7, 131.0, 129.6, 129.1, 129.1, 126.8, 122.8 (t, *J* = 282.8 Hz), 114.5, 101.6, 86.7, 31.5, 30.4 (t, *J* = 20.2 Hz), 29.6, 22.0, 13.7; <sup>19</sup>F NMR (376 MHz, CDCl<sub>3</sub>) δ -102.85 (t, *J* = 17.9 Hz, 2F); IR (thin film) ν 2960, 2214, 1259, 1086, 1019, 797, 690 cm<sup>-1</sup>; MS (ESI): *m/z* 424 [M+Na]<sup>+</sup>; HRMS (ESI-TOF): *m/z* Calculated for C<sub>22</sub>H<sub>21</sub>NO<sub>2</sub>F<sub>2</sub>SNa [M+Na]<sup>+</sup>: 424.1159; Found: 424.1156.

## 6. Mechanistic Studies

### Radical Inhibition Experiment

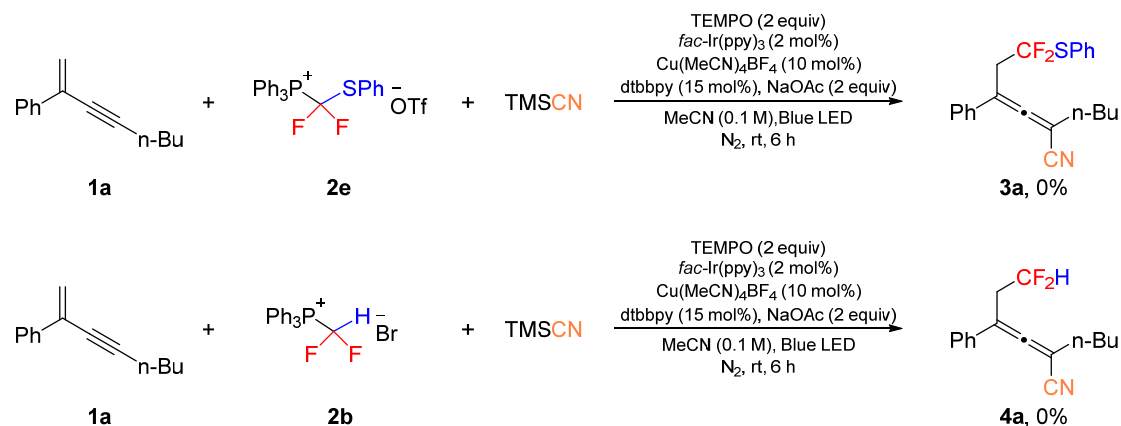

### Radical Clock Experiment

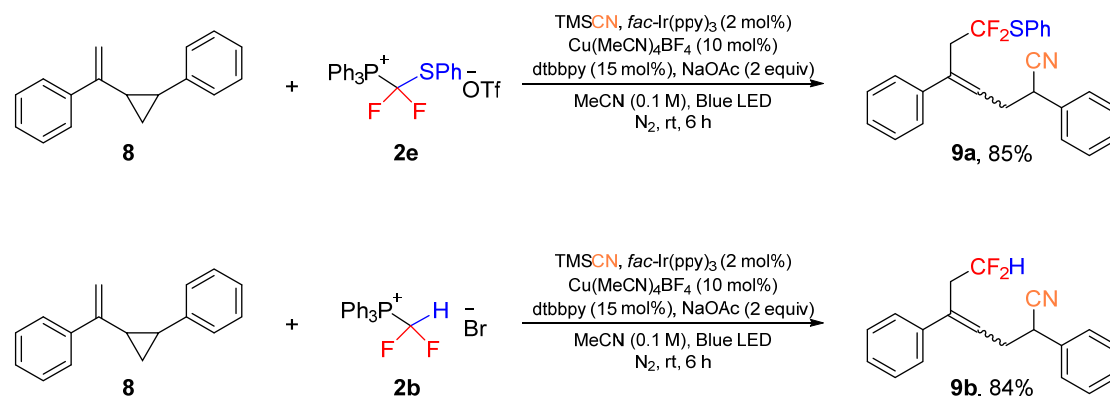

An 8 mL screw-cap vial equipped with a magnetic stir bar was charged with *fac*-Ir(ppy)<sub>3</sub> (2.6 mg, 0.004 mmol), 4,4'-di-tert-butyl-2,2'-bipyridine (8.0 mg, 0.03 mmol), Ph<sub>3</sub>PCF<sub>2</sub>SPhOTf (114.0 mg, 0.2 mmol), Cu(MeCN)<sub>4</sub>BF<sub>4</sub> (6.3 mg, 0.02 mmol) and sodium acetate (32.8 mg, 0.4 mmol). The vial was evacuated and backfilled with nitrogen for three times. Then, MeCN (2.0 mL), TMSCN (50 μL, 0.4 mmol) and **8** (44.0 mg, 0.2 mmol) were added via a syringe. The reaction mixture was placed at a distance of 10 cm from a 40 W blue LEDs and stirred at room temperature for 6h. Then, saturated NaCl aqueous solution was added and the reaction mixture was extracted with ethyl acetate. The combined organic layers were then dried over Na<sub>2</sub>SO<sub>4</sub>, filtered, and concentrated under reduced pressure. The residue was purified by silica gel column

chromatography to give the desired product **9a** (68.9 mg, 85%) as yellow oil. **<sup>1</sup>H NMR** (400 MHz, CDCl<sub>3</sub>) δ 7.46 – 7.40 (m, 2H), 7.34 – 7.28 (m, 2H), 7.27 – 7.12 (m, 9H), 6.96 – 6.91 (m, 2H), 5.70 (t, *J* = 7.4 Hz, 1H), 3.73 (t, *J* = 7.1 Hz, 1H), 3.12 (t, *J* = 14.2 Hz, 2H), 2.53 (t, *J* = 7.3 Hz, 2H); **<sup>13</sup>C NMR** (101 MHz, CDCl<sub>3</sub>) δ 139.0, 136.9 (t, *J* = 10.1 Hz), 136.2, 135.0, 129.8, 129.1, 129.0, 128.5, 128.4, 128.3, 128.3 (t, *J* = 282.8 Hz), 127.5, 127.0, 120.4, 48.1 (t, *J* = 20.2 Hz), 37.4, 35.2, 29.8, 14.3; **<sup>19</sup>F NMR** (376 MHz, CDCl<sub>3</sub>) δ -69.89 (t, *J* = 14.2 Hz, 2F); **IR** (thin film) ν 2961, 2214, 1259, 1021, 1019, 797, 697 cm<sup>-1</sup>; **MS** (ESI): *m/z* 428 [M+Na]<sup>+</sup>; **HRMS** (ESI-TOF): *m/z* Calculated for C<sub>25</sub>H<sub>21</sub>NF<sub>2</sub>NaS [M+Na]<sup>+</sup>: 428.1260; Found: 428.1264.

**9b** (49.9 mg, 84%), yellow oil. **<sup>1</sup>H NMR** (400 MHz, CDCl<sub>3</sub>) δ 7.30 – 7.21 (m, 6H), 7.16 – 7.12 (m, 2H), 6.91 – 6.83 (m, 2H), 5.62 (t, *J* = 7.4 Hz, 1H), 5.56 (t, *J* = 4.9 Hz, 1H), 3.72 (t, *J* = 7.1 Hz, 1H), 2.79 (td, *J* = 16.3, 4.9 Hz, 2H), 2.48 (t, *J* = 7.2 Hz, 2H); **<sup>13</sup>C NMR** (101 MHz, CDCl<sub>3</sub>) δ 138.6, 137.5 (t, *J* = 10.1 Hz), 135.0, 129.1, 128.7, 128.3, 128.1, 127.8, 127.5, 126.5, 120.4, 115.5 (t, *J* = 242.4 Hz), 44.2 (t, *J* = 20.2 Hz), 37.4, 35.0; **<sup>19</sup>F NMR** (376 MHz, CDCl<sub>3</sub>) δ -115.98 (dt, *J* = 56.4, 16.3 Hz, 2F); **IR** (thin film) ν 2922, 2214, 1259, 1021, 797, 699 cm<sup>-1</sup>; **MS** (ESI): *m/z* 320 [M+Na]<sup>+</sup>; **HRMS** (ESI-TOF): *m/z* Calculated for C<sub>19</sub>H<sub>17</sub>NF<sub>2</sub>Na [M+Na]<sup>+</sup>: 320.1227; Found: 320.1228.

## 7. References

1. Y. L. Song, C. L. Fu and S. M. Ma, *ACS Catal.*, 2021, **11**, 10007-10013.
2. L. H. Wang, R. Y. Ma, J. Q. Sun, G. F. Zheng and Q. Zhang, *Chem. Sci.*, 2022, **13**, 3169-3175.
3. H. Y. Chen, J. Zhang and D. Z. Wang, *Org. Lett.*, 2015, **17**, 2098-2101.
4. M. Taj Muhammad, Y. H. Jiao, C. Q. Ye, M. F. Chiou, M. Israr, X. T. Zhu, Y. J. Li, Z. H. Wen, A. Studer and H. L. Bao, *Nat. Commun.*, 2020, **11**, 8.
5. S. Liu, Y. G. Huang, F. L. Qing and X. H. Xu, *Eur. J. Org. Chem.*, 2023, **26**, 5.
6. H. Y. Chen, X. R. Shao, H. F. Wang and H. B. Zhai, *Org. Chem. Front.*, 2017, **4**, 409-412.
7. X. Y. Dong, T. Y. Zhan, S. P. Jiang, X. D. Liu, L. Ye, Z. L. Li, Q. S. Gu and X. Y. Liu, *Angew. Chem. Int. Ed.*, 2021, **60**, 2160-2164.
8. F. L. Sun, J. Ni, G. J. Cheng and X. J. Fang, *Chem. Eur. J.*, 2020, **26**, 5956-5960.
9. Q. Zhang, M. T. Muhammad, M. F. Chiou, Y. H. Jiao, H. L. Bao and Y. J. Li, *Org. Lett.*, 2020, **22**, 5261-5265.
10. L. Chen, C. Lin, S. M. Zhang, X. J. Zhang, J. M. Zhang, L. J. Xing, Y. G. Guo, J. Feng, J. Gao and D. Du, *ACS Catal.*, 2021, **11**, 13363-13373.
11. X. T. Zhu, W. L. Deng, M. F. Chiou, C. Q. Ye, W. J. Jian, Y. H. Zeng, Y. H. Jiao, L. Ge, Y. J. Li, X. H. Zhang and H. L. Bao, *J. Am. Chem. Soc.*, 2019, **141**, 548-559.
12. (a) Y. Y. Zhu, S. Liu, Y. E. Huang, F. L. Qing and X. H. Xu, *J. Fluor. Chem.*, 2022, **257**, 10;  
(b) A. L. Trifonov, L. I. Panferova, V. V. Levin, A. D. Volodin, A. A. Korlyukov and A. D. Dilman, *J. Fluor. Chem.*, 2019, **220**, 78-82.
13. N. B. Heine and A. Studer, *Org. Lett.*, 2017, **19**, 4150-4153.
14. T. Besset, P. Jubault, X. Pannecoucke and T. Poisson, *Org. Chem. Front.*, 2016, **3**, 1004-1010.

## 8. Copies of $^1\text{H}$ , $^{19}\text{F}$ , and $^{13}\text{C}$ NMR Spectra for the Products

$^1\text{H}$  NMR (400 MHz,  $\text{CDCl}_3$ )

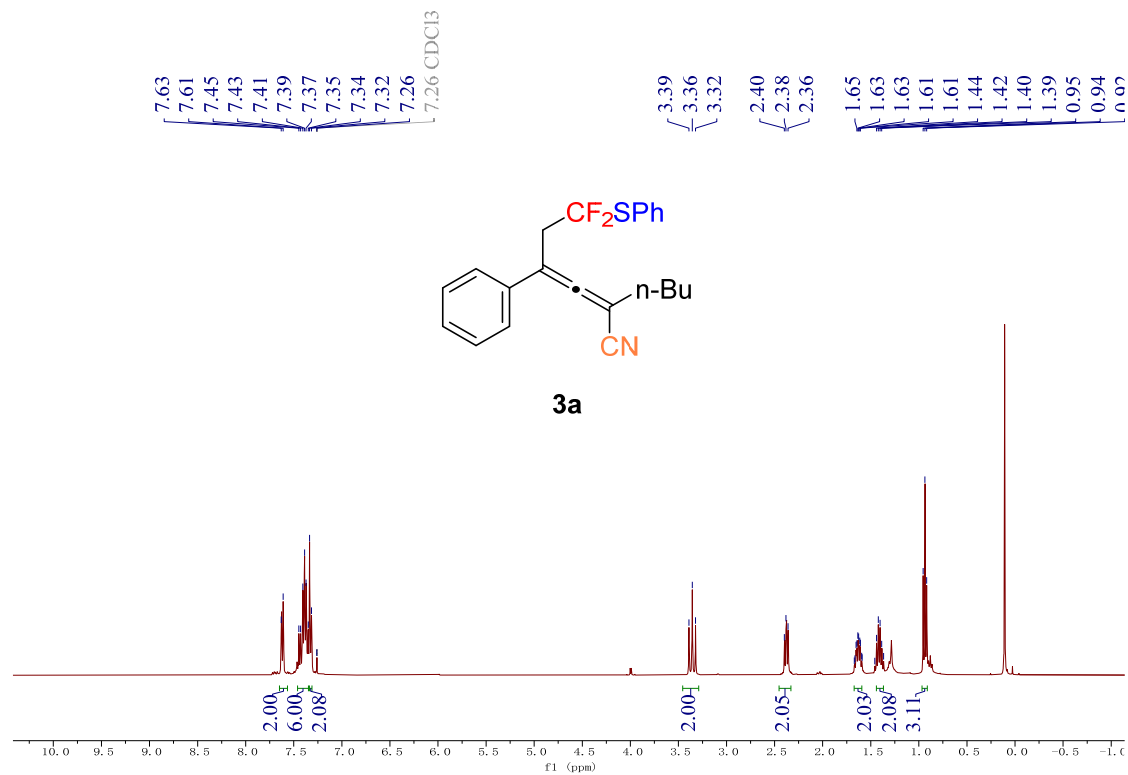

$^{13}\text{C}$  NMR (101 MHz,  $\text{CDCl}_3$ )

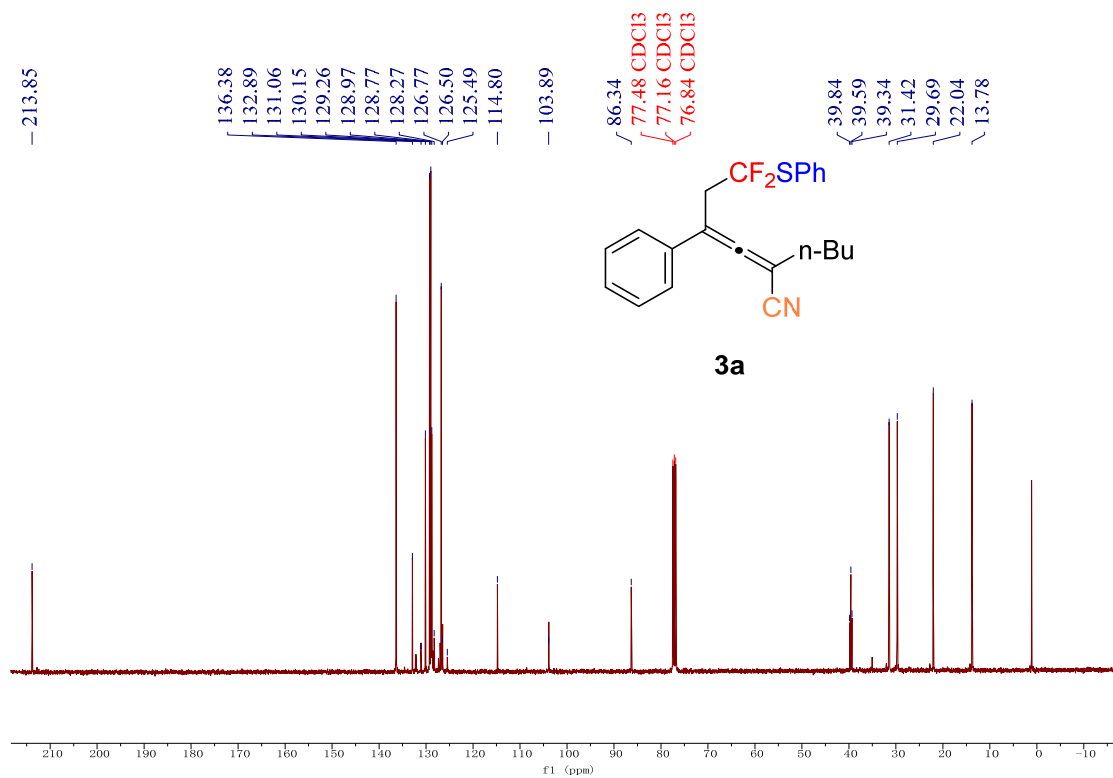

**<sup>19</sup>F NMR (376 MHz, CDCl<sub>3</sub>)**

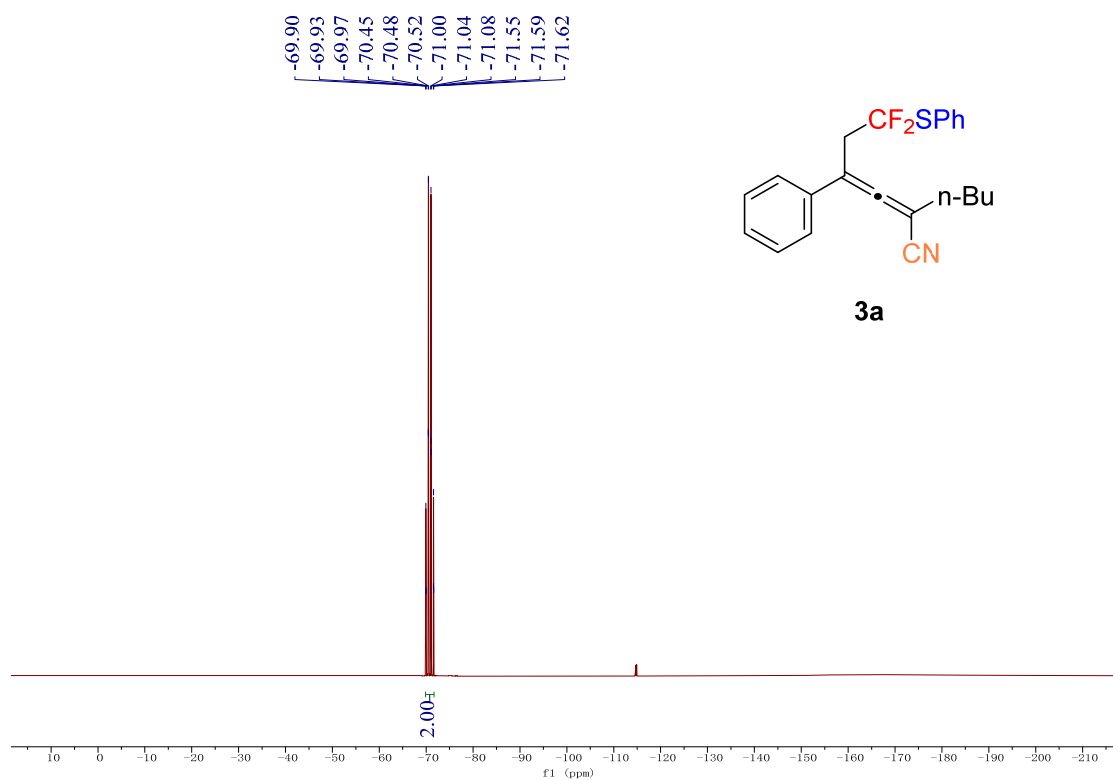

$^1\text{H NMR}$  (400 MHz,  $\text{CDCl}_3$ )

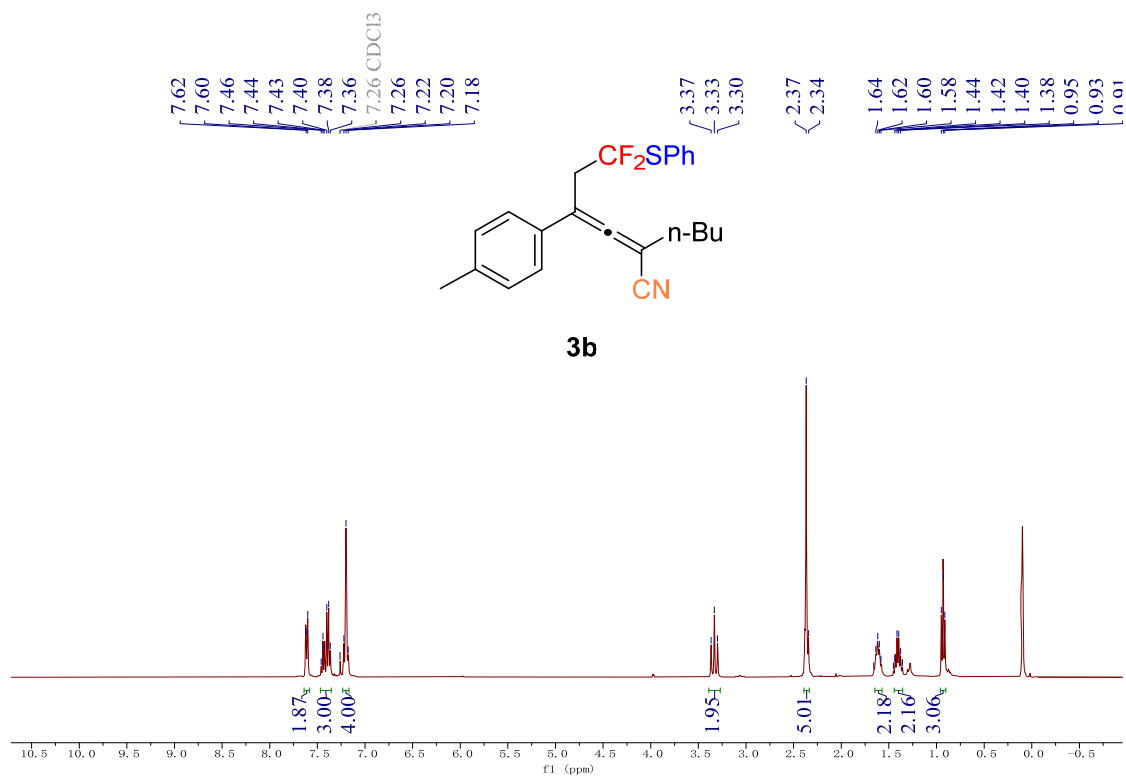



**<sup>13</sup>C NMR (101 MHz, CDCl<sub>3</sub>)**

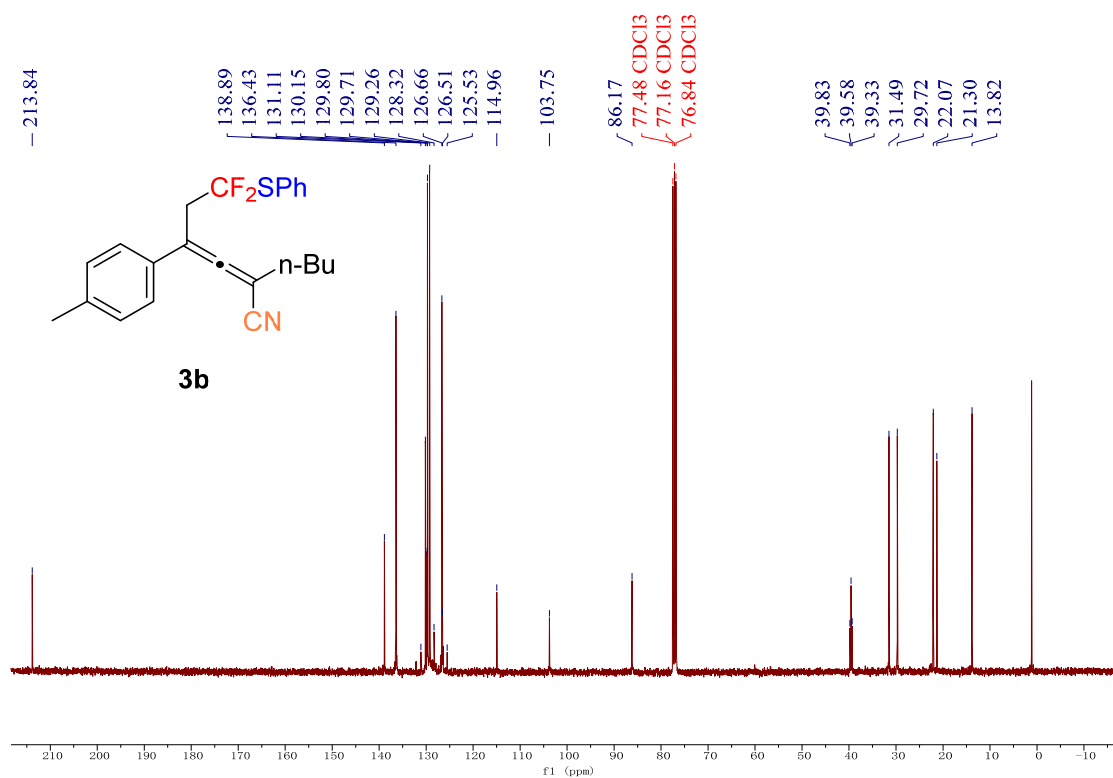

**<sup>19</sup>F NMR (376 MHz, CDCl<sub>3</sub>)**

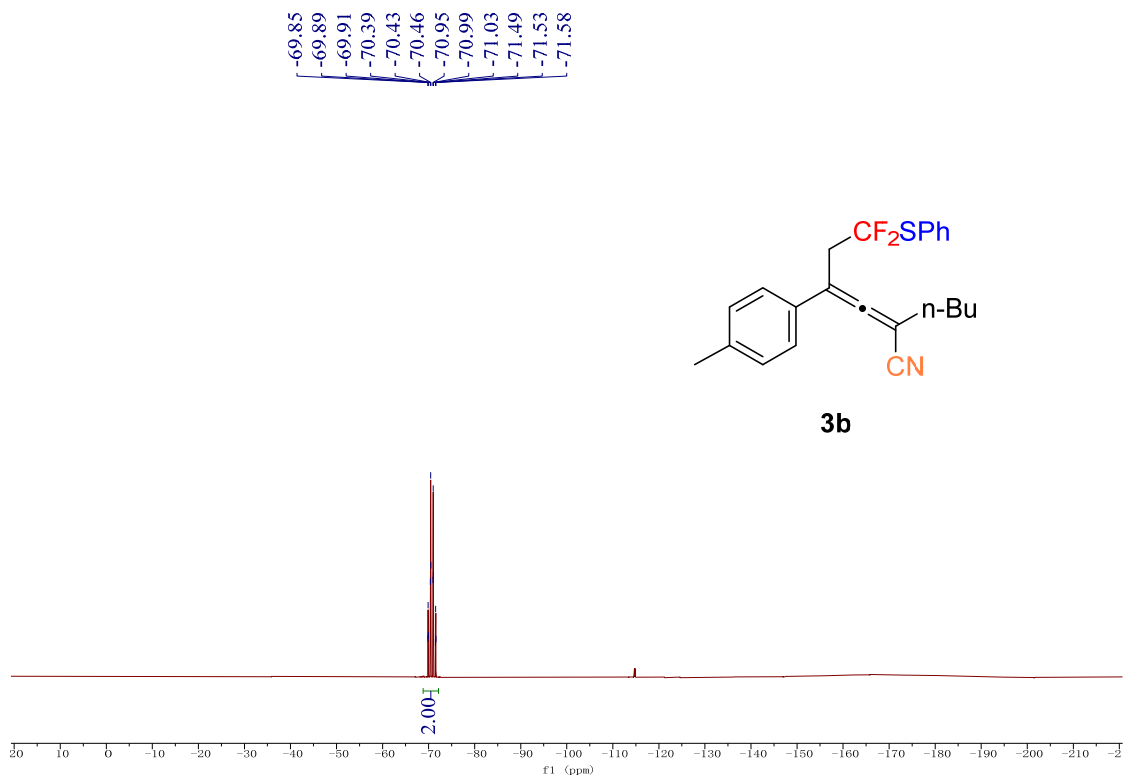

$^1\text{H}$  NMR (400 MHz,  $\text{CDCl}_3$ )

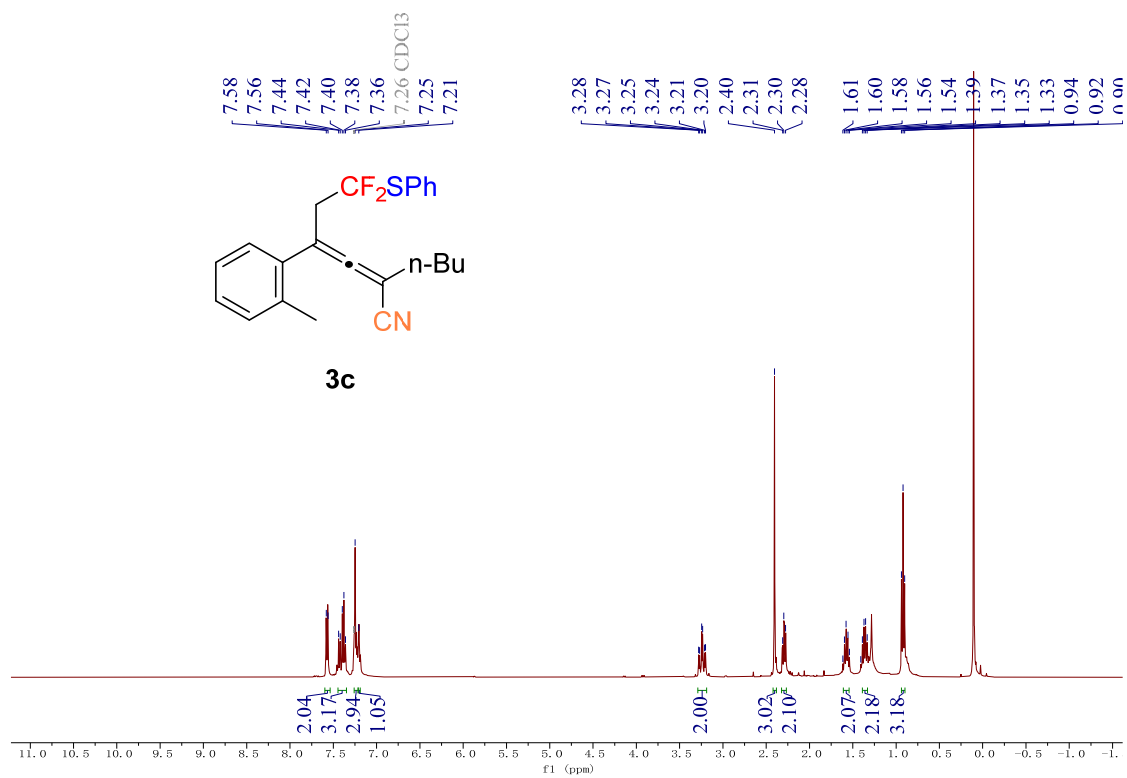

$^{13}\text{C}$  NMR (101 MHz,  $\text{CDCl}_3$ )

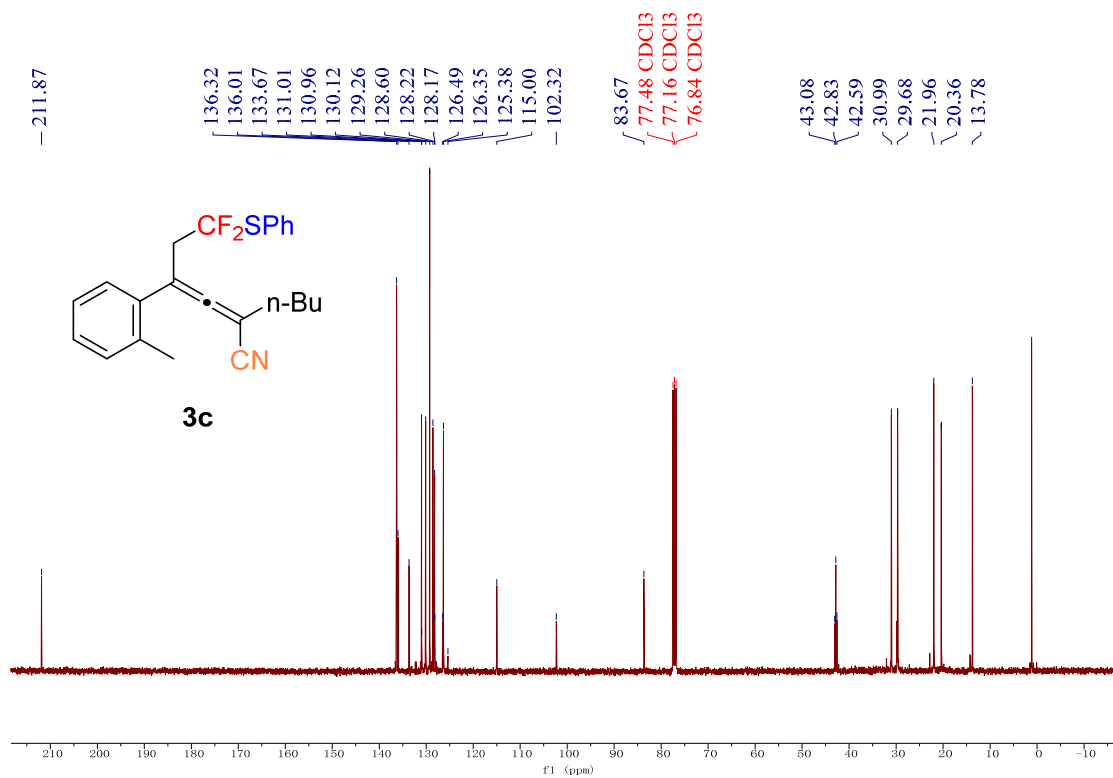

$^{19}\text{F}$  NMR (376 MHz,  $\text{CDCl}_3$ )

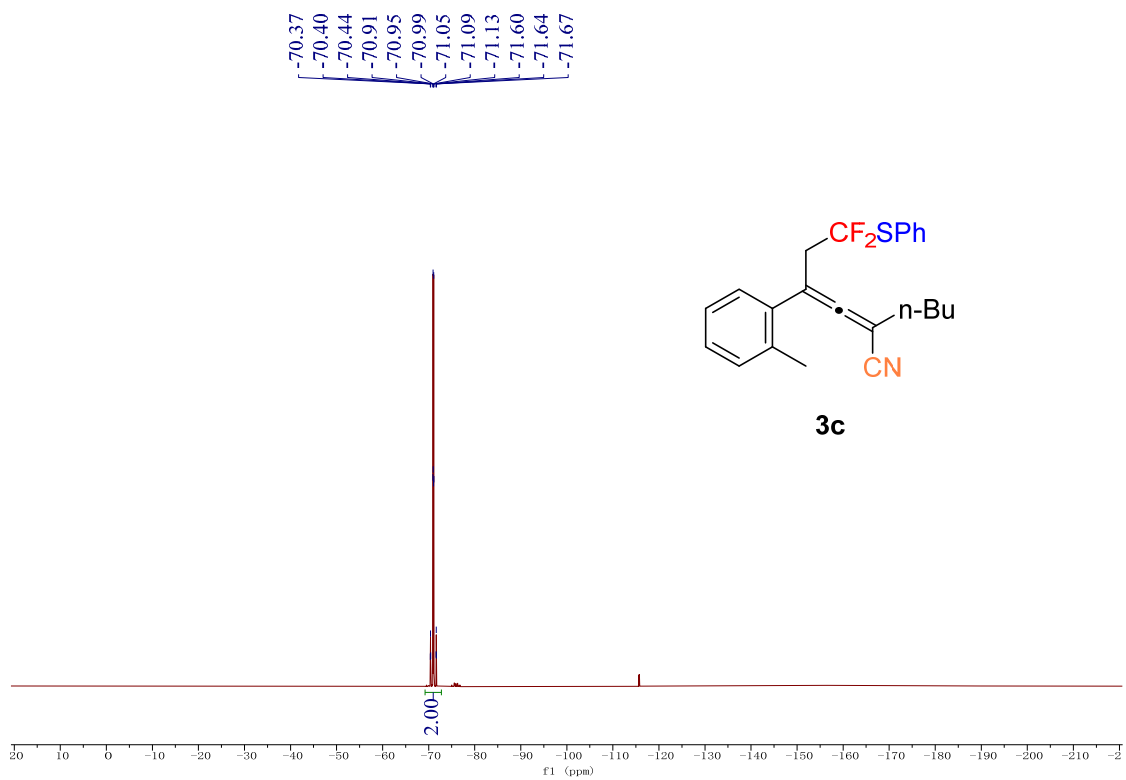

<sup>1</sup>H NMR (400 MHz, CDCl<sub>3</sub>)

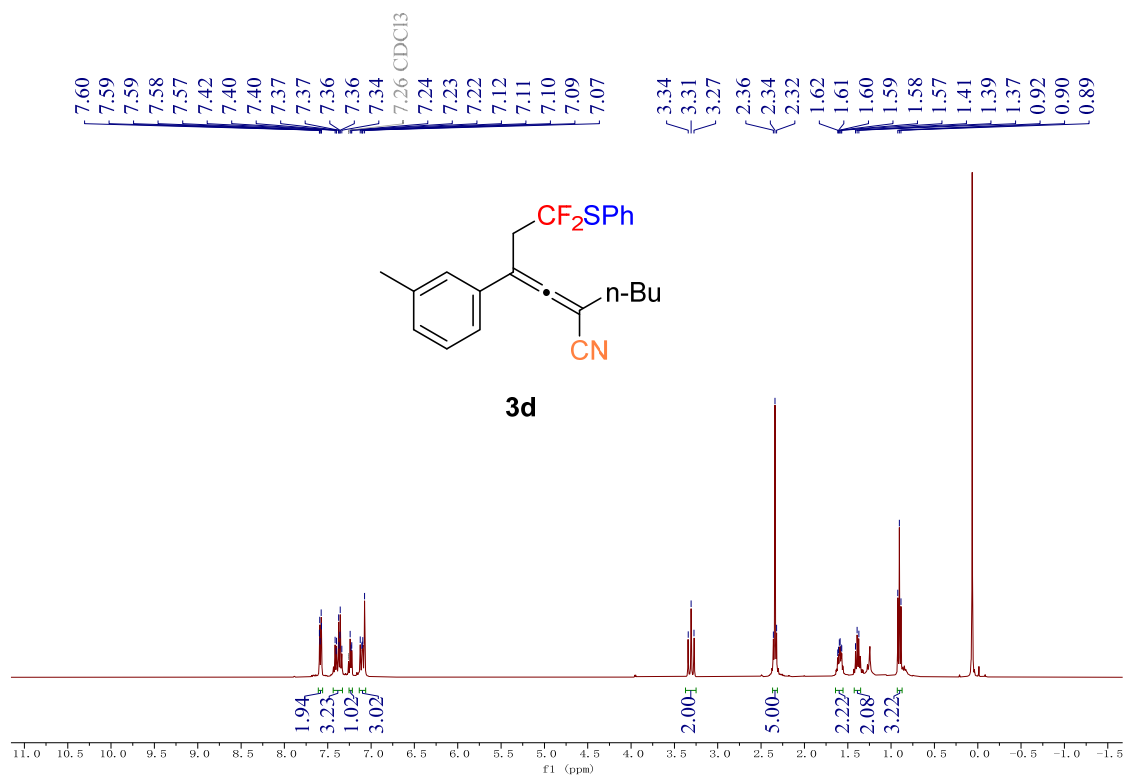

<sup>13</sup>C NMR (101 MHz, CDCl<sub>3</sub>)

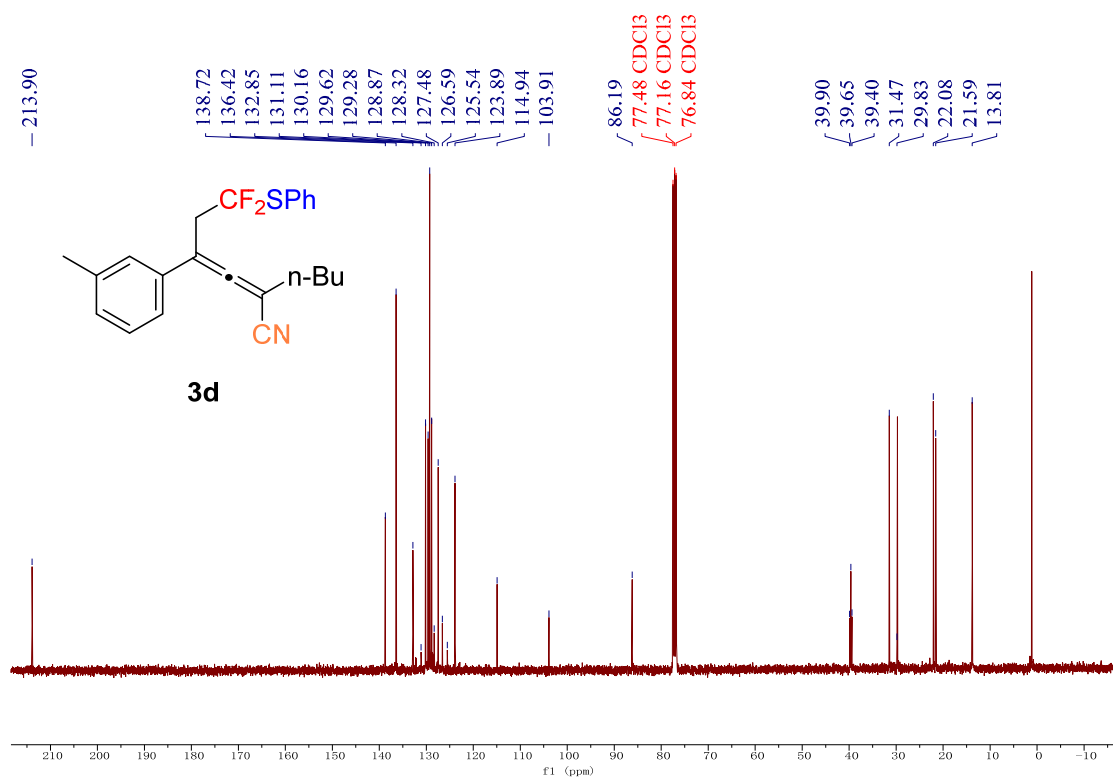

<sup>19</sup>F NMR (376 MHz, CDCl<sub>3</sub>)

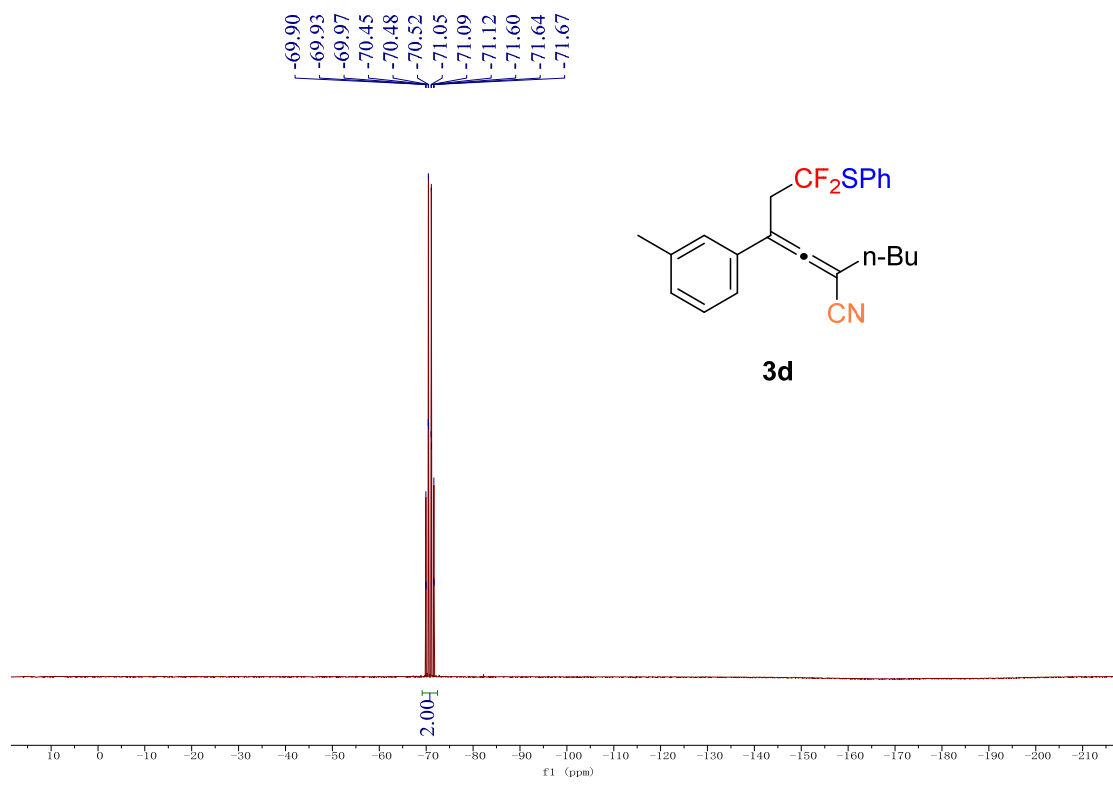



**<sup>1</sup>H NMR (400 MHz, CDCl<sub>3</sub>)**

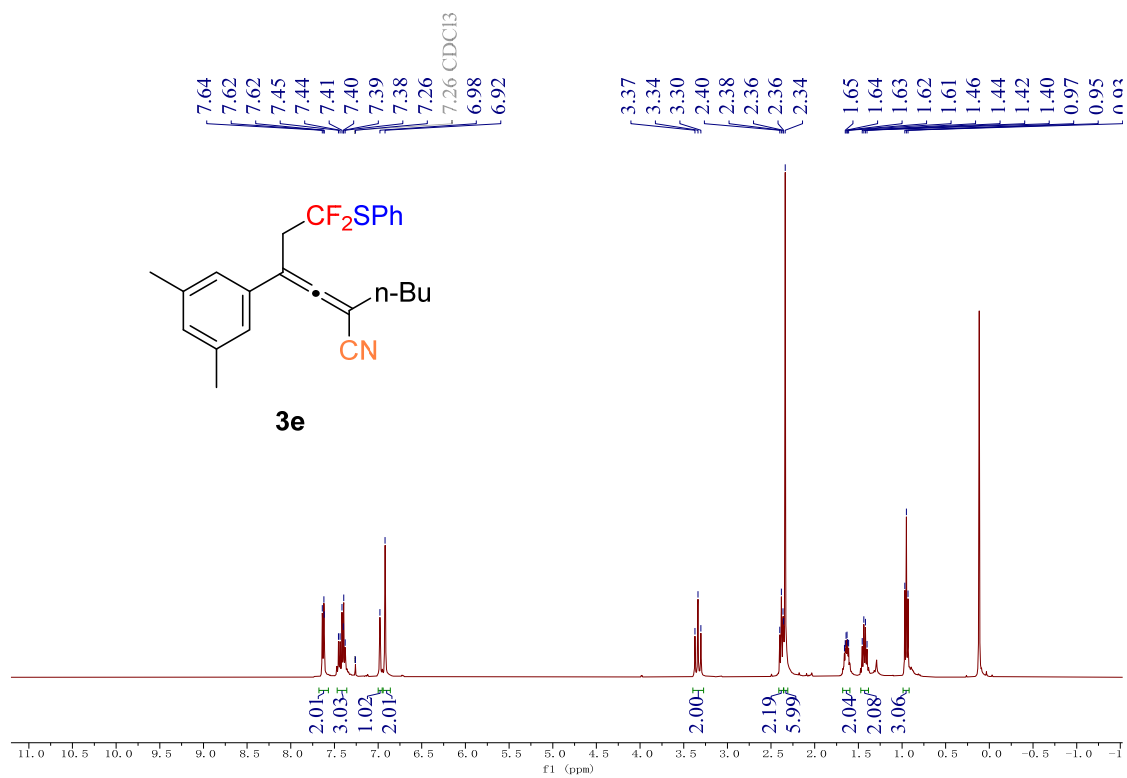

**<sup>13</sup>C NMR (101 MHz, CDCl<sub>3</sub>)**

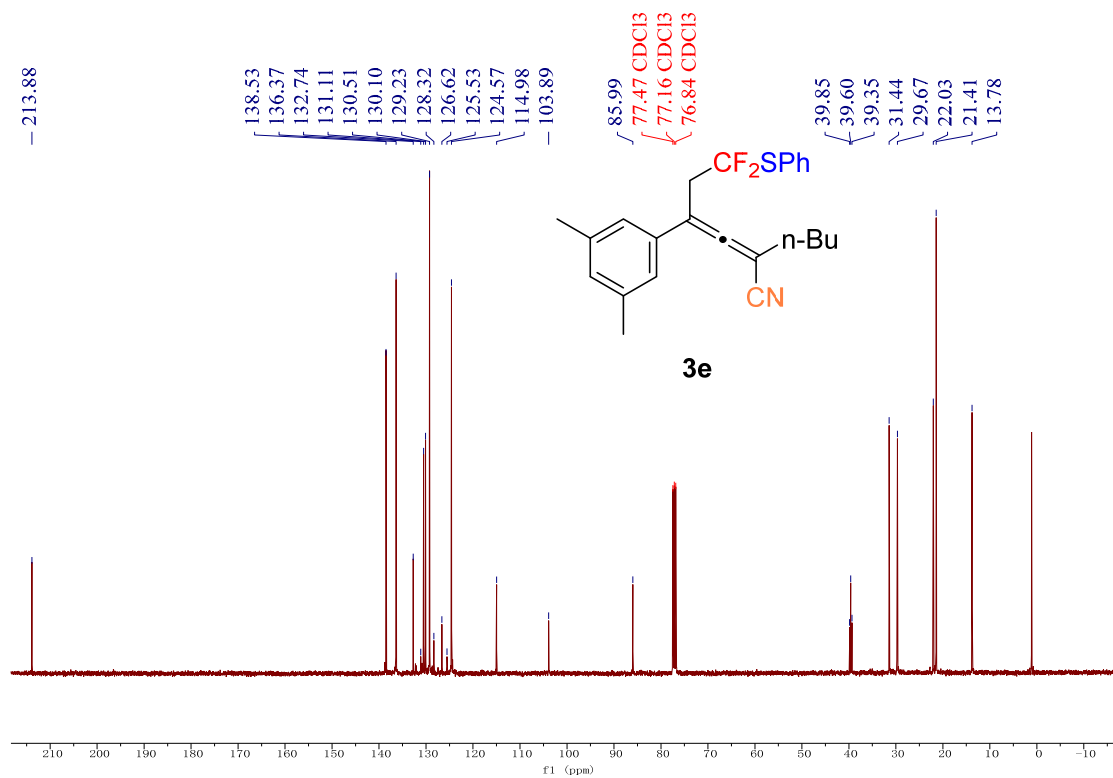

<sup>19</sup>F NMR (376 MHz, CDCl<sub>3</sub>)

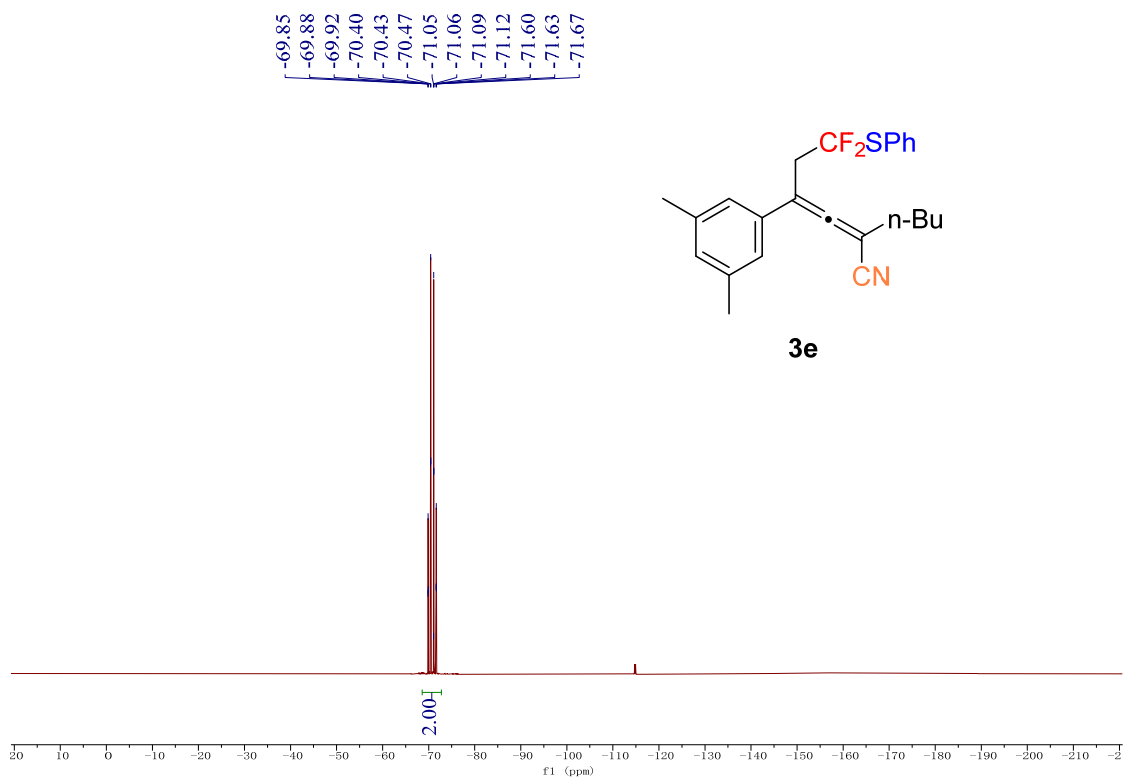

$^1\text{H NMR}$  (400 MHz,  $\text{CDCl}_3$ )

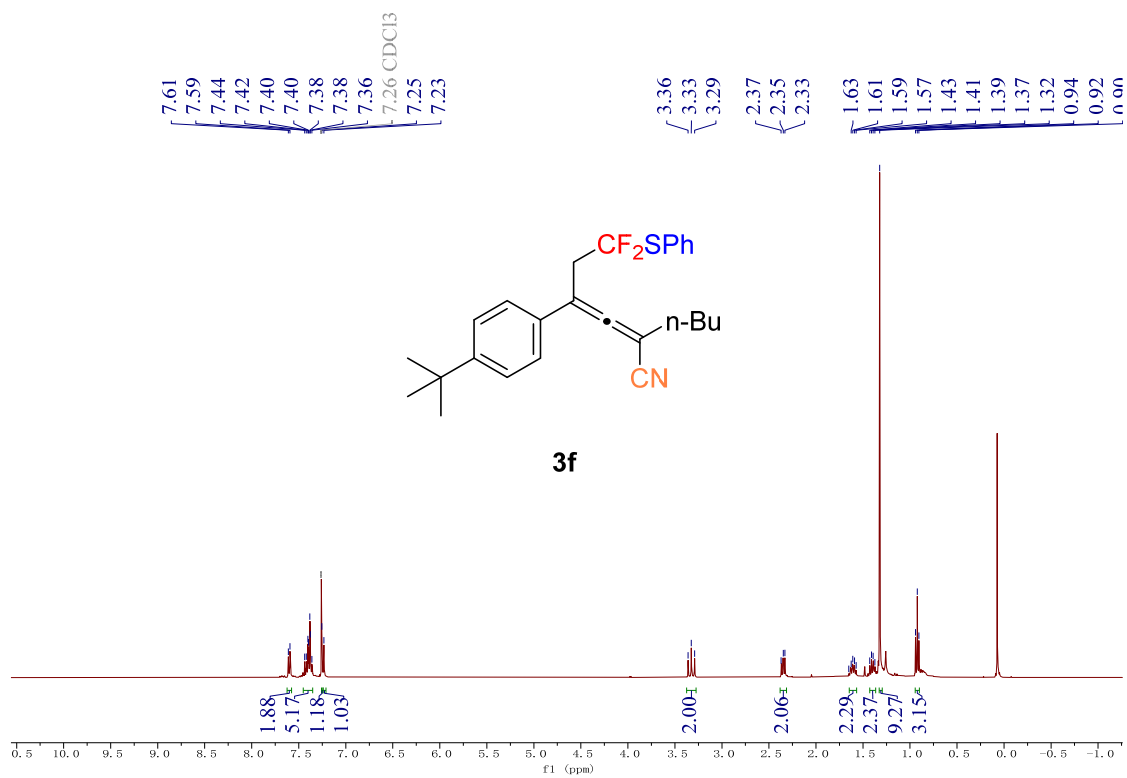

**$^{13}\text{C}$  NMR (101 MHz,  $\text{CDCl}_3$ )**

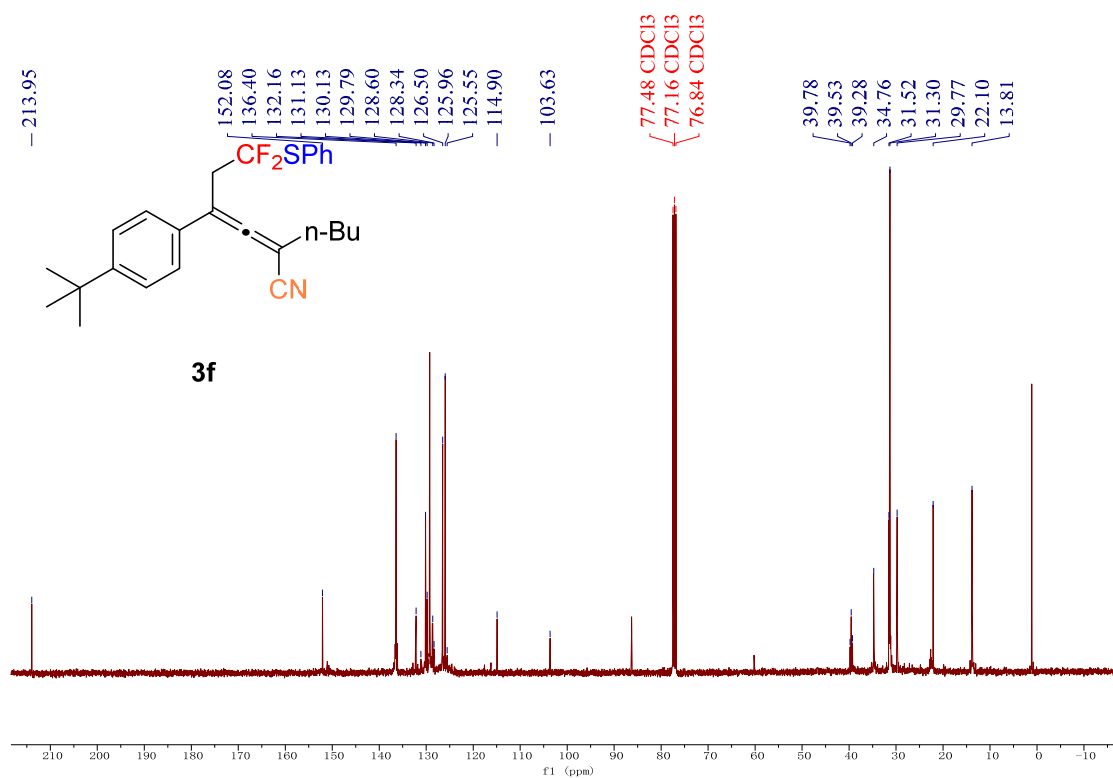

**$^{19}\text{F}$  NMR (376 MHz,  $\text{CDCl}_3$ )**

-69.92  
-69.95  
-69.99  
-70.46  
-70.50  
-70.53  
-71.00  
-71.04  
-71.08  
-71.55  
-71.59  
-71.62

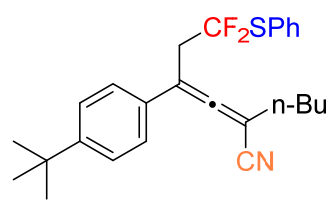

**3f**

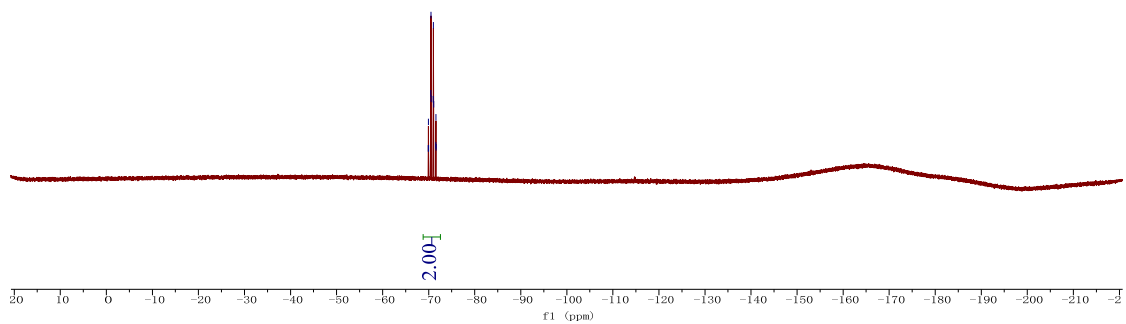

**<sup>1</sup>H NMR (400 MHz, CDCl<sub>3</sub>)**

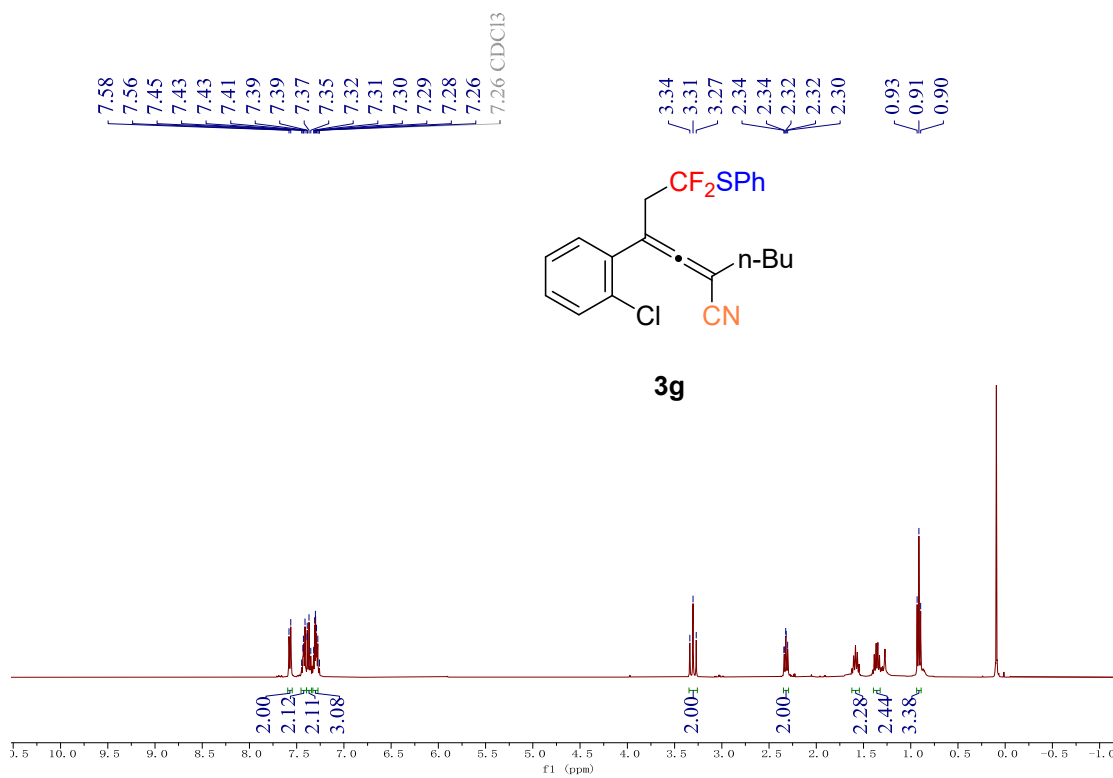

**<sup>13</sup>C NMR (101 MHz, CDCl<sub>3</sub>)**

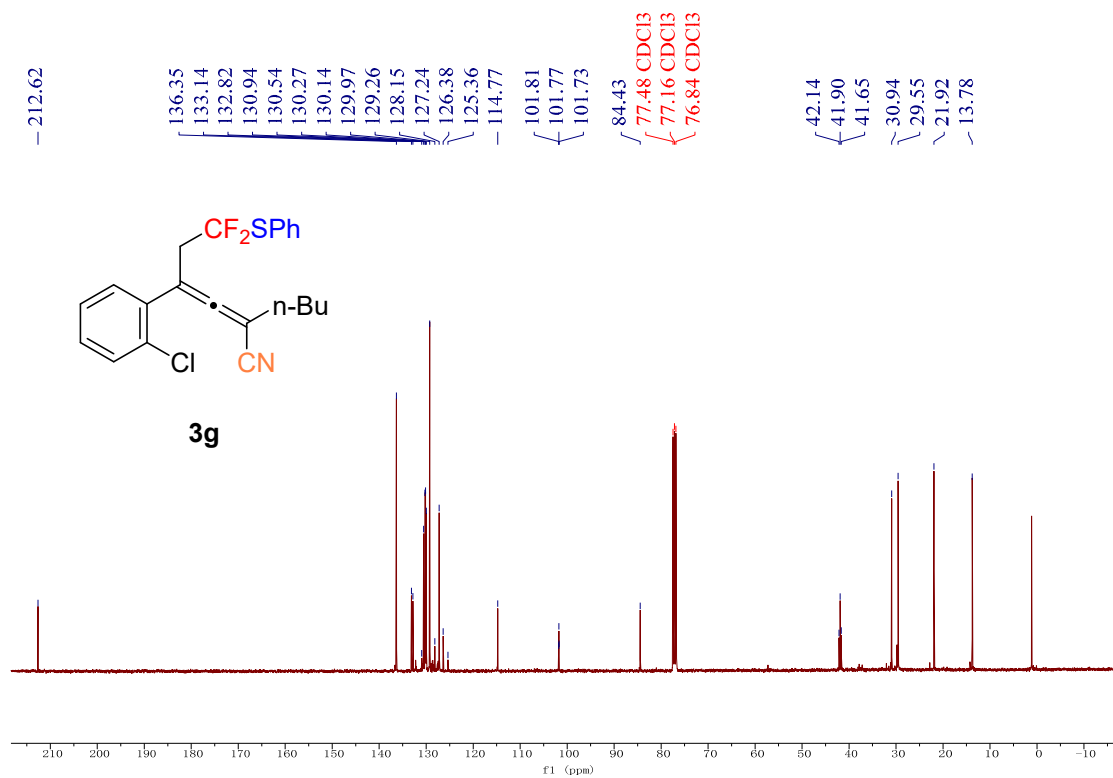



**$^{19}\text{F}$  NMR (376 MHz,  $\text{CDCl}_3$ )**

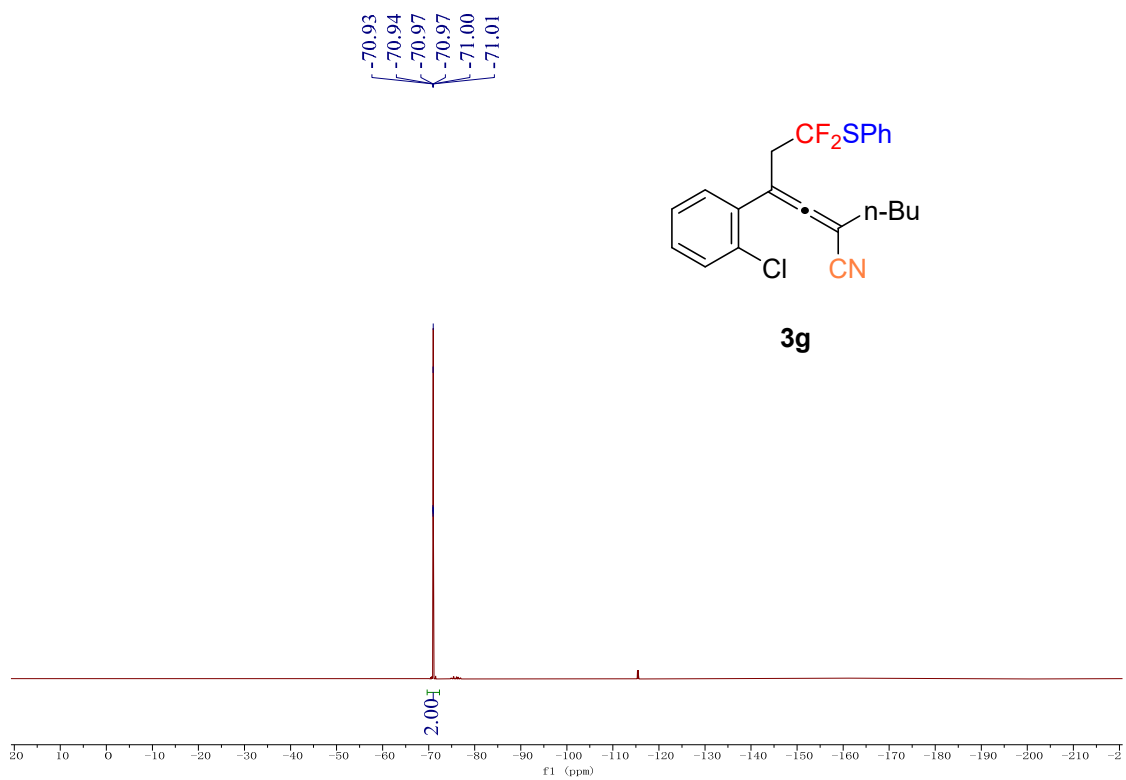

**$^1\text{H}$  NMR (400 MHz,  $\text{CDCl}_3$ )**

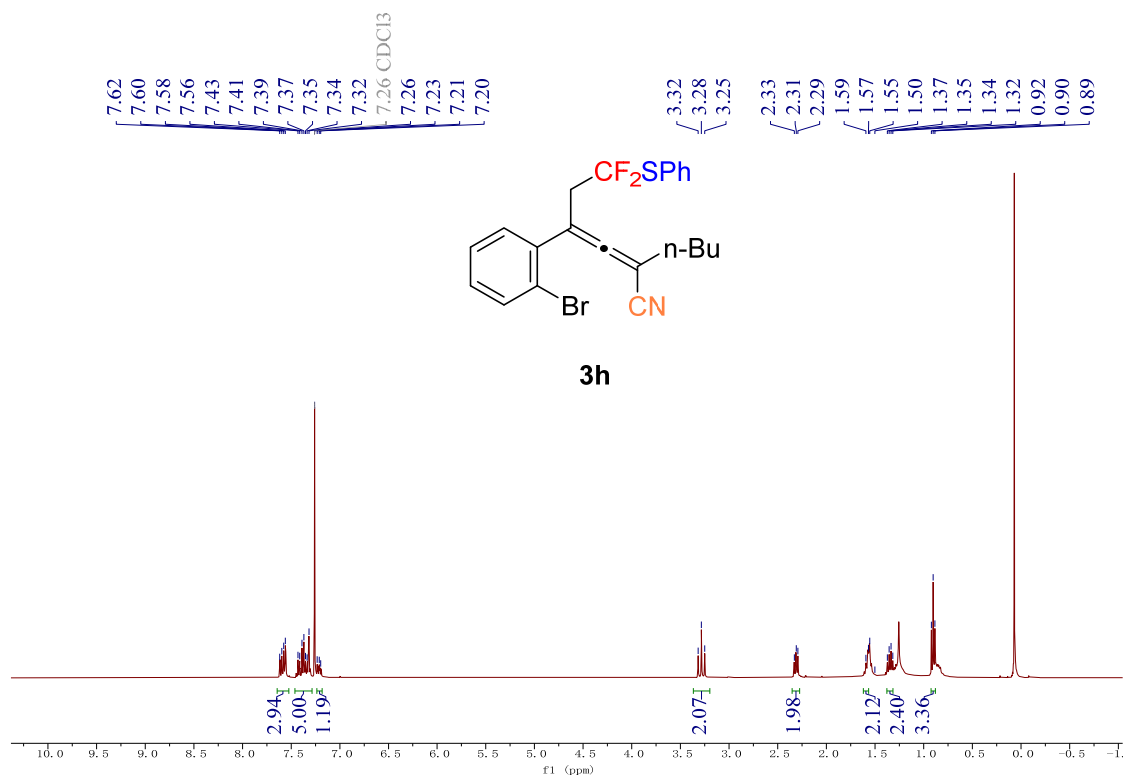

**<sup>13</sup>C NMR (101 MHz, CDCl<sub>3</sub>)**

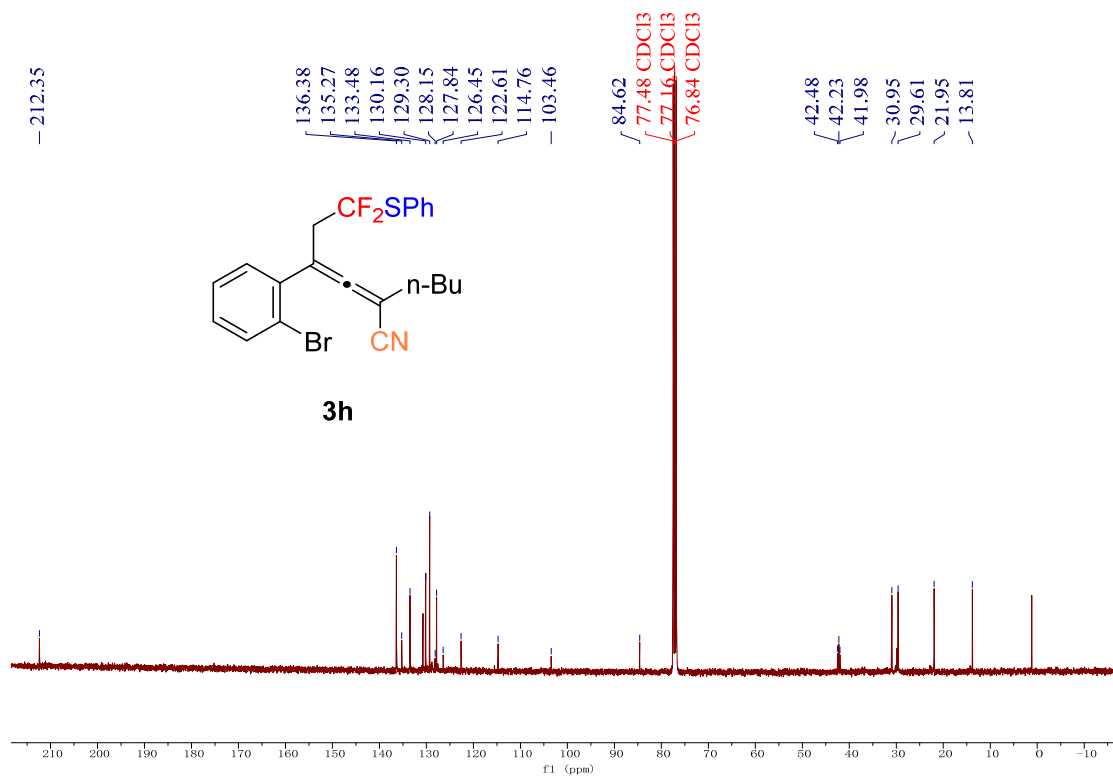

**<sup>19</sup>F NMR (376 MHz, CDCl<sub>3</sub>)**

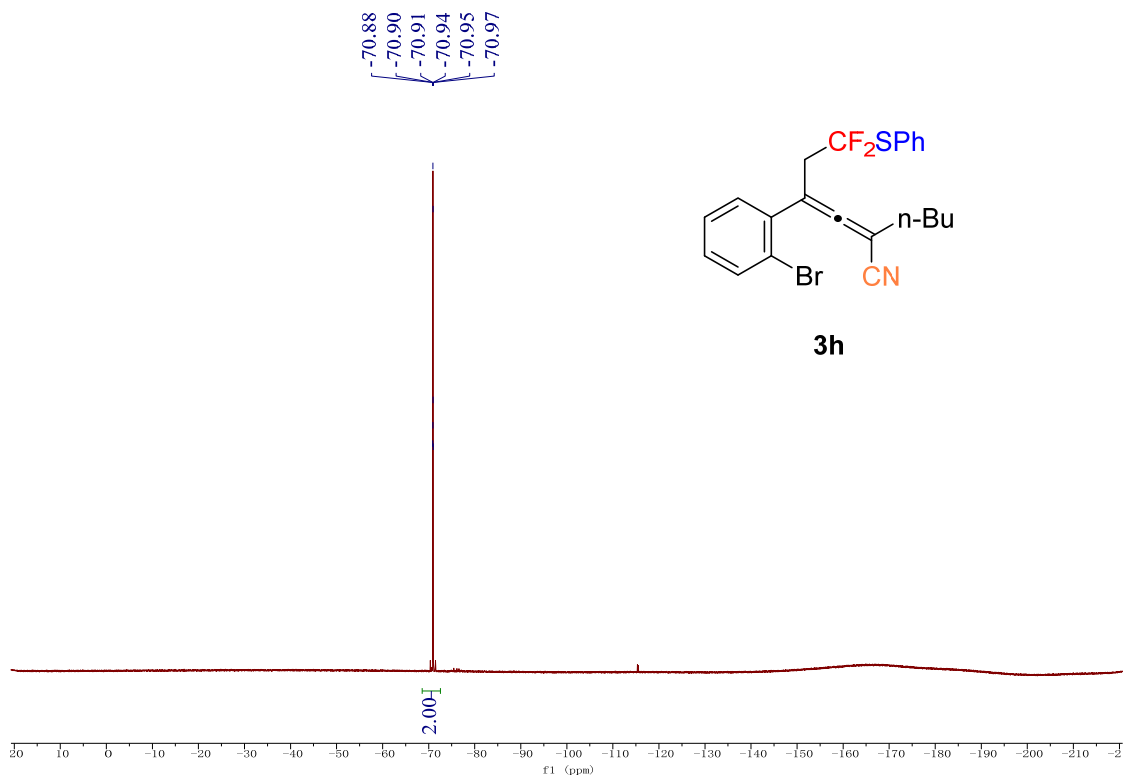

<sup>1</sup>H NMR (400 MHz, CDCl<sub>3</sub>)

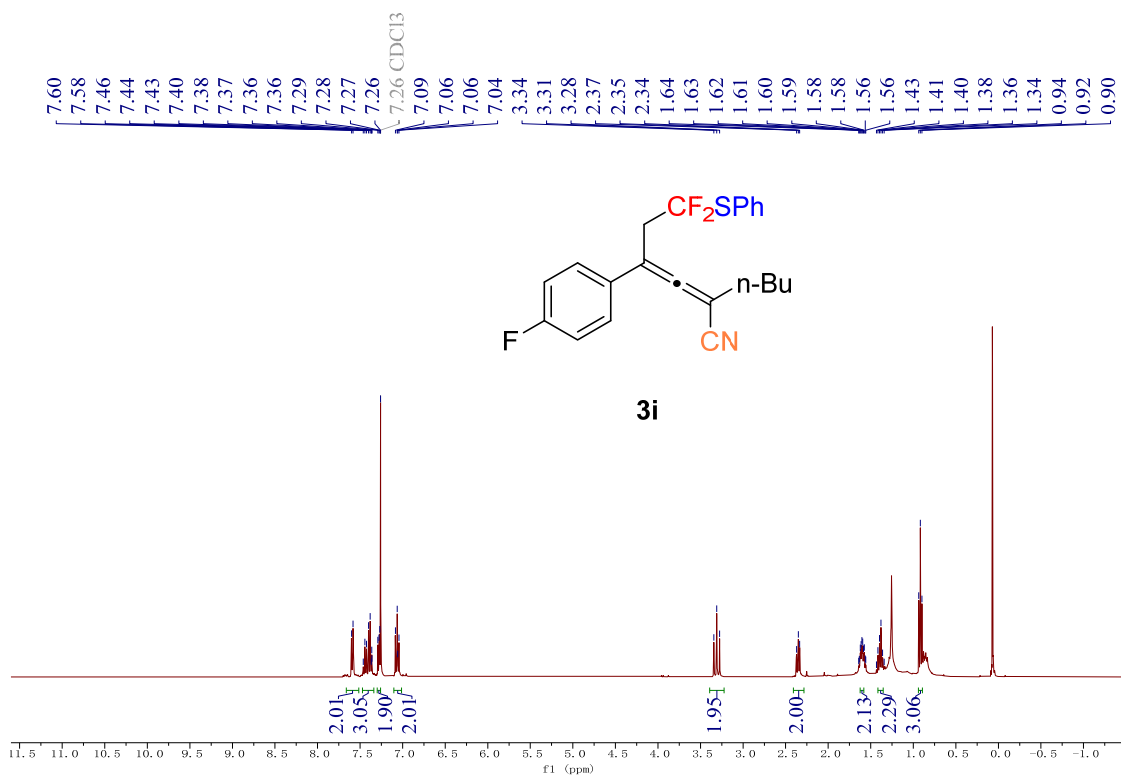

<sup>13</sup>C NMR (101 MHz, CDCl<sub>3</sub>)

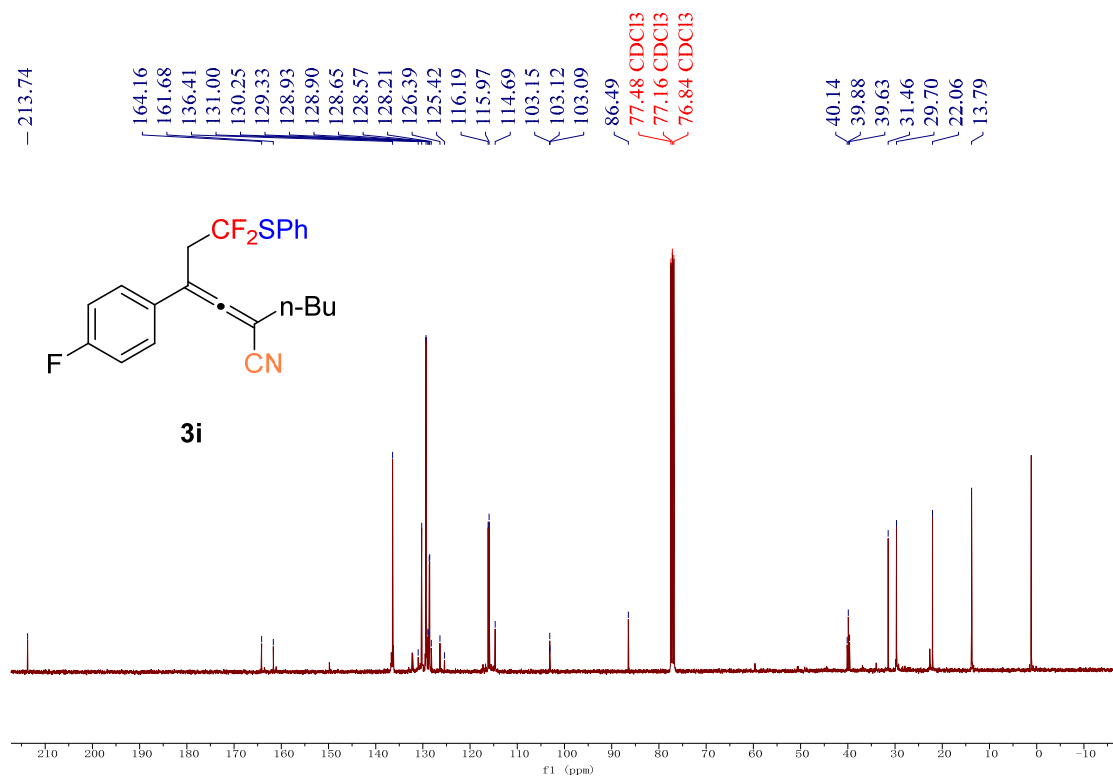

**<sup>19</sup>F NMR (376 MHz, CDCl<sub>3</sub>)**

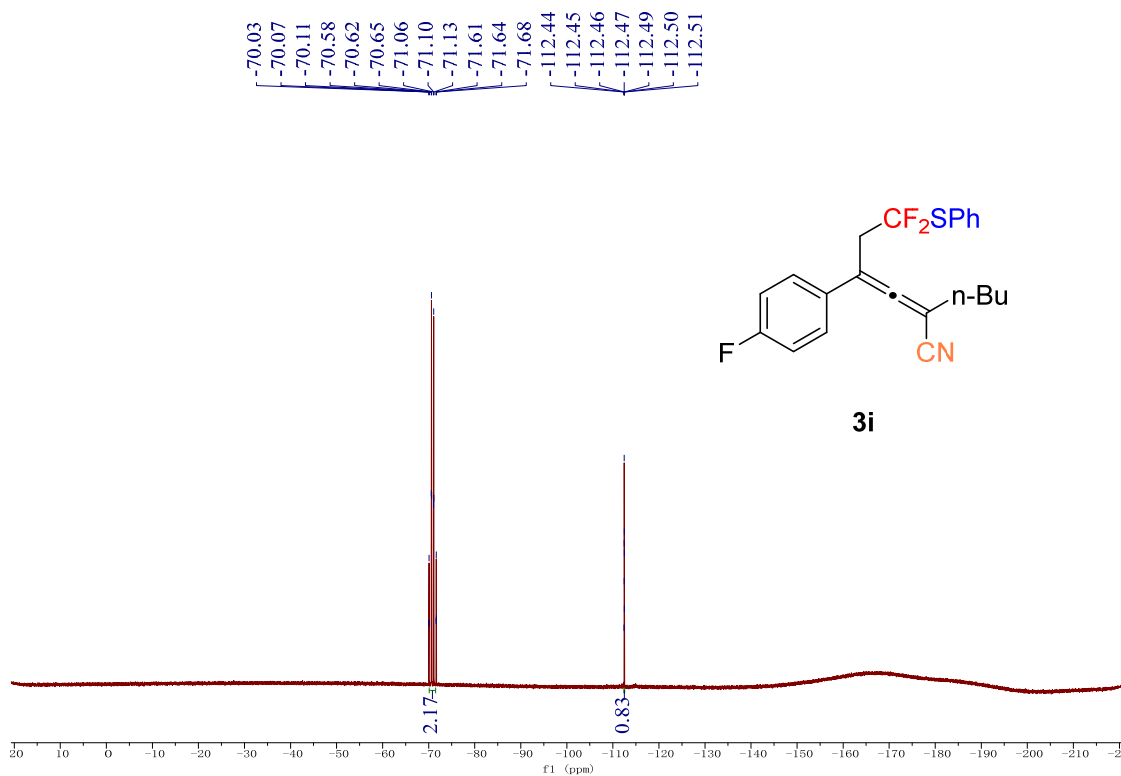

**<sup>1</sup>H NMR (400 MHz, CDCl<sub>3</sub>)**

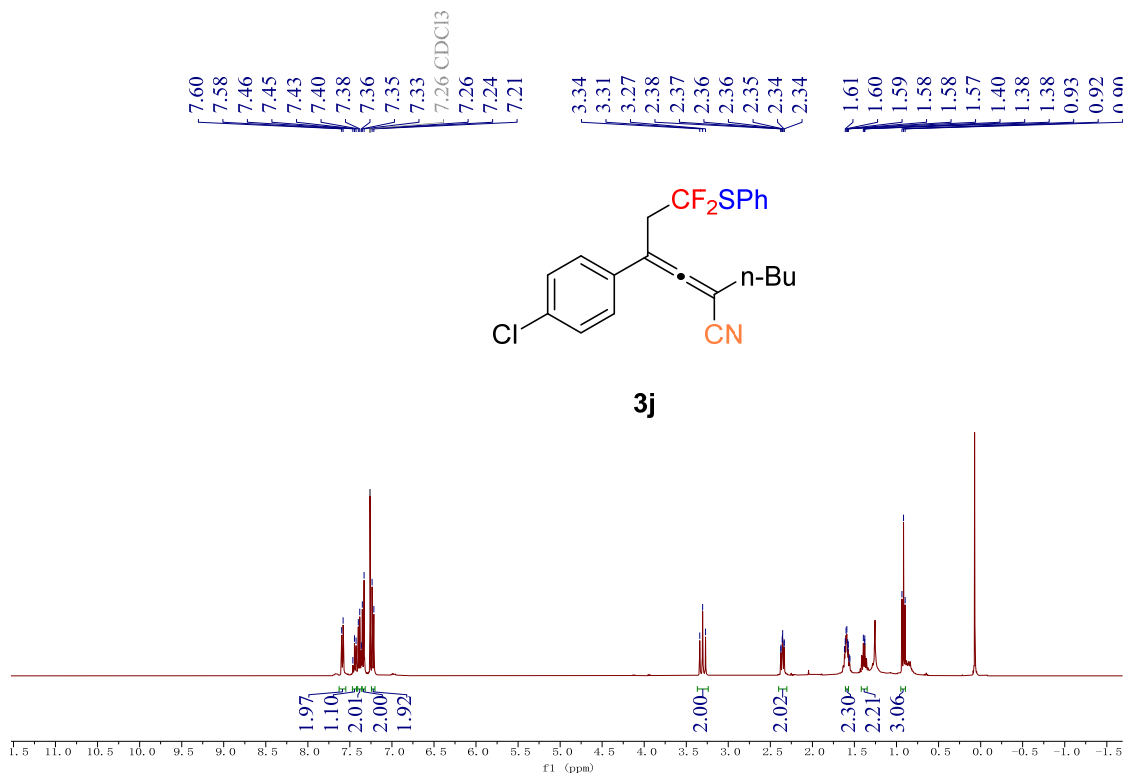



**<sup>13</sup>C NMR (101 MHz, CDCl<sub>3</sub>)**

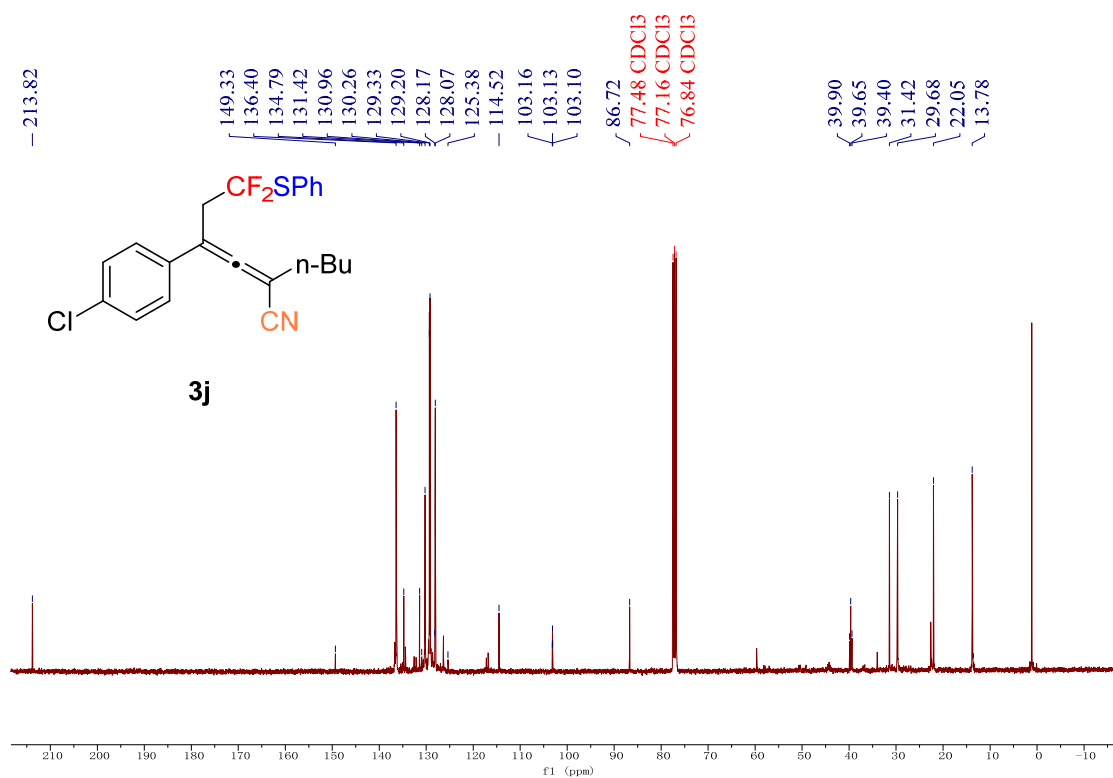

**<sup>19</sup>F NMR (376 MHz, CDCl<sub>3</sub>)**

-70.07  
-70.11  
-70.15  
-70.62  
-70.66  
-70.69  
-71.10  
-71.14  
-71.18  
-71.65  
-71.69  
-71.73

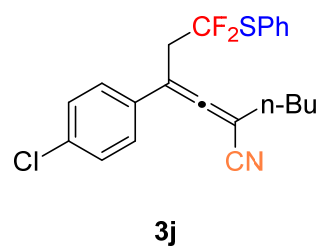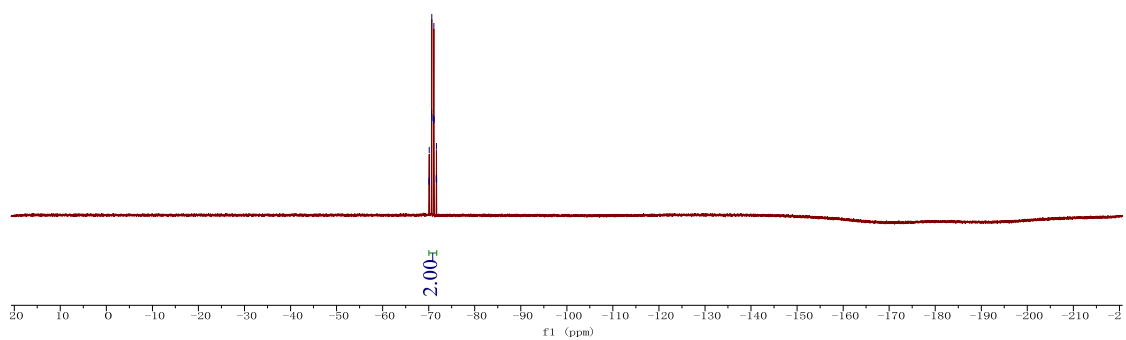

<sup>1</sup>H NMR (400 MHz, CDCl<sub>3</sub>)

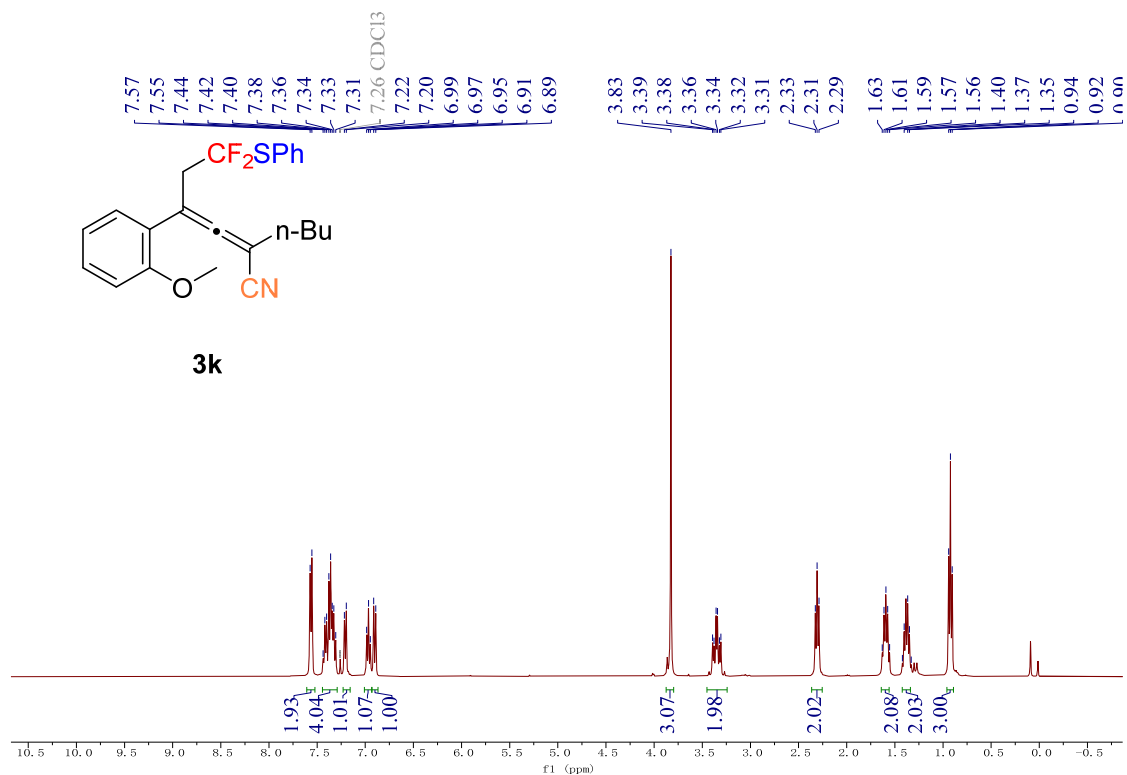

<sup>13</sup>C NMR (101 MHz, CDCl<sub>3</sub>)

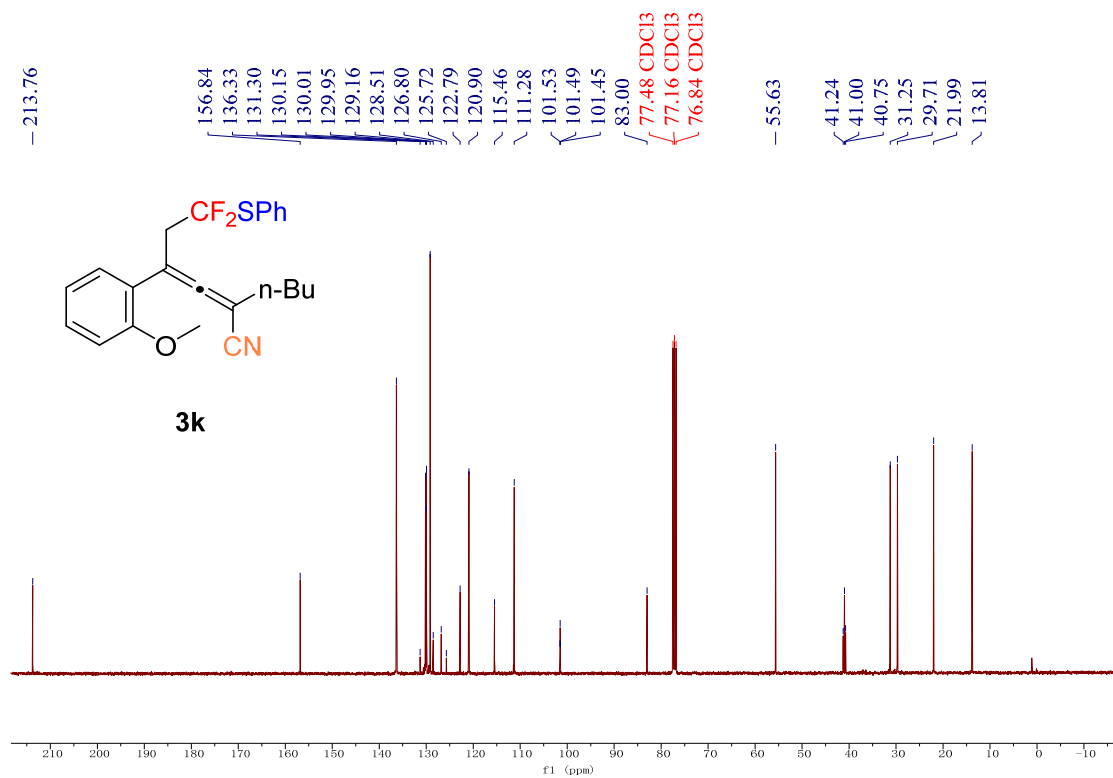

**<sup>19</sup>F NMR (376 MHz, CDCl<sub>3</sub>)**

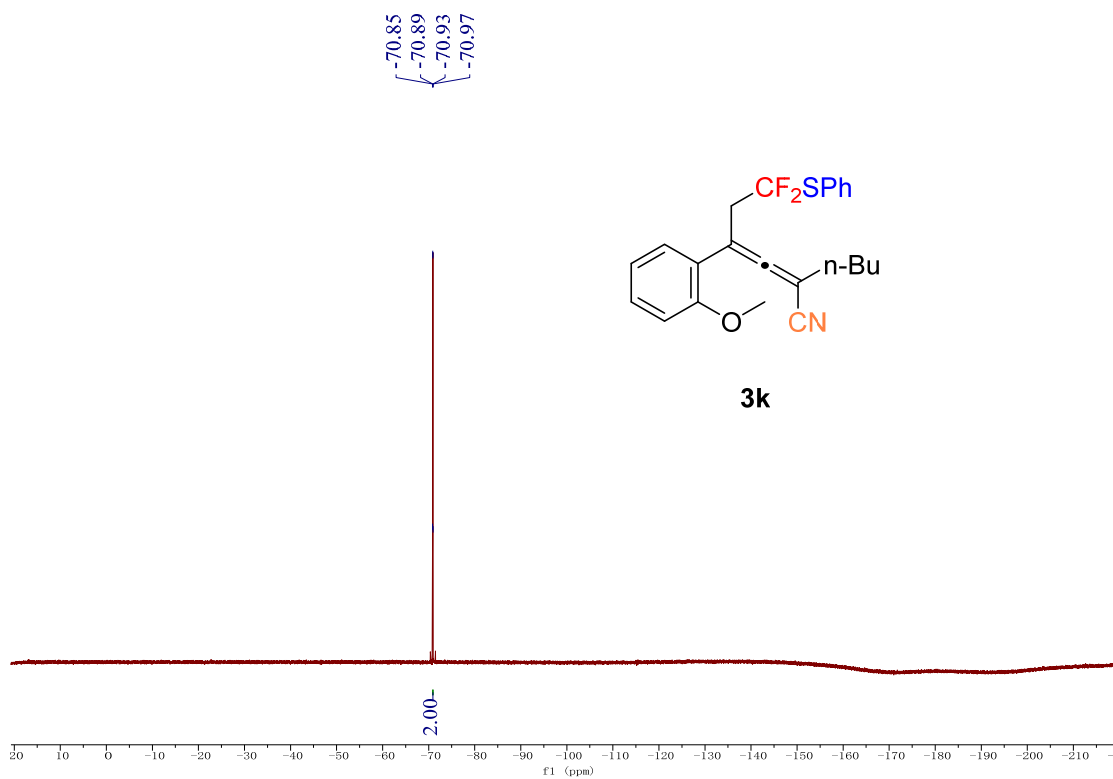

$^1\text{H NMR}$  (400 MHz,  $\text{CDCl}_3$ )

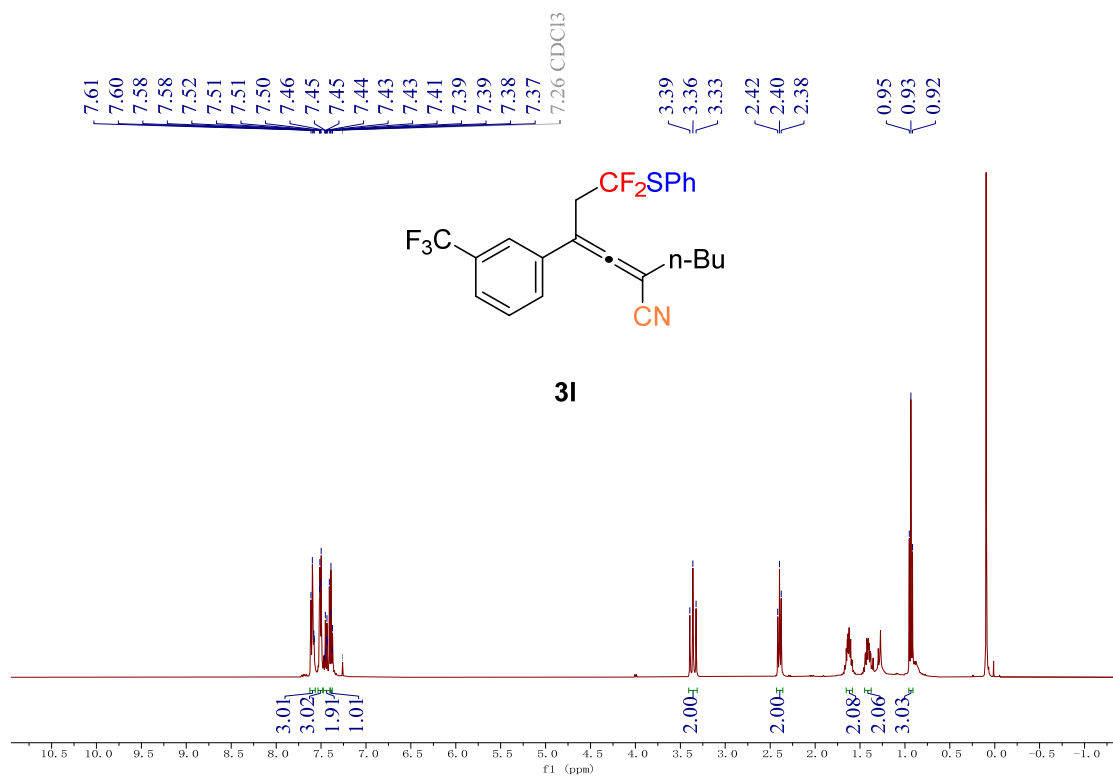

**<sup>13</sup>C NMR (101 MHz, CDCl<sub>3</sub>)**

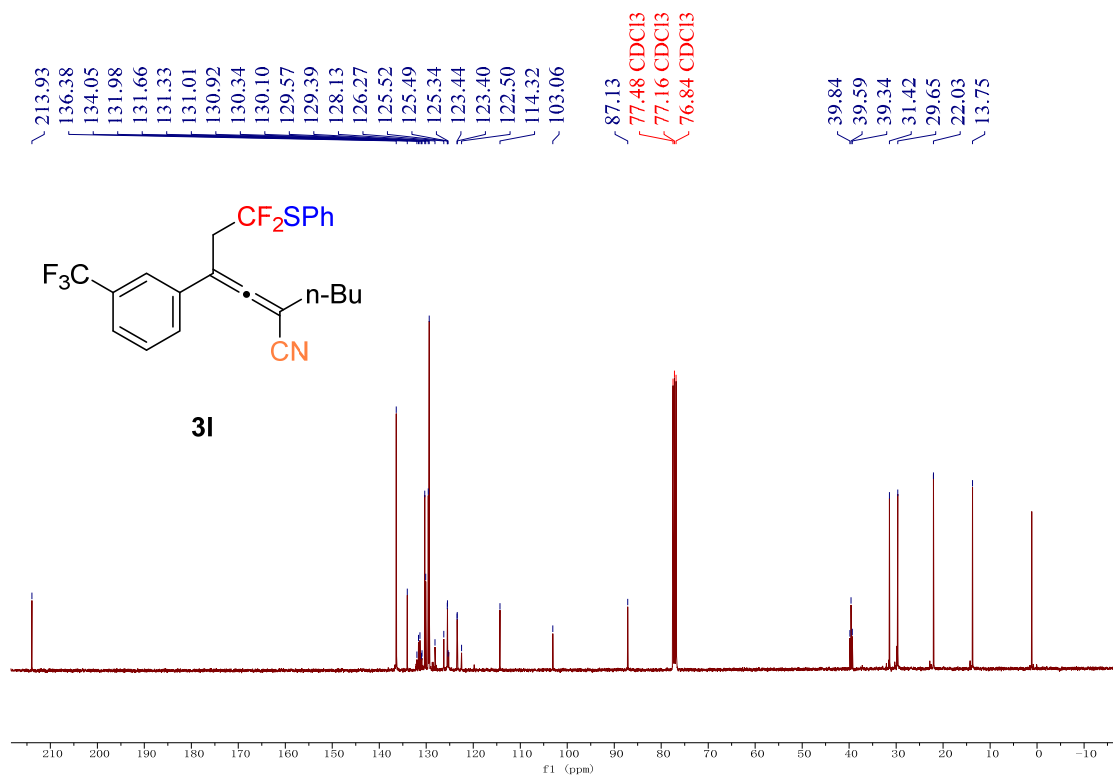

**<sup>19</sup>F NMR (376 MHz, CDCl<sub>3</sub>)**

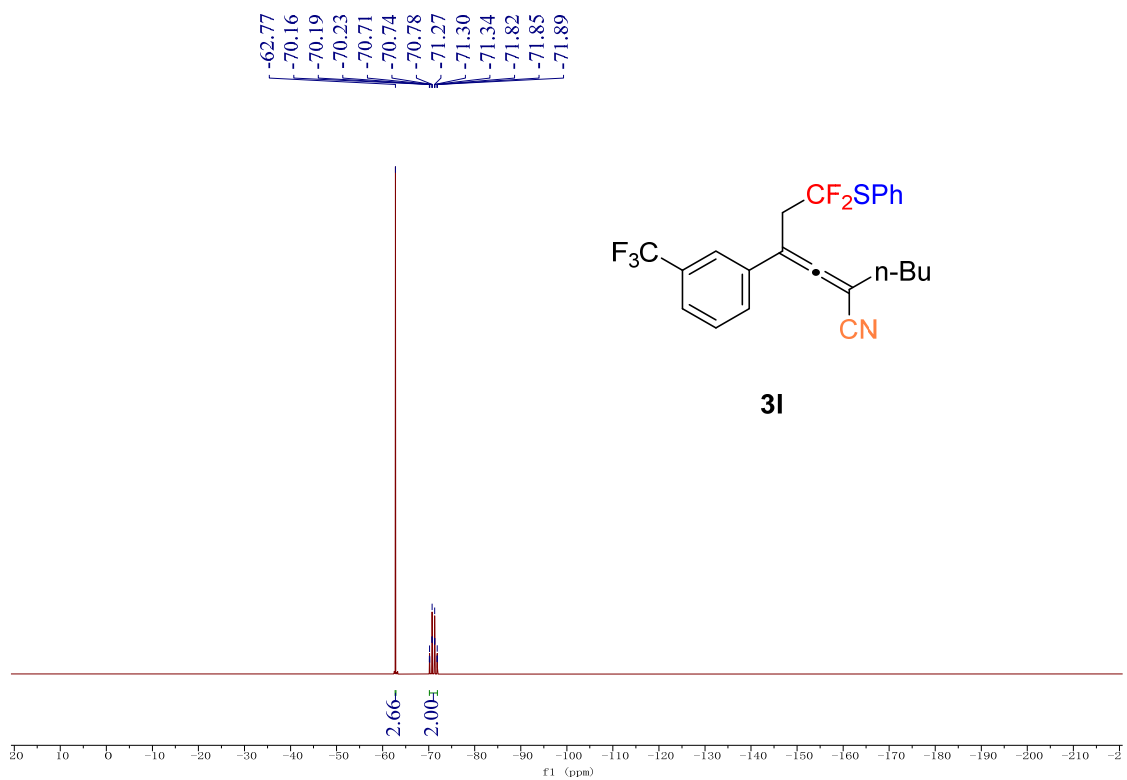

**<sup>1</sup>H NMR (400 MHz, CDCl<sub>3</sub>)**

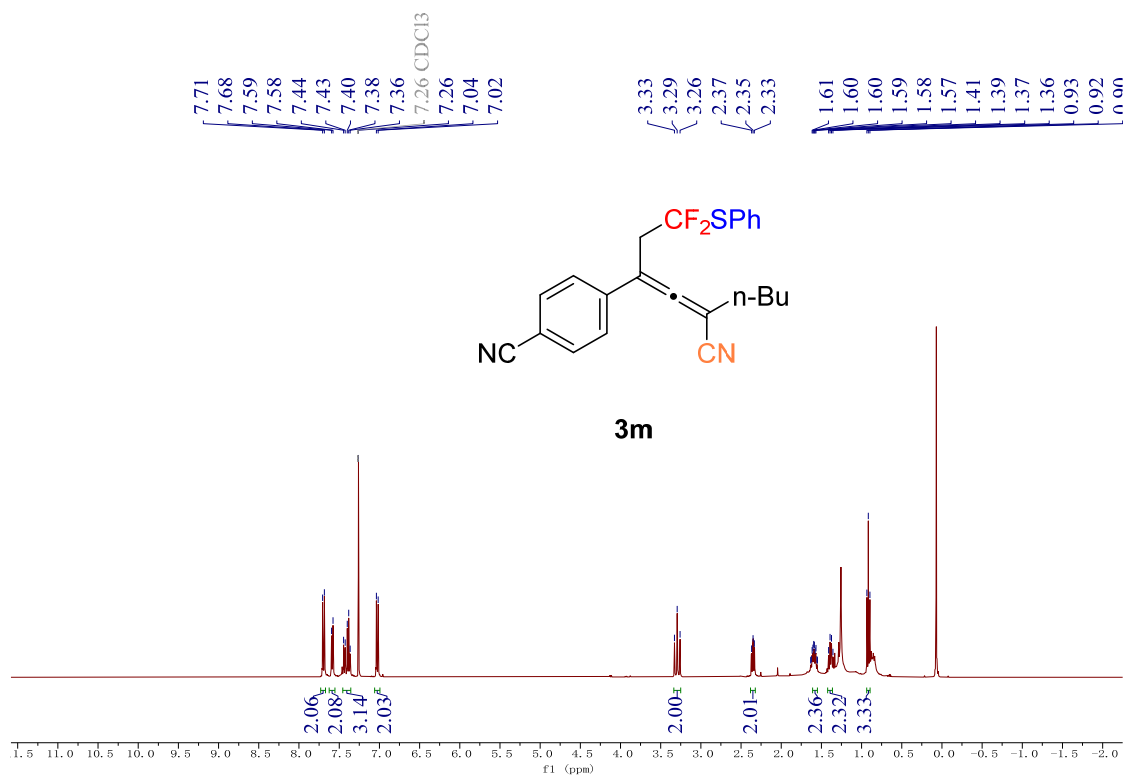

**<sup>13</sup>C NMR (101 MHz, CDCl<sub>3</sub>)**



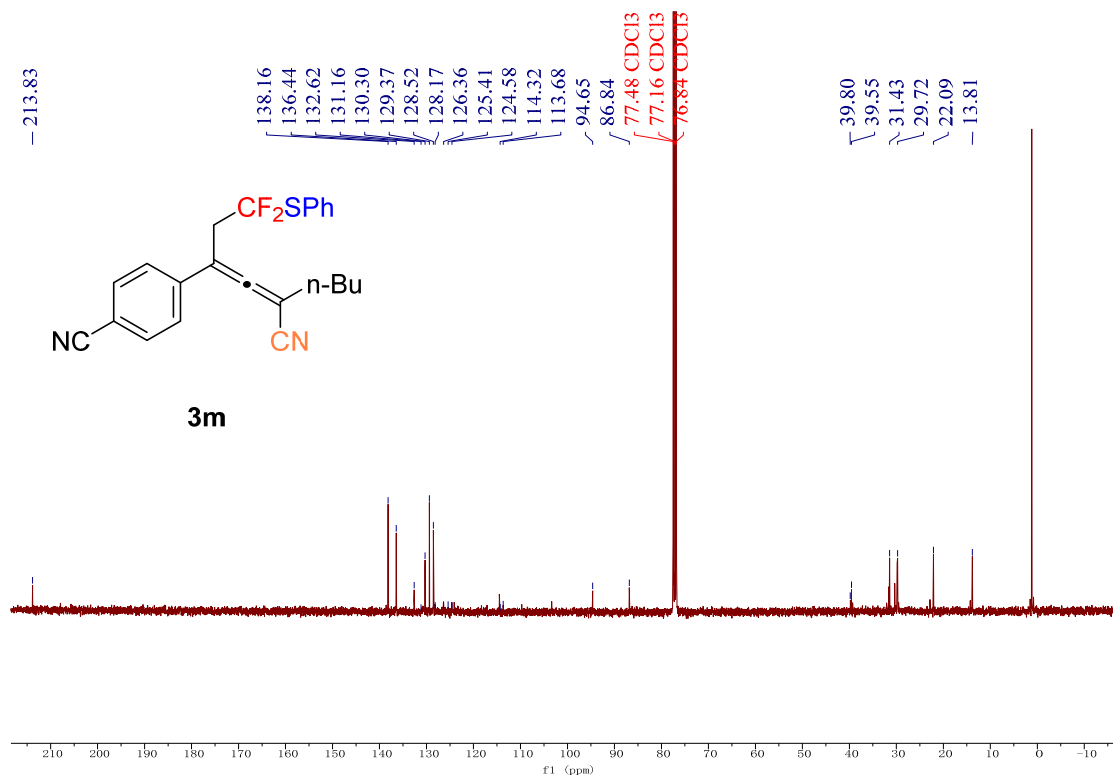

**<sup>19</sup>F NMR (376 MHz, CDCl<sub>3</sub>)**

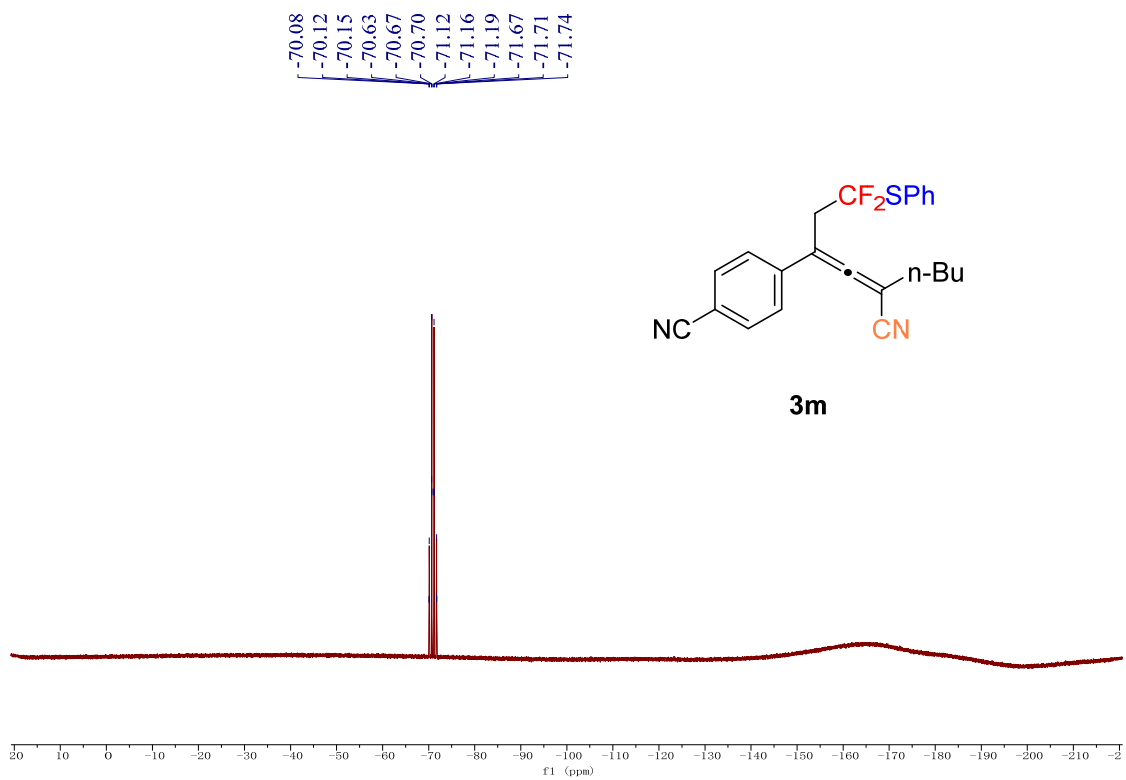

**<sup>1</sup>H NMR (400 MHz, CDCl<sub>3</sub>)**

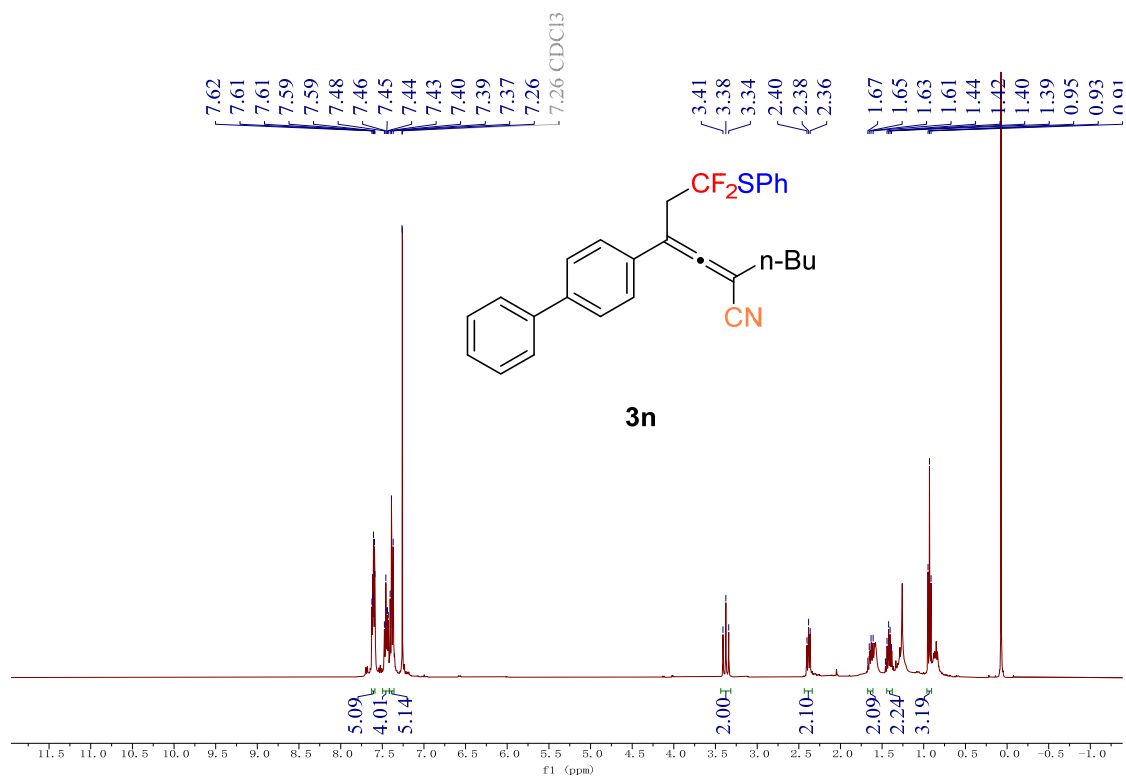

**$^{13}\text{C}$  NMR (101 MHz,  $\text{CDCl}_3$ )**

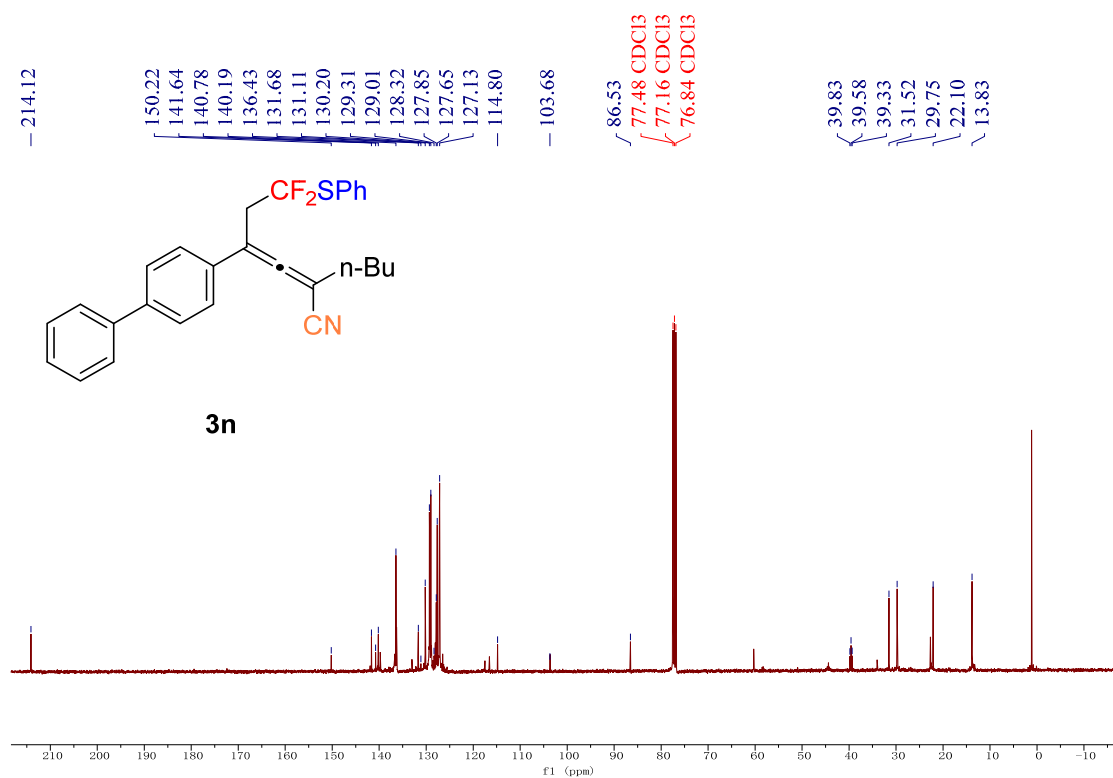

**$^{19}\text{F}$  NMR (376 MHz,  $\text{CDCl}_3$ )**

-69.92  
-69.95  
-69.99  
-70.46  
-70.50  
-70.53  
-71.00  
-71.04  
-71.08  
-71.55  
-71.59  
-71.62

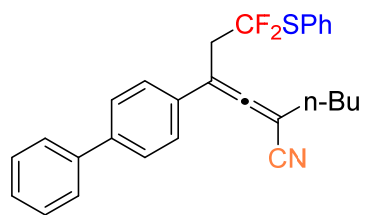

3n

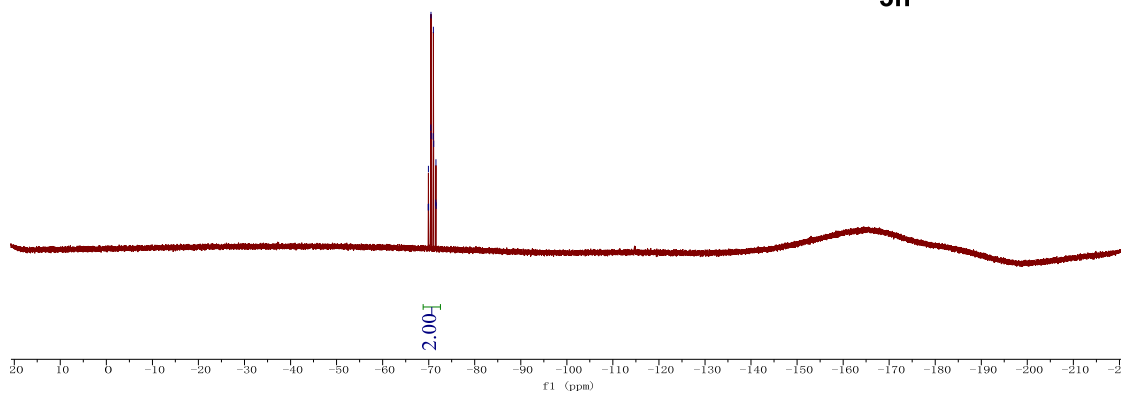

<sup>1</sup>H NMR (400 MHz, CDCl<sub>3</sub>)

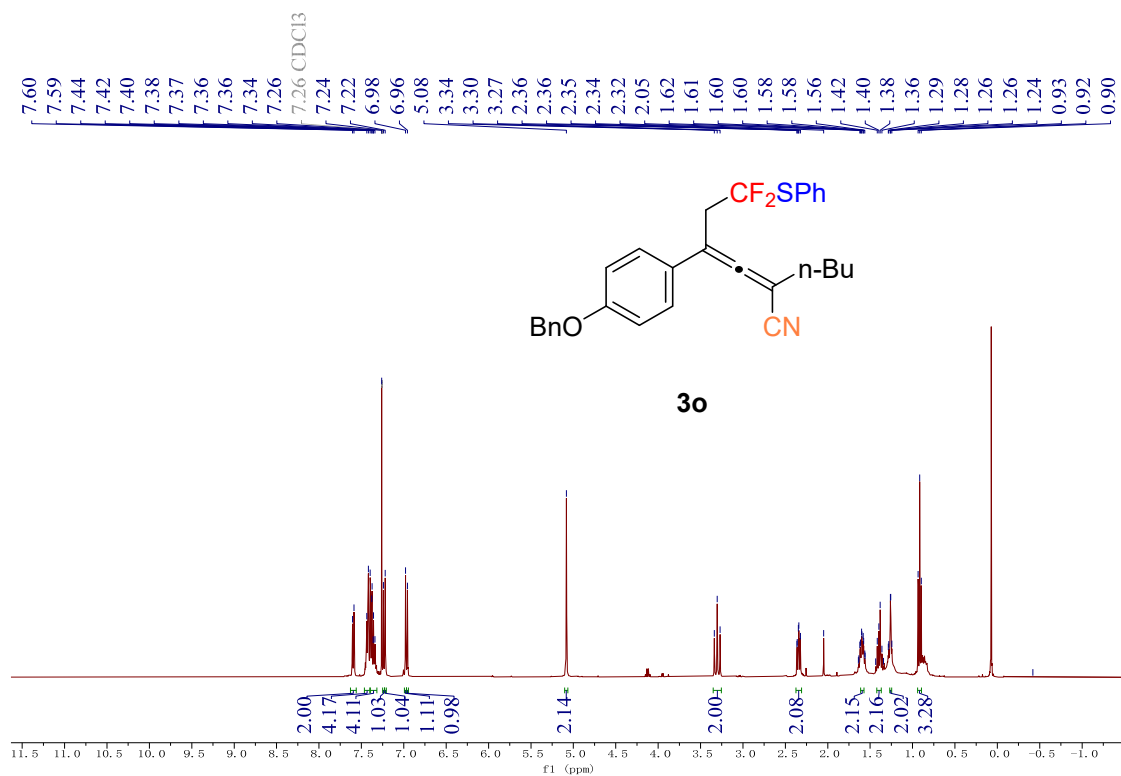

<sup>13</sup>C NMR (101 MHz, CDCl<sub>3</sub>)

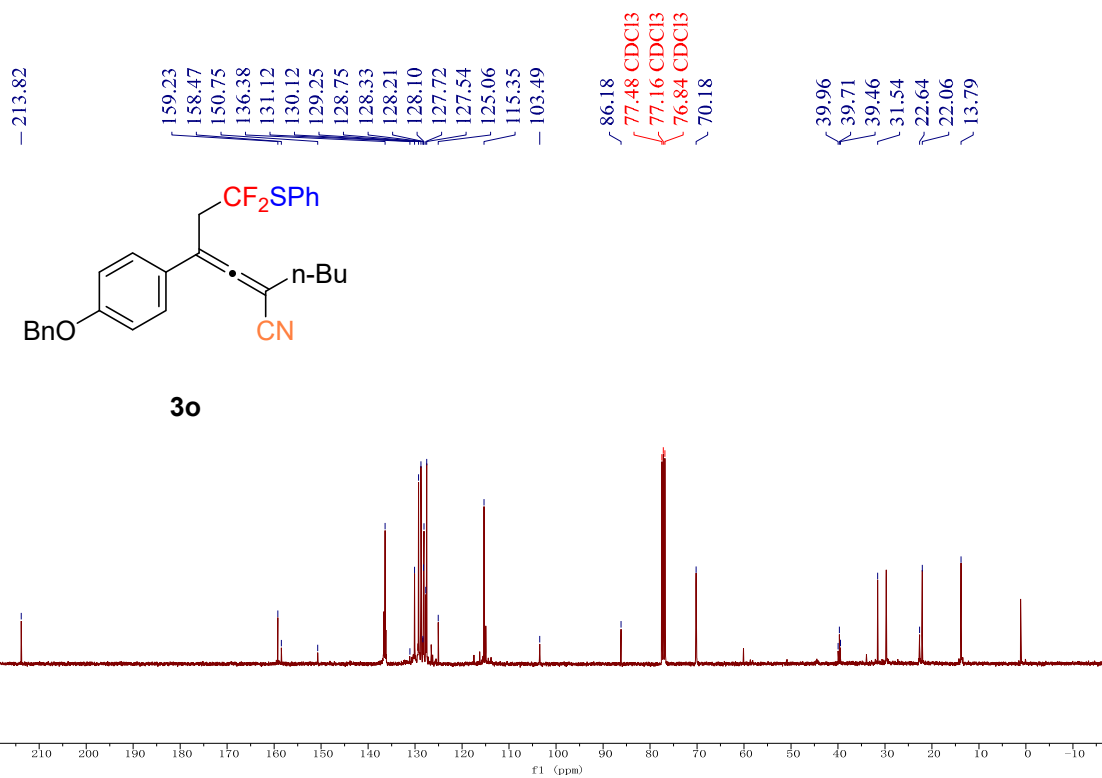

**$^{19}\text{F}$  NMR (376 MHz,  $\text{CDCl}_3$ )**

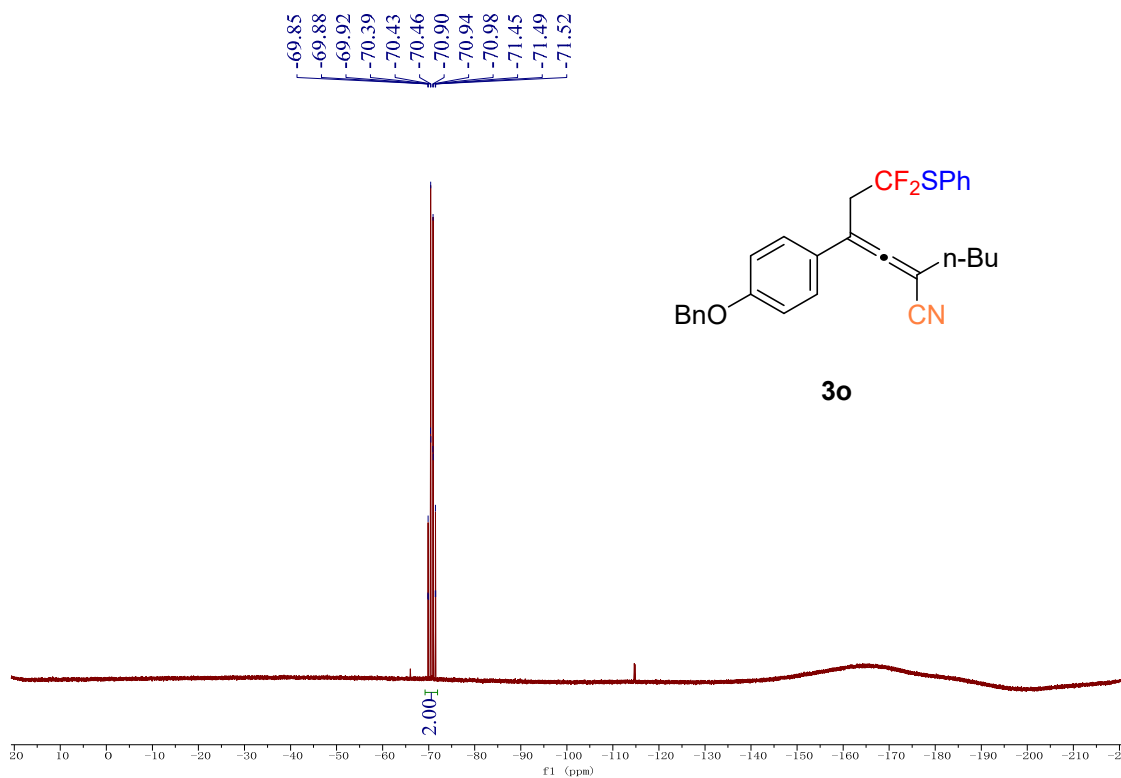

**$^1\text{H}$  NMR (400 MHz,  $\text{CDCl}_3$ )**



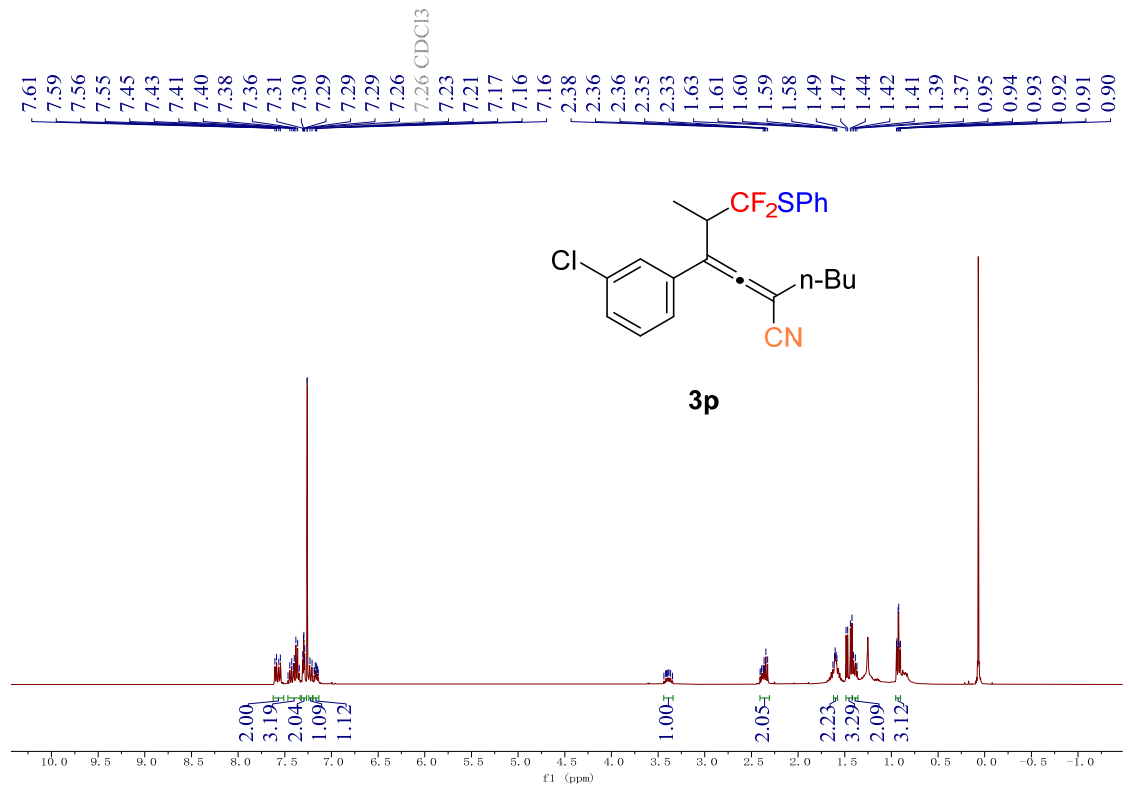

<sup>13</sup>C NMR (101 MHz, CDCl<sub>3</sub>)

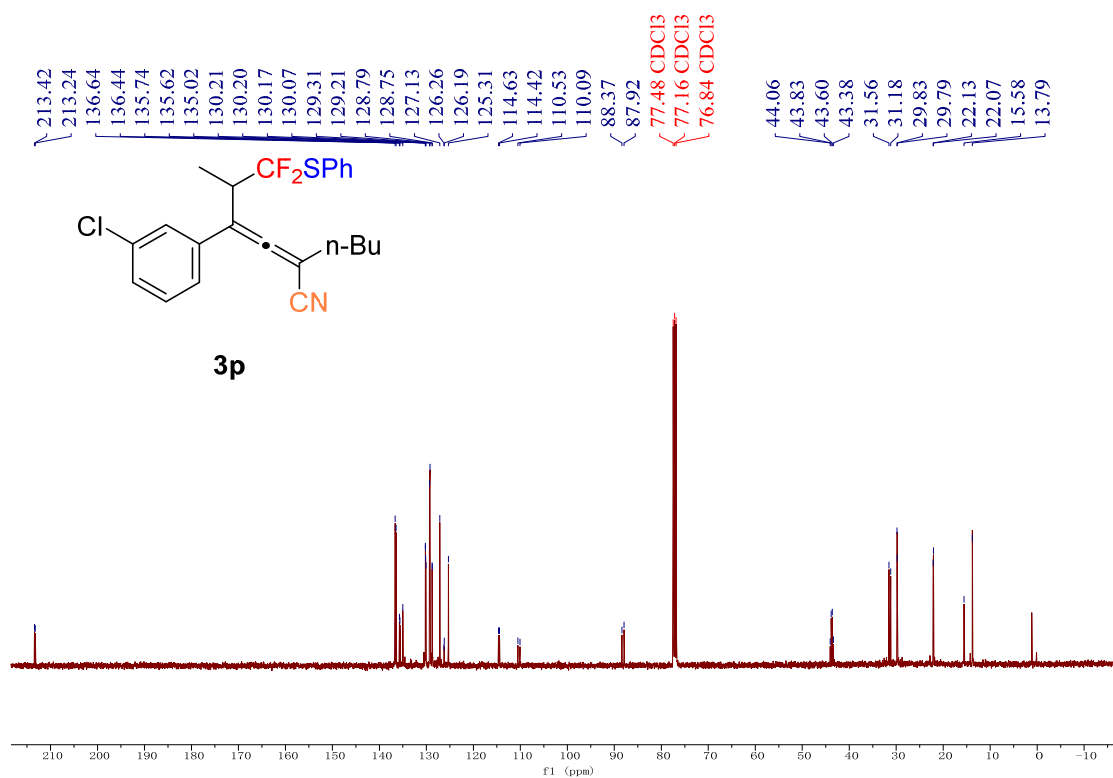

<sup>19</sup>F NMR (376 MHz, CDCl<sub>3</sub>)

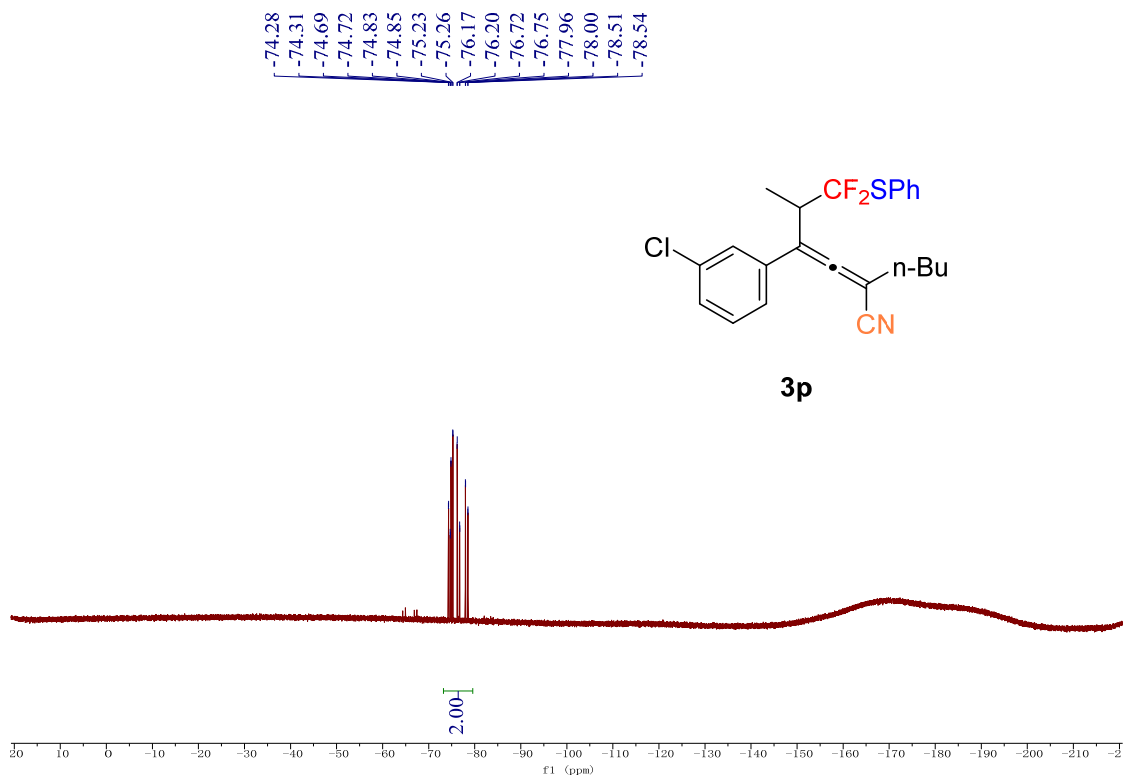

**<sup>1</sup>H NMR (400 MHz, CDCl<sub>3</sub>)**

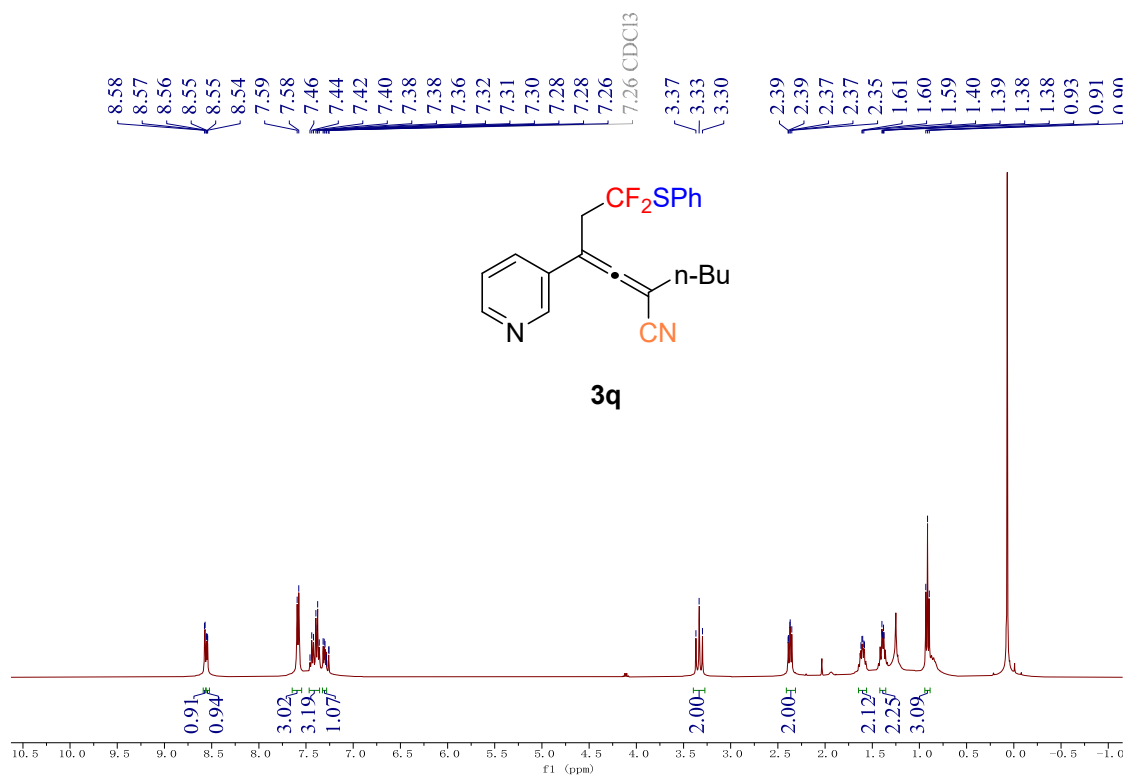

**<sup>13</sup>C NMR (101 MHz, CDCl<sub>3</sub>)**

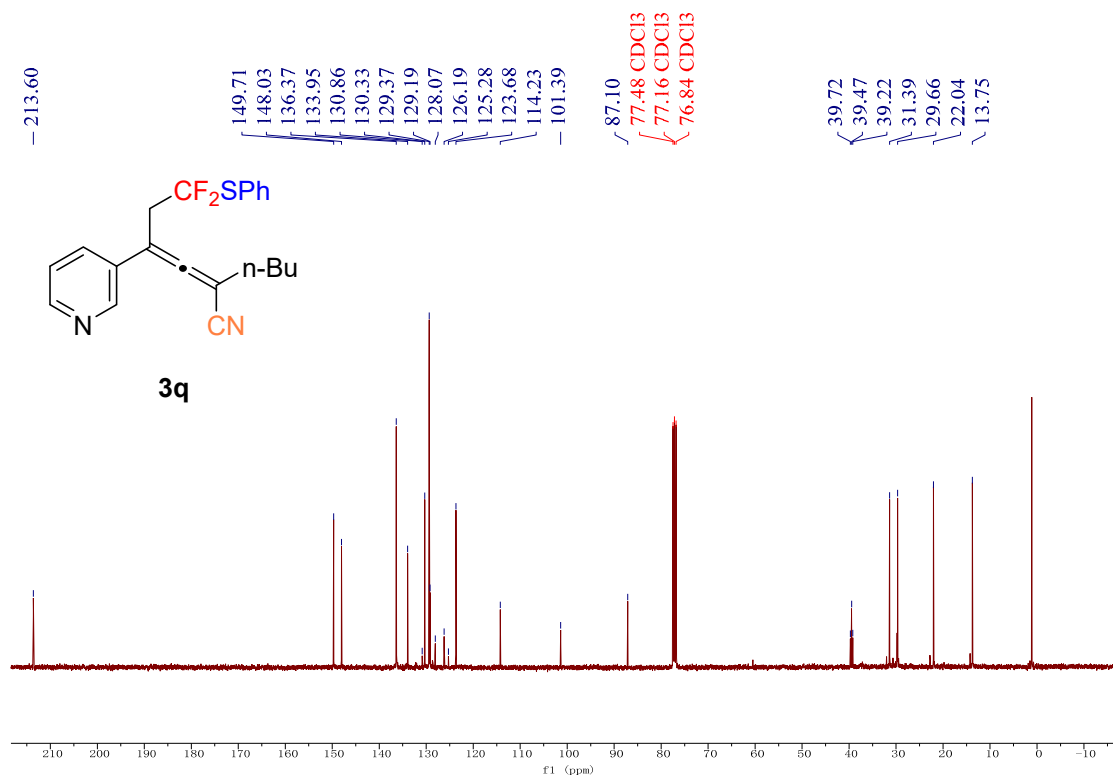

**$^{19}\text{F}$  NMR (376 MHz,  $\text{CDCl}_3$ )**

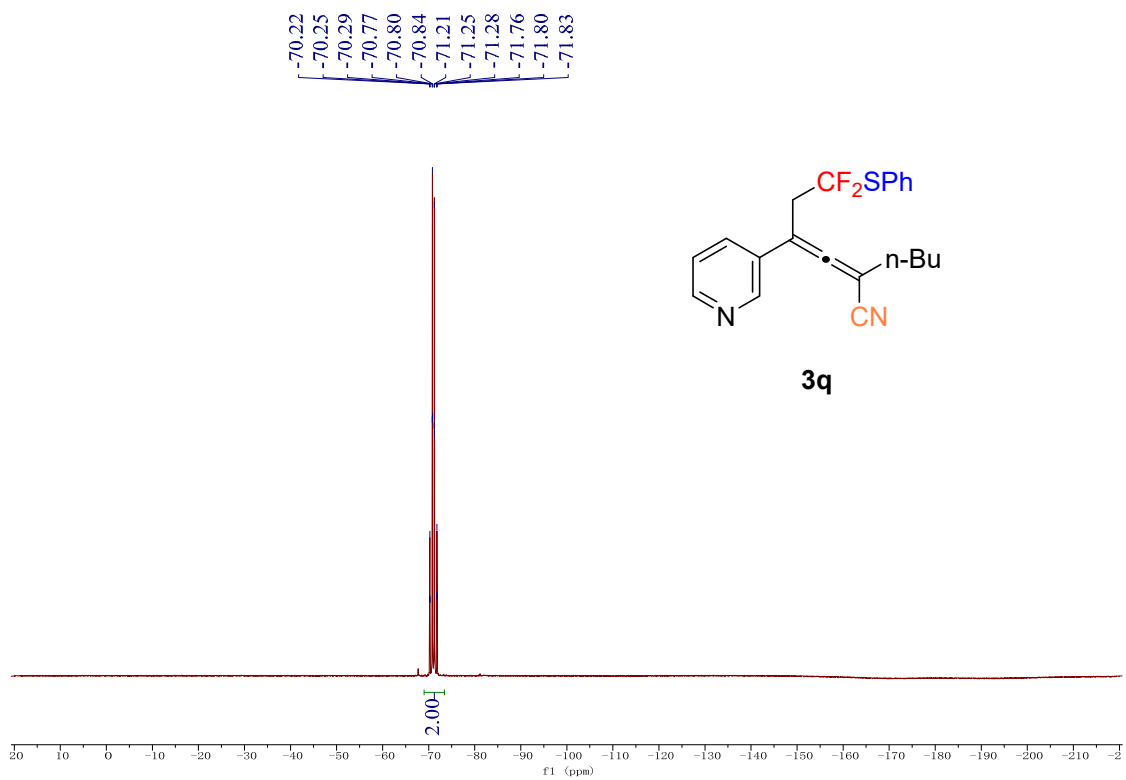

**$^1\text{H}$  NMR (400 MHz,  $\text{CDCl}_3$ )**

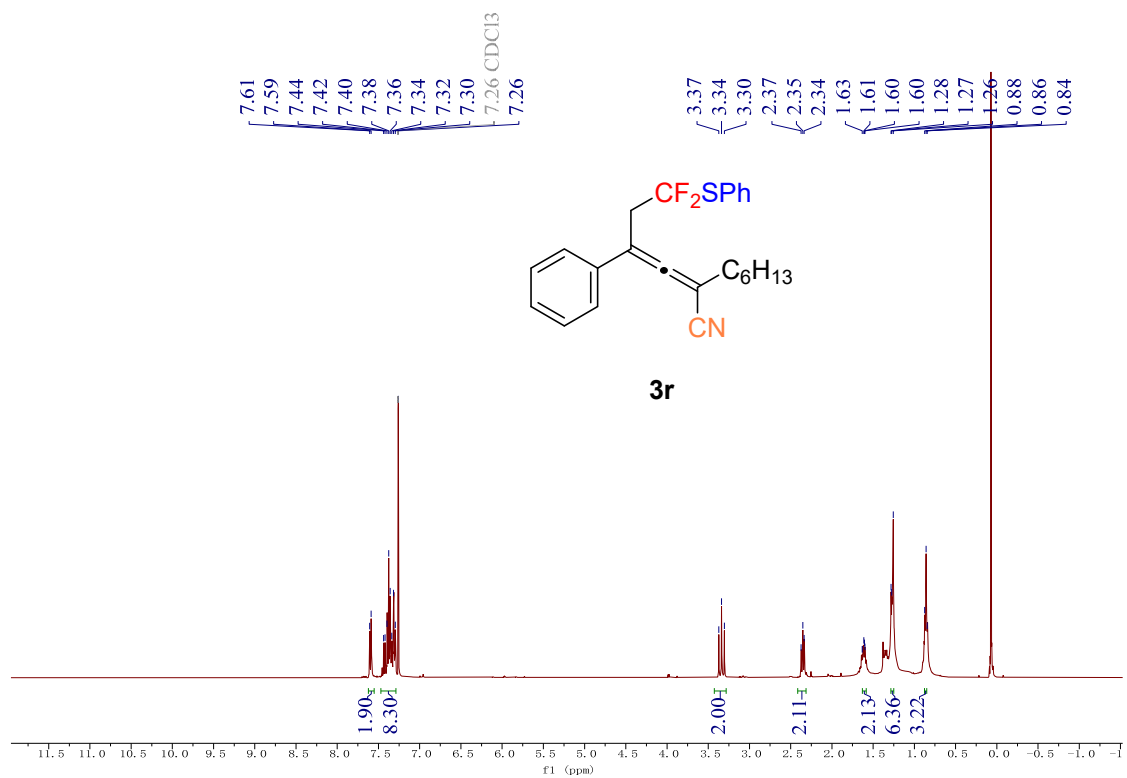

**$^{13}\text{C}$  NMR (101 MHz,  $\text{CDCl}_3$ )**

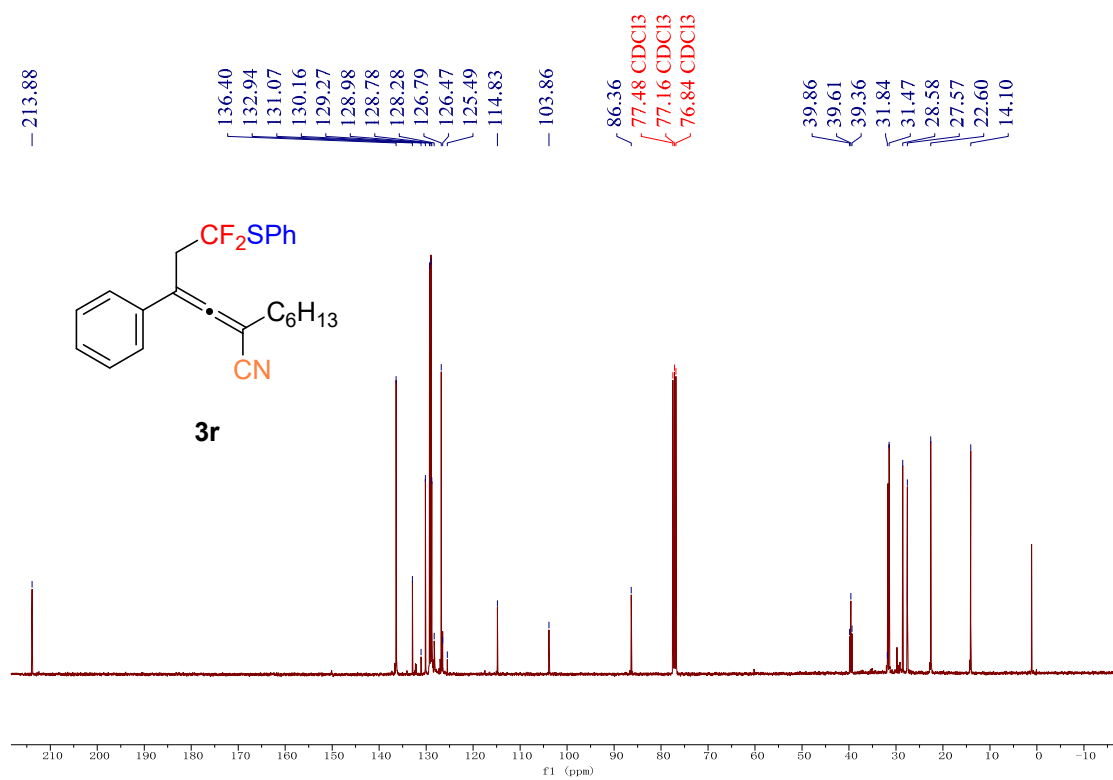

**$^{19}\text{F}$  NMR (376 MHz,  $\text{CDCl}_3$ )**



-69.95  
-69.99  
-70.02  
-70.50  
-70.53  
-70.57  
-71.06  
-71.10  
-71.14  
-71.61  
-71.65  
-71.69

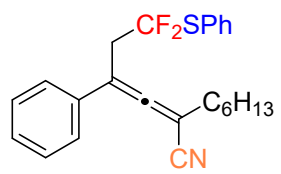

3r

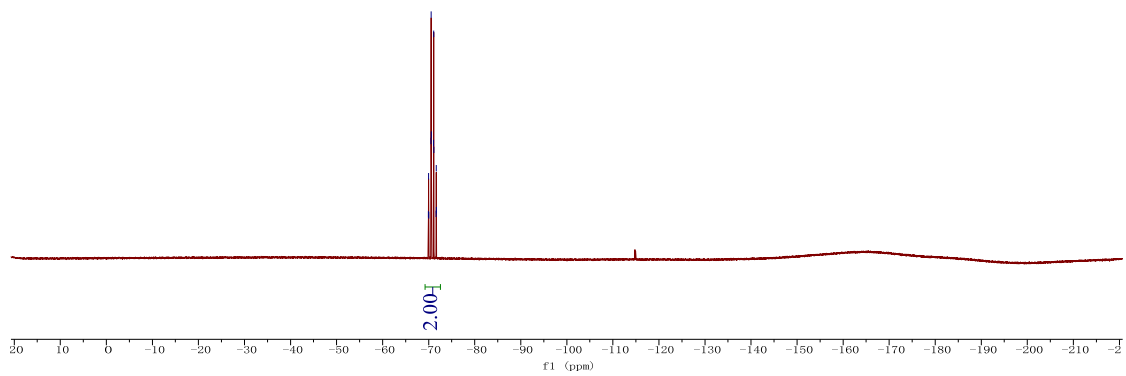

$^1\text{H}$  NMR (400 MHz,  $\text{CDCl}_3$ )

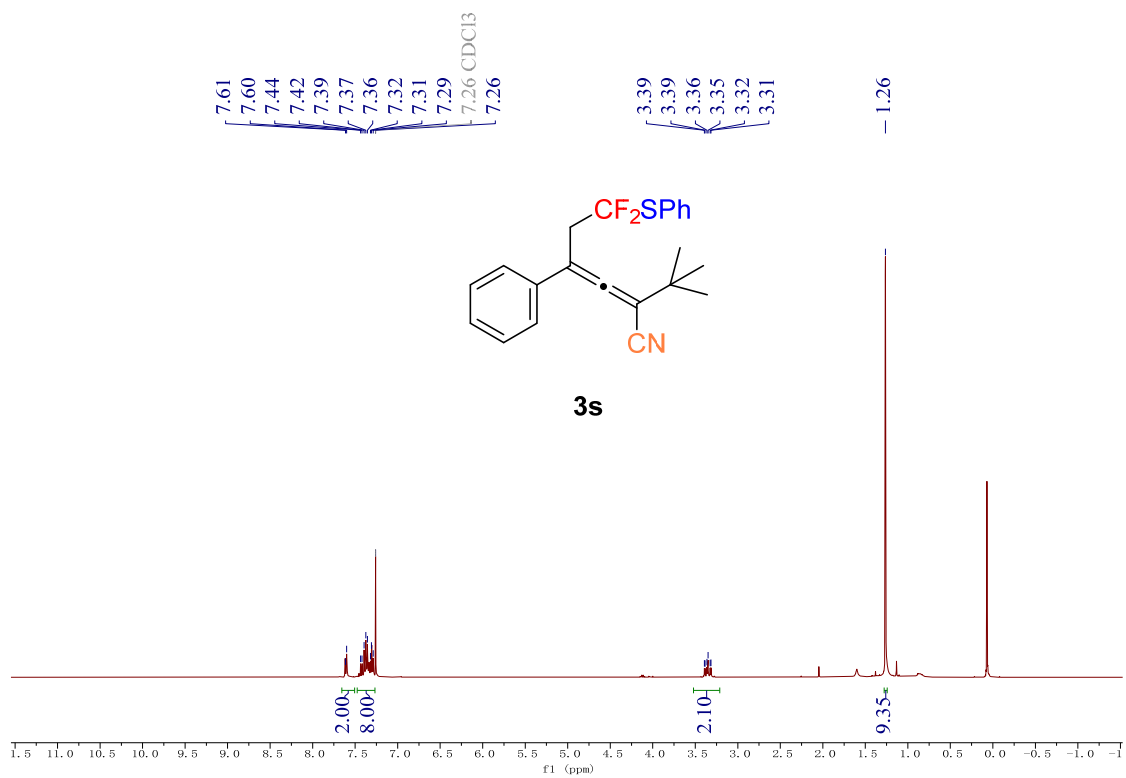

$^{13}\text{C}$  NMR (101 MHz,  $\text{CDCl}_3$ )

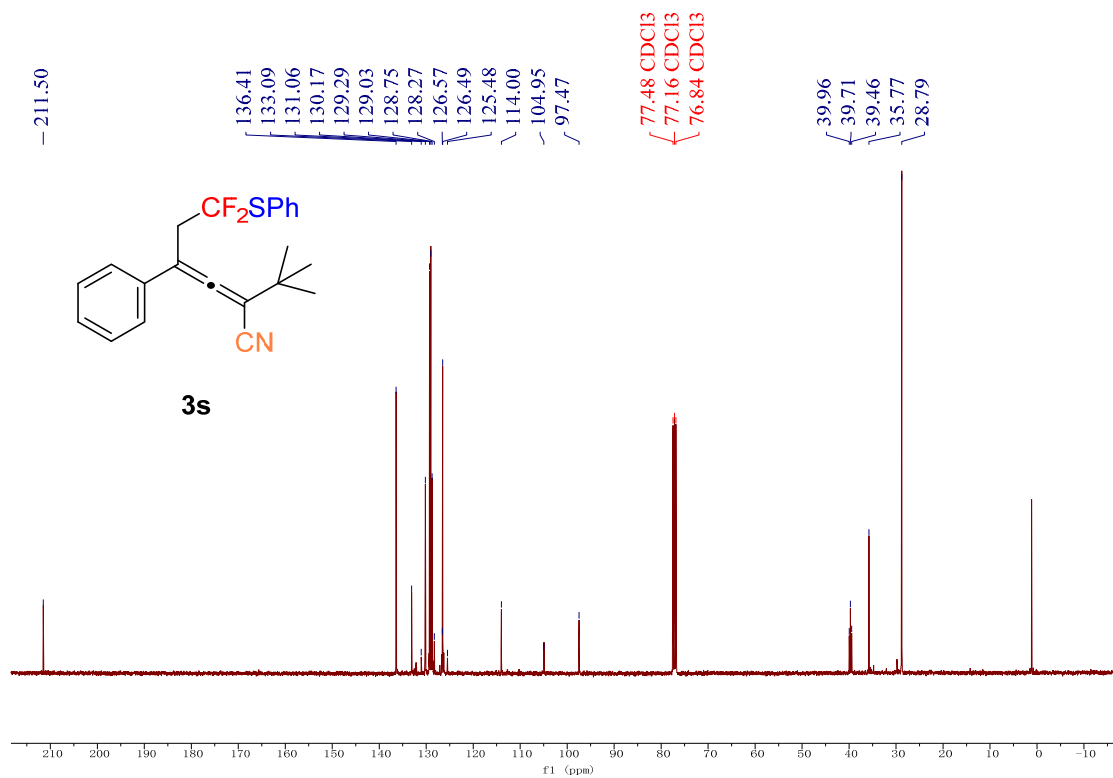

**$^{19}\text{F}$  NMR (376 MHz,  $\text{CDCl}_3$ )**

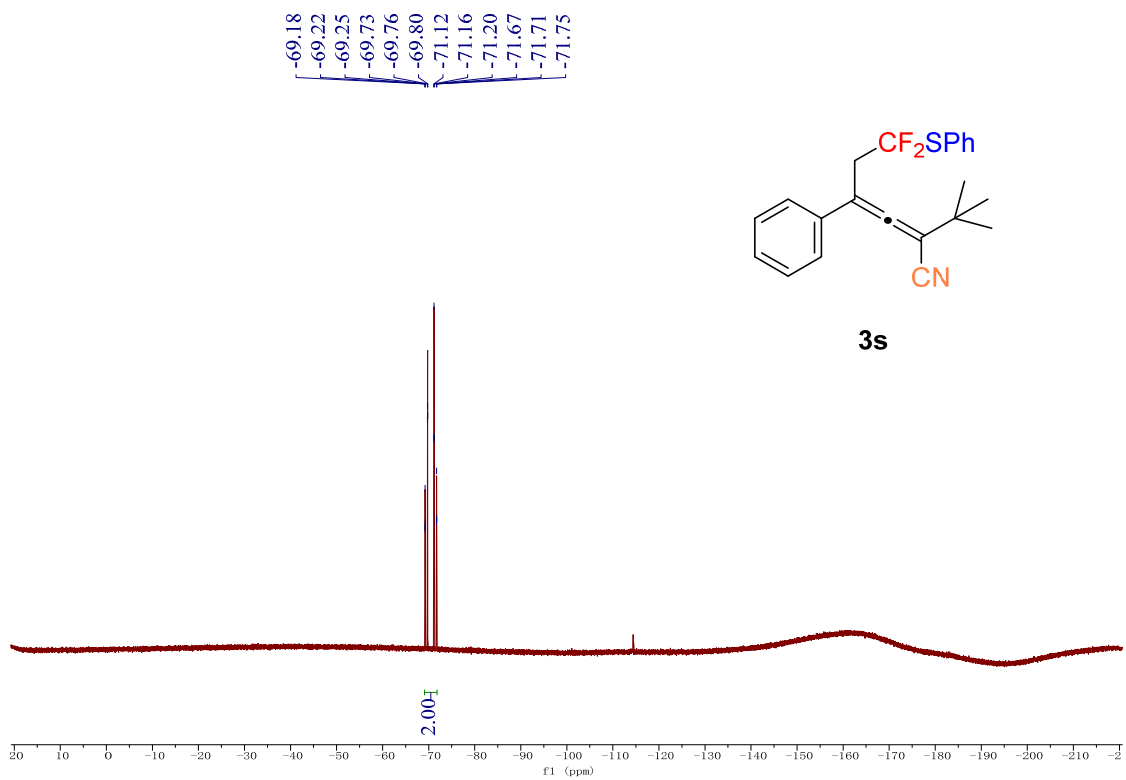

**$^1\text{H}$  NMR (400 MHz,  $\text{CDCl}_3$ )**

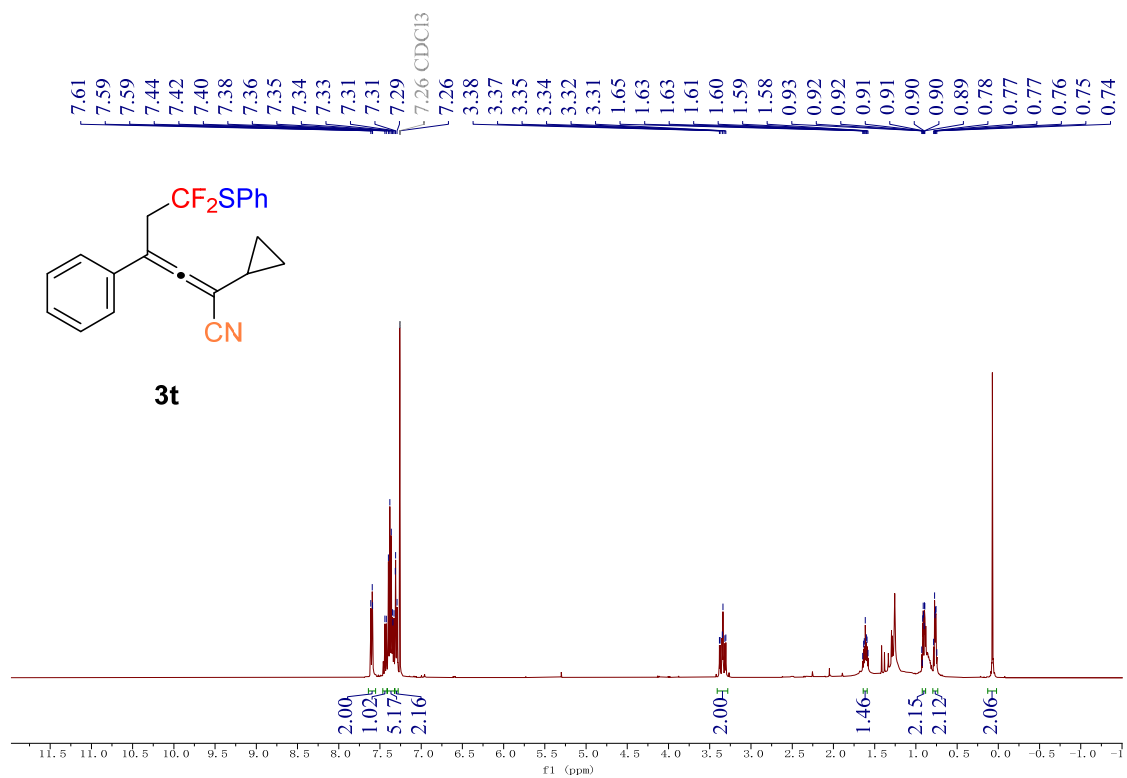

<sup>13</sup>C NMR (101 MHz, CDCl<sub>3</sub>)

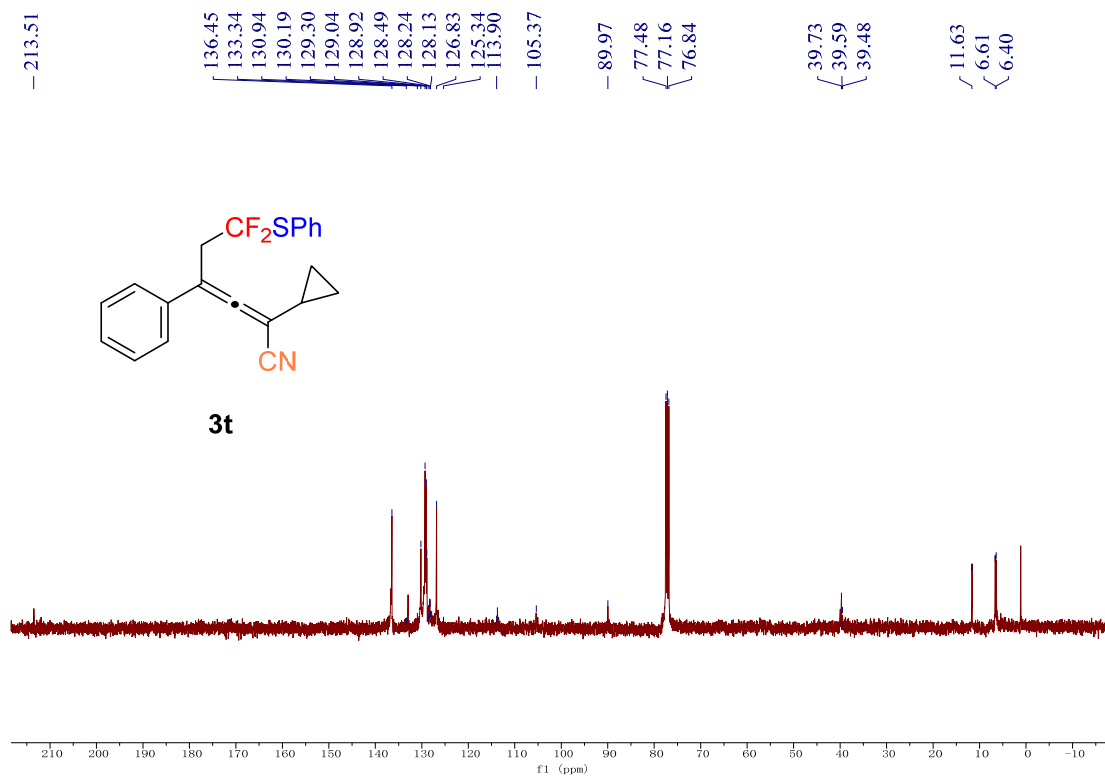

<sup>19</sup>F NMR (376 MHz, CDCl<sub>3</sub>)

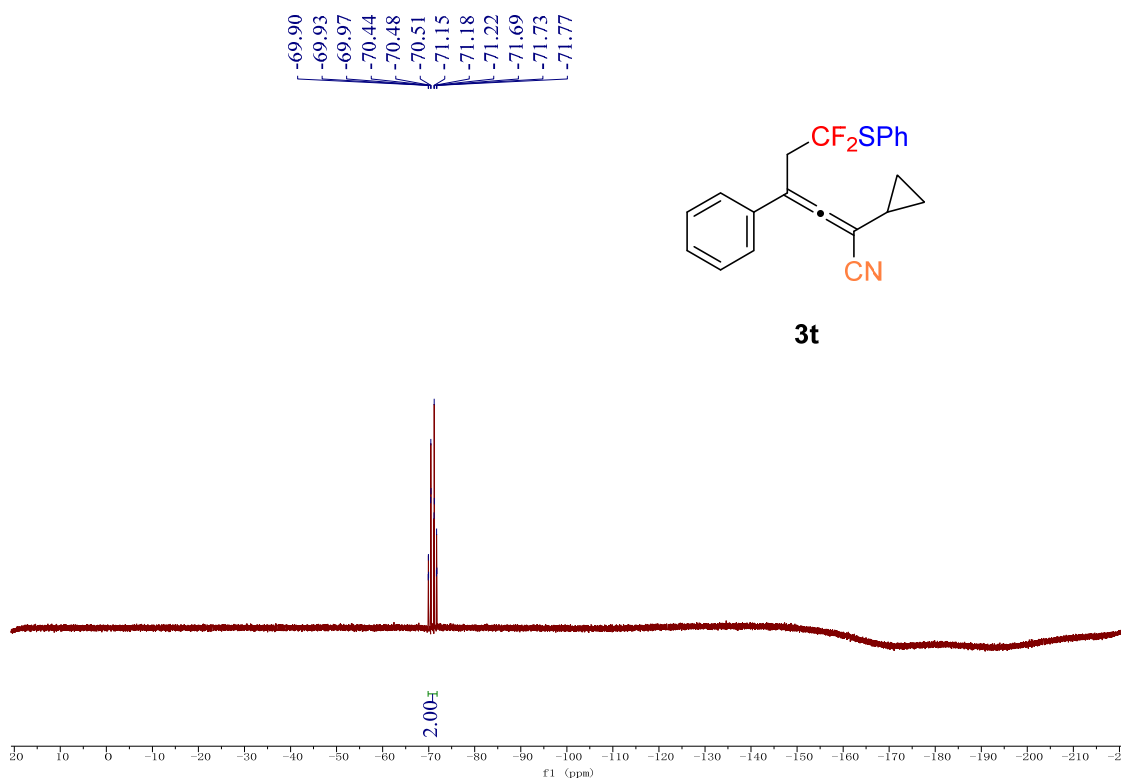

$^1\text{H}$  NMR (400 MHz,  $\text{CDCl}_3$ )

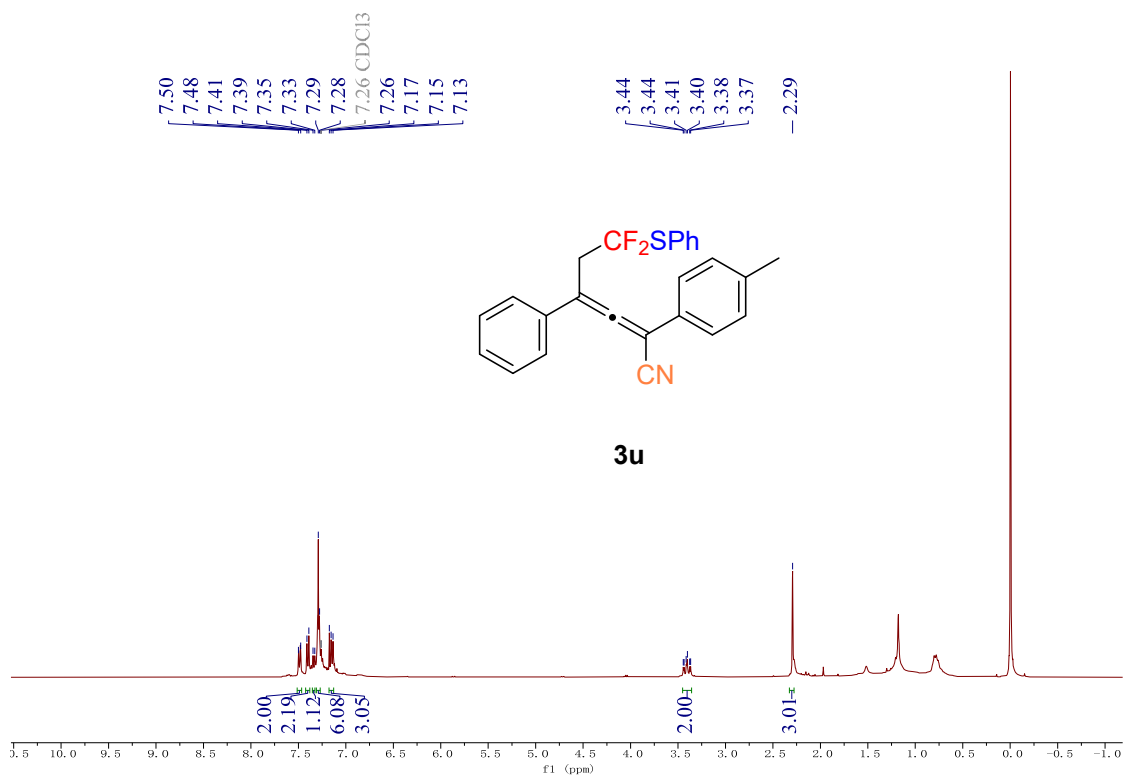

$^{13}\text{C}$  NMR (101 MHz,  $\text{CDCl}_3$ )

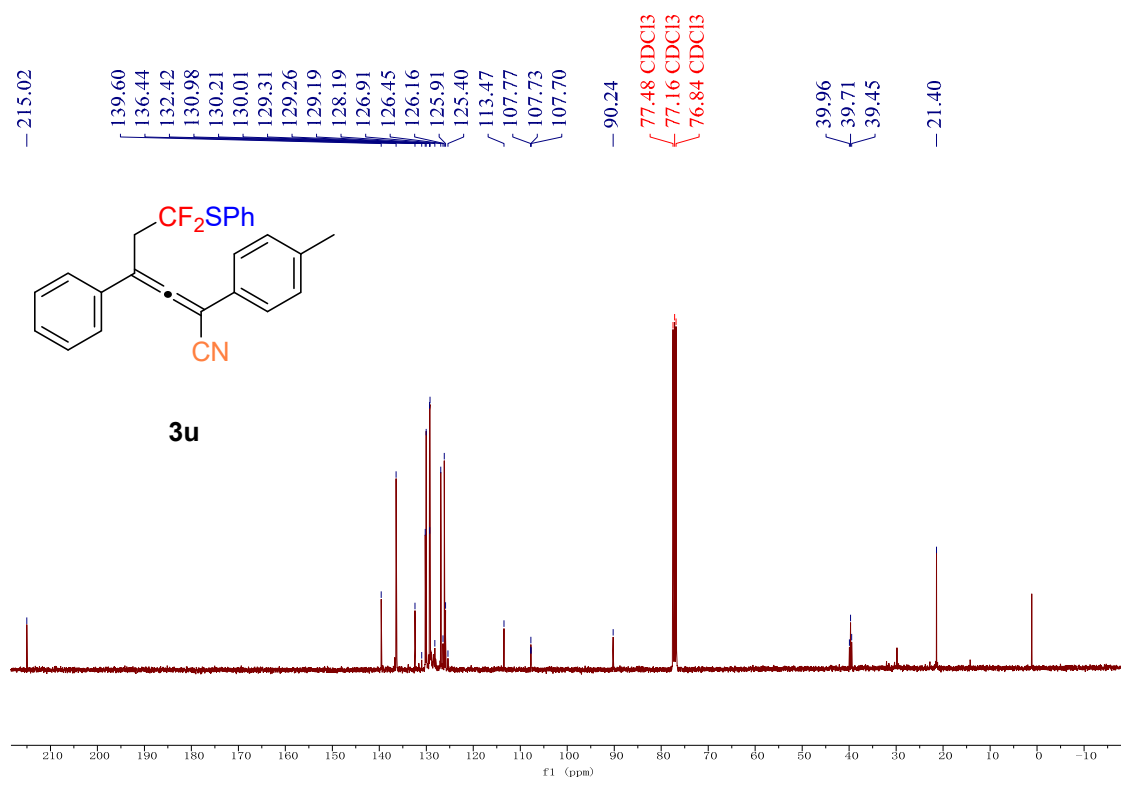



**$^{19}\text{F}$  NMR (376 MHz,  $\text{CDCl}_3$ )**

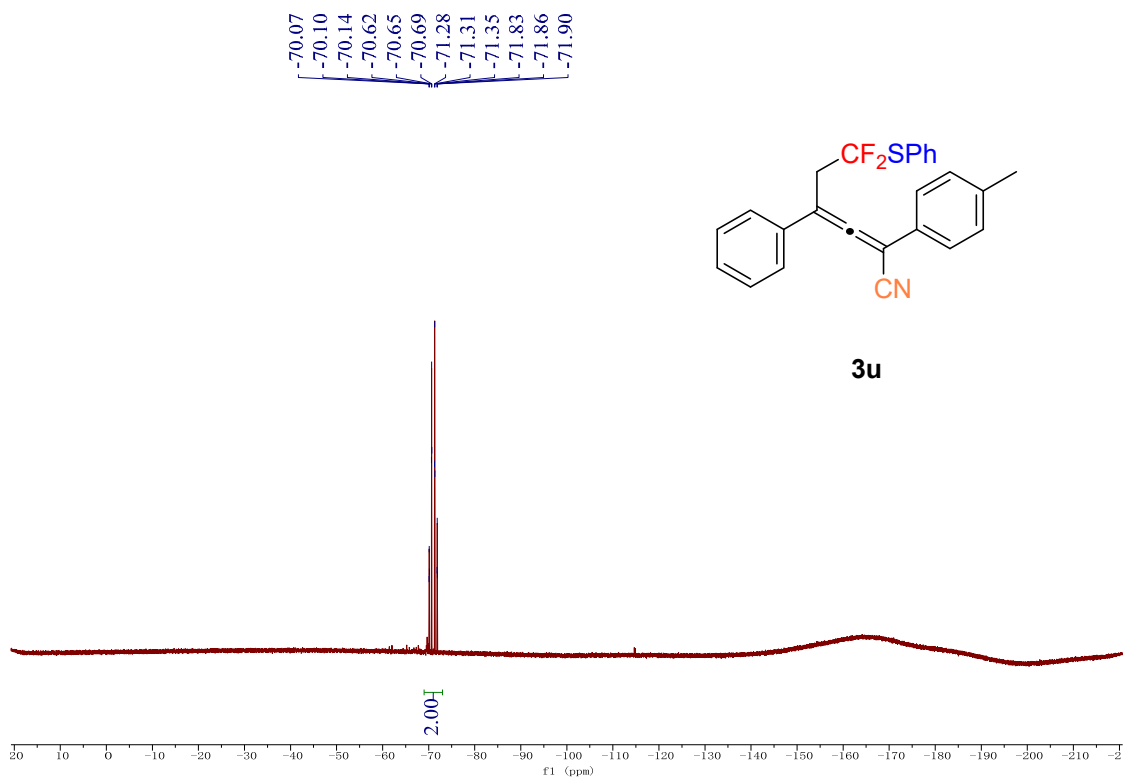

**$^1\text{H}$  NMR (400 MHz,  $\text{CDCl}_3$ )**

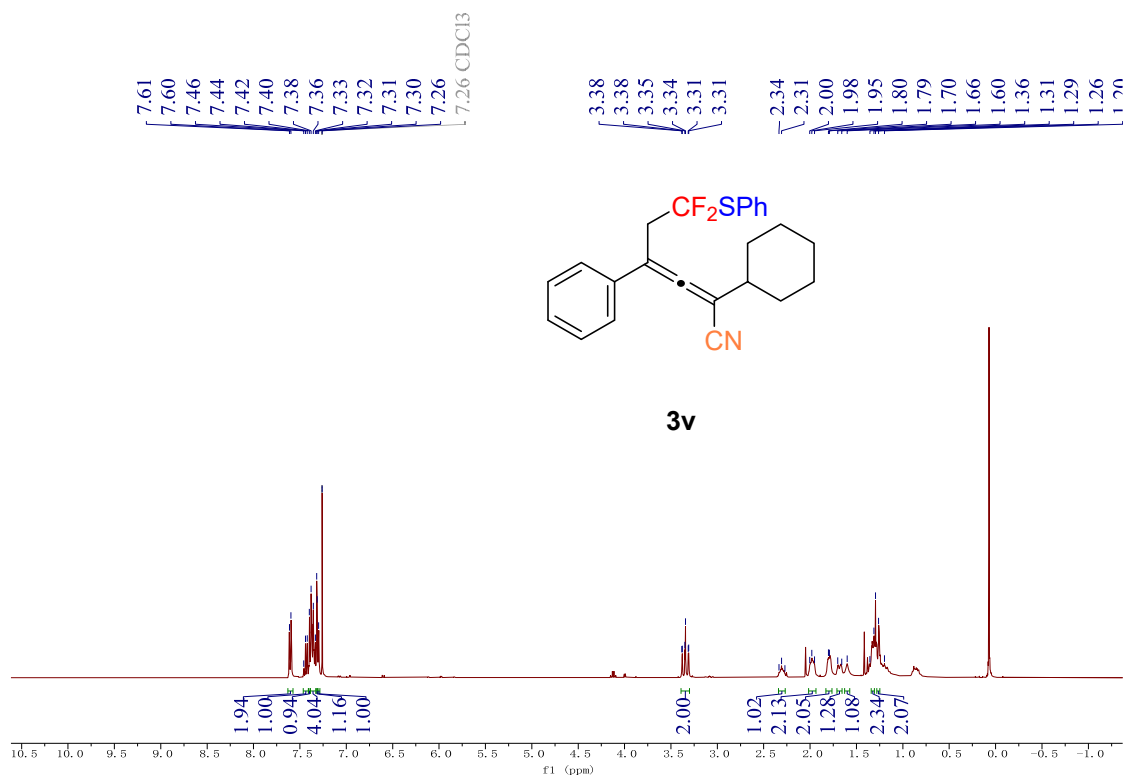

**<sup>13</sup>C NMR (101 MHz, CDCl<sub>3</sub>)**

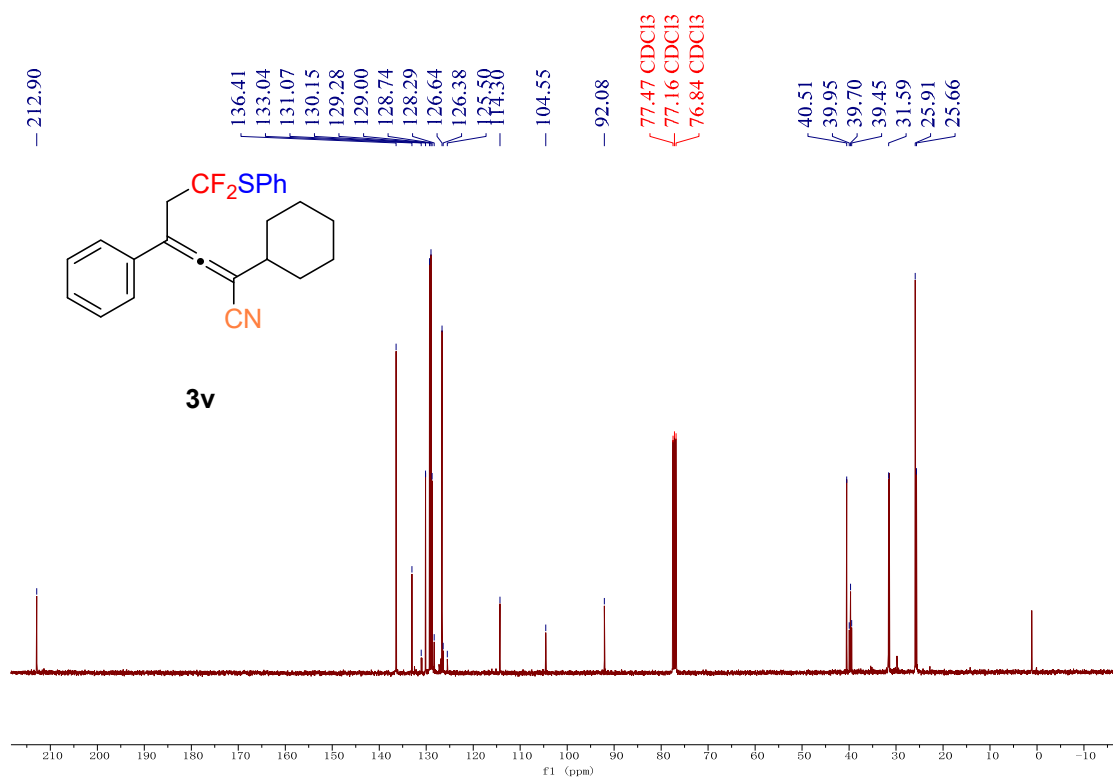

**<sup>19</sup>F NMR (376 MHz, CDCl<sub>3</sub>)**

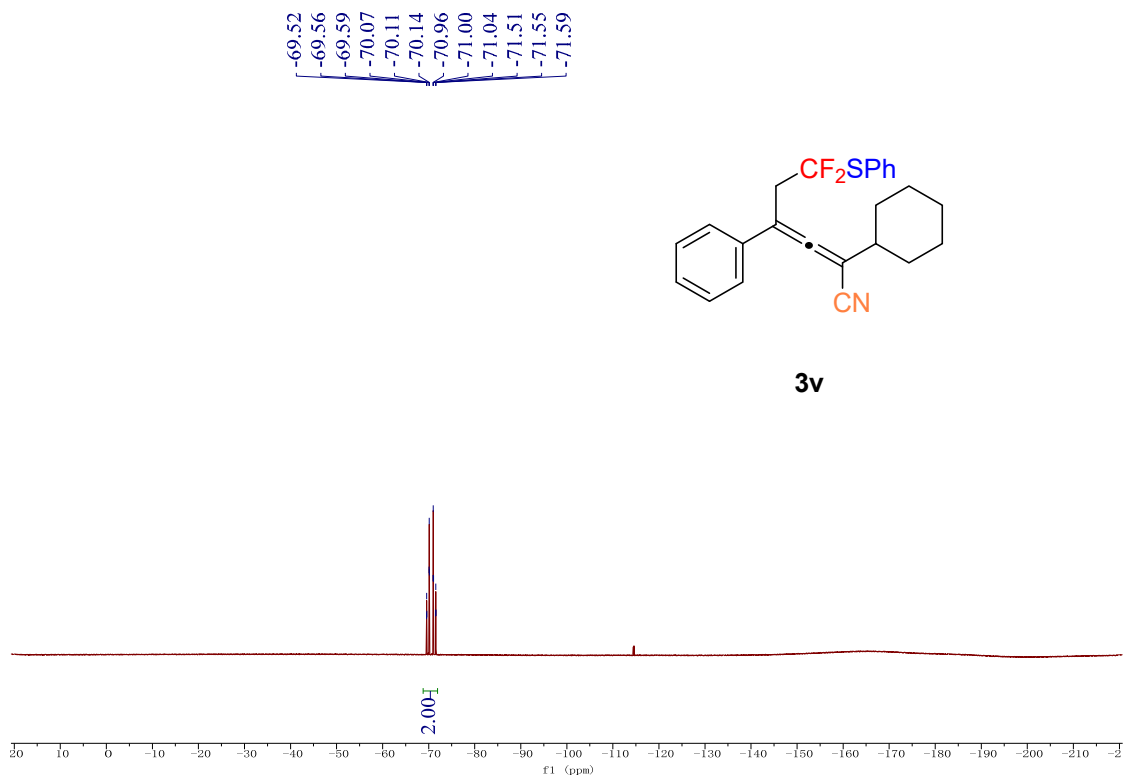

<sup>1</sup>H NMR (400 MHz, CDCl<sub>3</sub>)

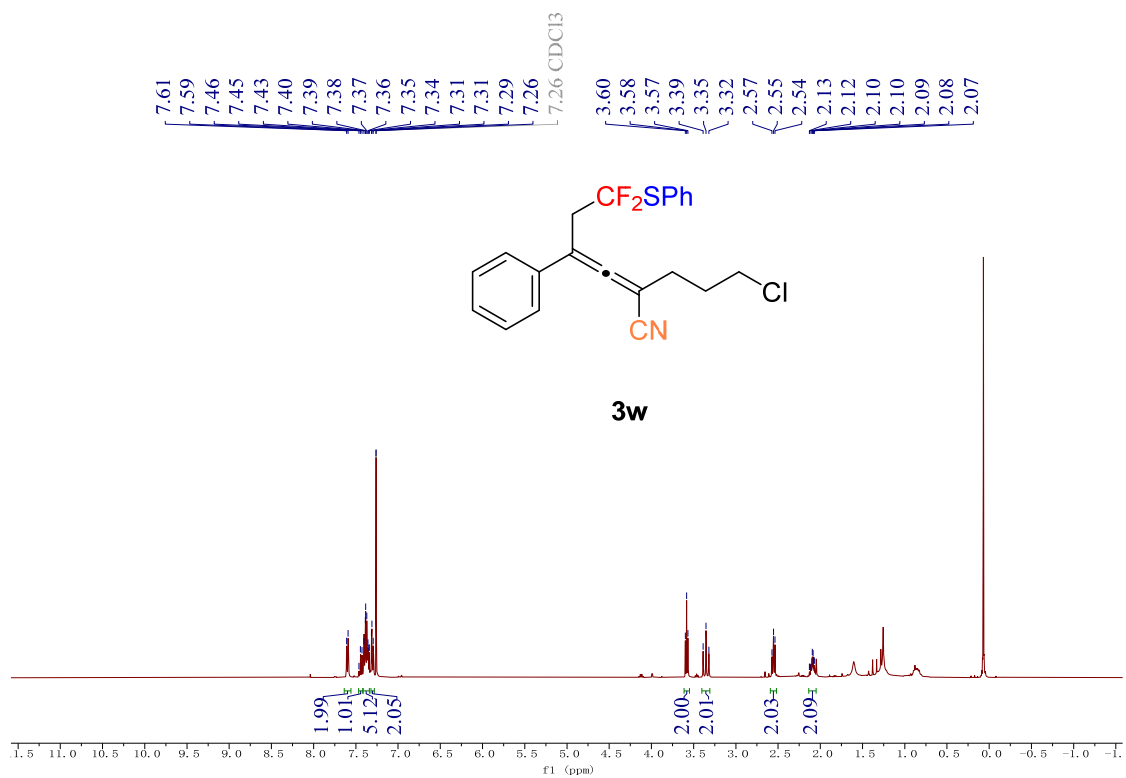

$^{13}\text{C}$  NMR (101 MHz,  $\text{CDCl}_3$ )

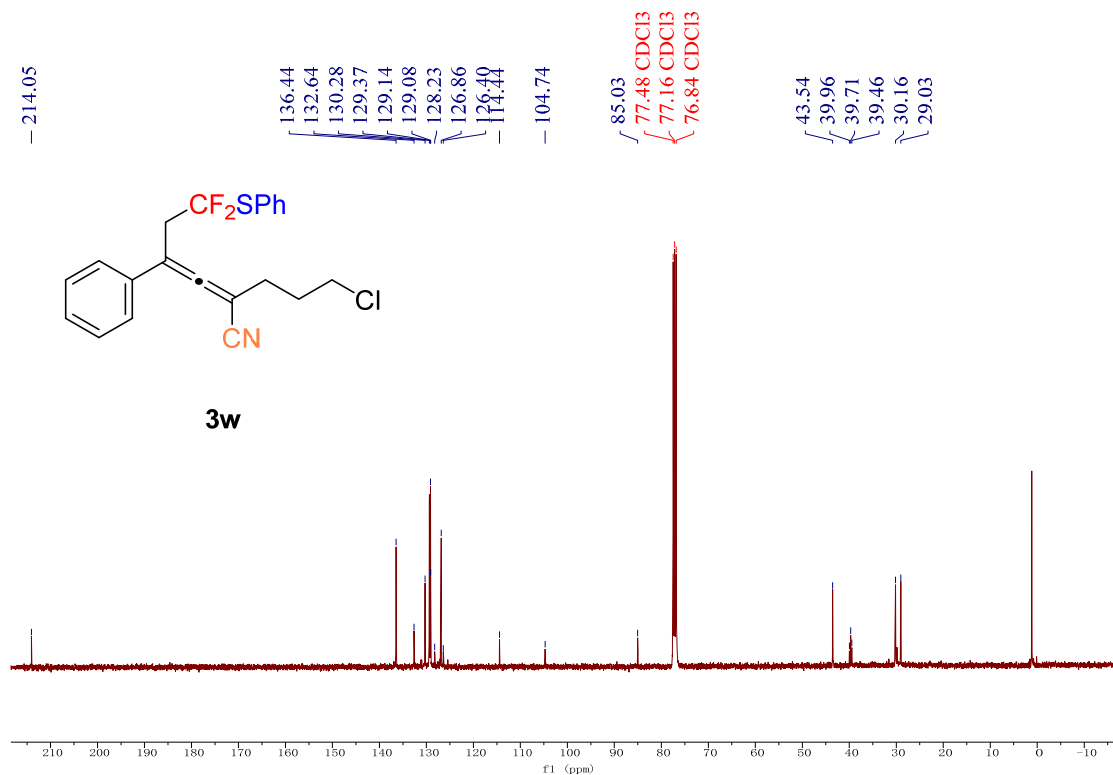

$^{19}\text{F}$  NMR (376 MHz,  $\text{CDCl}_3$ )

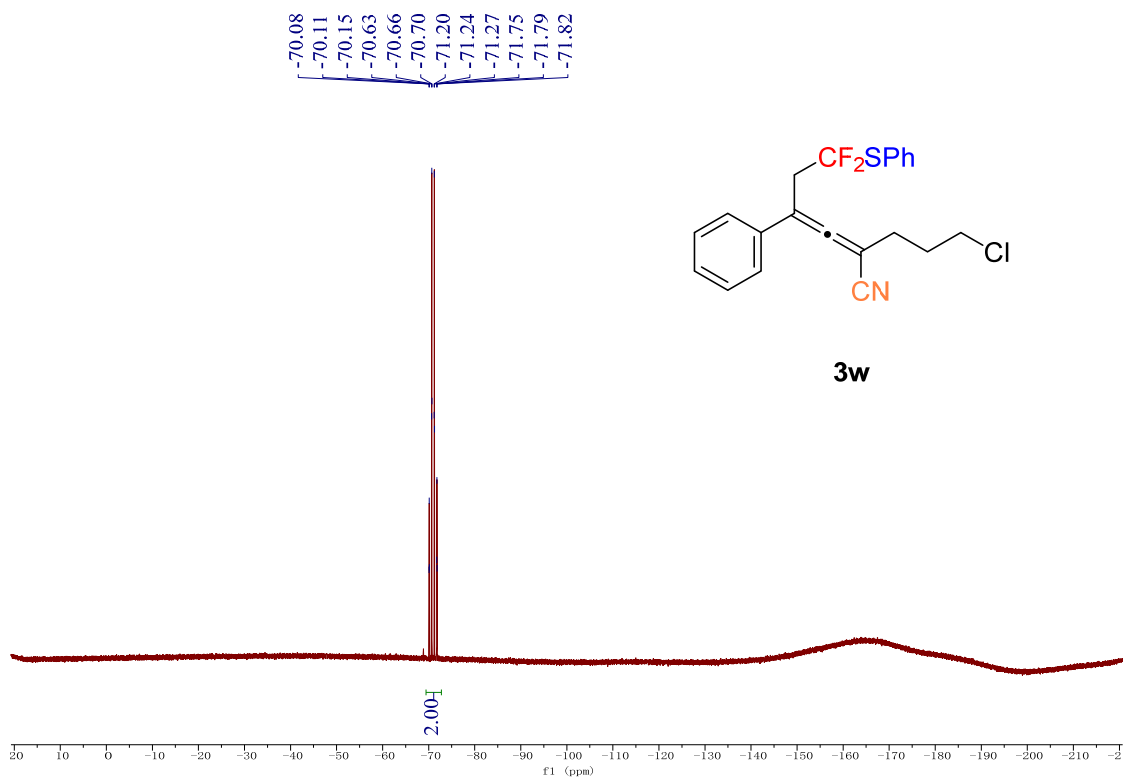

$^1\text{H}$  NMR (400 MHz,  $\text{CDCl}_3$ )

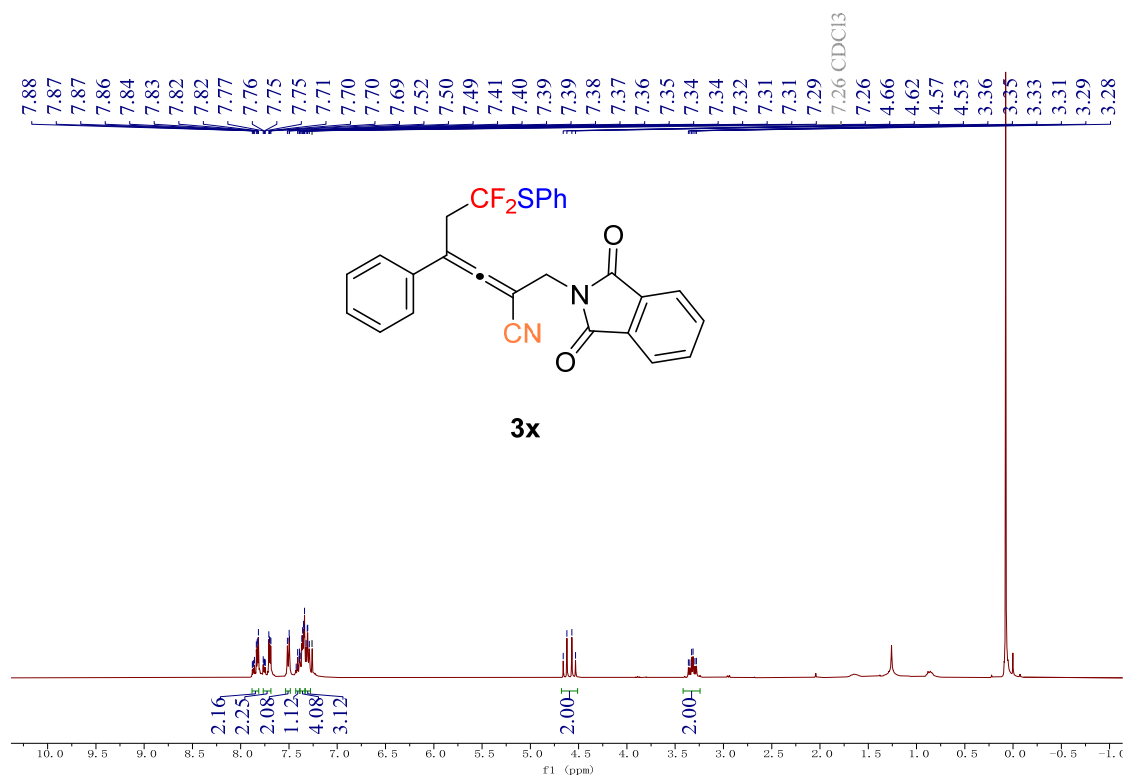

<sup>13</sup>C NMR (101 MHz, CDCl<sub>3</sub>)

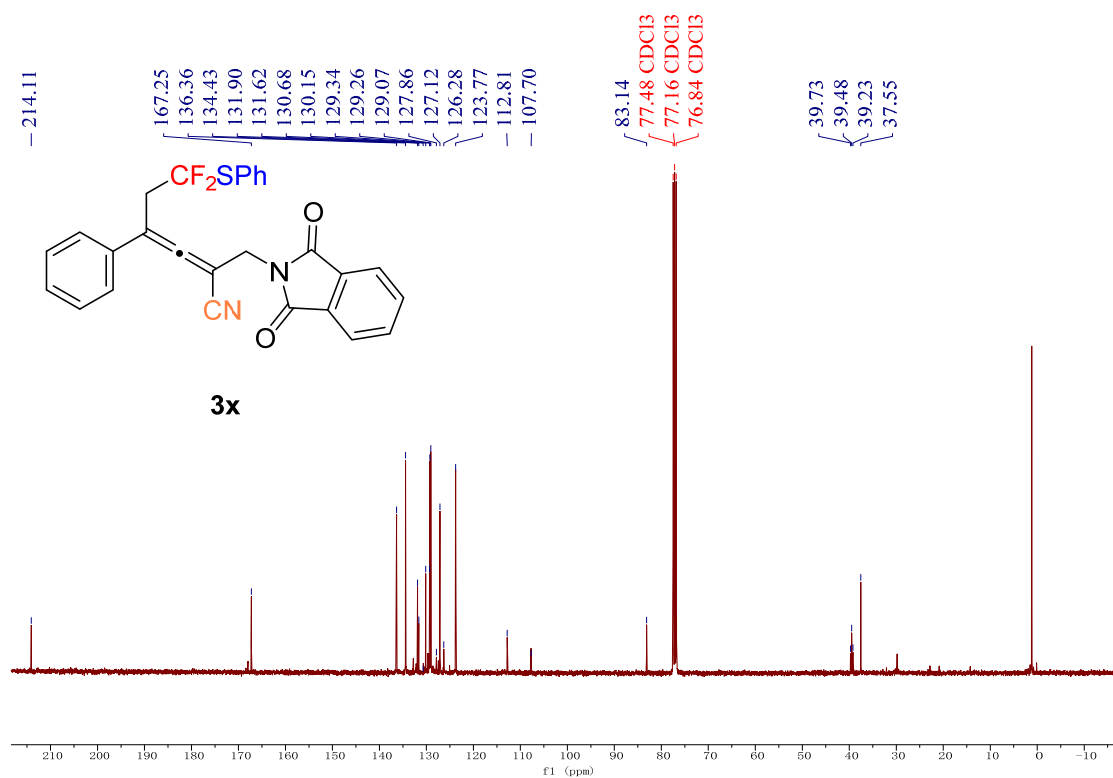

<sup>19</sup>F NMR (376 MHz, CDCl<sub>3</sub>)



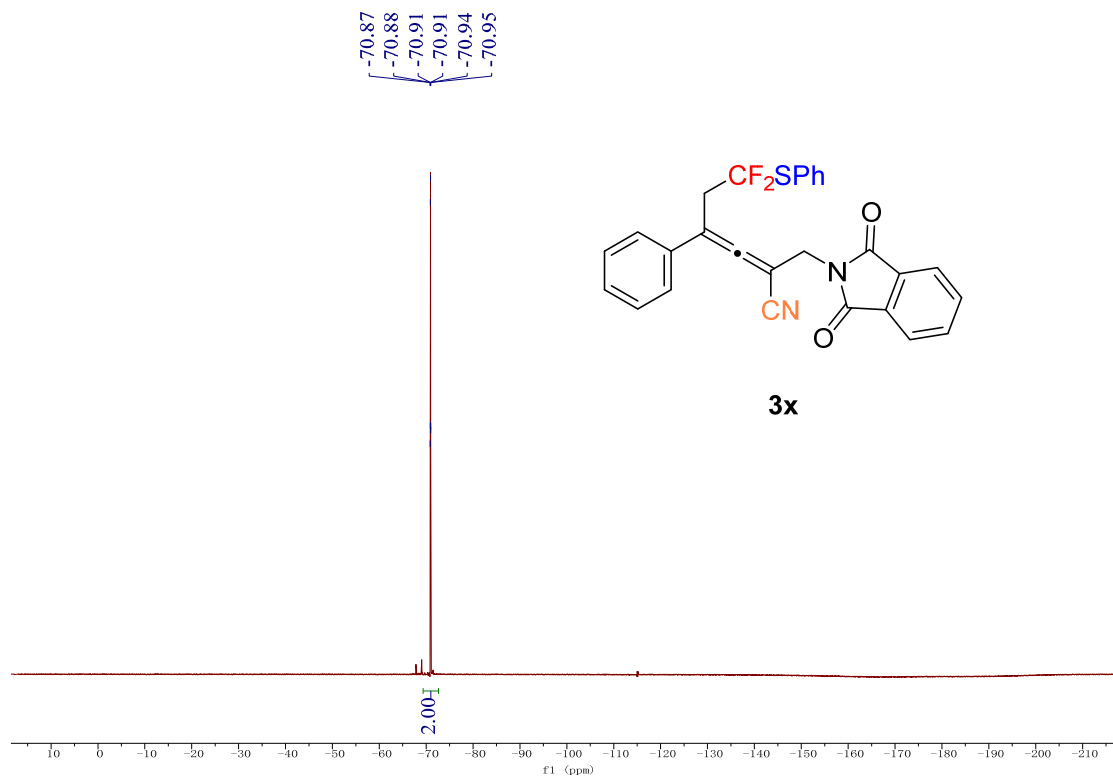

<sup>1</sup>H NMR (400 MHz, CDCl<sub>3</sub>)

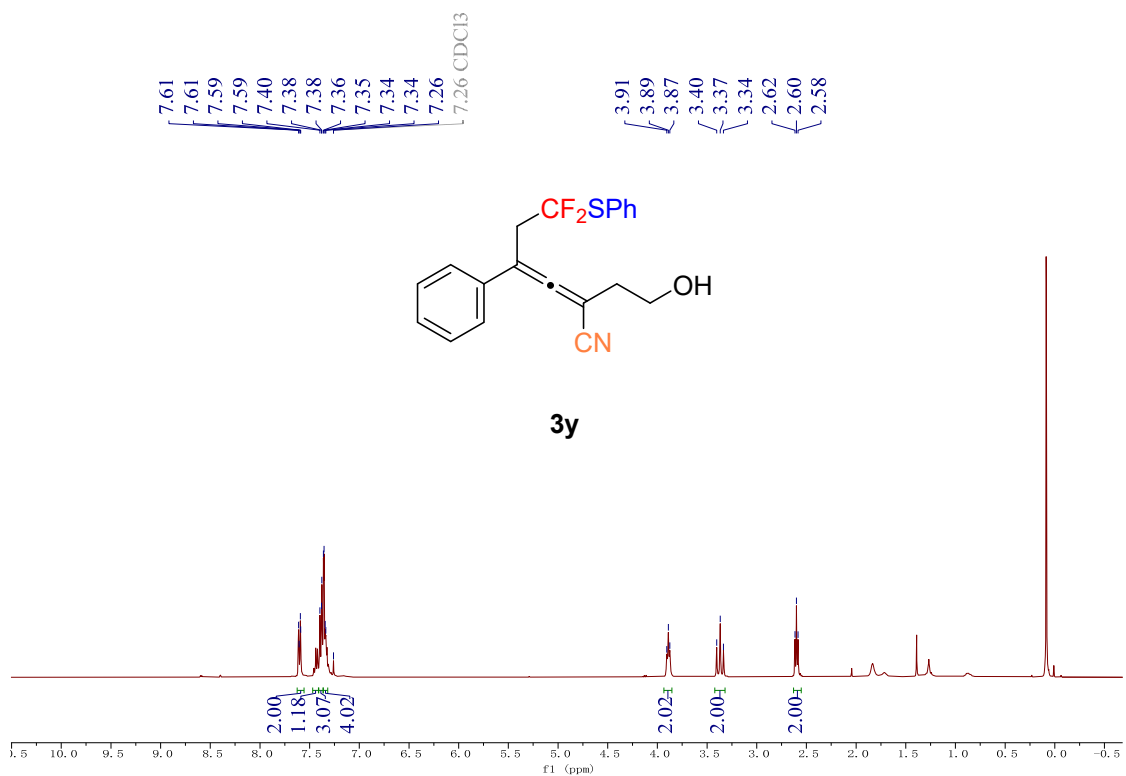

<sup>13</sup>C NMR (101 MHz, CDCl<sub>3</sub>)

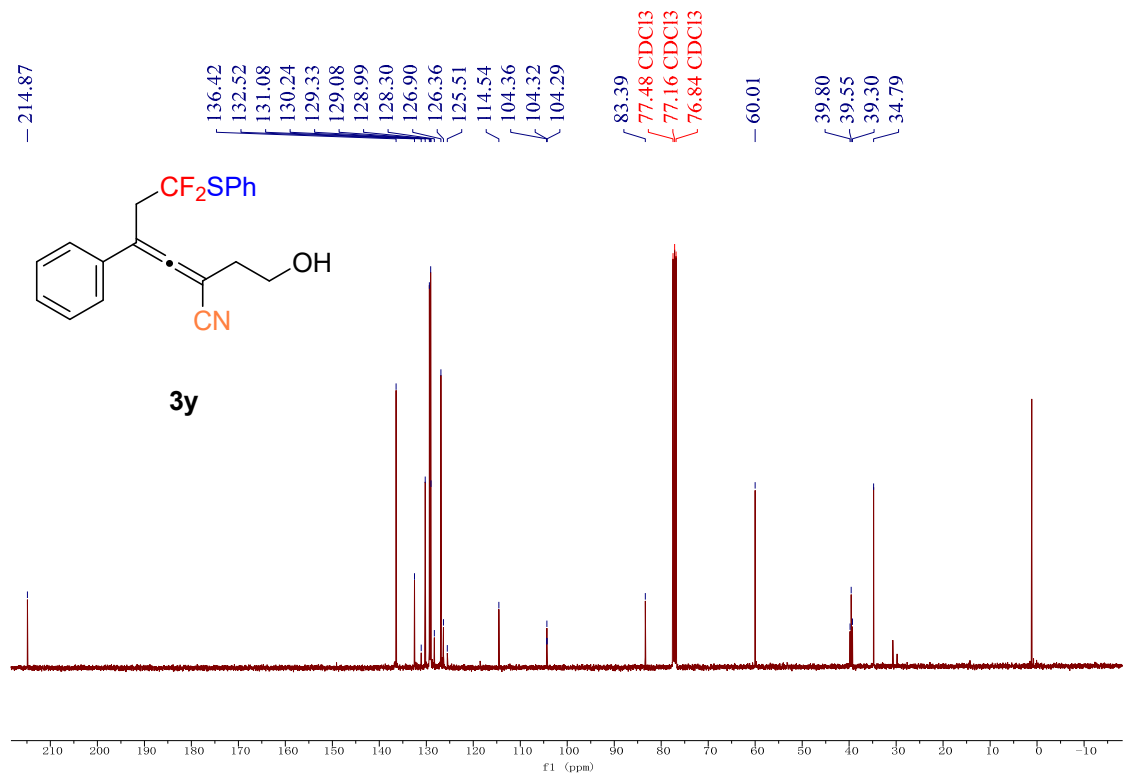

<sup>19</sup>F NMR (376 MHz, CDCl<sub>3</sub>)

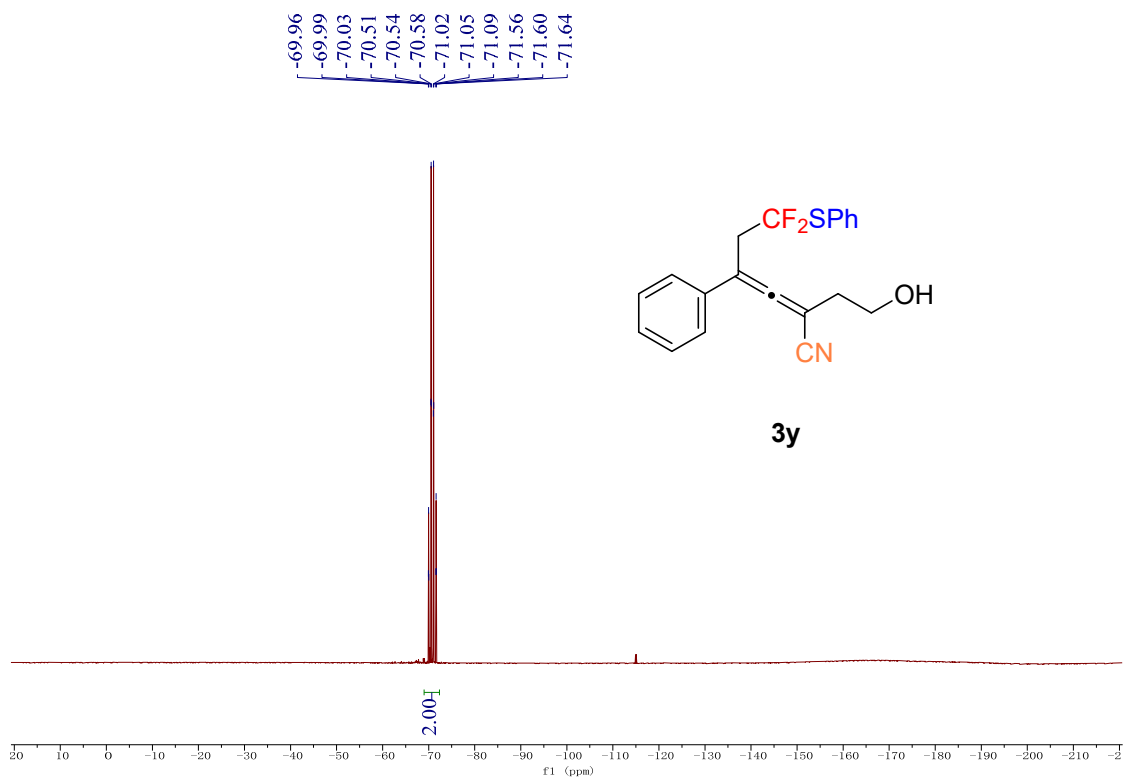

<sup>1</sup>H NMR (400 MHz, CDCl<sub>3</sub>)

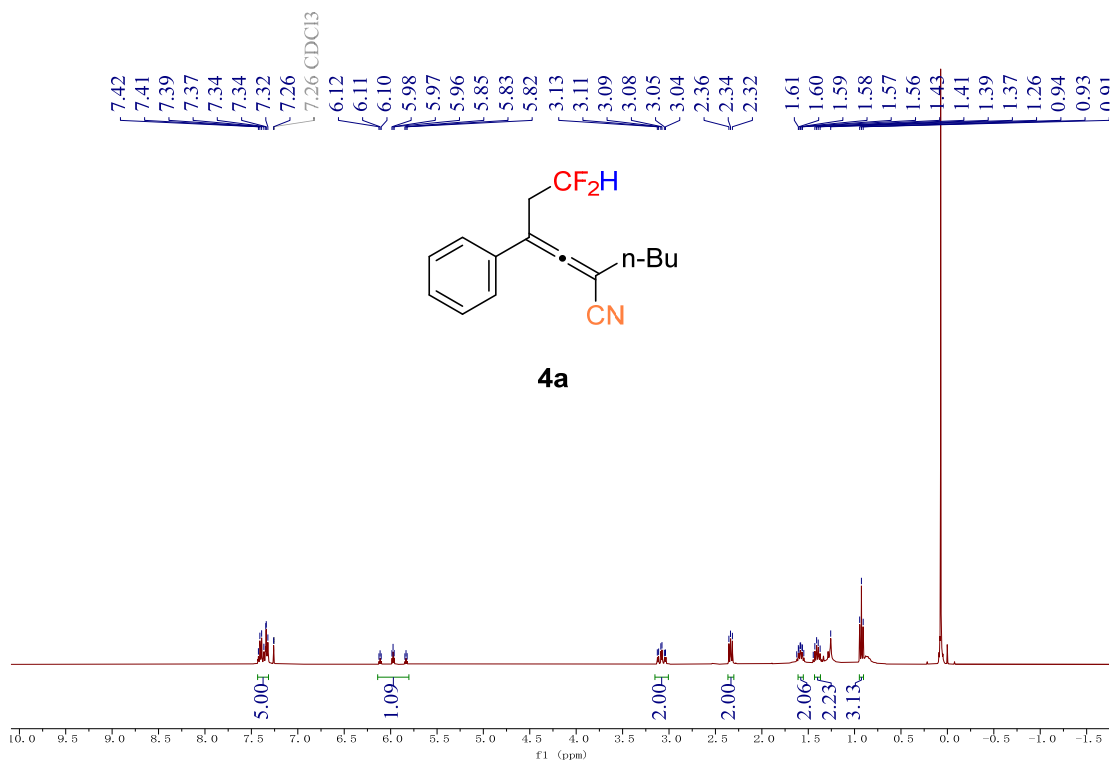

<sup>13</sup>C NMR (101 MHz, CDCl<sub>3</sub>)

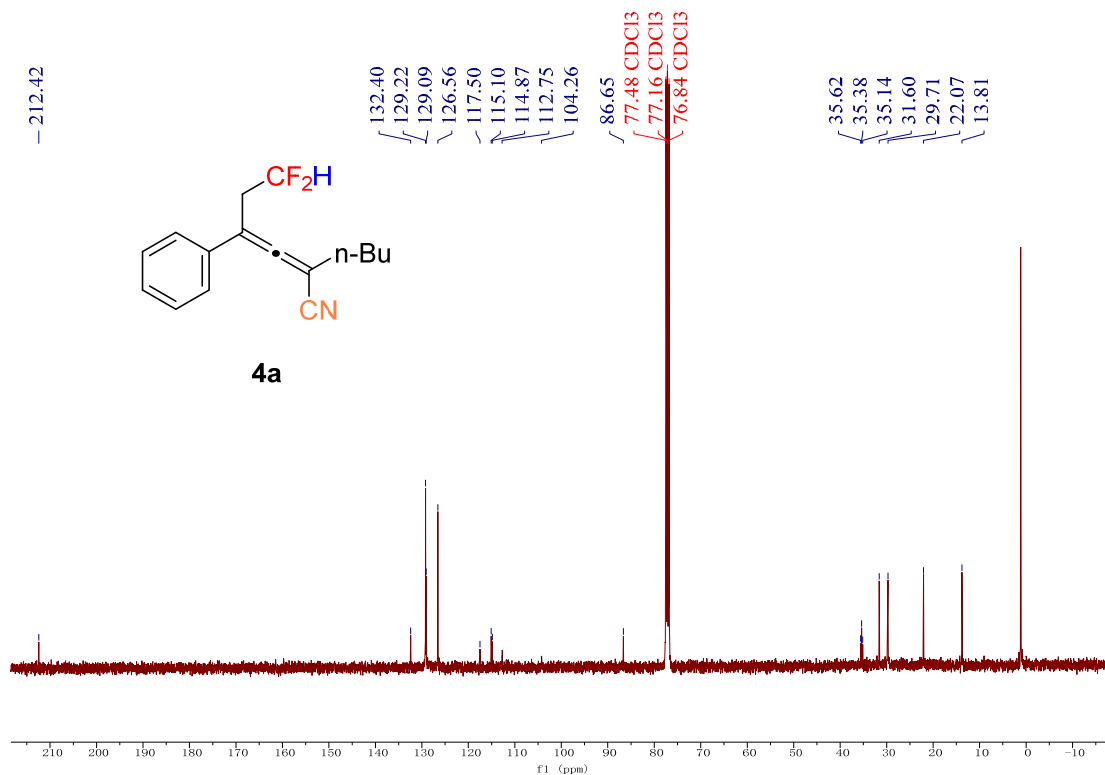

<sup>19</sup>F NMR (376 MHz, CDCl<sub>3</sub>)

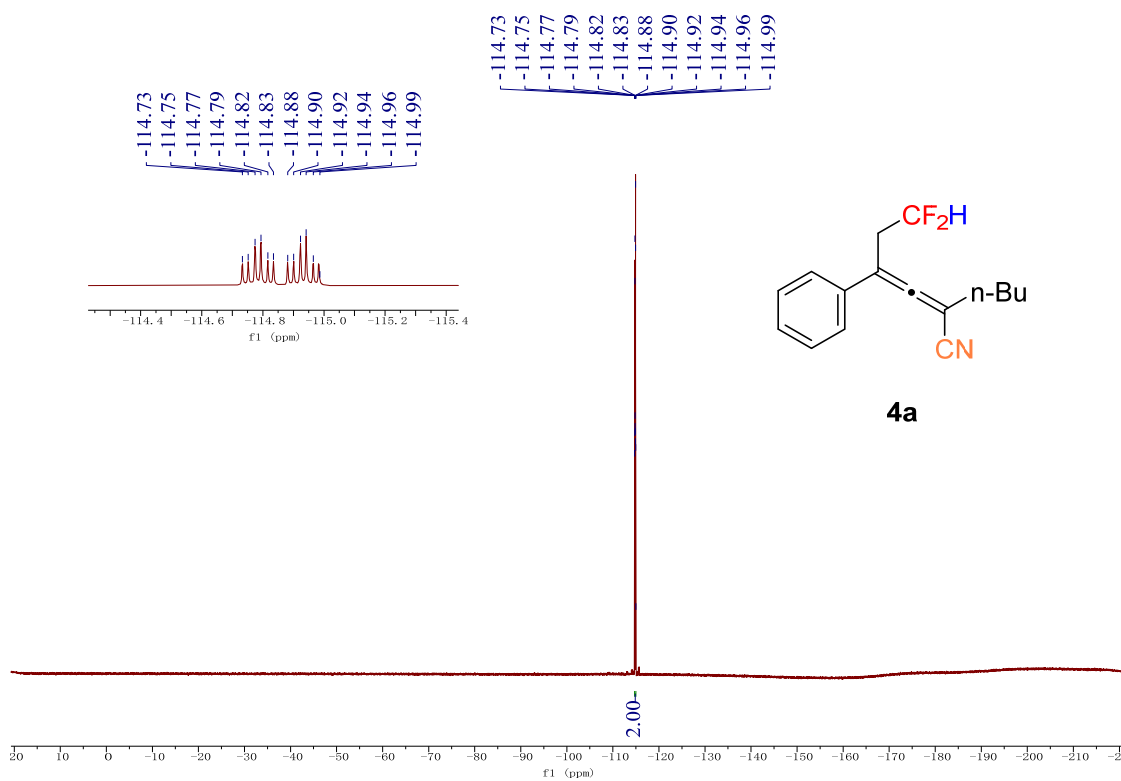

$^1\text{H}$  NMR (400 MHz,  $\text{CDCl}_3$ )

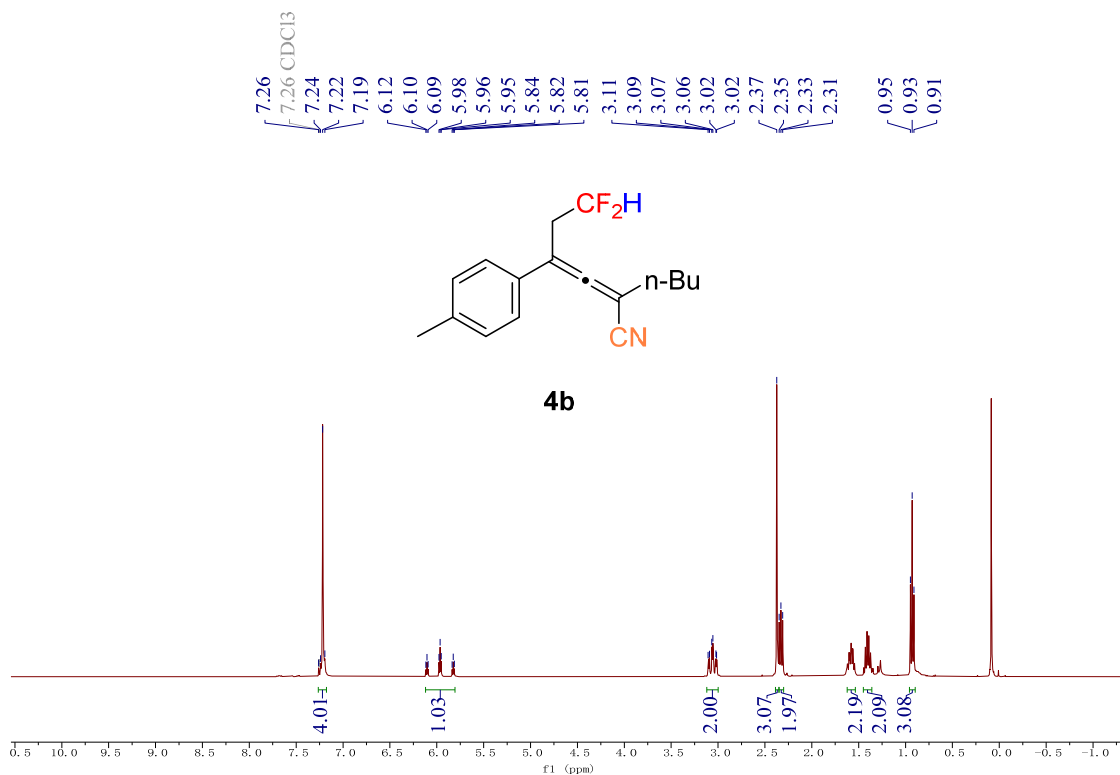

$^{13}\text{C}$  NMR (101 MHz,  $\text{CDCl}_3$ )

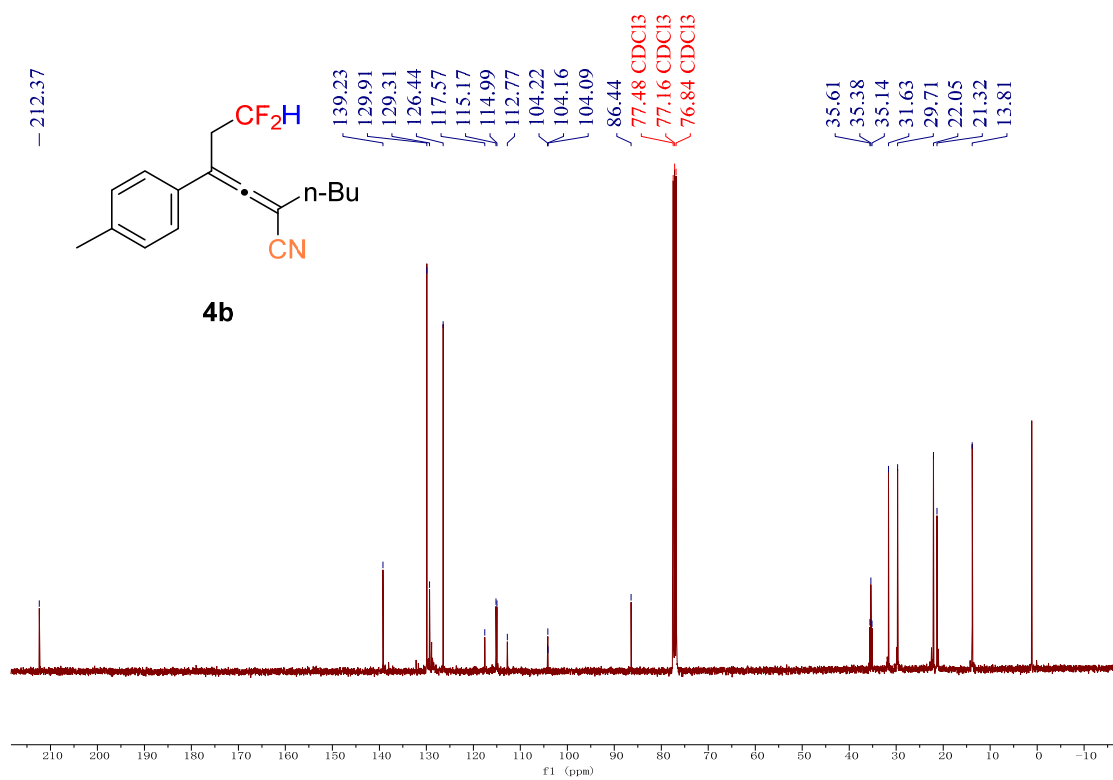

<sup>19</sup>F NMR (376 MHz, CDCl<sub>3</sub>)

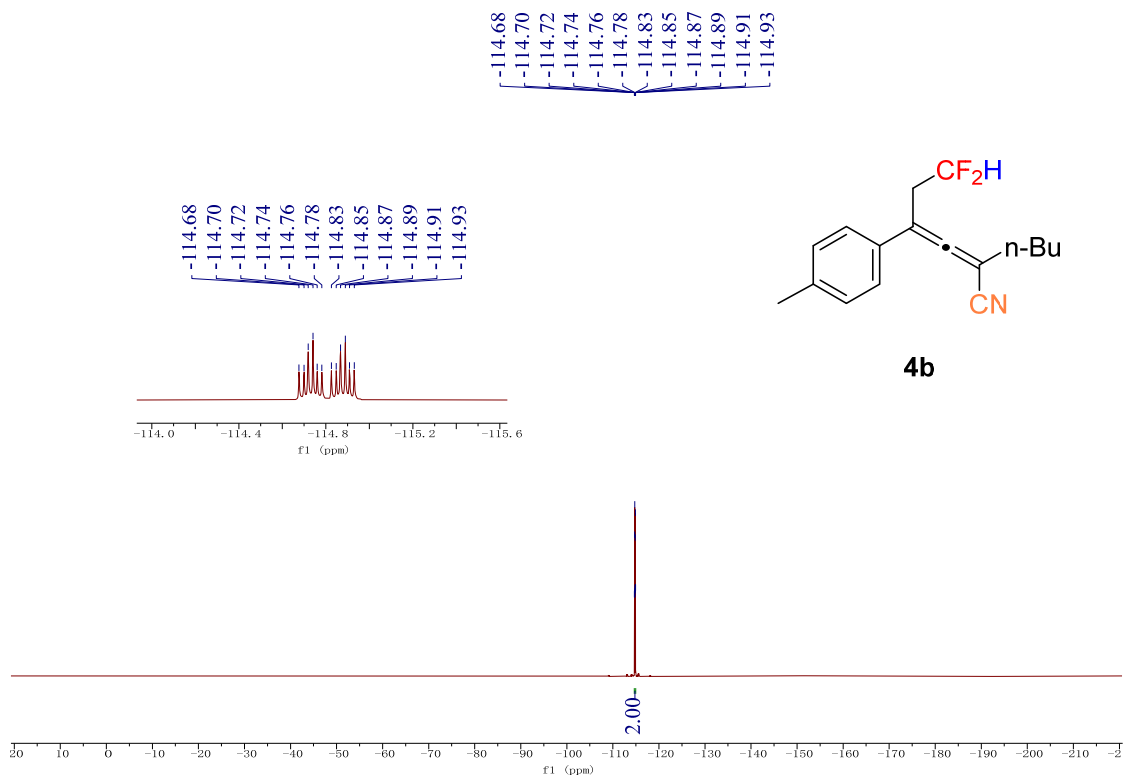

**<sup>1</sup>H NMR (400 MHz, CDCl<sub>3</sub>)**

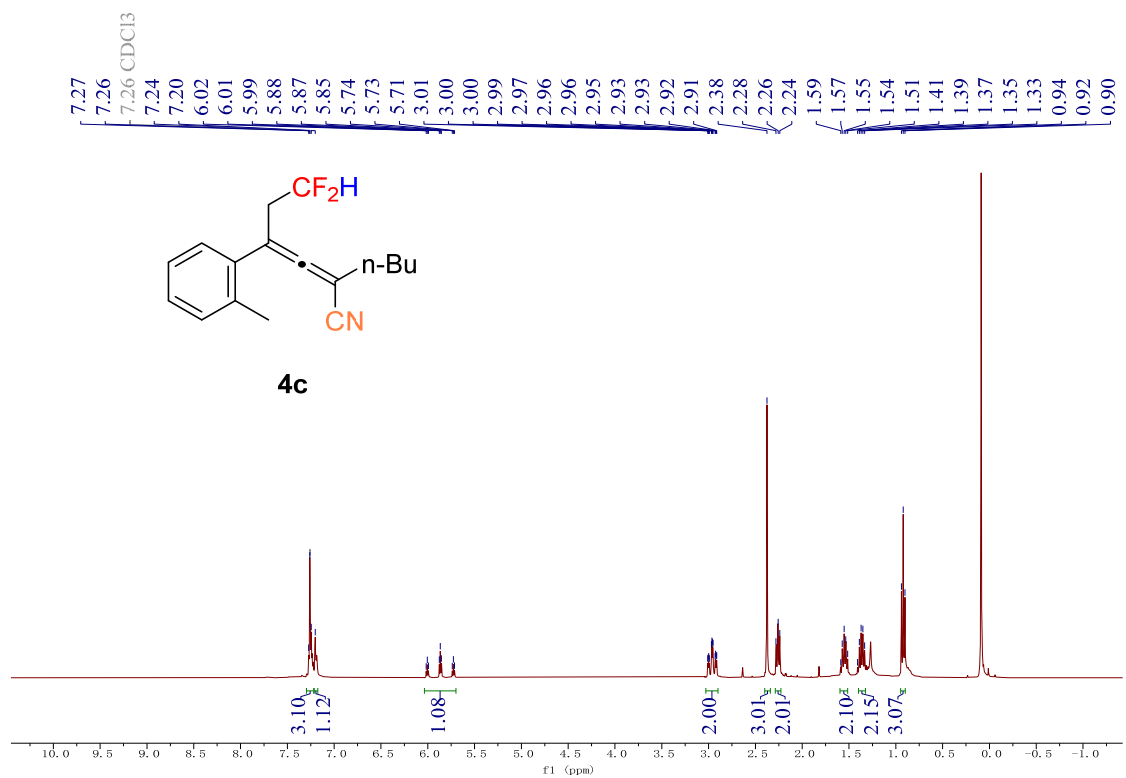

<sup>13</sup>C NMR (101 MHz, CDCl<sub>3</sub>)

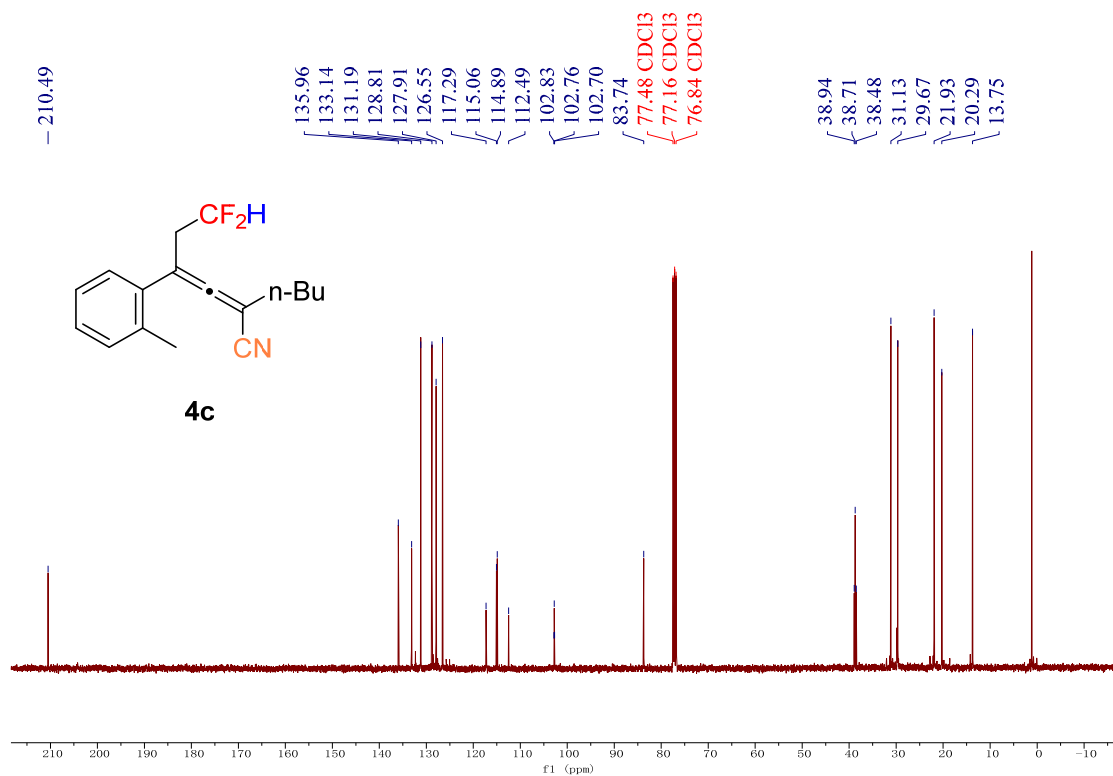

<sup>19</sup>F NMR (376 MHz, CDCl<sub>3</sub>)



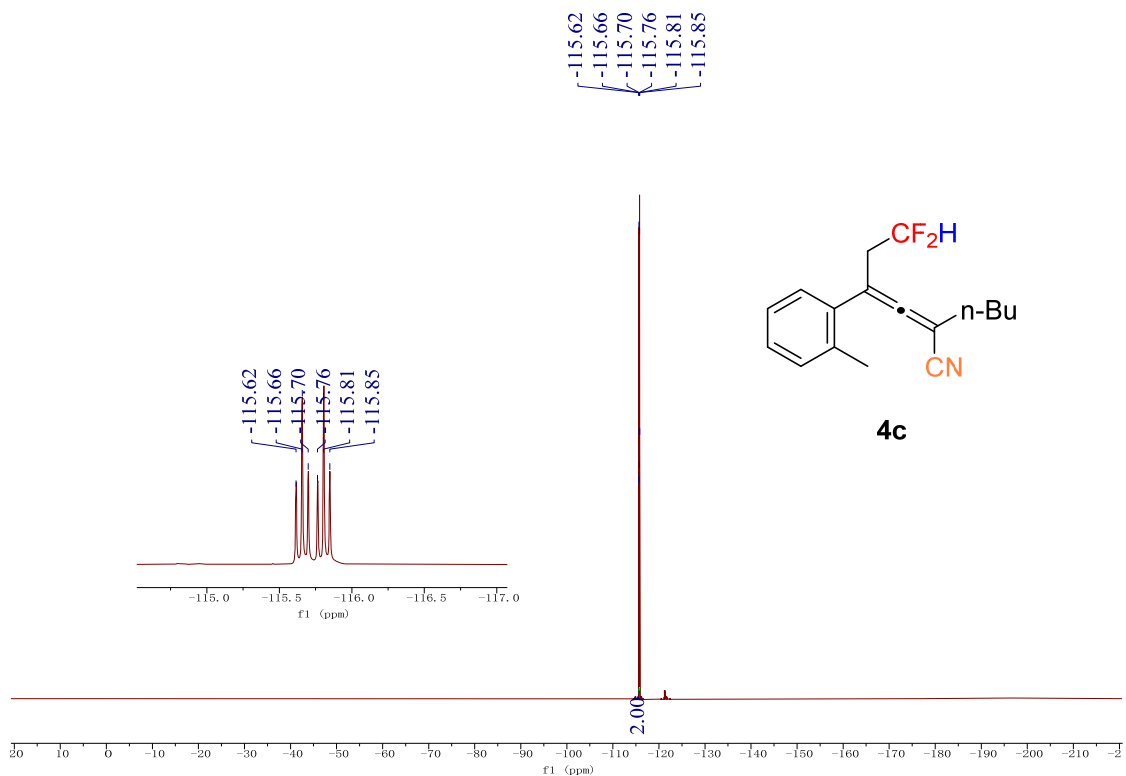

**<sup>1</sup>H NMR (400 MHz, CDCl<sub>3</sub>)**

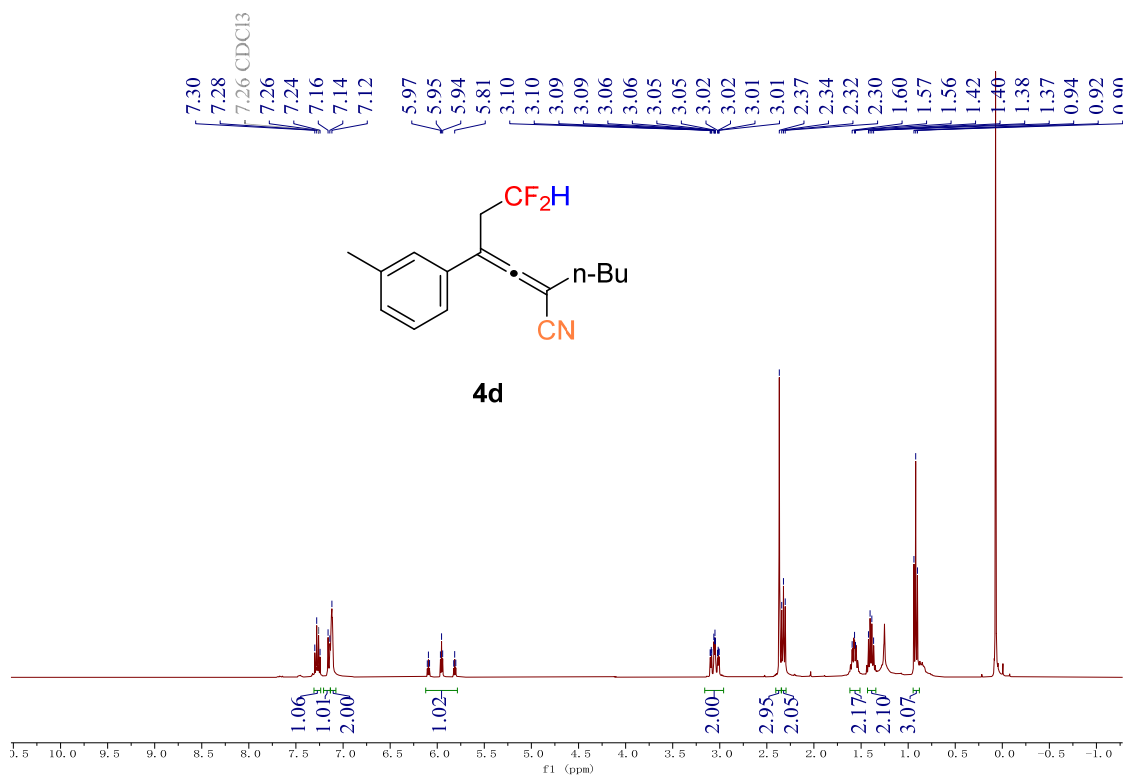

<sup>13</sup>C NMR (101 MHz, CDCl<sub>3</sub>)

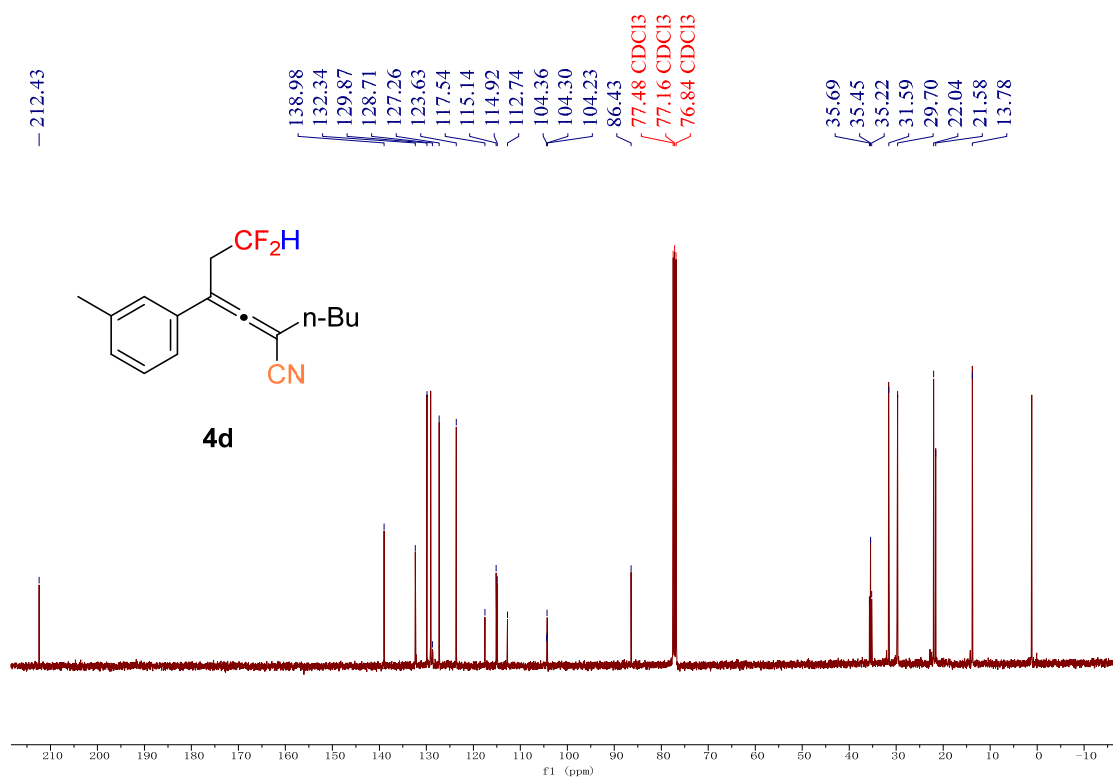

<sup>19</sup>F NMR (376 MHz, CDCl<sub>3</sub>)

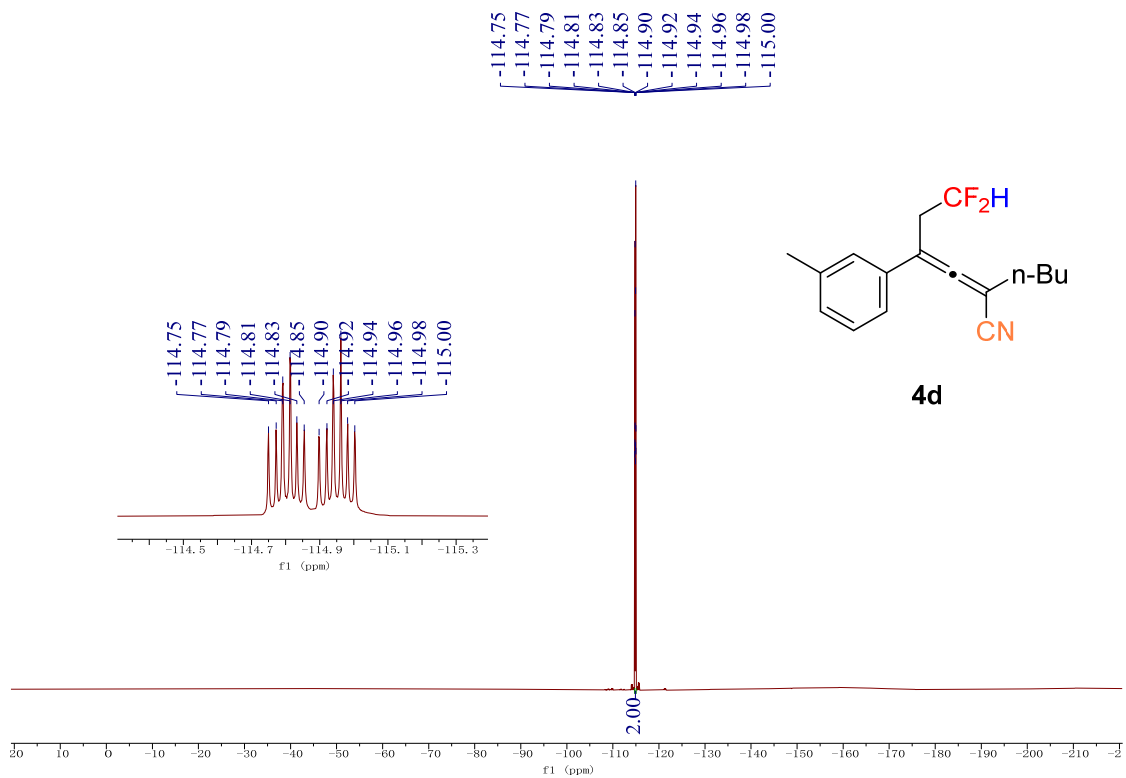

**<sup>1</sup>H NMR (400 MHz, CDCl<sub>3</sub>)**

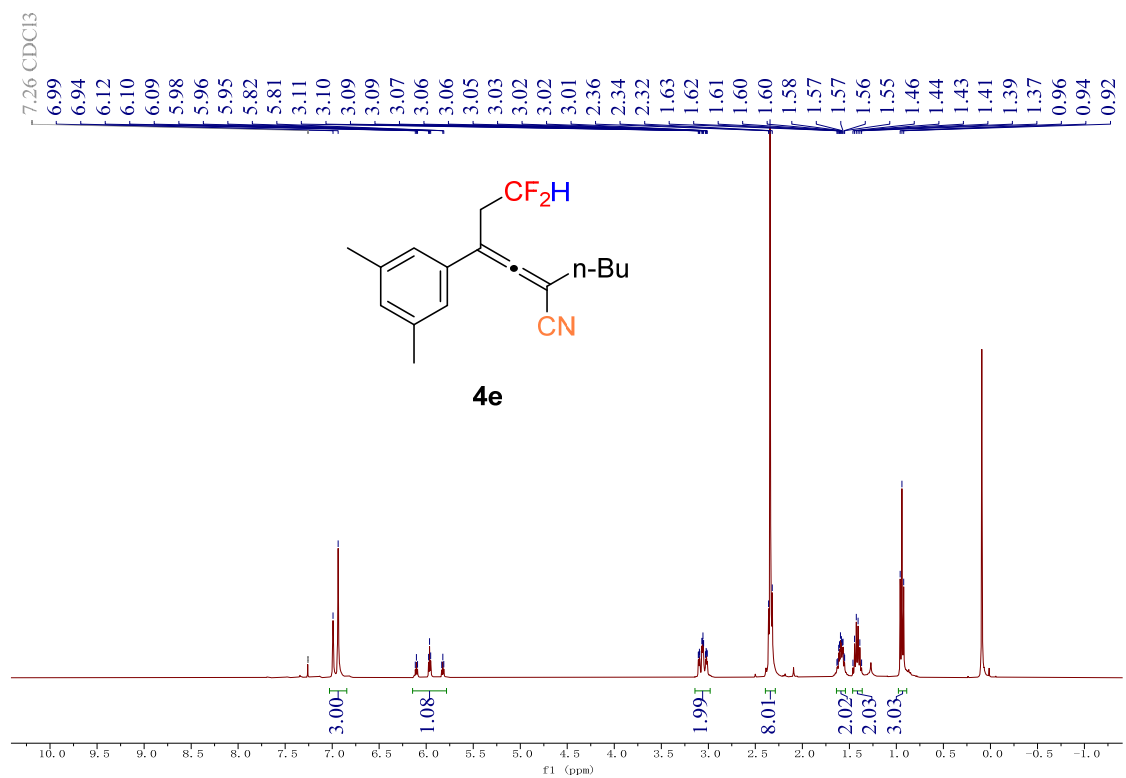

<sup>13</sup>C NMR (101 MHz, CDCl<sub>3</sub>)

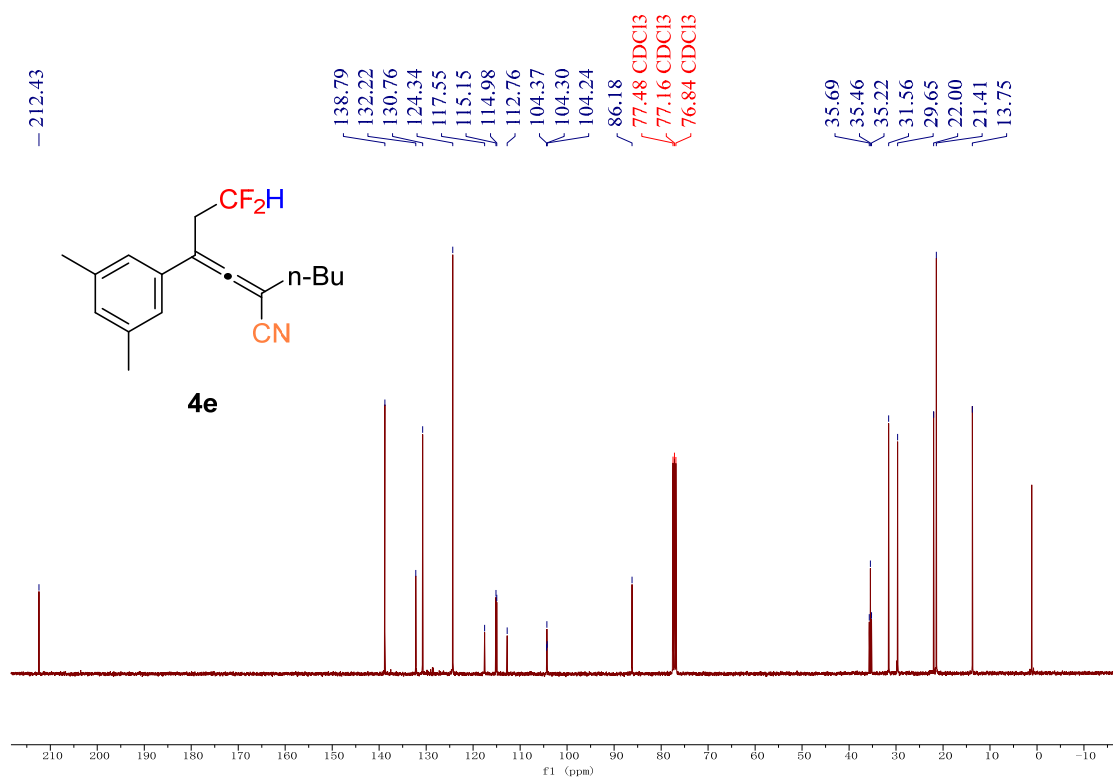

<sup>19</sup>F NMR (376 MHz, CDCl<sub>3</sub>)

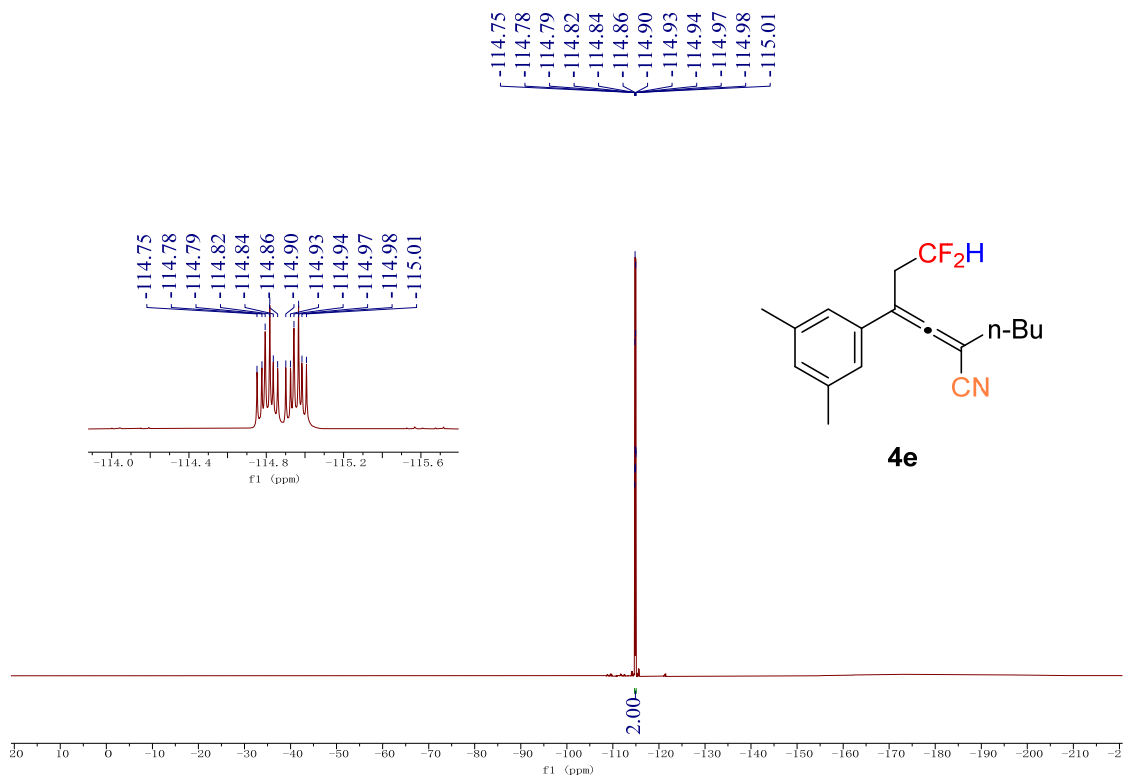

**<sup>1</sup>H NMR (400 MHz, CDCl<sub>3</sub>)**

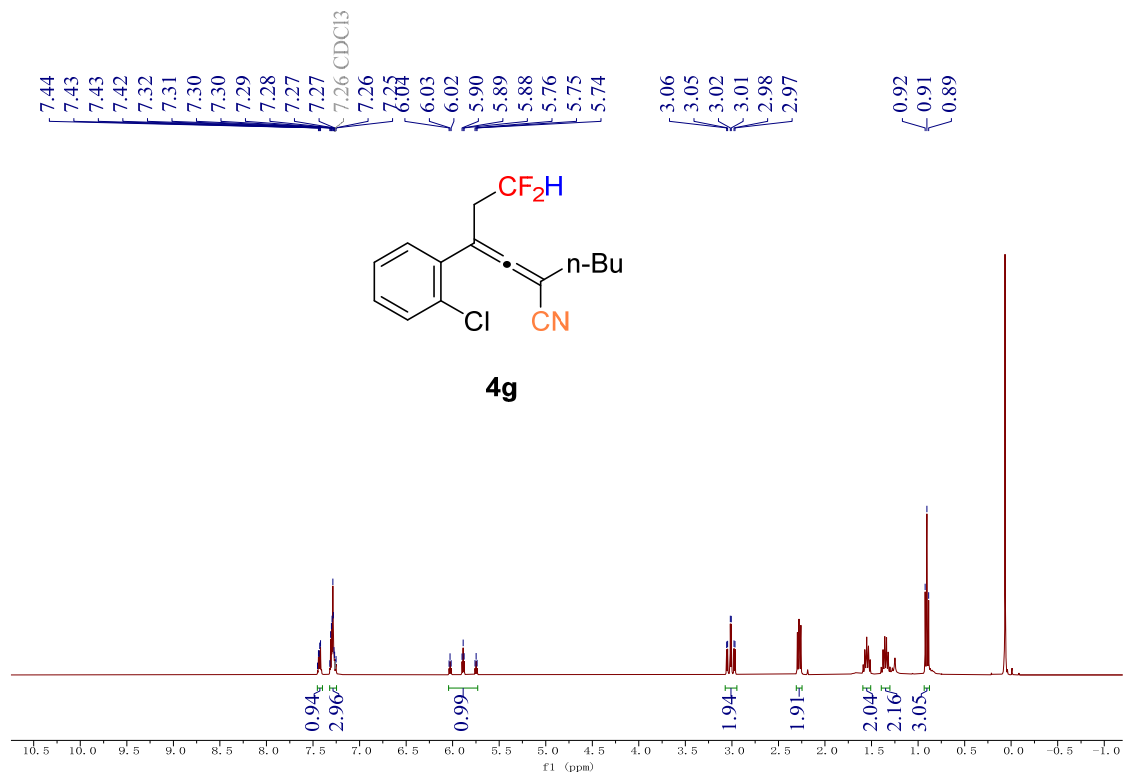

**<sup>13</sup>C NMR (101 MHz, CDCl<sub>3</sub>)**

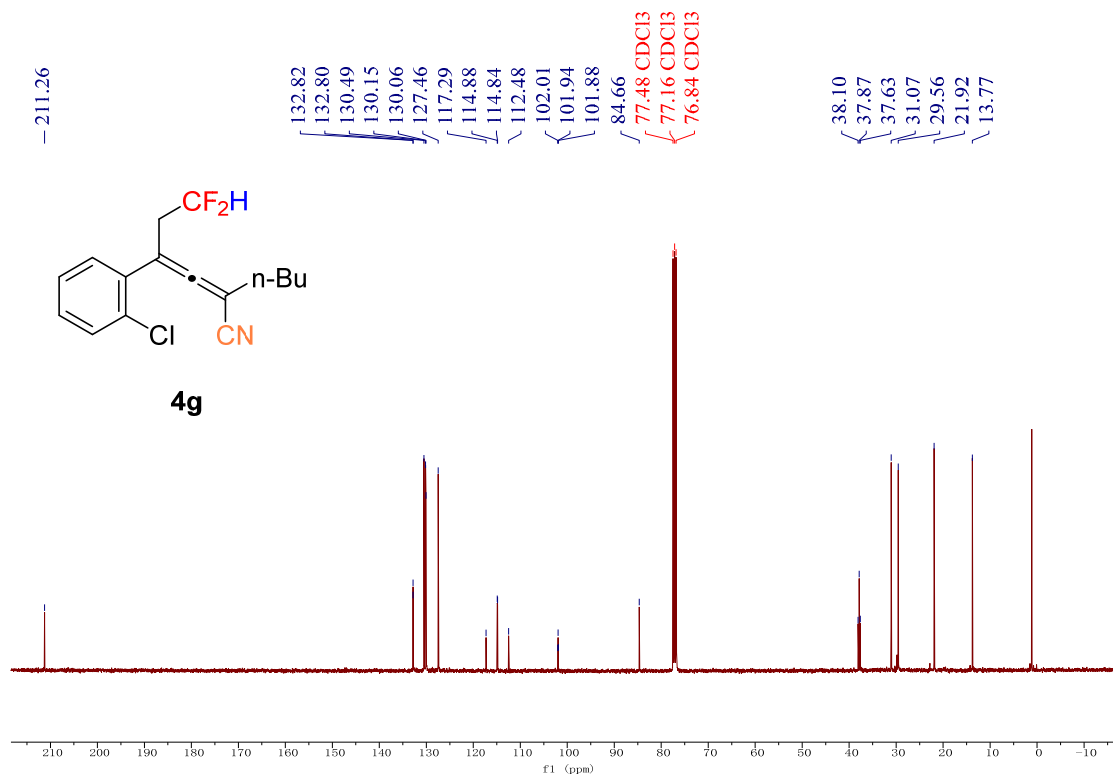

**<sup>19</sup>F NMR (376 MHz, CDCl<sub>3</sub>)**

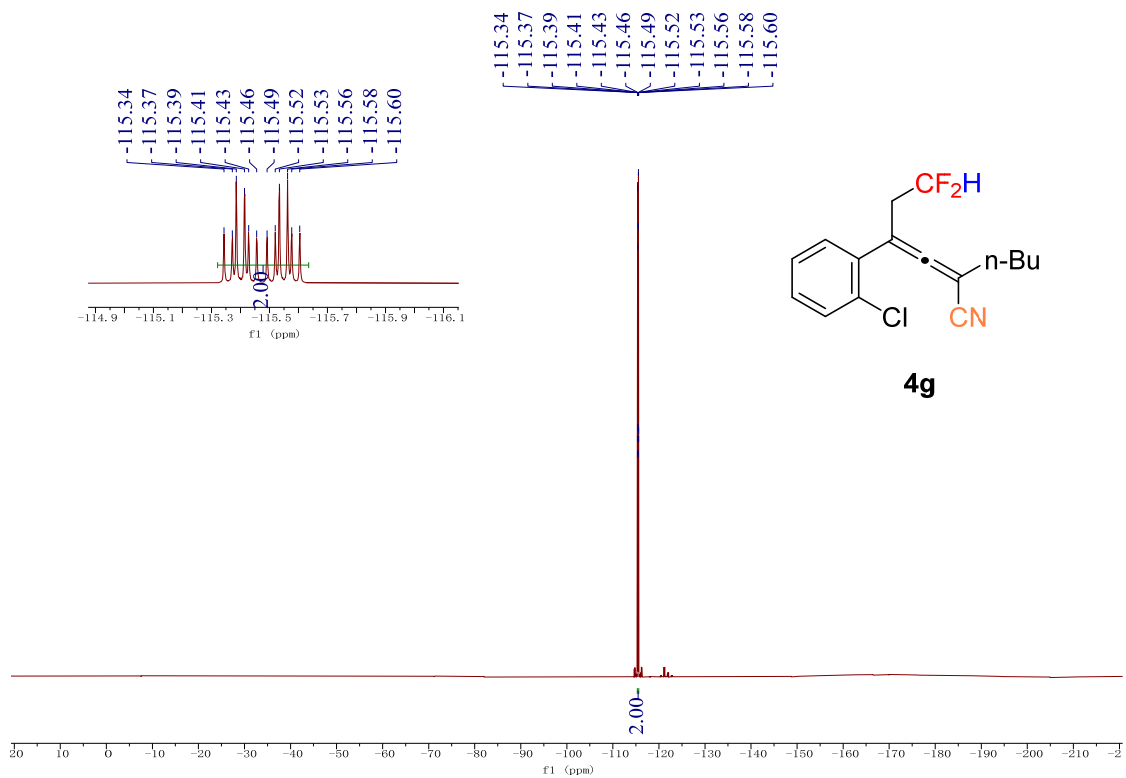

**<sup>1</sup>H NMR (400 MHz, CDCl<sub>3</sub>)**

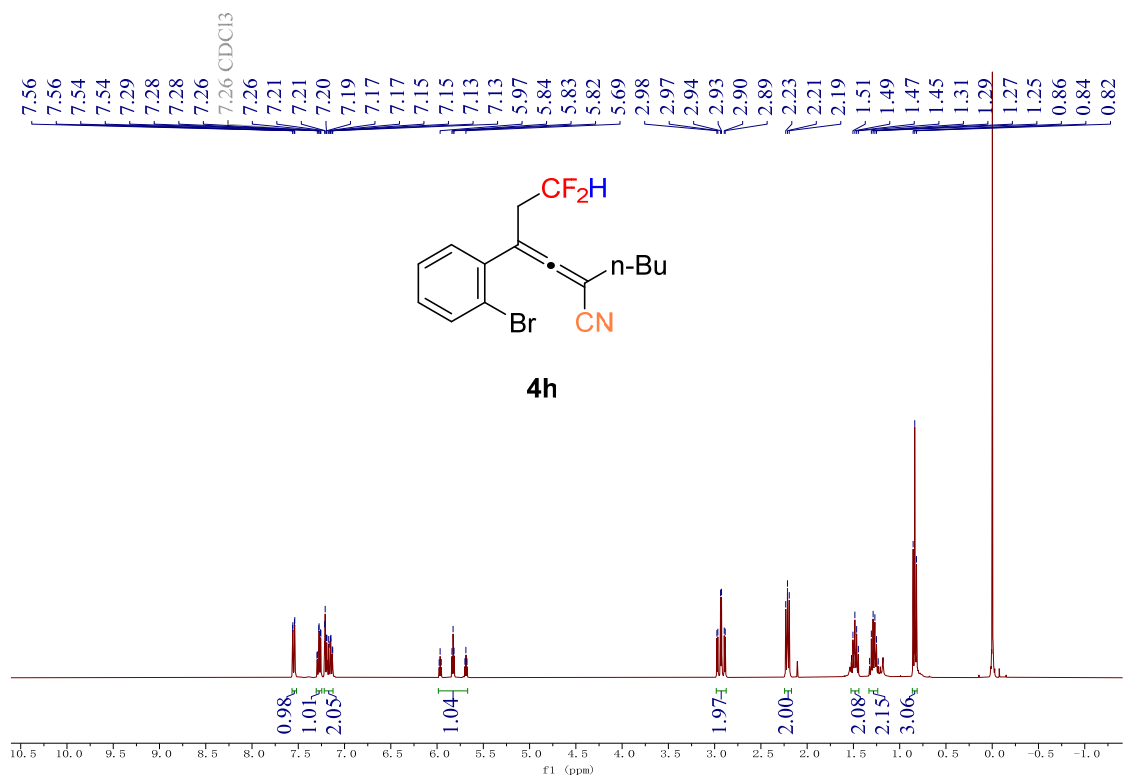

**$^{13}\text{C}$  NMR (101 MHz,  $\text{CDCl}_3$ )**

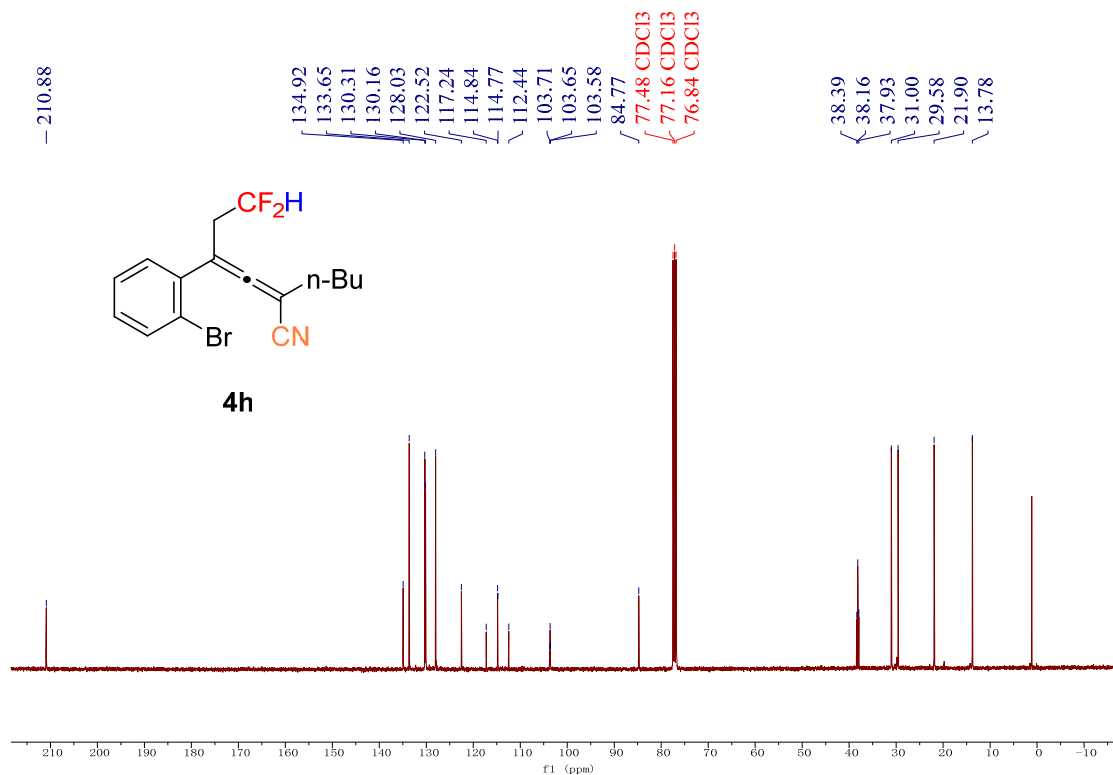

**$^{19}\text{F}$  NMR (376 MHz,  $\text{CDCl}_3$ )**





<sup>13</sup>C NMR (101 MHz, CDCl<sub>3</sub>)

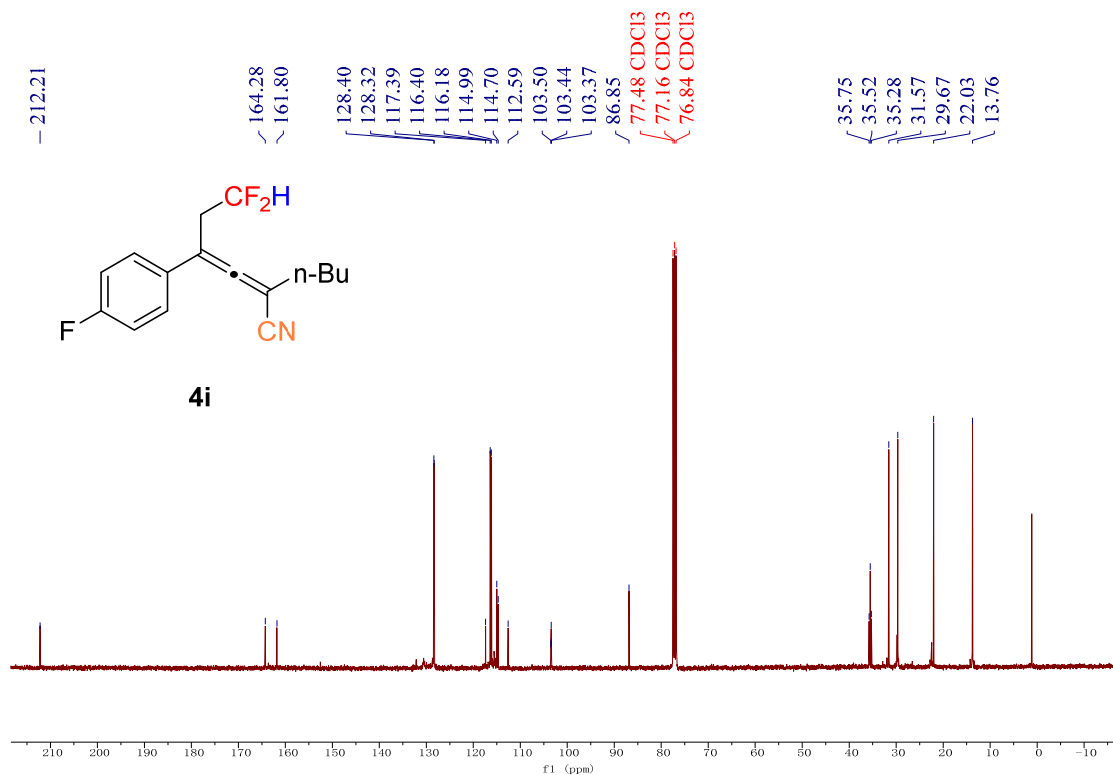

<sup>19</sup>F NMR (376 MHz, CDCl<sub>3</sub>)

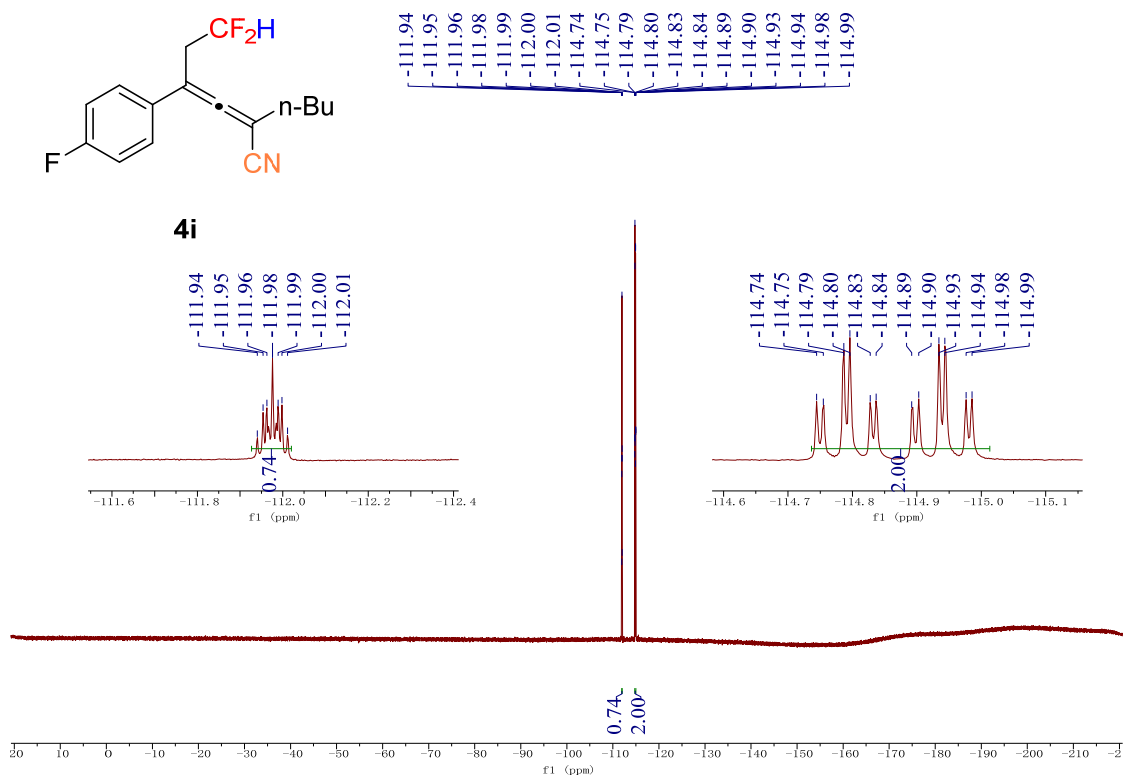

$^1\text{H}$  NMR (400 MHz,  $\text{CDCl}_3$ )

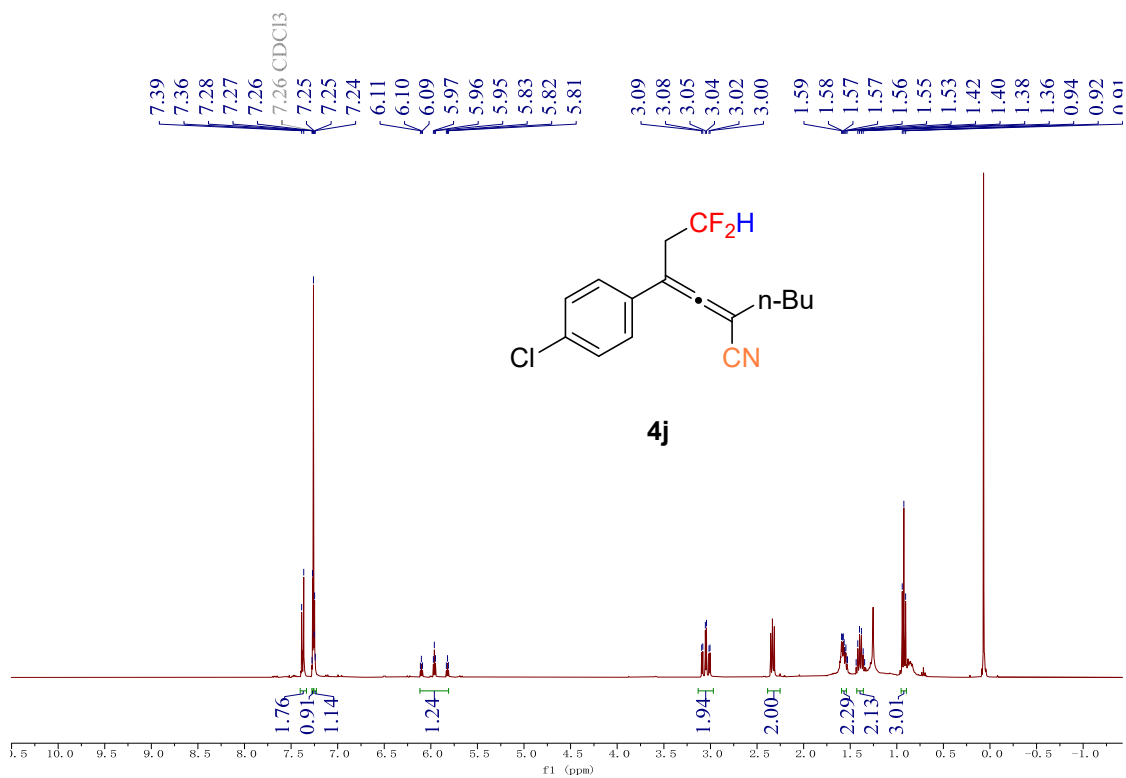

$^{13}\text{C}$  NMR (101 MHz,  $\text{CDCl}_3$ )

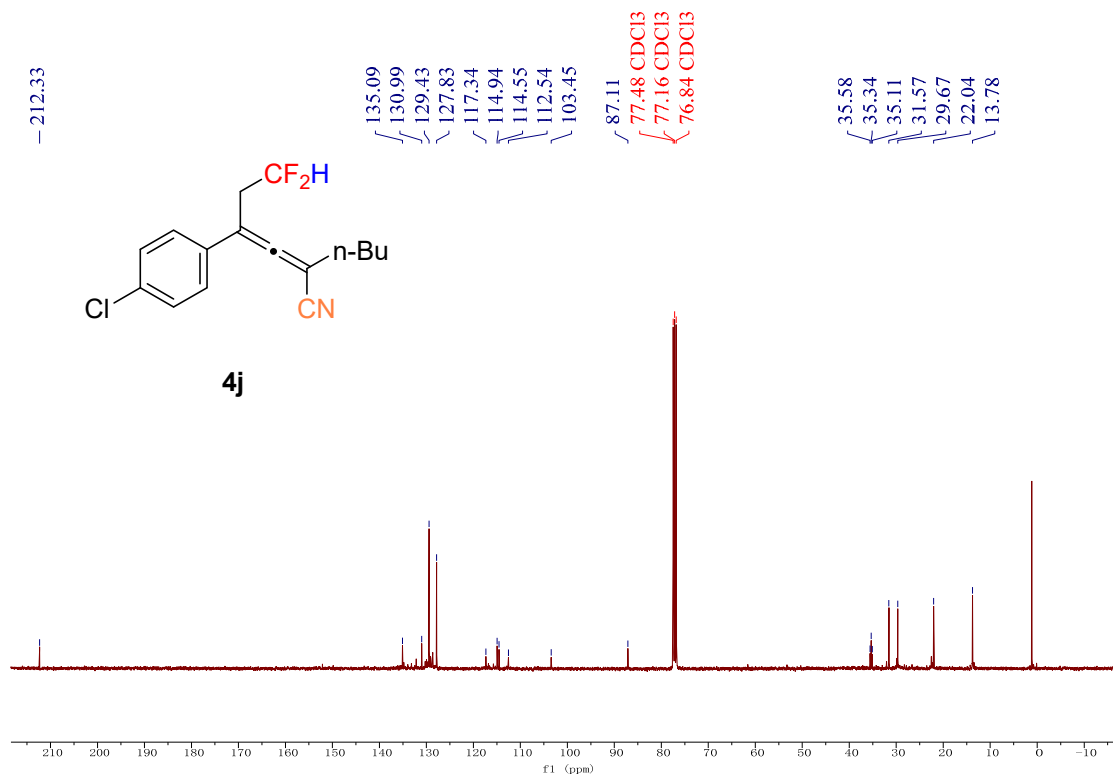

$^{19}\text{F}$  NMR (376 MHz,  $\text{CDCl}_3$ )

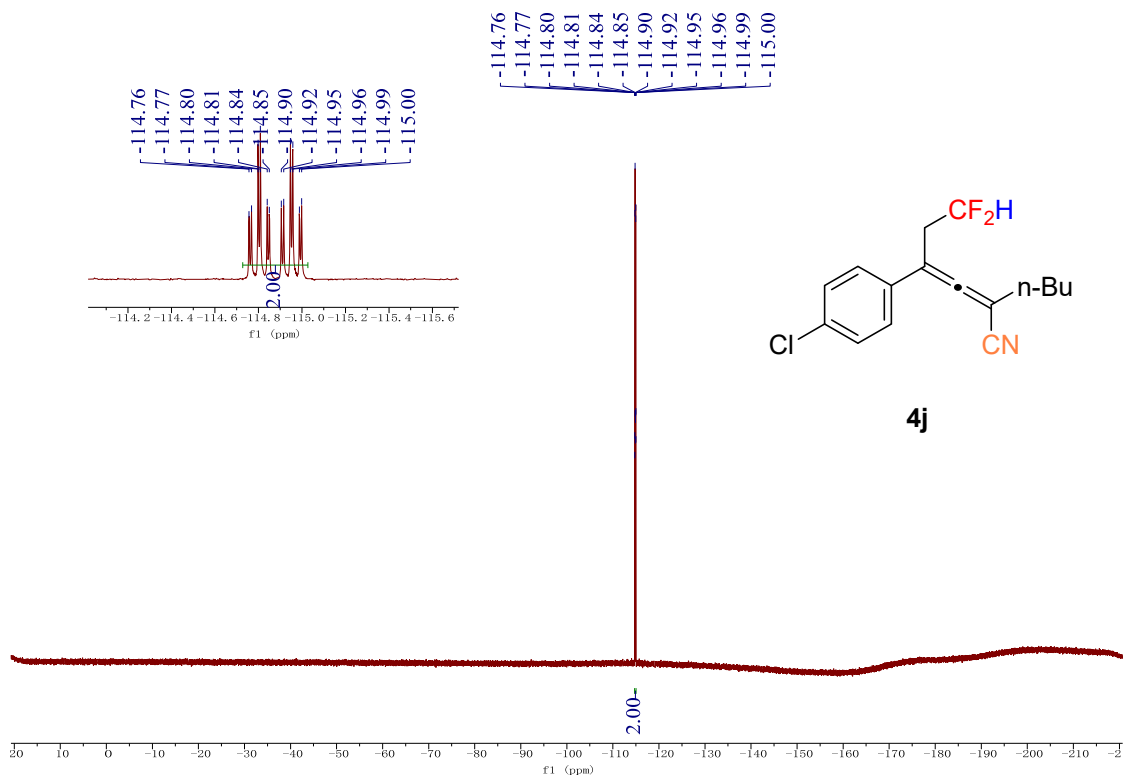

**<sup>1</sup>H NMR (400 MHz, CDCl<sub>3</sub>)**

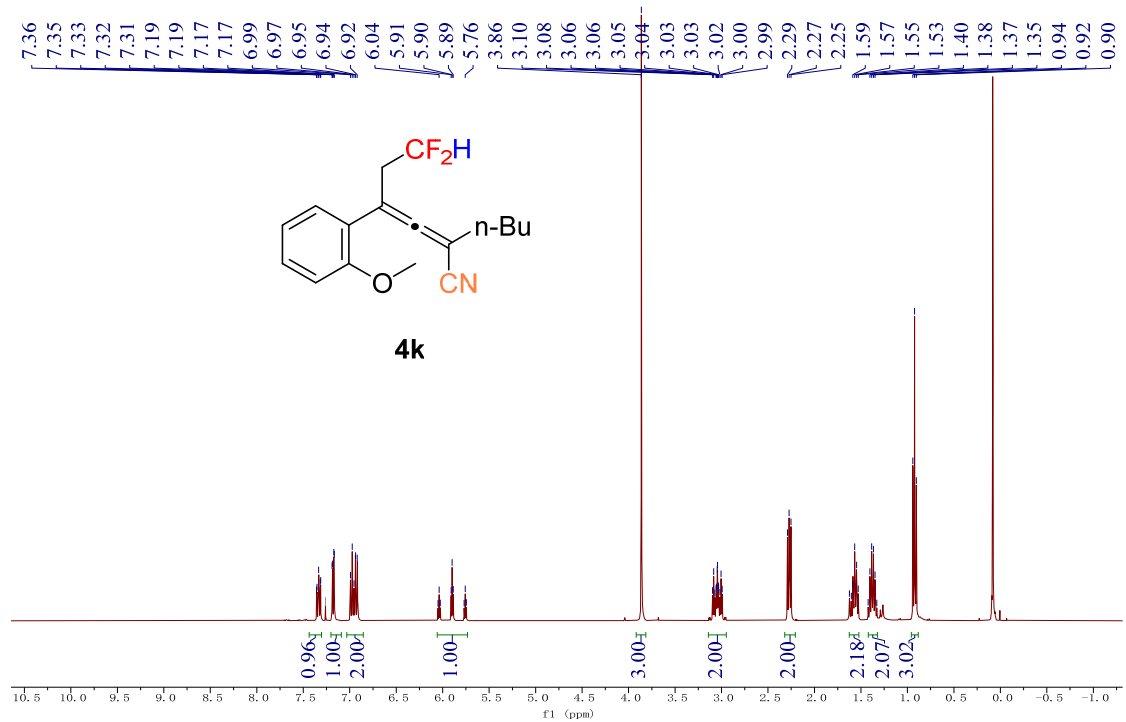

<sup>13</sup>C NMR (101 MHz, CDCl<sub>3</sub>)

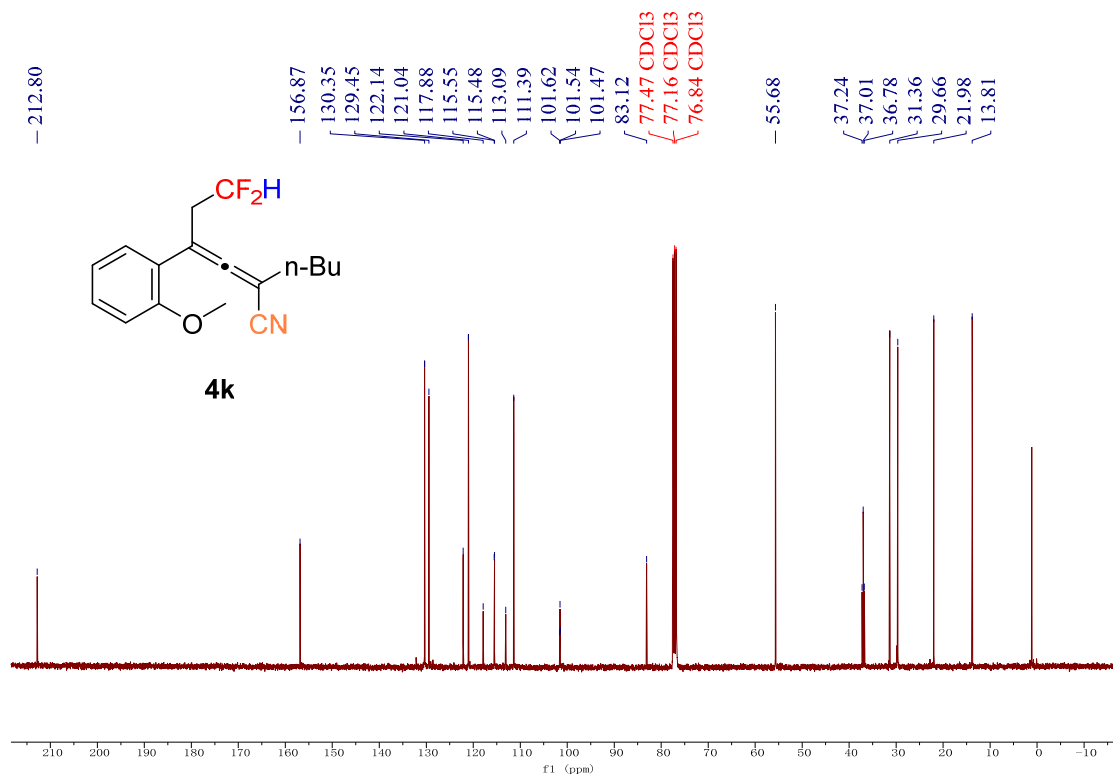

<sup>19</sup>F NMR (376 MHz, CDCl<sub>3</sub>)

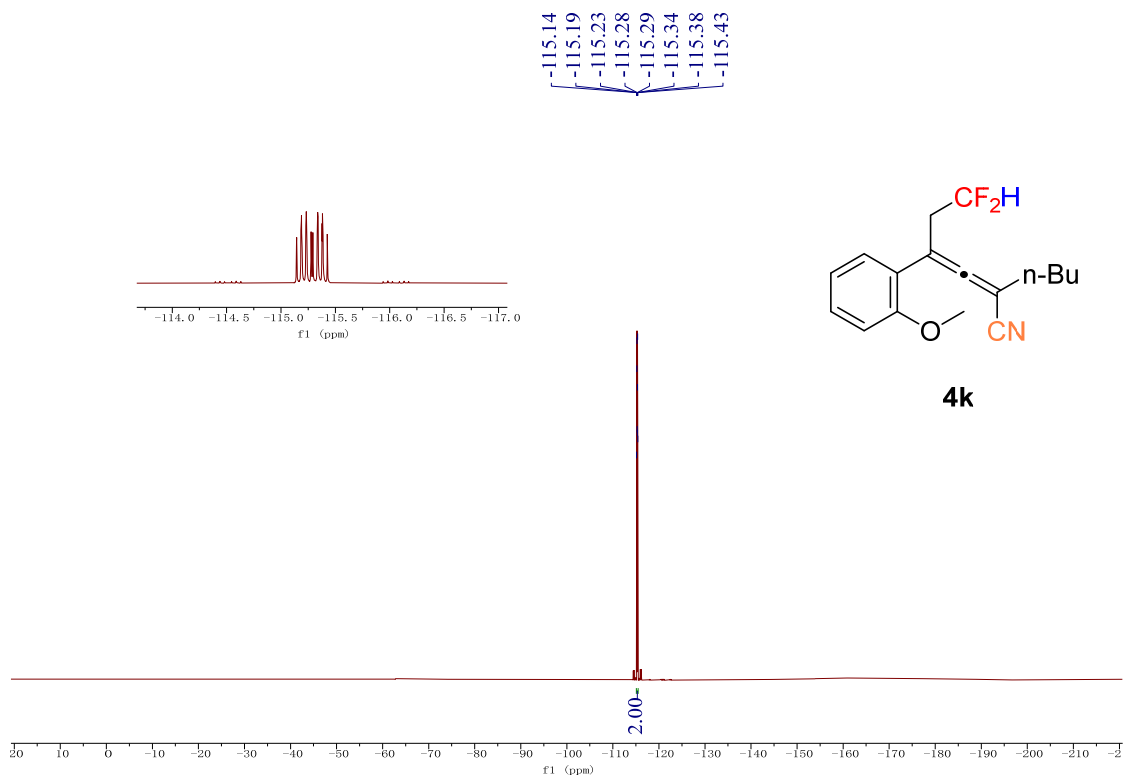

**<sup>1</sup>H NMR (400 MHz, CDCl<sub>3</sub>)**

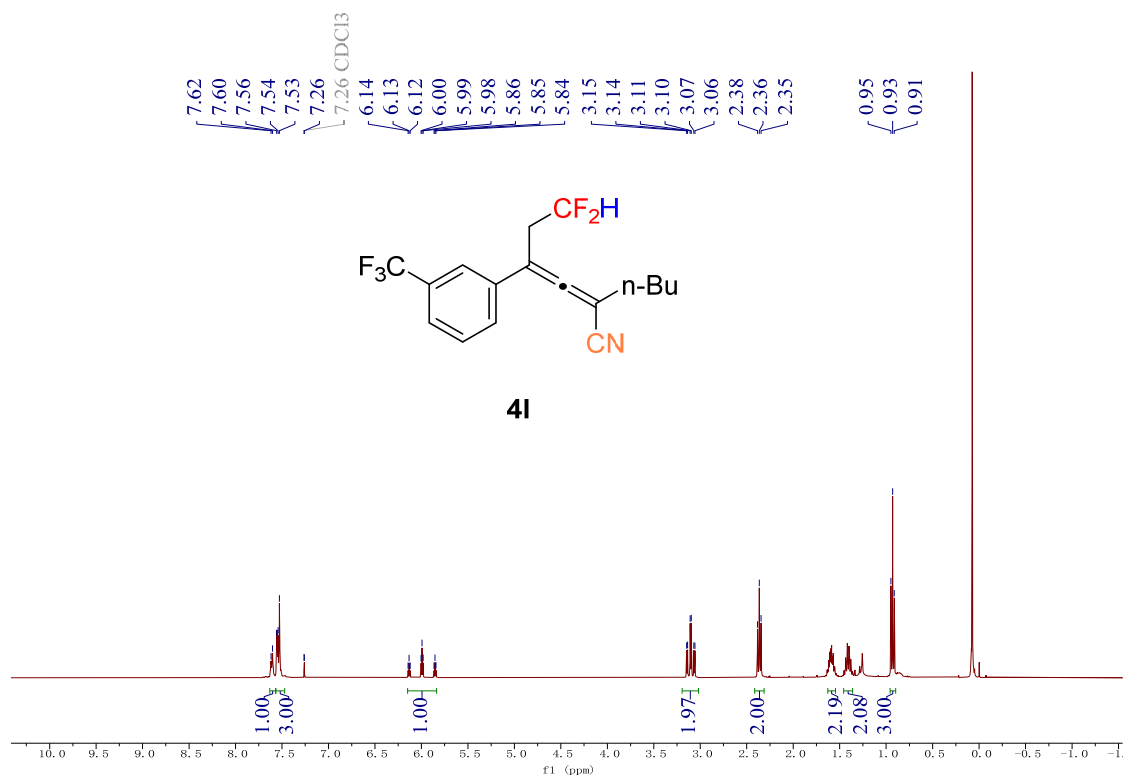

<sup>13</sup>C NMR (101 MHz, CDCl<sub>3</sub>)

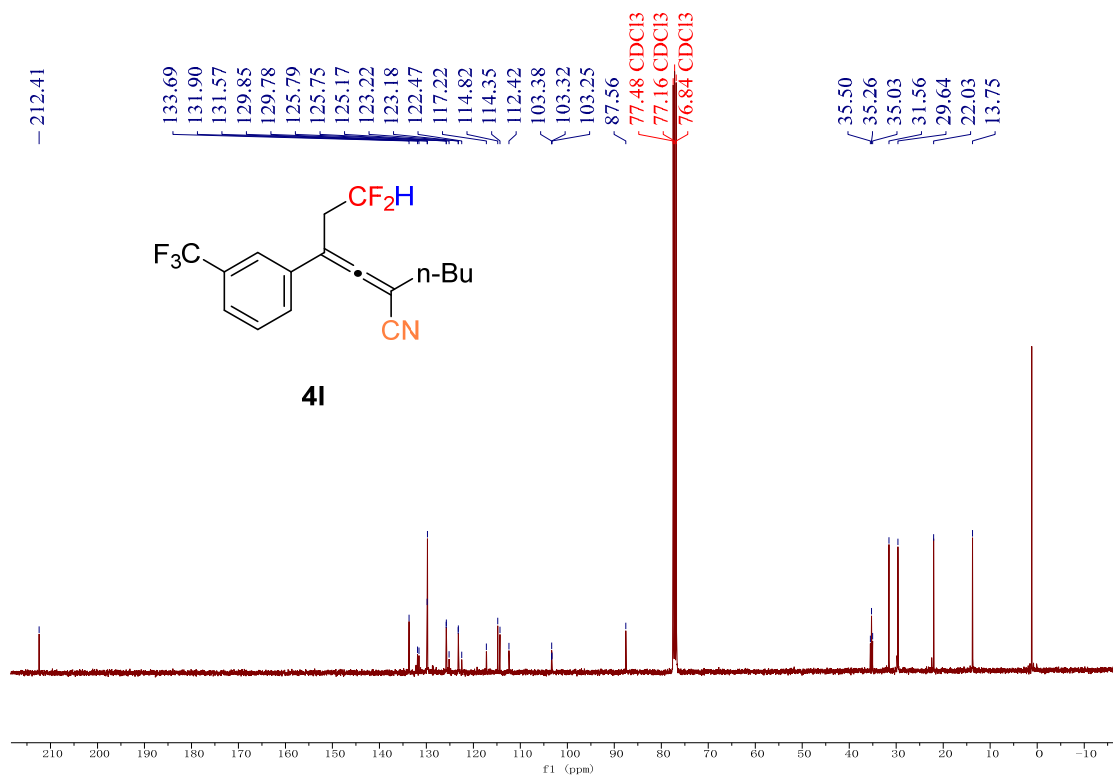

<sup>19</sup>F NMR (377 MHz, CDCl<sub>3</sub>)

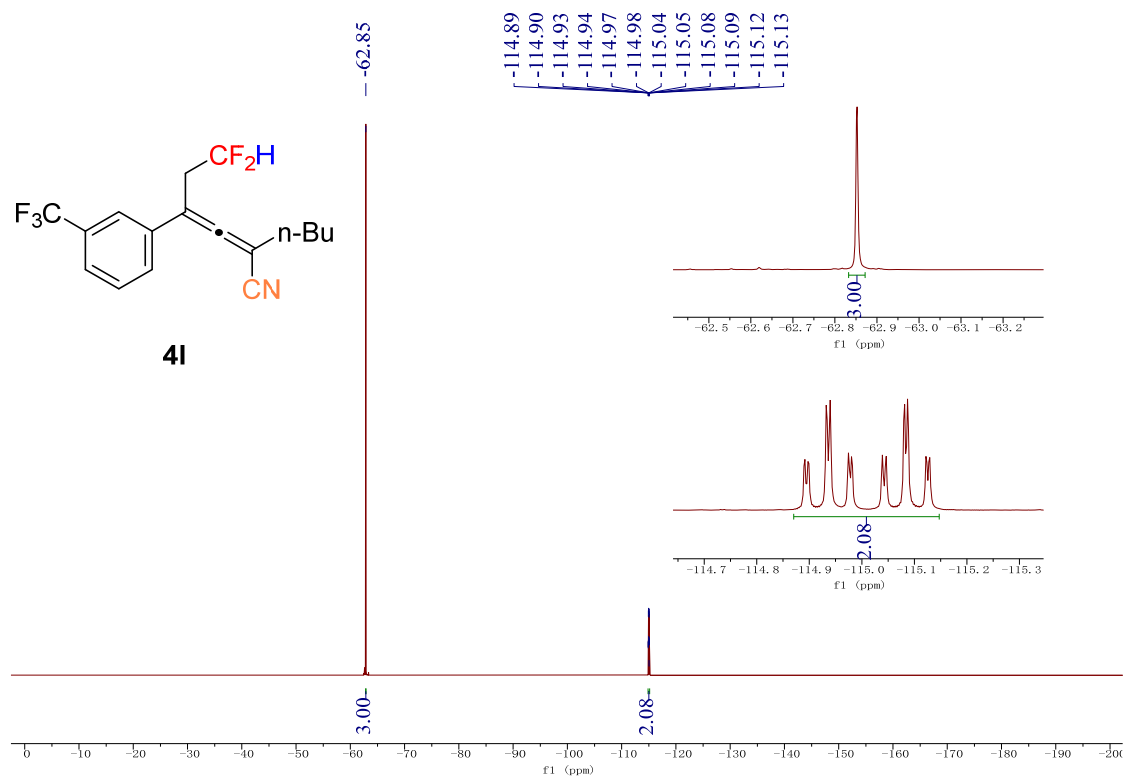



<sup>1</sup>H NMR (400 MHz, CDCl<sub>3</sub>)

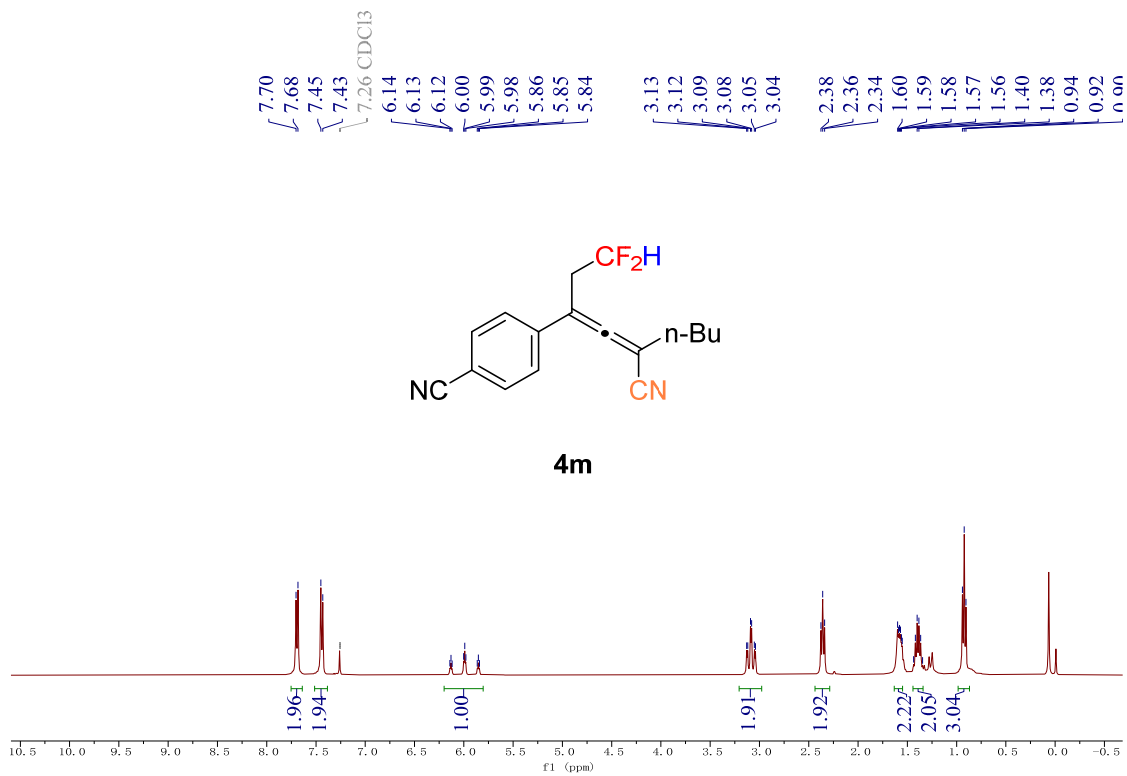

<sup>13</sup>C NMR (101 MHz, CDCl<sub>3</sub>)

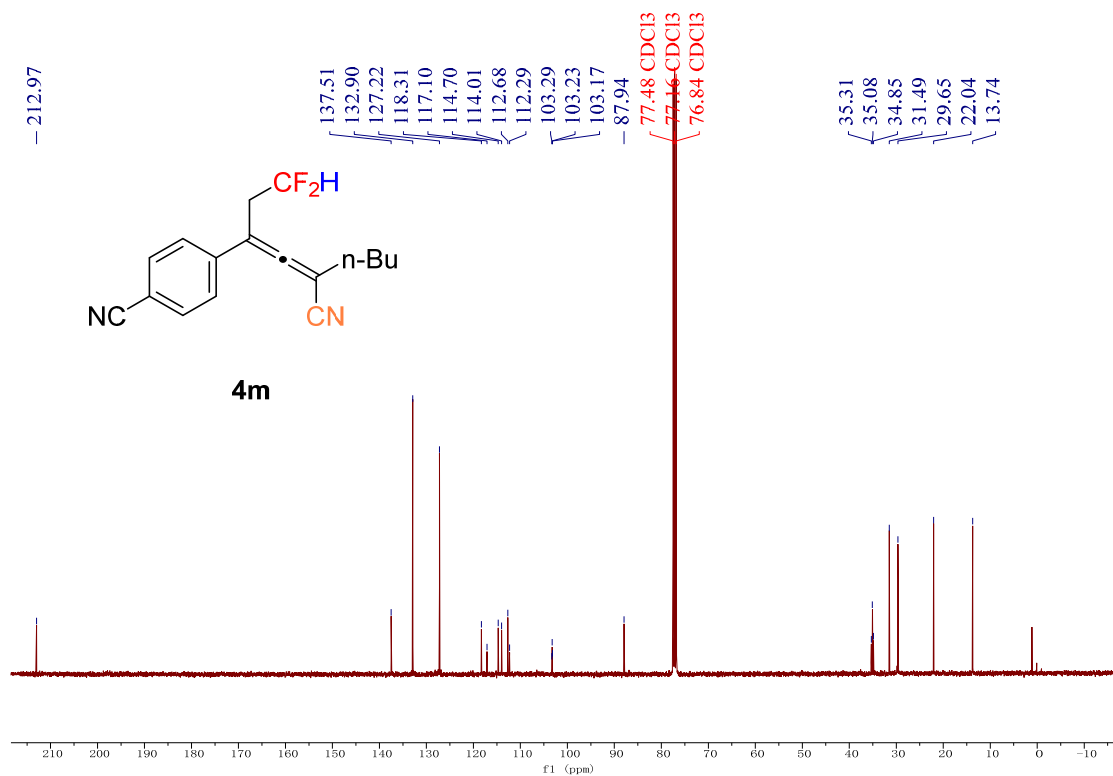

<sup>19</sup>F NMR (376 MHz, CDCl<sub>3</sub>)

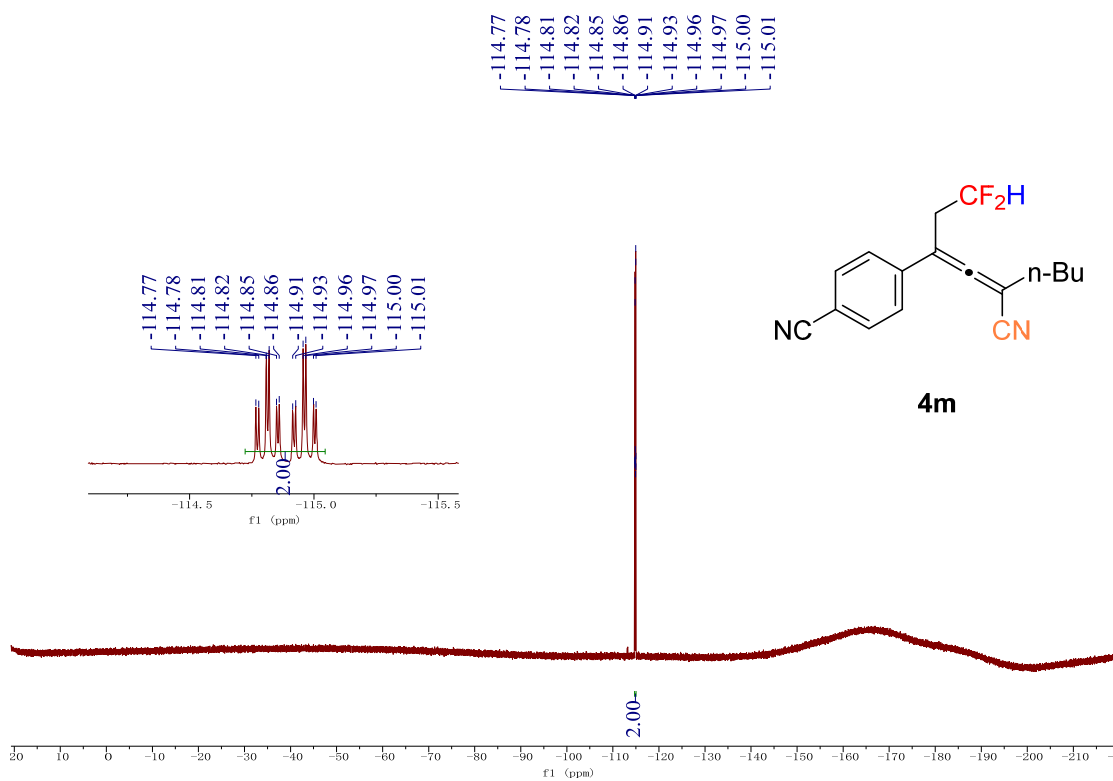

<sup>1</sup>H NMR (400 MHz, CDCl<sub>3</sub>)

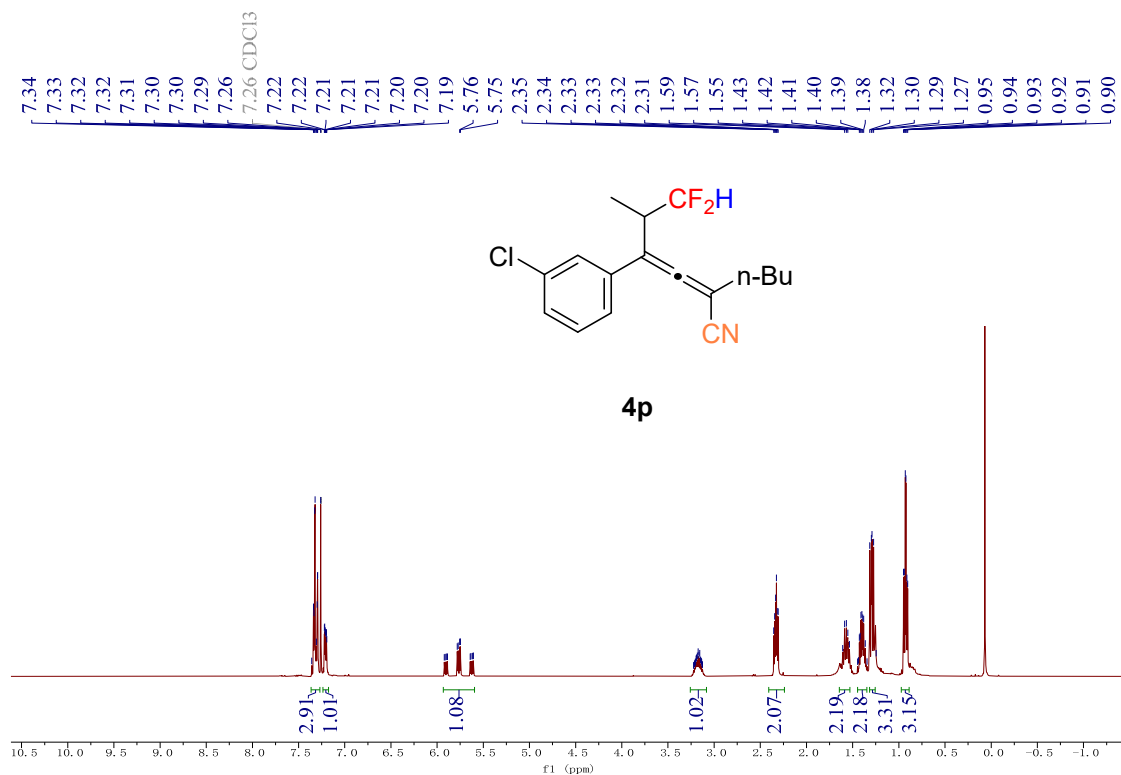

<sup>13</sup>C NMR (101 MHz, CDCl<sub>3</sub>)

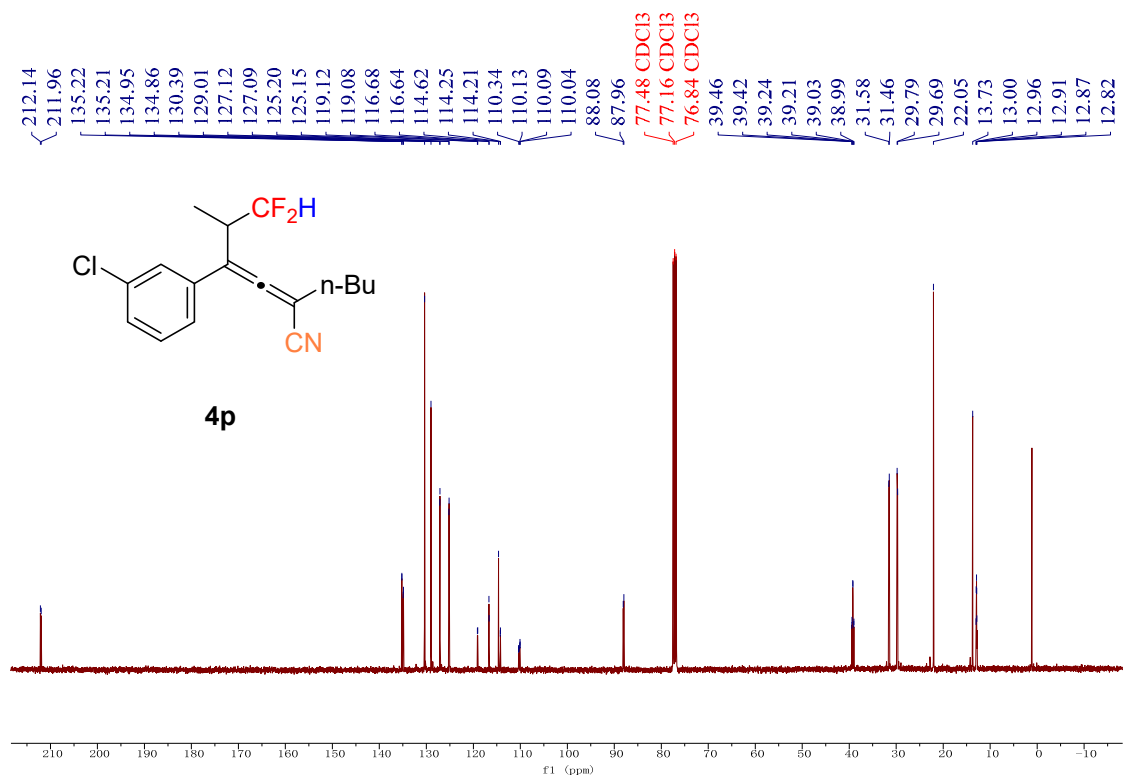

**<sup>19</sup>F NMR (376 MHz, CDCl<sub>3</sub>)**

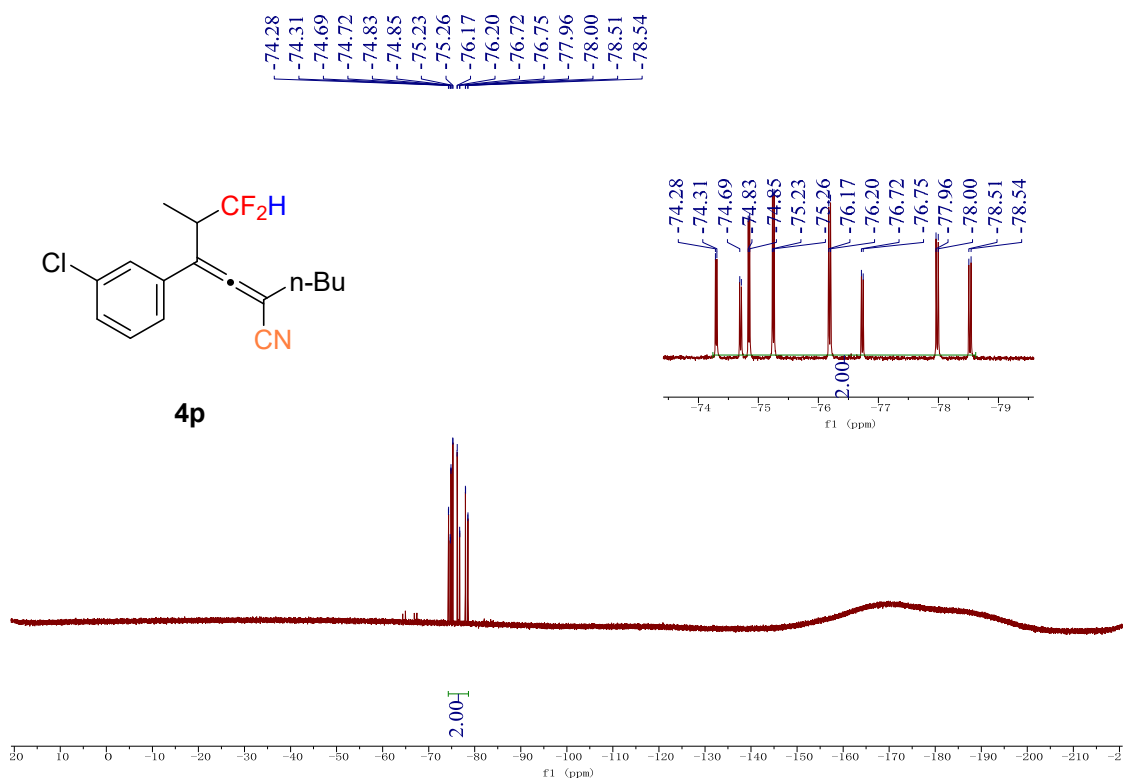

**<sup>1</sup>H NMR (400 MHz, CDCl<sub>3</sub>)**

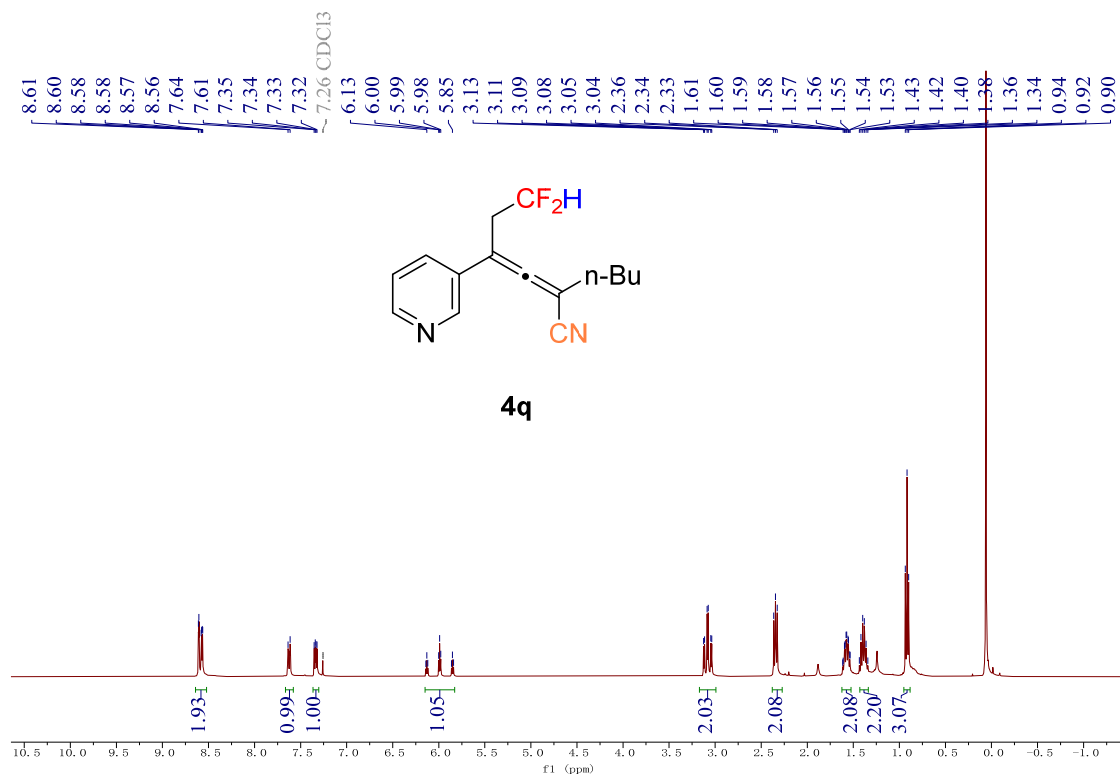

**<sup>13</sup>C NMR (101 MHz, CDCl<sub>3</sub>)**

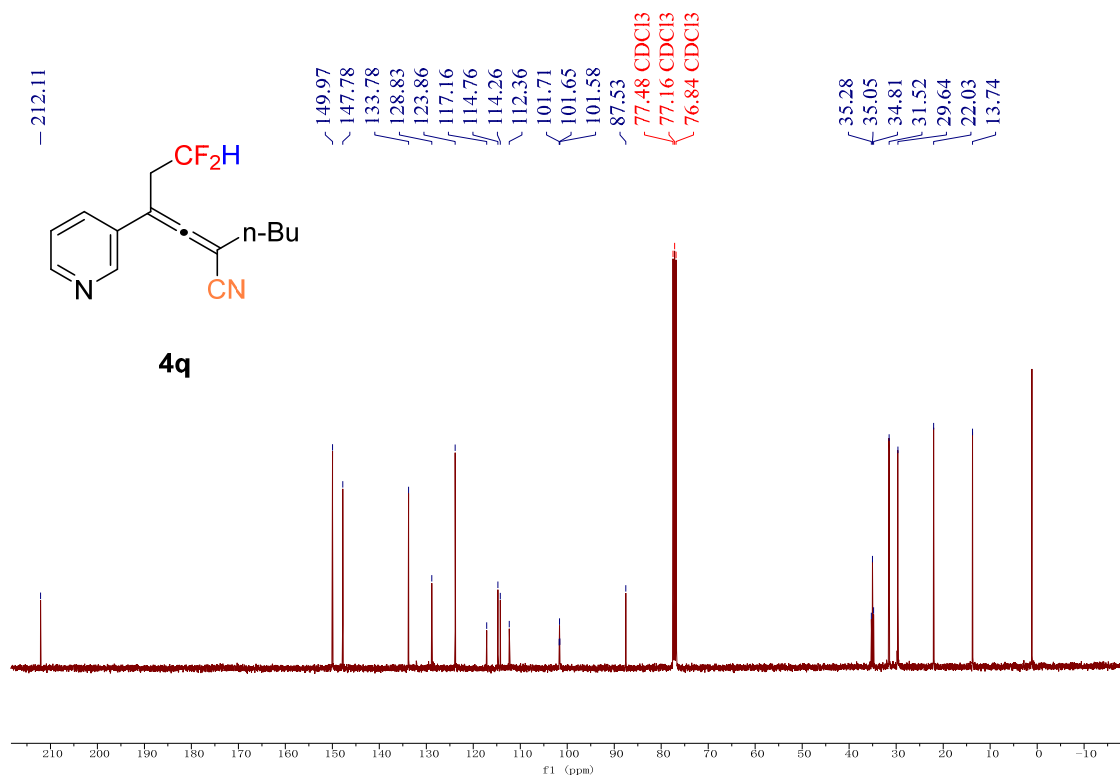

**<sup>19</sup>F NMR (376 MHz, CDCl<sub>3</sub>)**

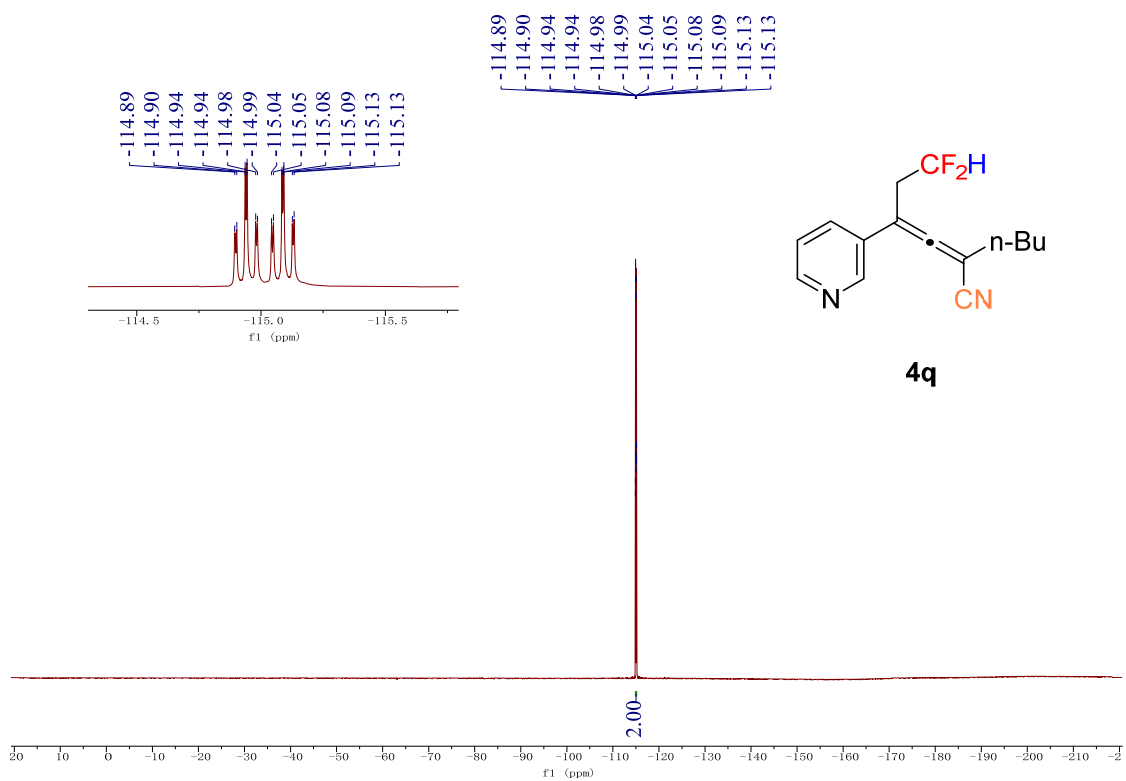

$^1\text{H NMR}$  (400 MHz,  $\text{CDCl}_3$ )

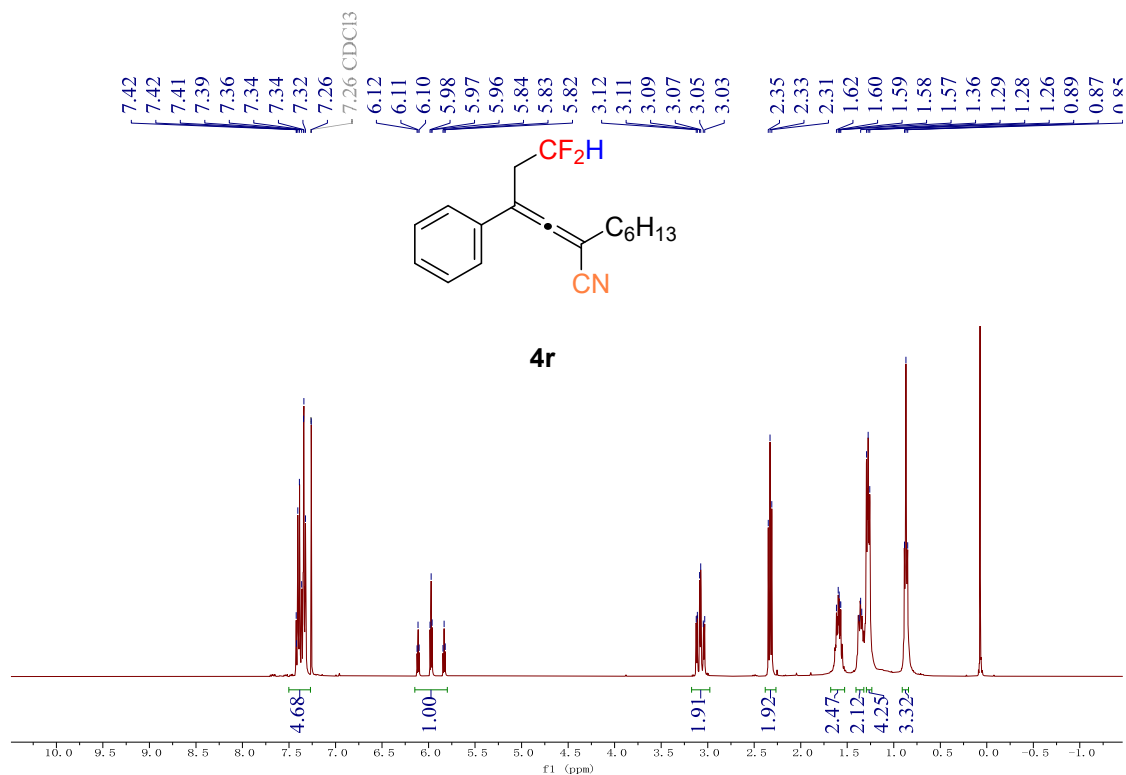

**<sup>13</sup>C NMR (101 MHz, CDCl<sub>3</sub>)**

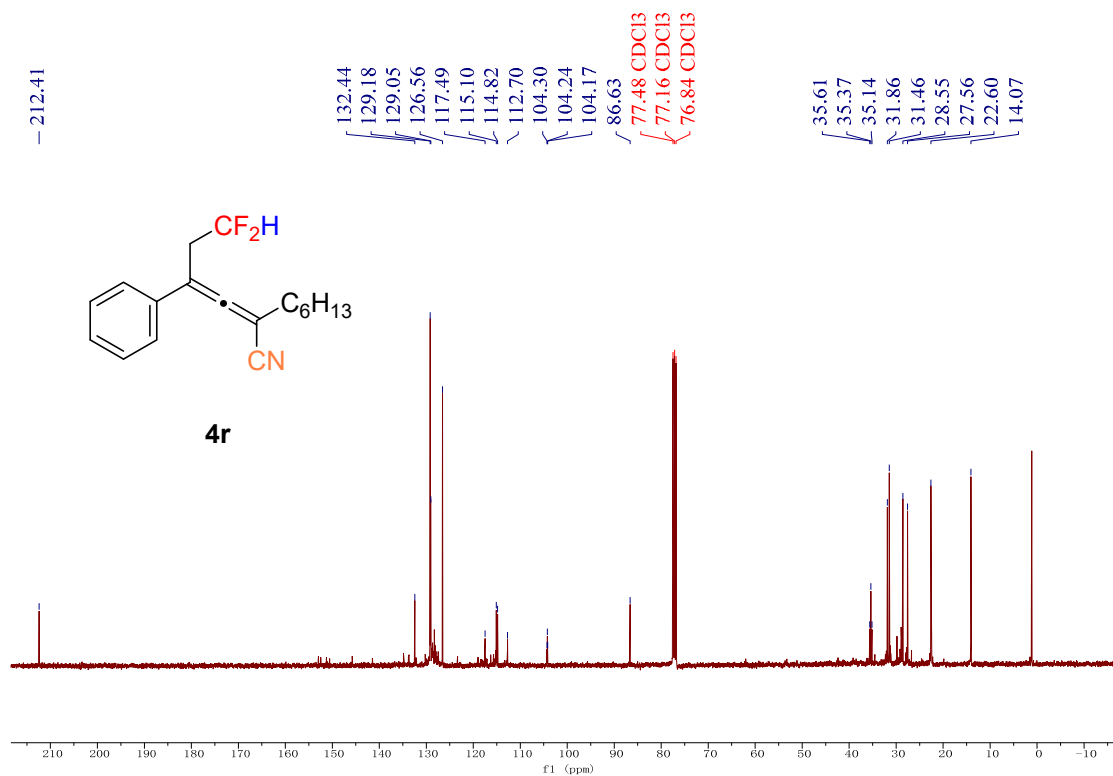

**<sup>19</sup>F NMR (376 MHz, CDCl<sub>3</sub>)**



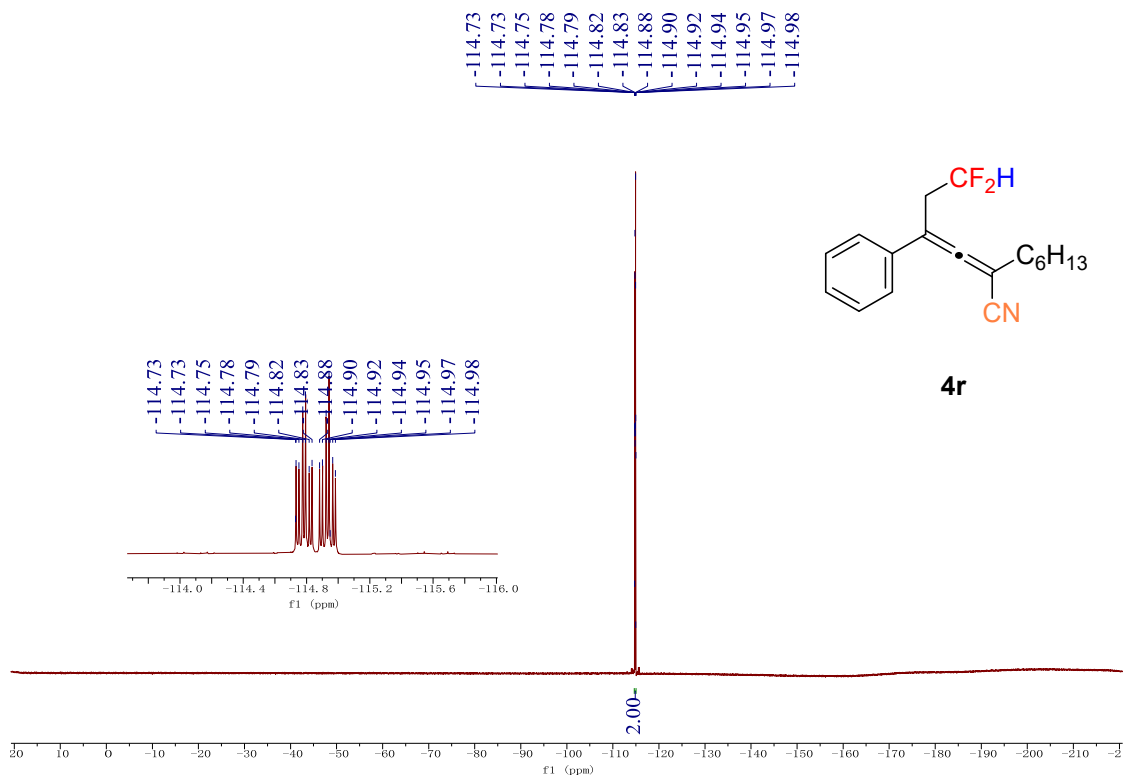

**<sup>1</sup>H NMR (400 MHz, CDCl<sub>3</sub>)**

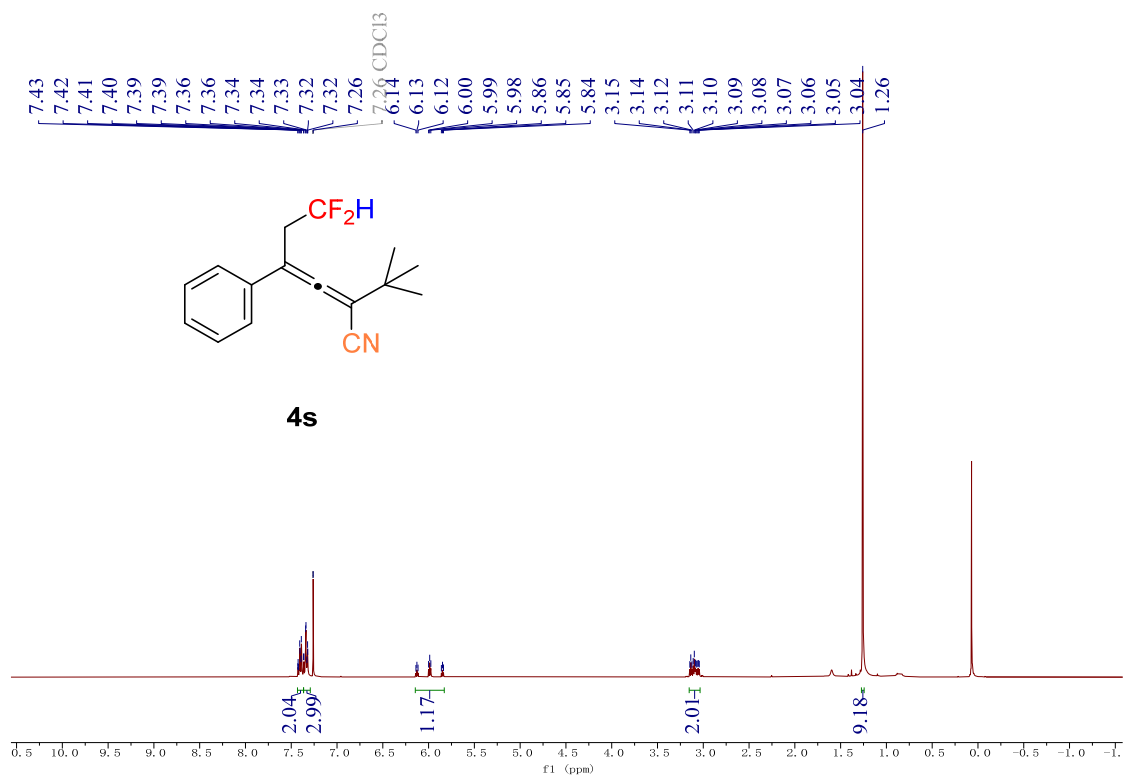

**<sup>13</sup>C NMR (101 MHz, CDCl<sub>3</sub>)**

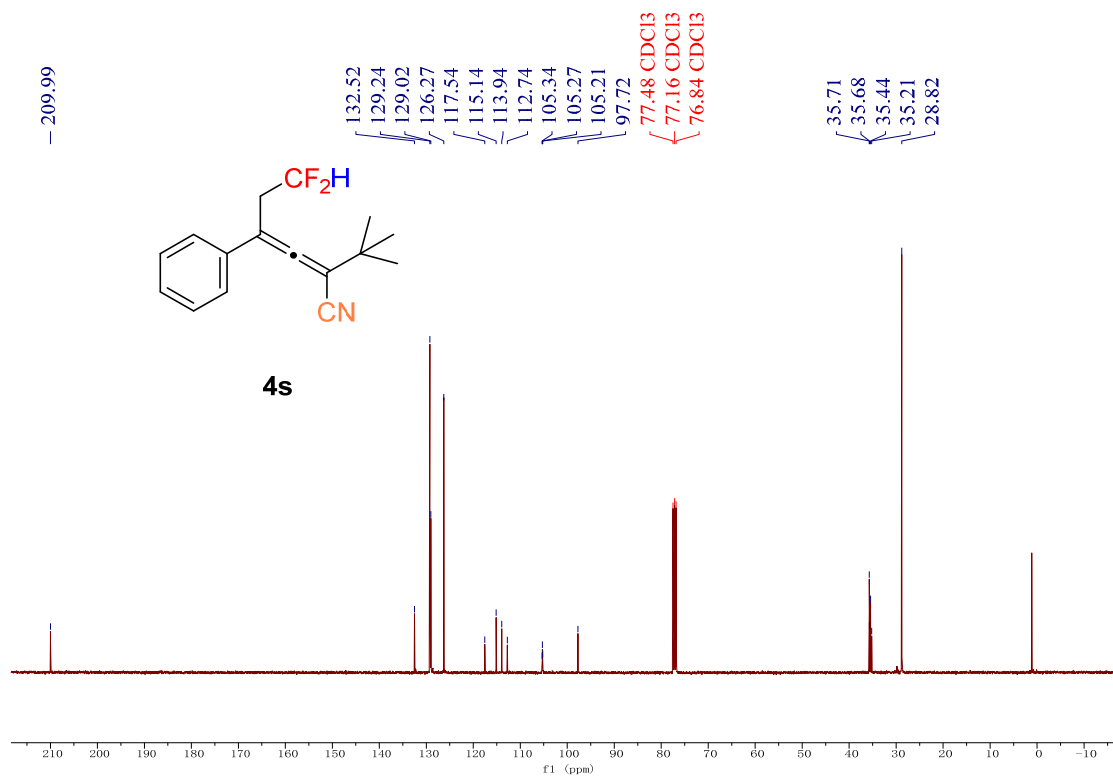

**<sup>19</sup>F NMR (376 MHz, CDCl<sub>3</sub>)**

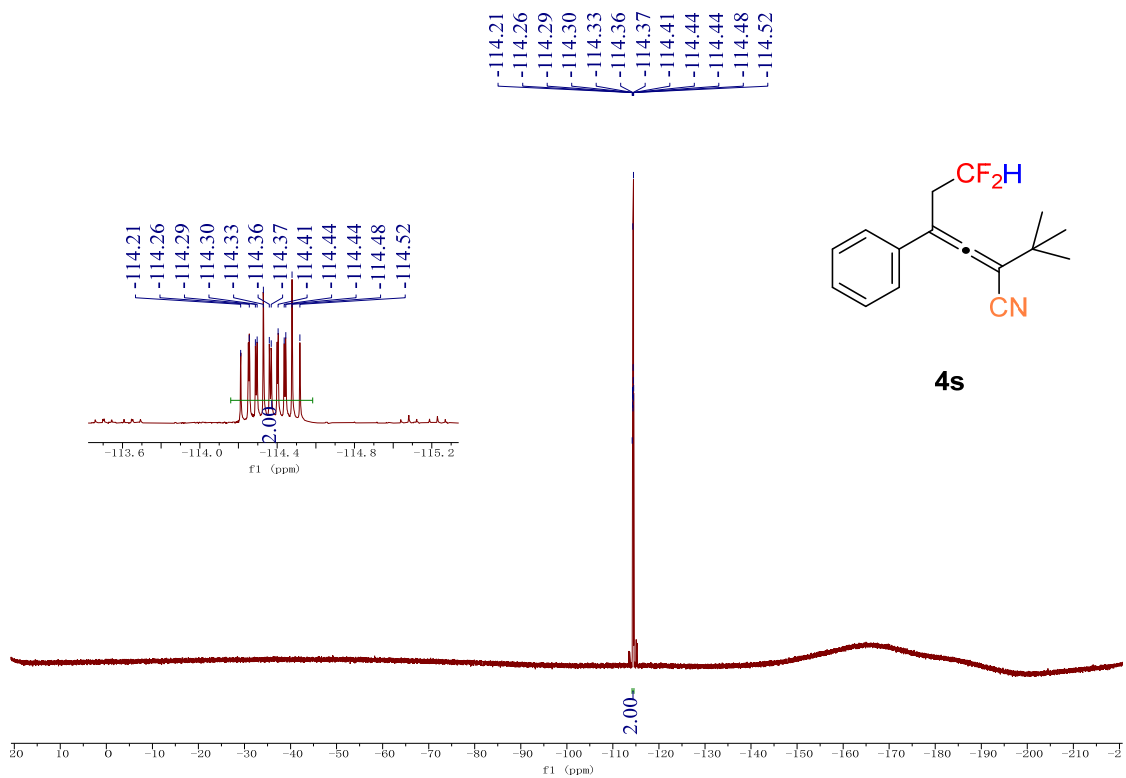

**<sup>1</sup>H NMR (400 MHz, CDCl<sub>3</sub>)**

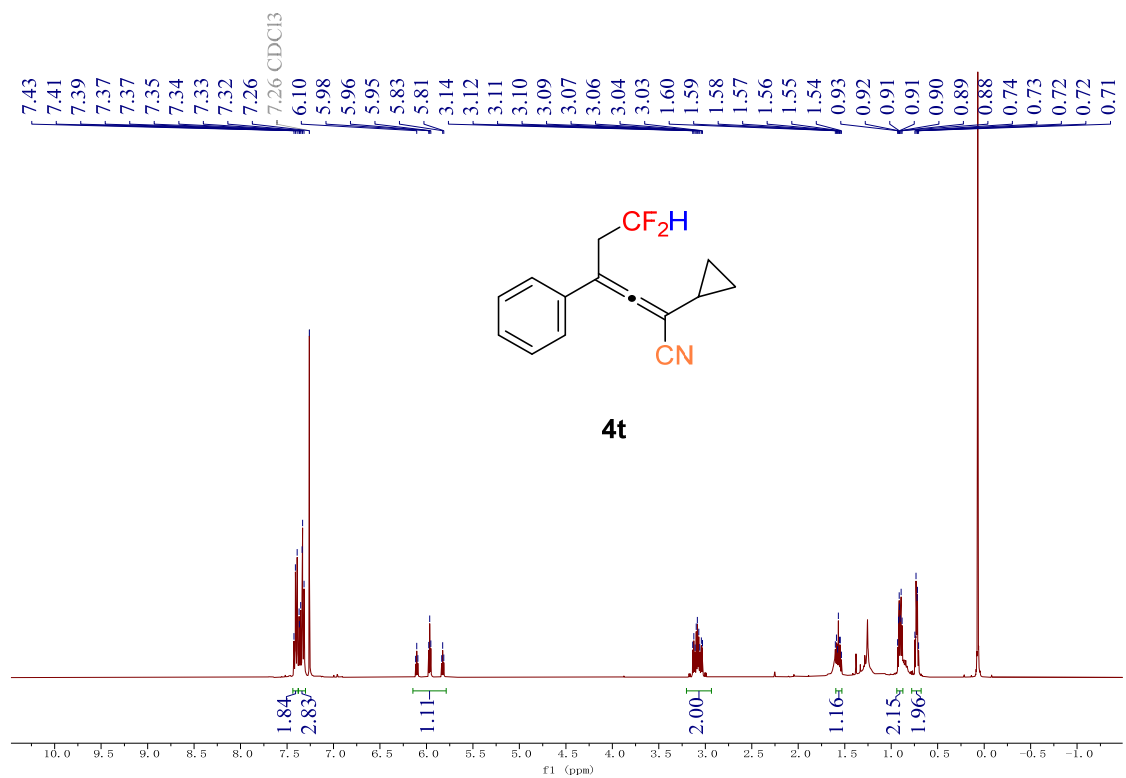

$^{13}\text{C}$  NMR (101 MHz,  $\text{CDCl}_3$ )

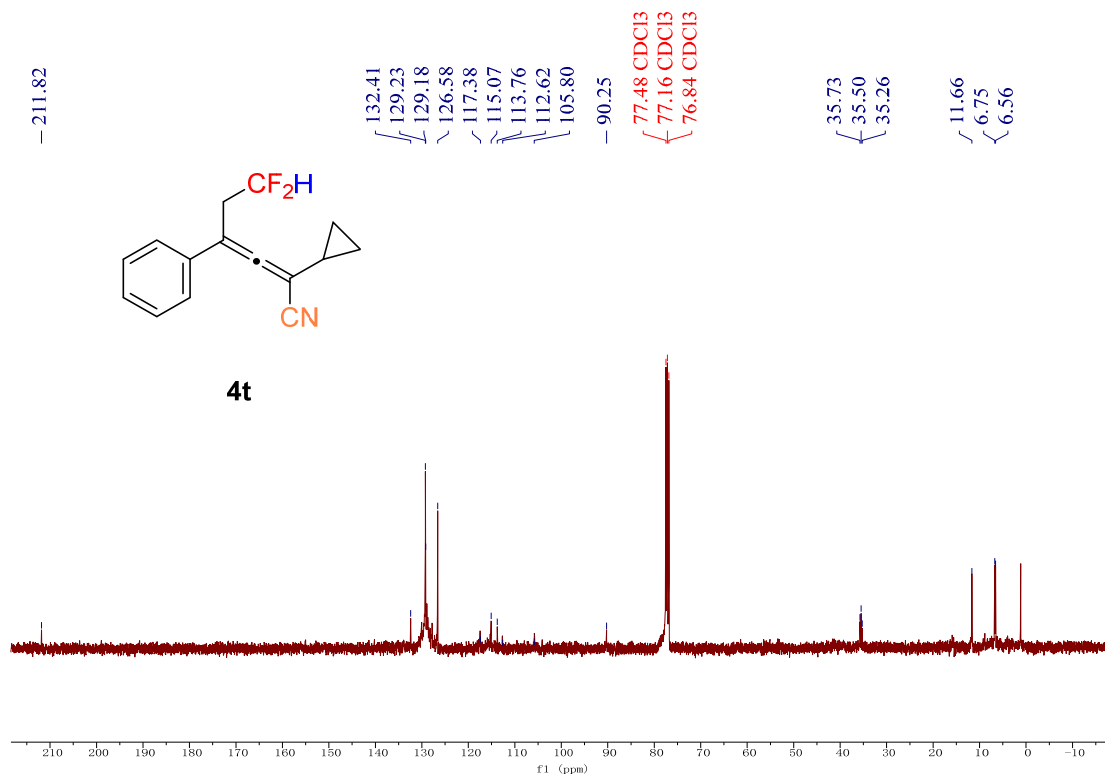

$^{19}\text{F}$  NMR (376 MHz,  $\text{CDCl}_3$ )

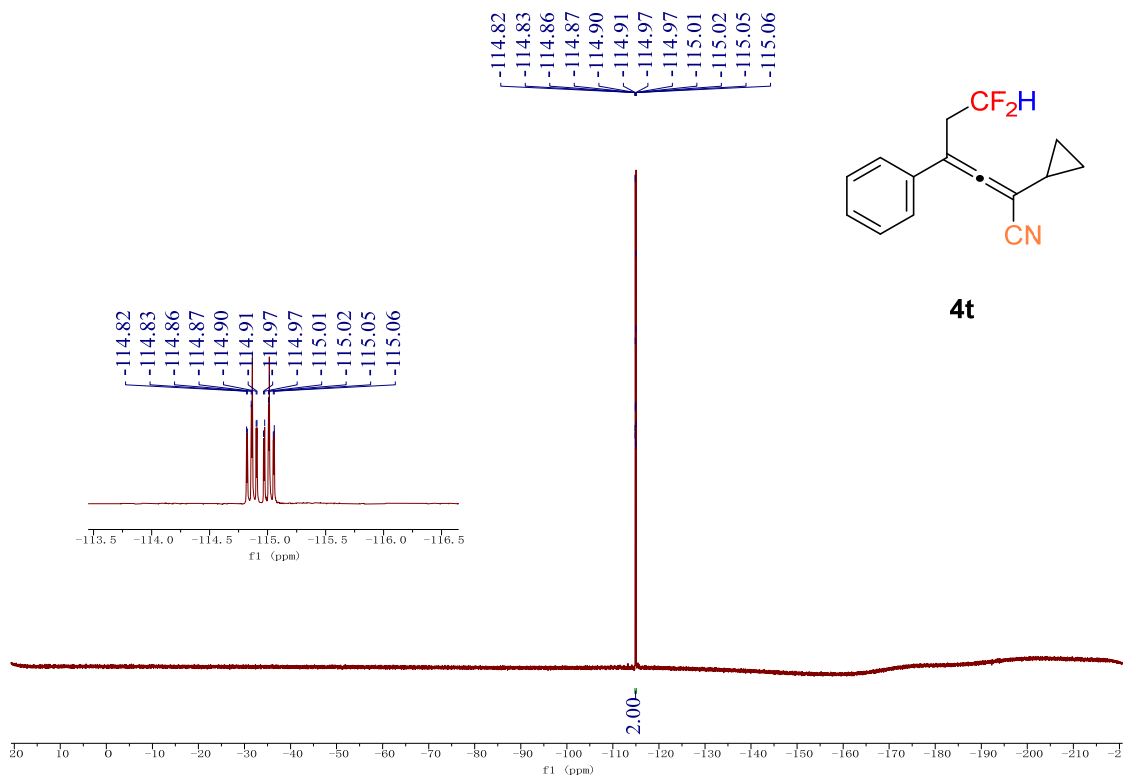

**<sup>1</sup>H NMR (400 MHz, CDCl<sub>3</sub>)**

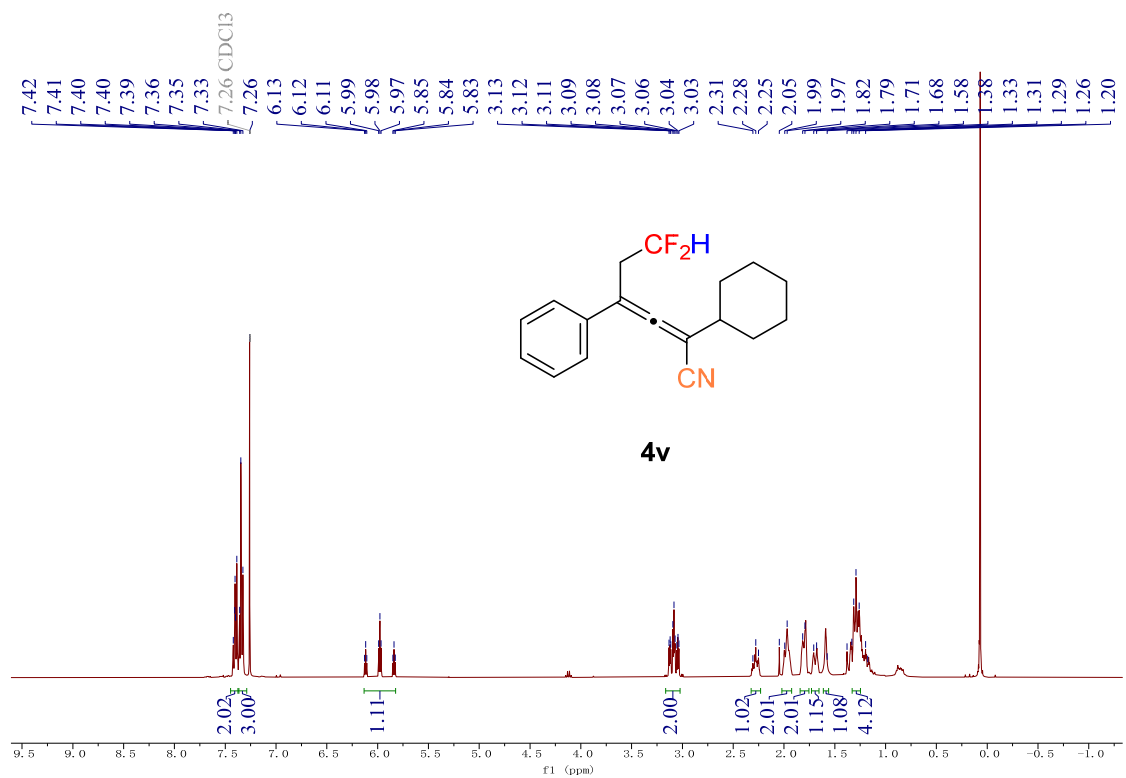

$^{13}\text{C}$  NMR (101 MHz,  $\text{CDCl}_3$ )

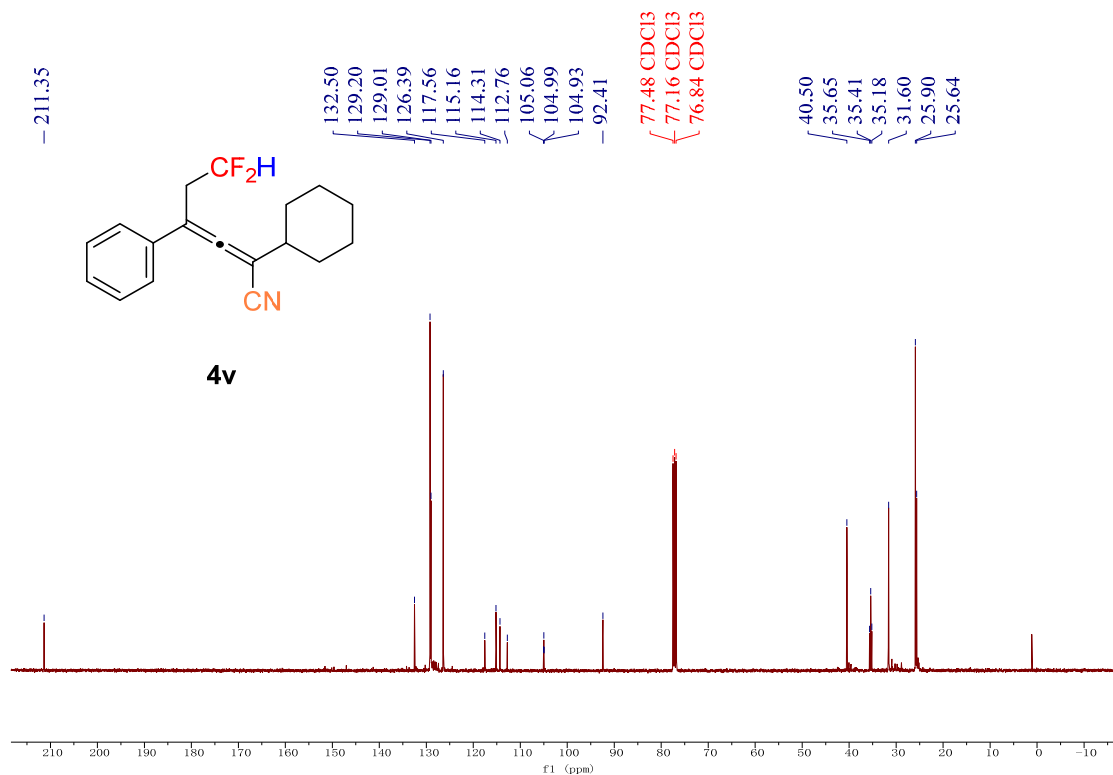

$^{19}\text{F}$  NMR (376 MHz,  $\text{CDCl}_3$ )

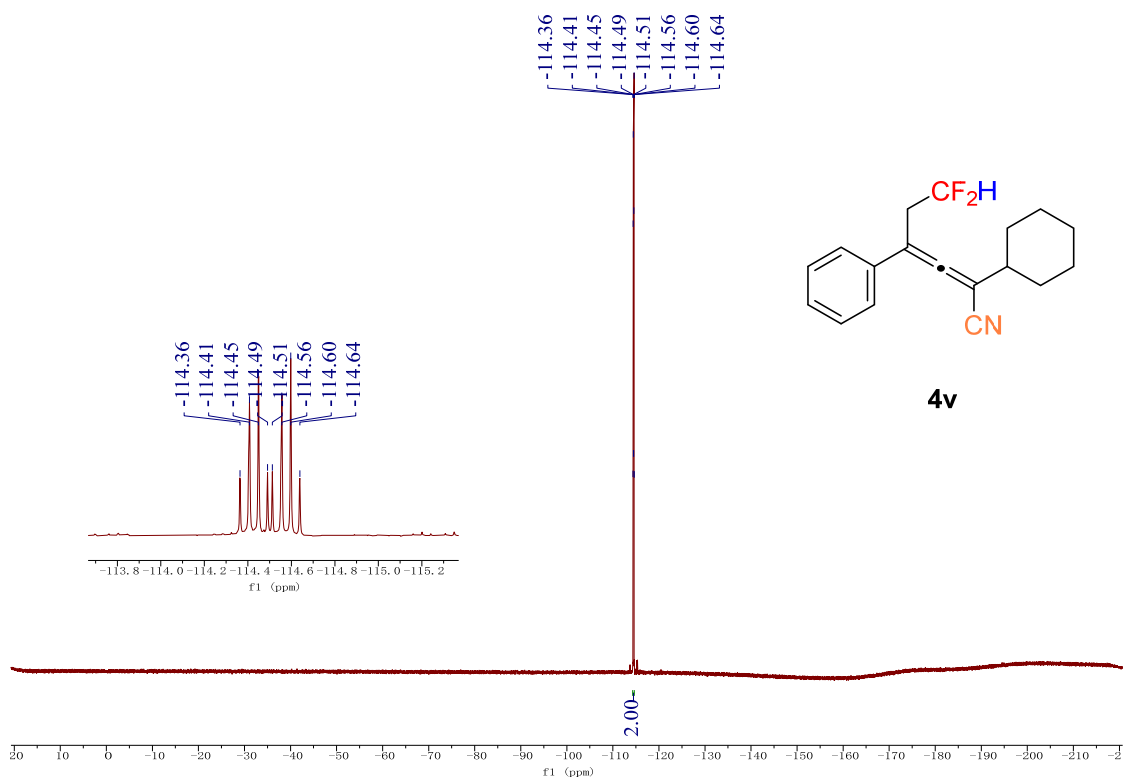

**<sup>1</sup>H NMR (400 MHz, CDCl<sub>3</sub>)**

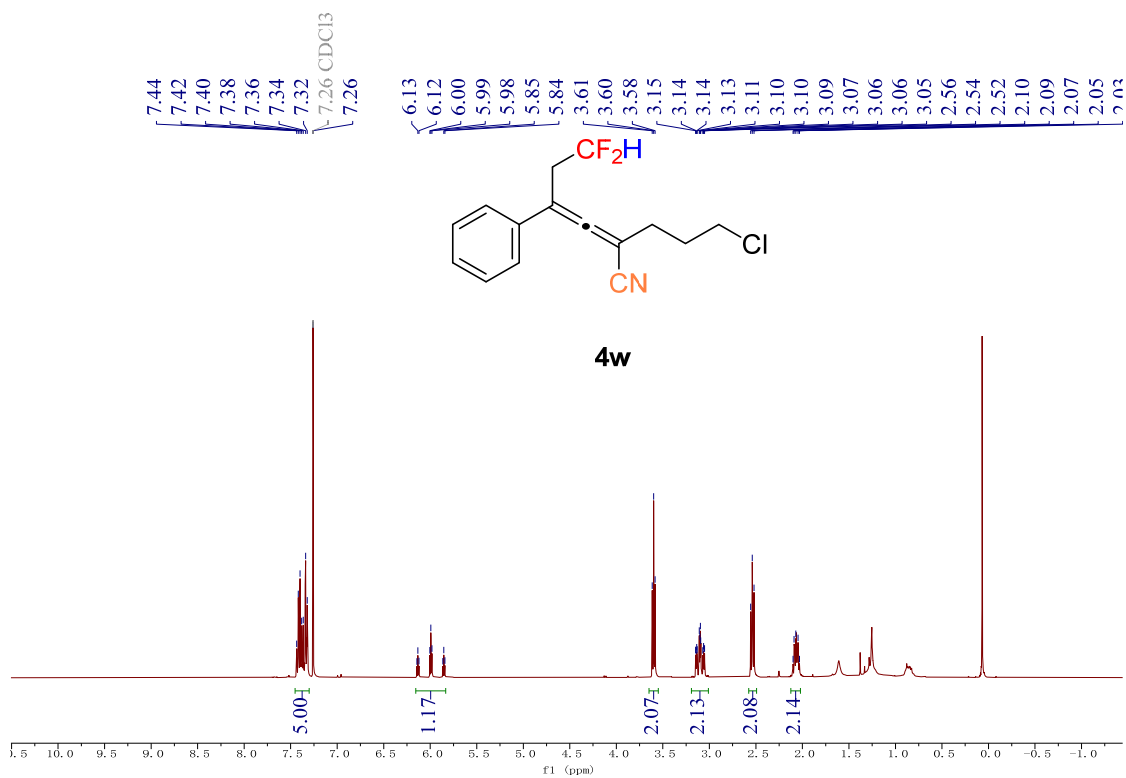

$^{13}\text{C}$  NMR (101 MHz,  $\text{CDCl}_3$ )

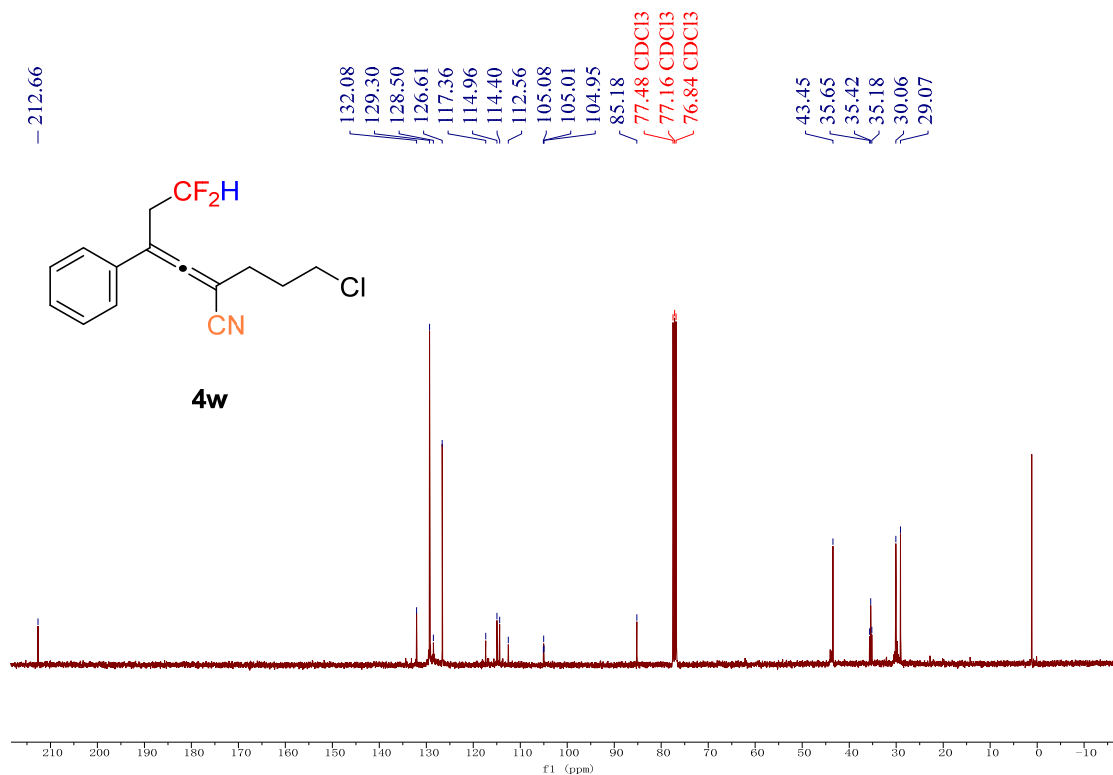

$^{19}\text{F}$  NMR (376 MHz,  $\text{CDCl}_3$ )



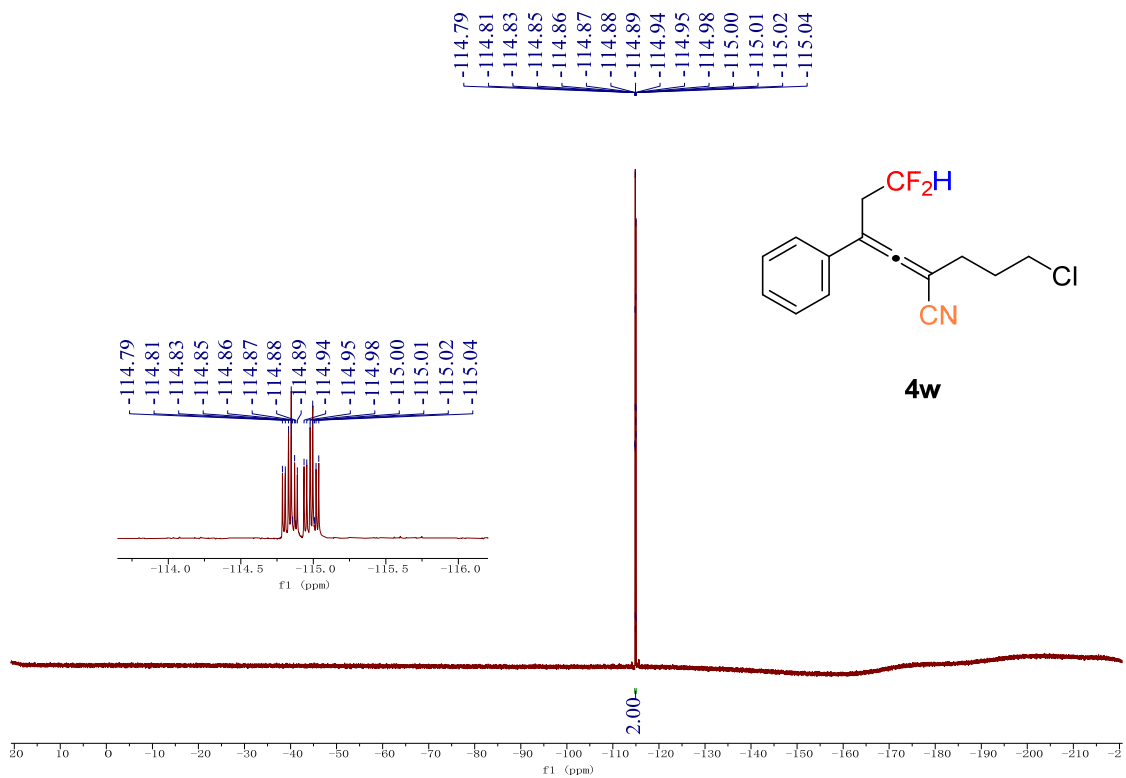

**<sup>1</sup>H NMR (400 MHz, CDCl<sub>3</sub>)**

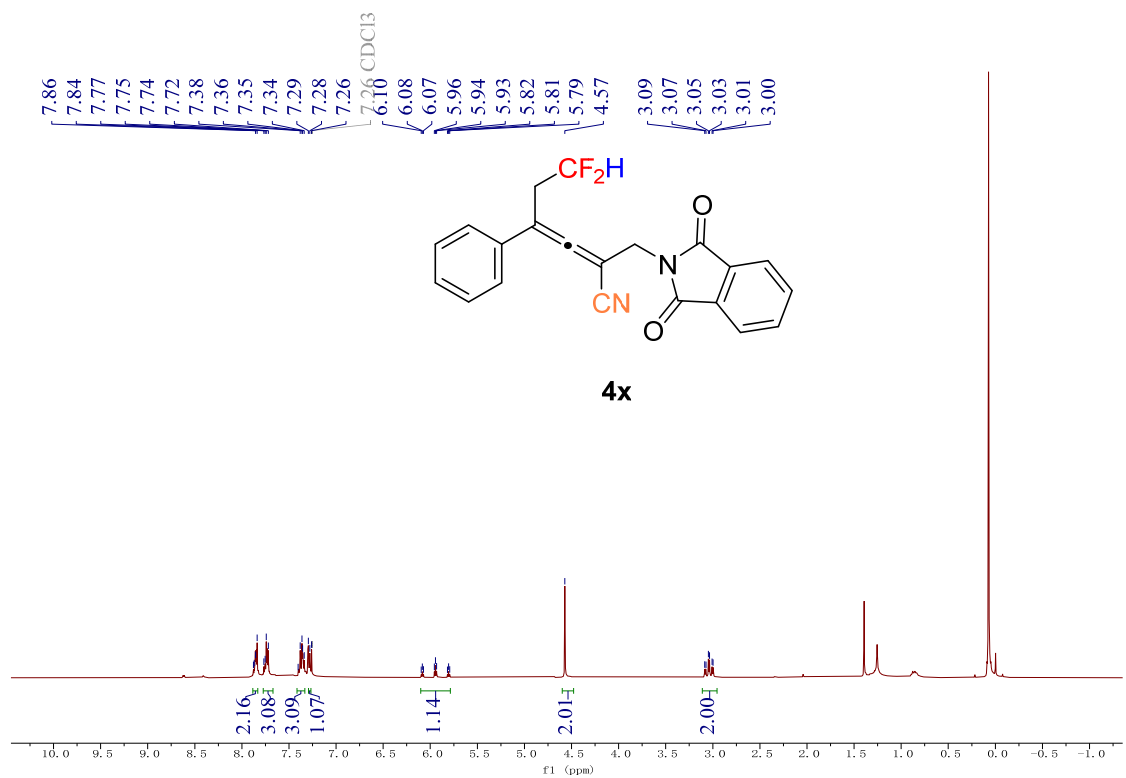

$^{13}\text{C}$  NMR (101 MHz,  $\text{CDCl}_3$ )

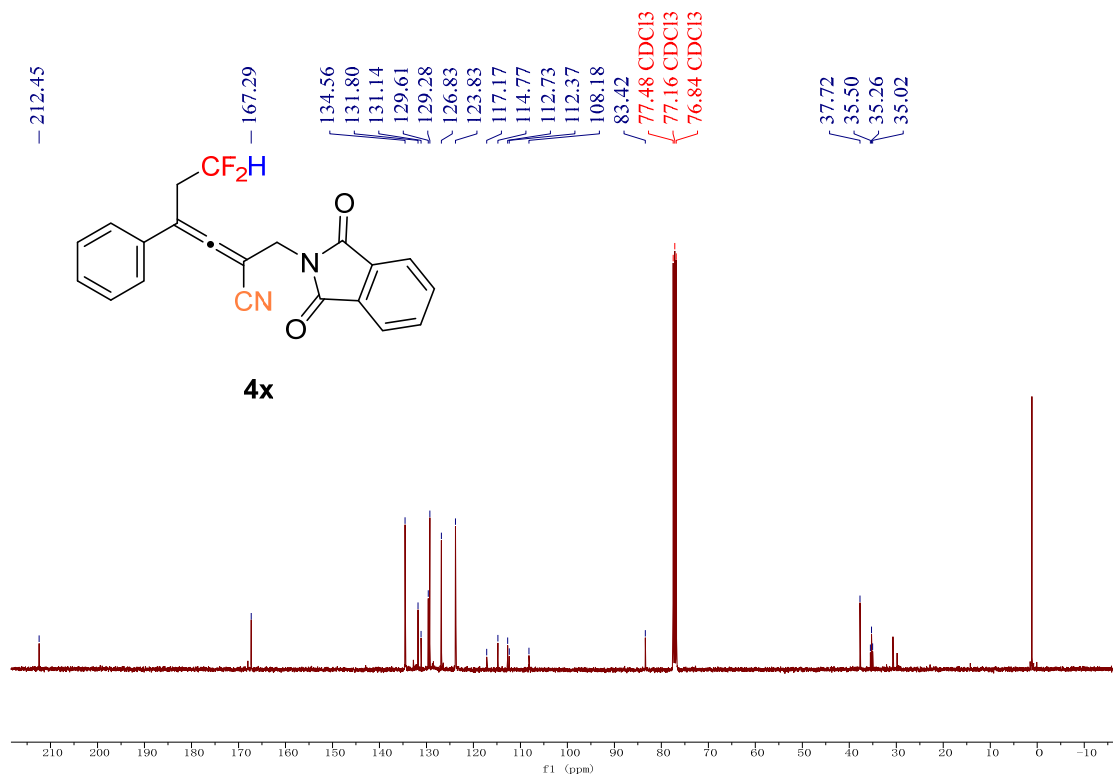

$^{19}\text{F}$  NMR (377 MHz,  $\text{CDCl}_3$ )

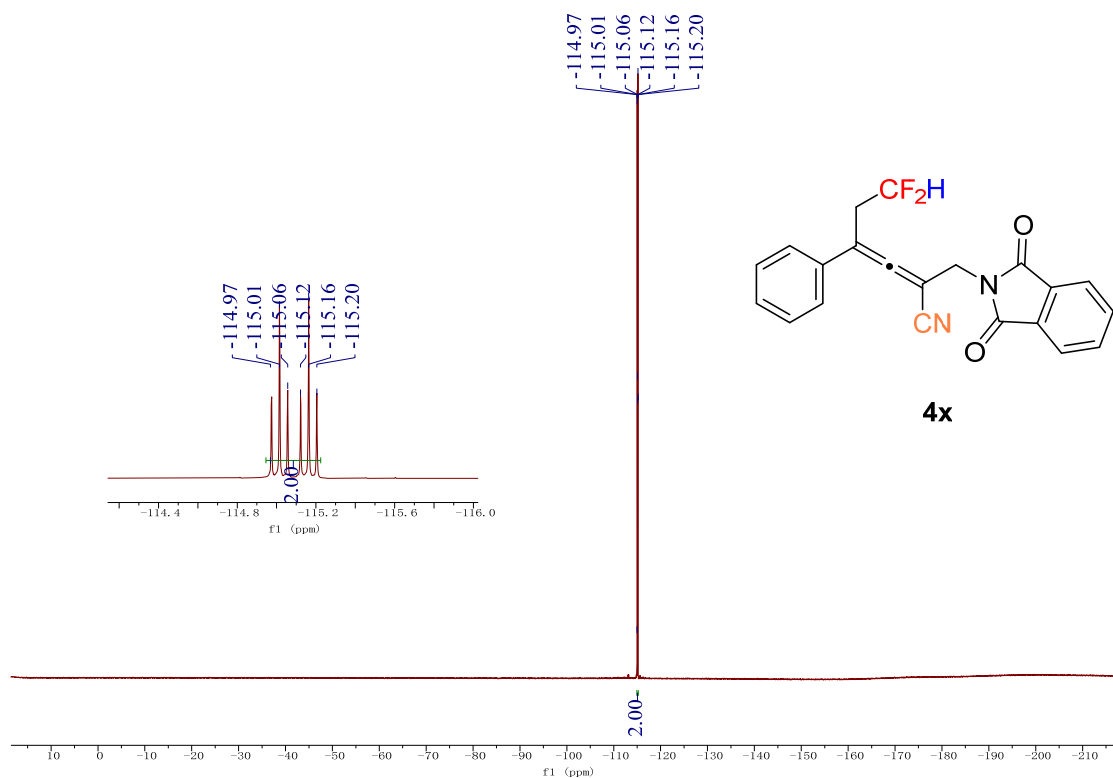

**<sup>1</sup>H NMR (400 MHz, CDCl<sub>3</sub>)**

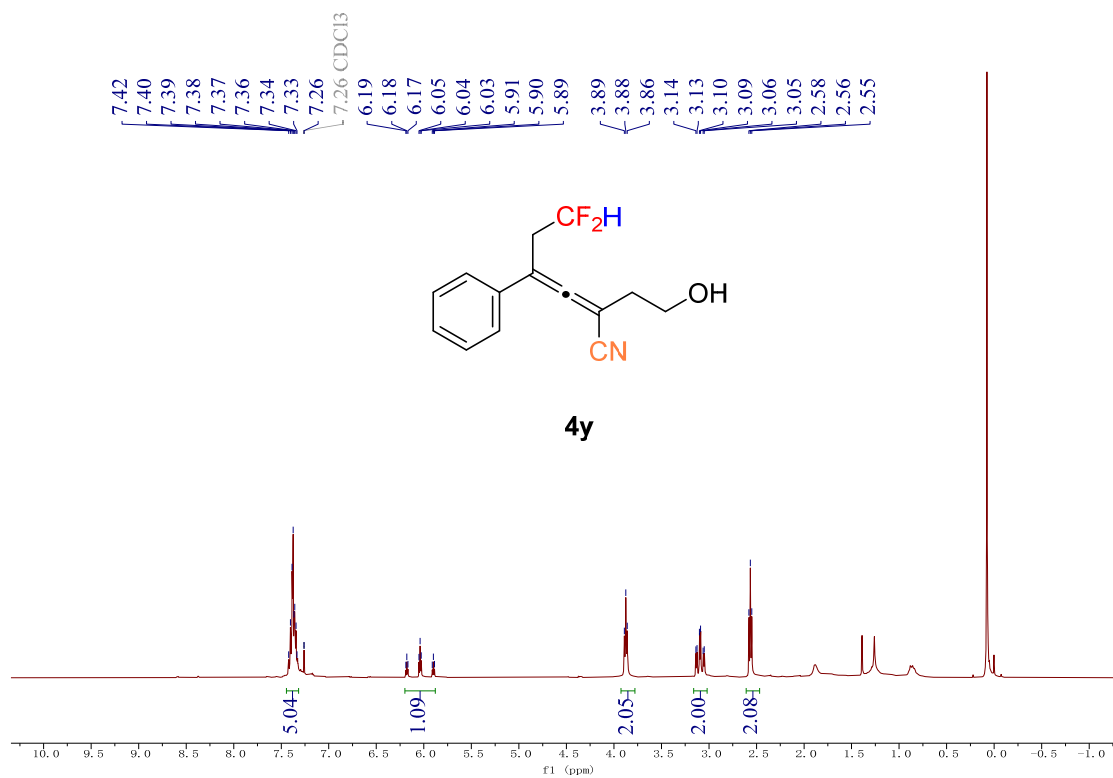

$^{13}\text{C}$  NMR (101 MHz,  $\text{CDCl}_3$ )

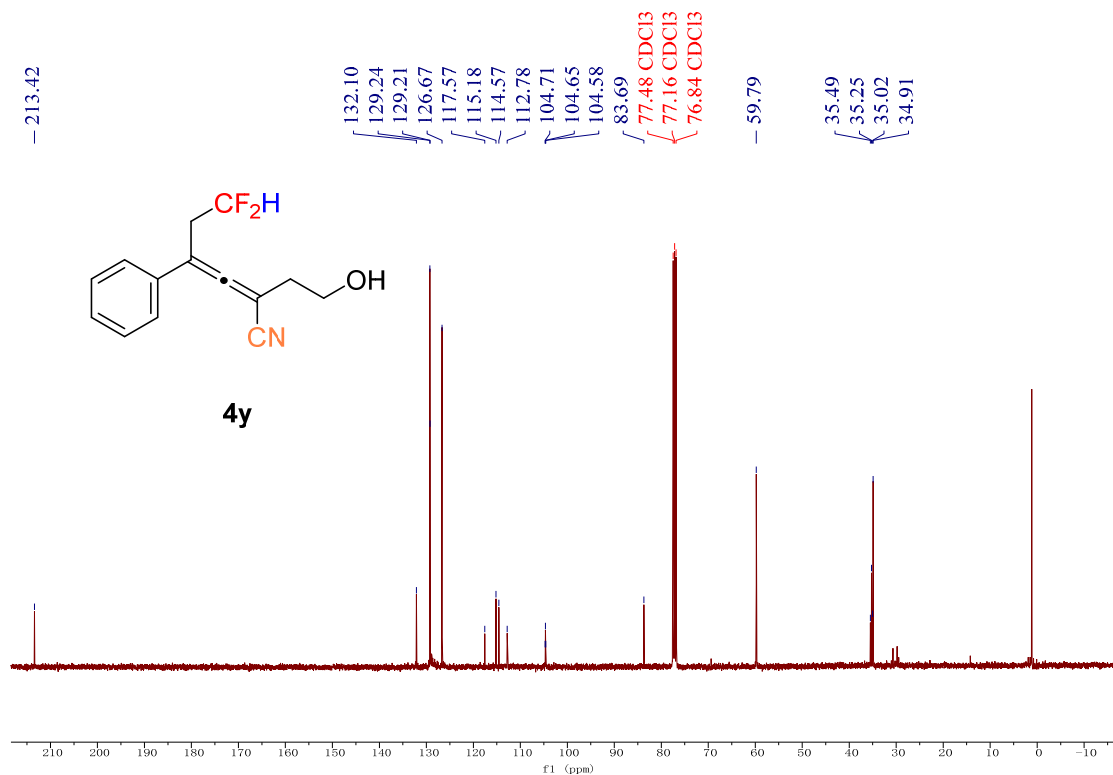

$^{19}\text{F}$  NMR (376 MHz,  $\text{CDCl}_3$ )

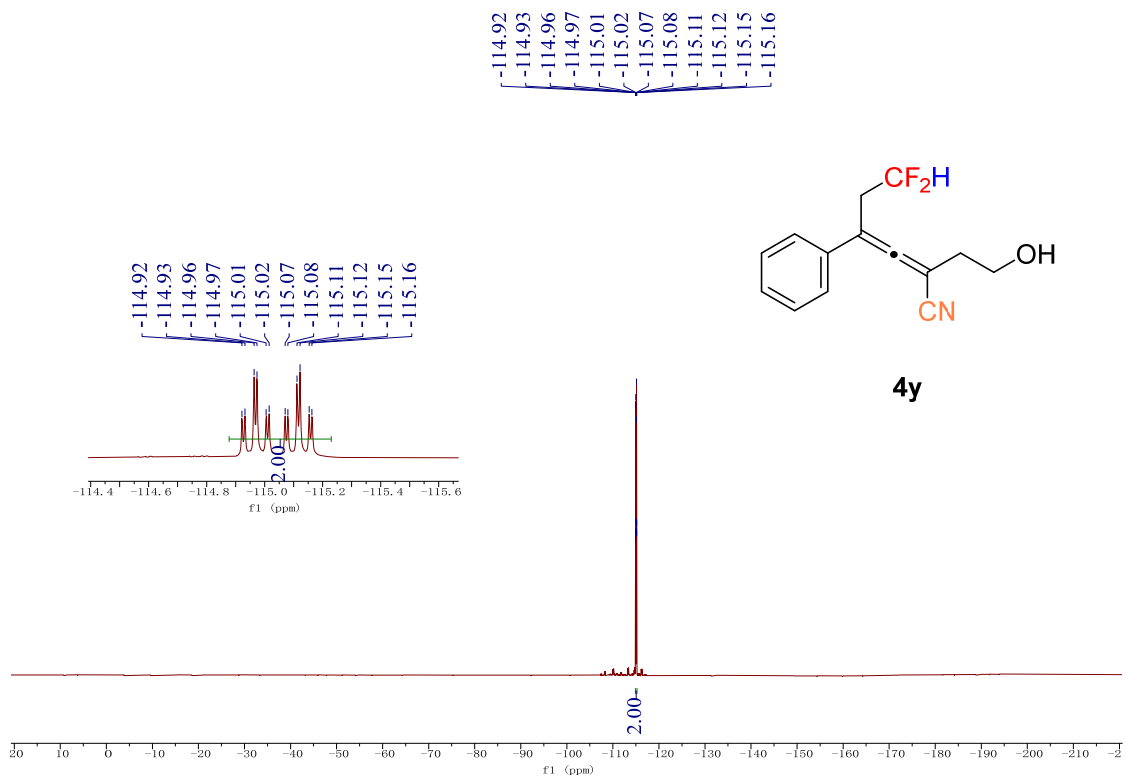

**<sup>1</sup>H NMR (400 MHz, CDCl<sub>3</sub>)**

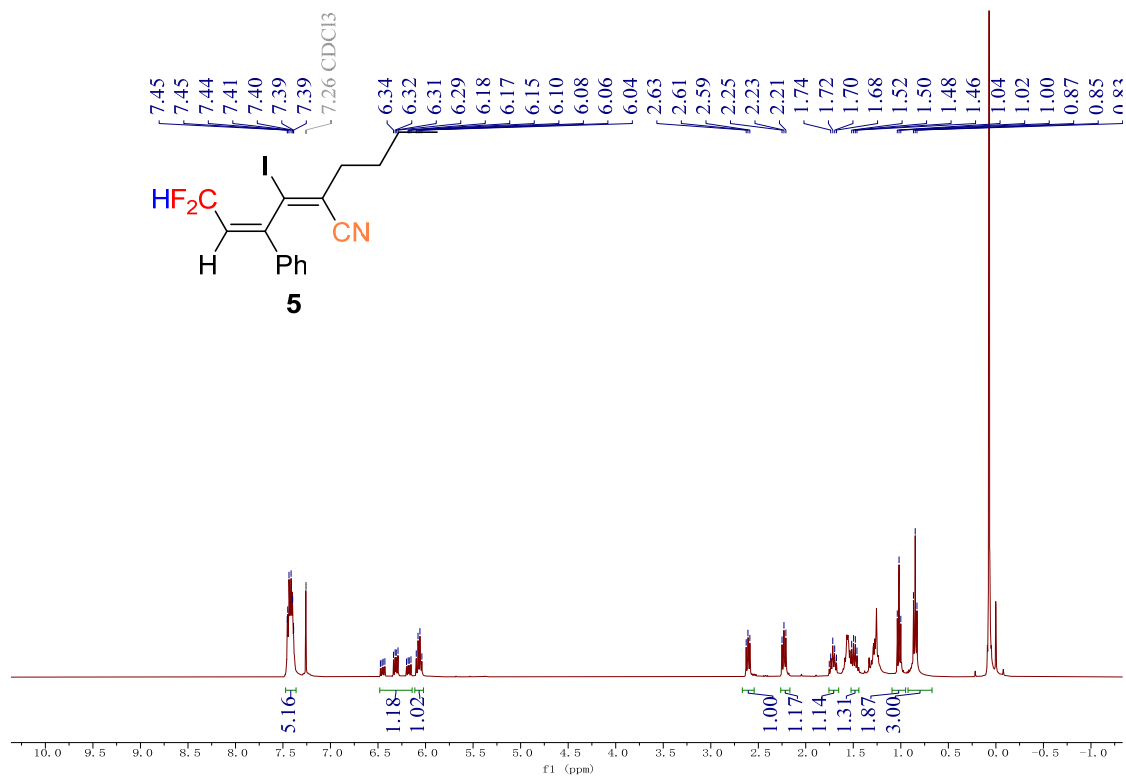

$^{13}\text{C}$  NMR (101 MHz,  $\text{CDCl}_3$ )

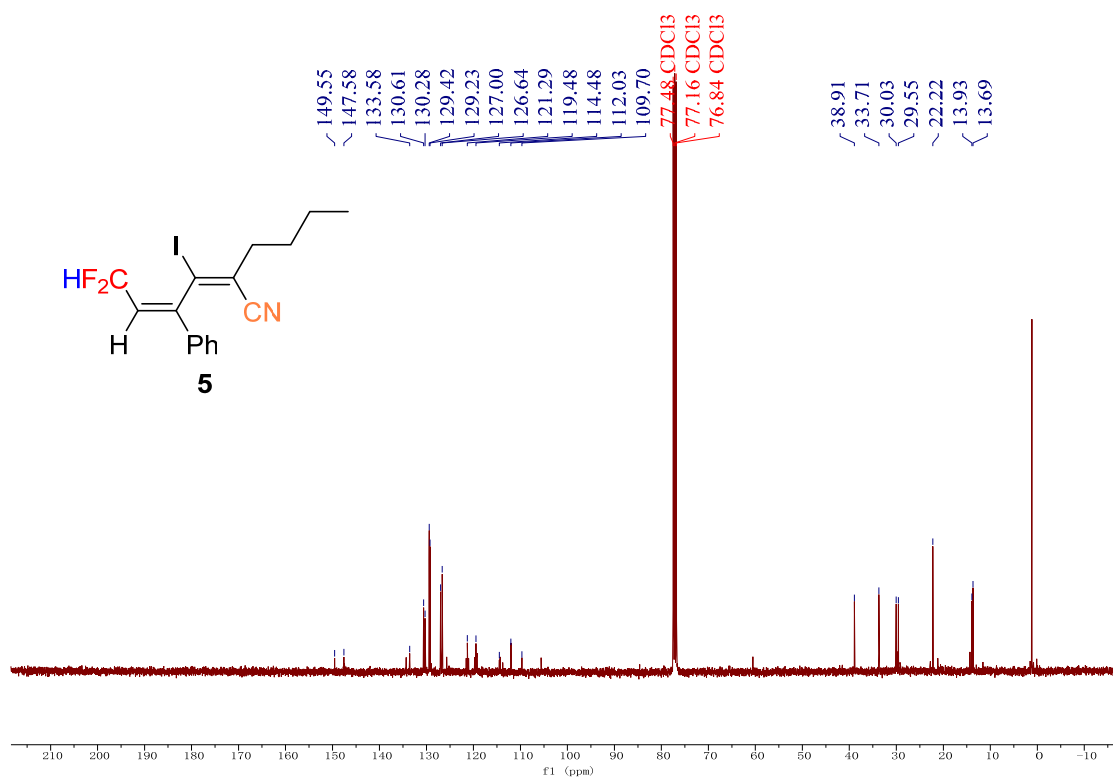

$^{19}\text{F}$  NMR (376 MHz,  $\text{CDCl}_3$ )

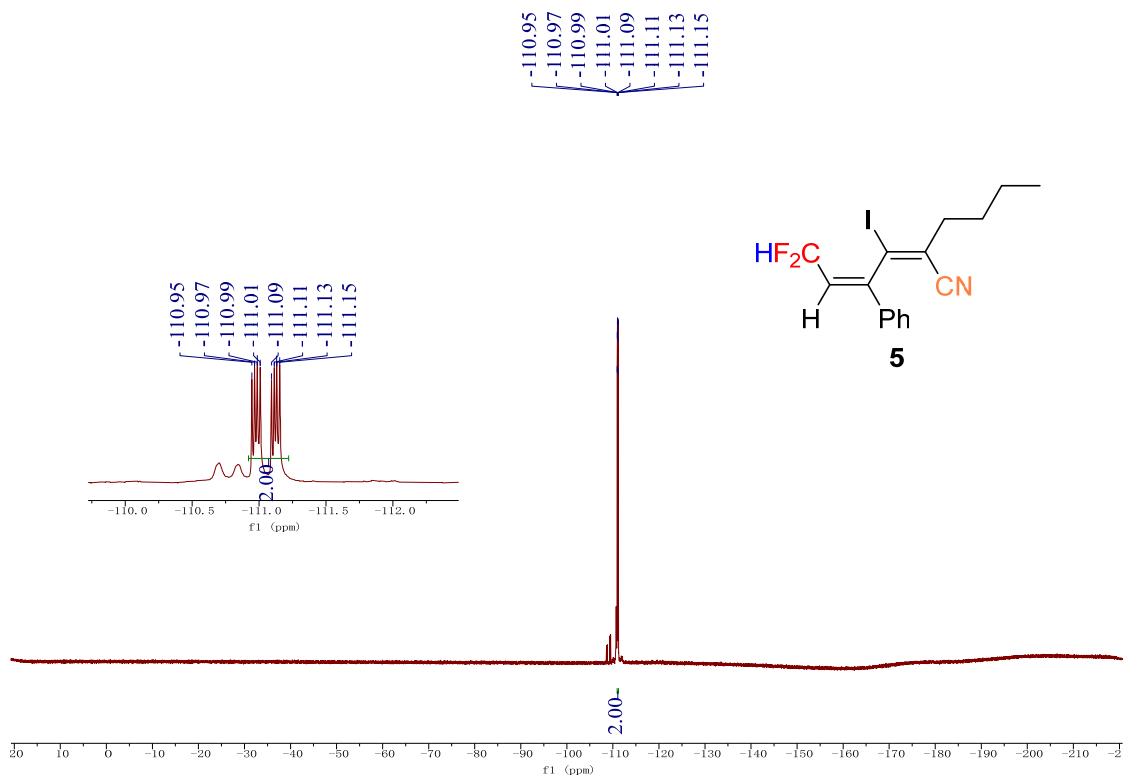

**<sup>1</sup>H NMR (400 MHz, CDCl<sub>3</sub>)**

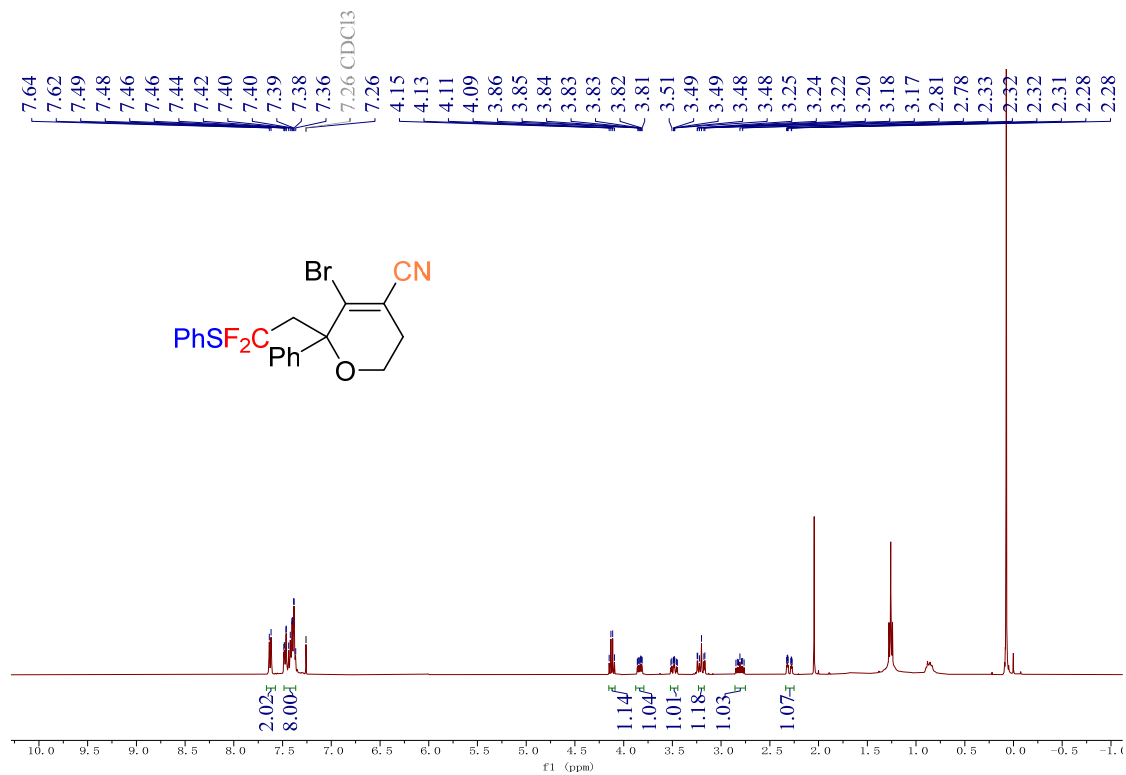

$^{13}\text{C}$  NMR (101 MHz,  $\text{CDCl}_3$ )

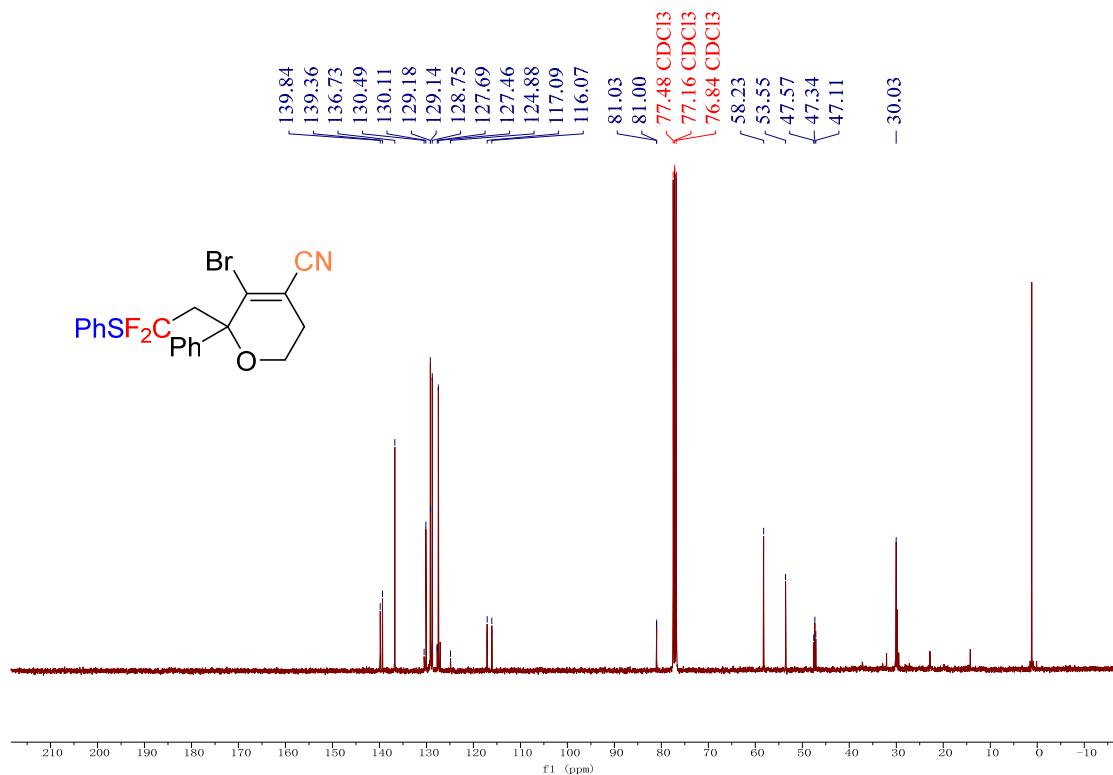

$^{19}\text{F}$  NMR (376 MHz,  $\text{CDCl}_3$ )



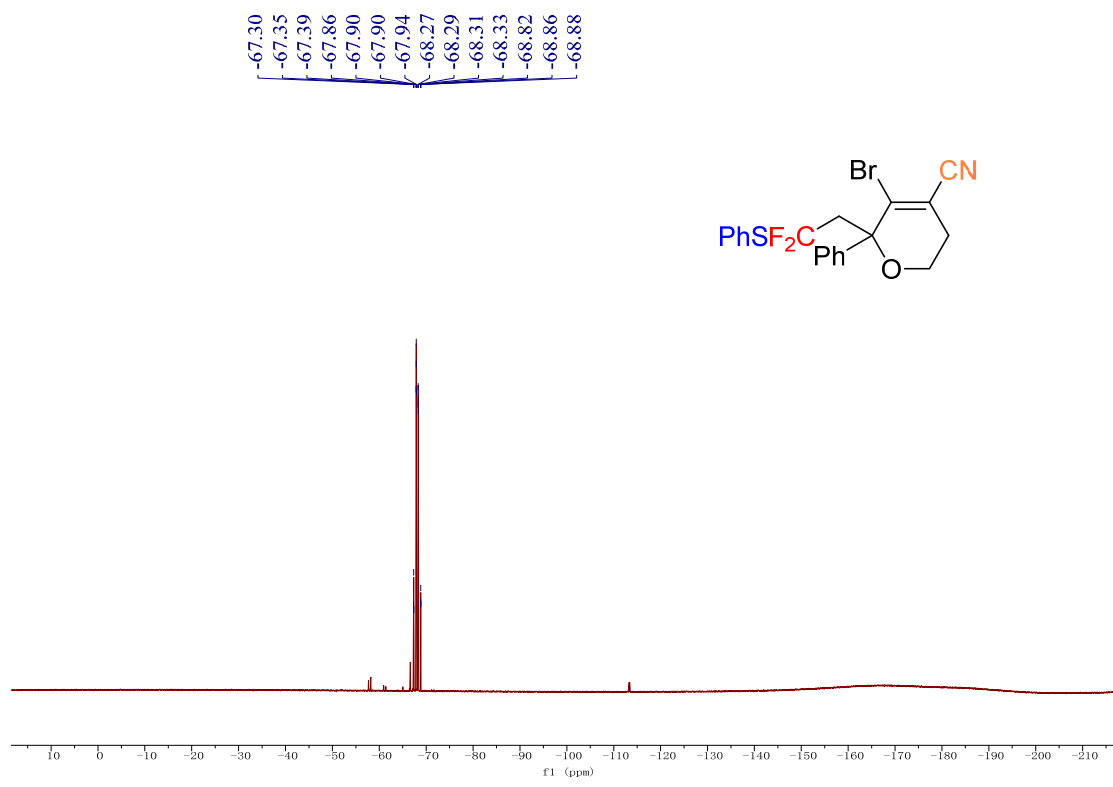

$^1\text{H}$  NMR (400 MHz,  $\text{CDCl}_3$ )

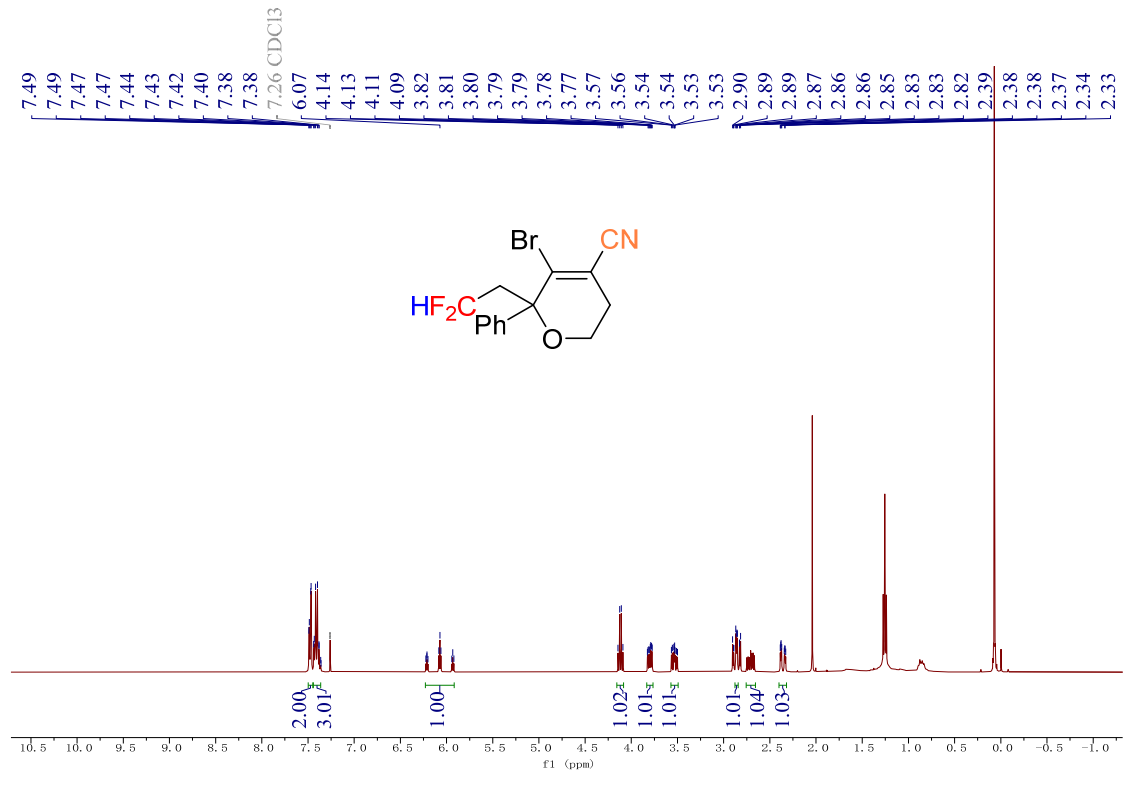

**$^{13}\text{C}$  NMR (101 MHz,  $\text{CDCl}_3$ )**

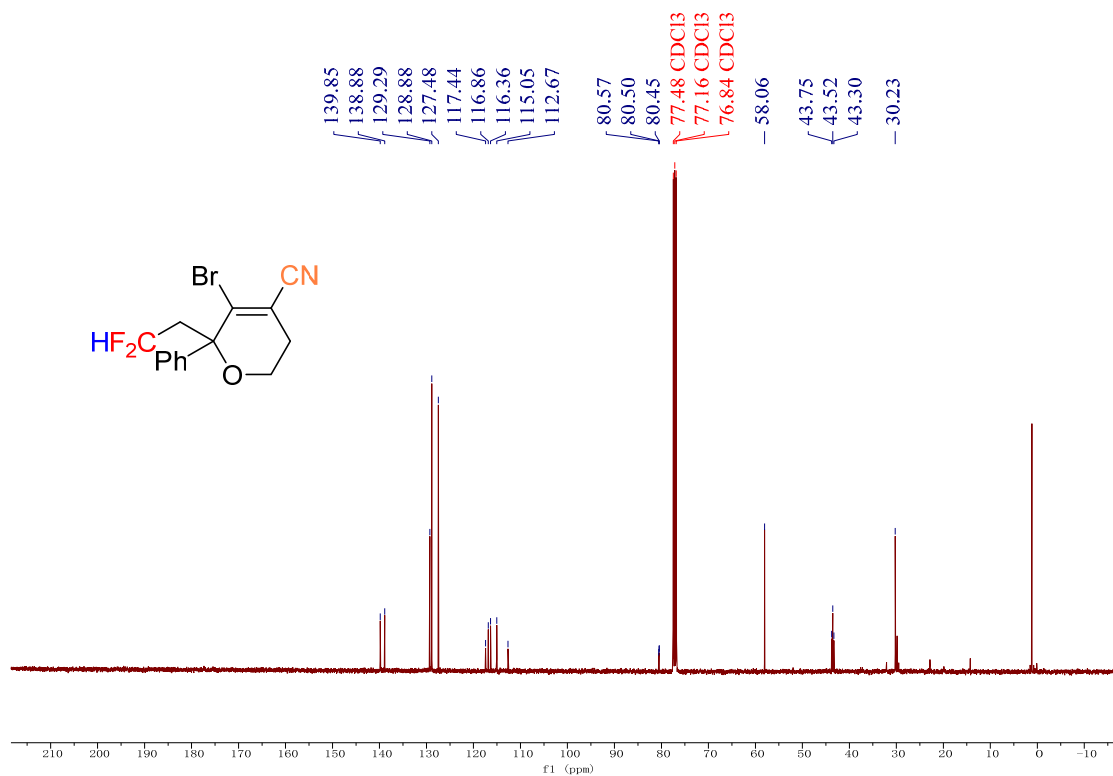

**$^{19}\text{F}$  NMR (376 MHz,  $\text{CDCl}_3$ )**





**<sup>13</sup>C NMR (101 MHz, CDCl<sub>3</sub>)**

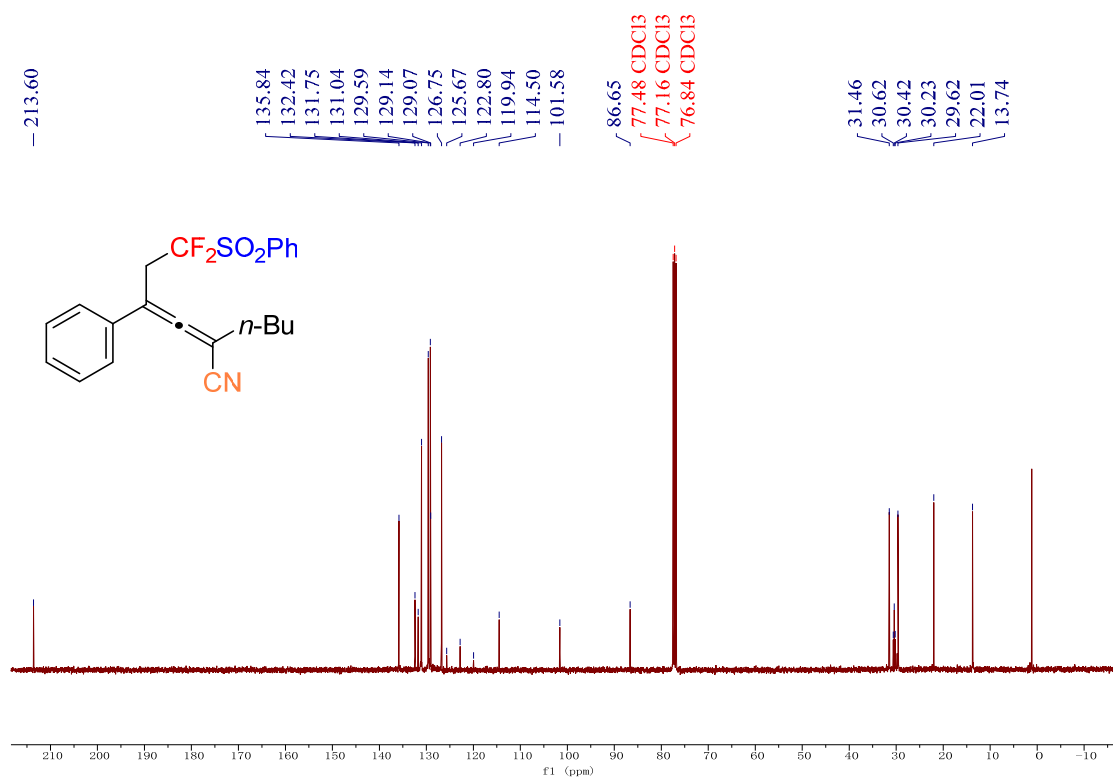

**<sup>19</sup>F NMR (376 MHz, CDCl<sub>3</sub>)**

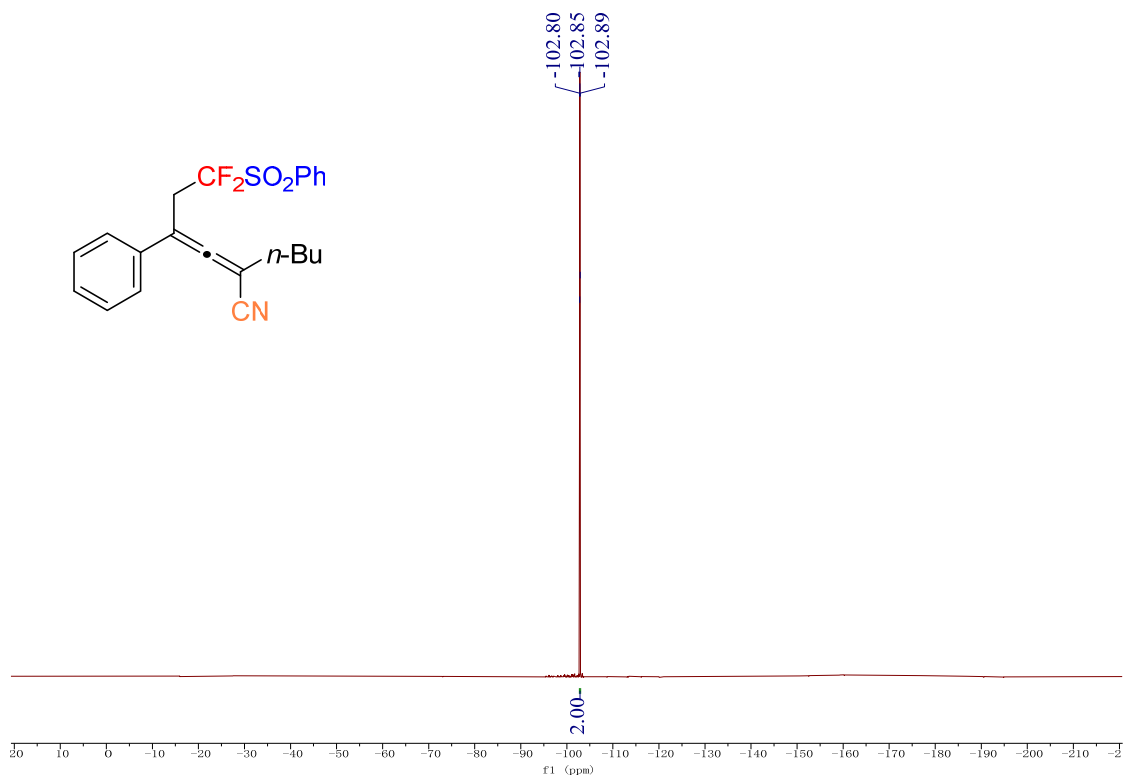

$^1\text{H}$  NMR (400 MHz,  $\text{CDCl}_3$ )

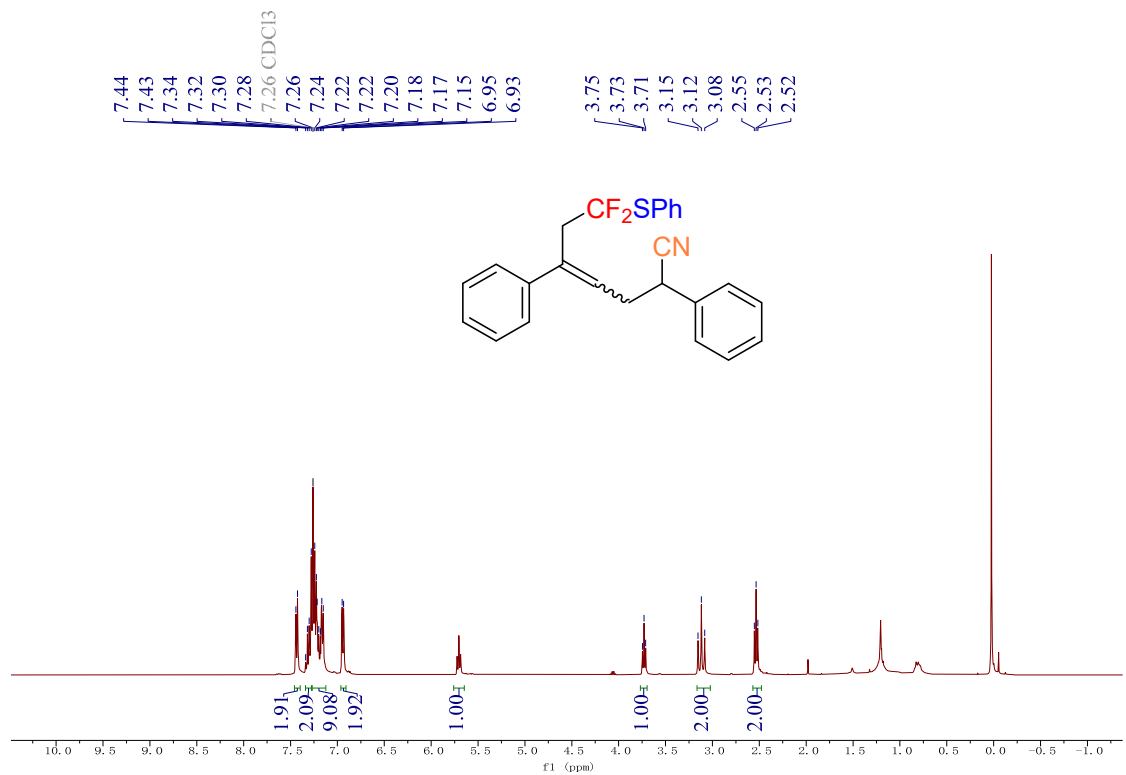

**$^{13}\text{C}$  NMR (101 MHz,  $\text{CDCl}_3$ )**

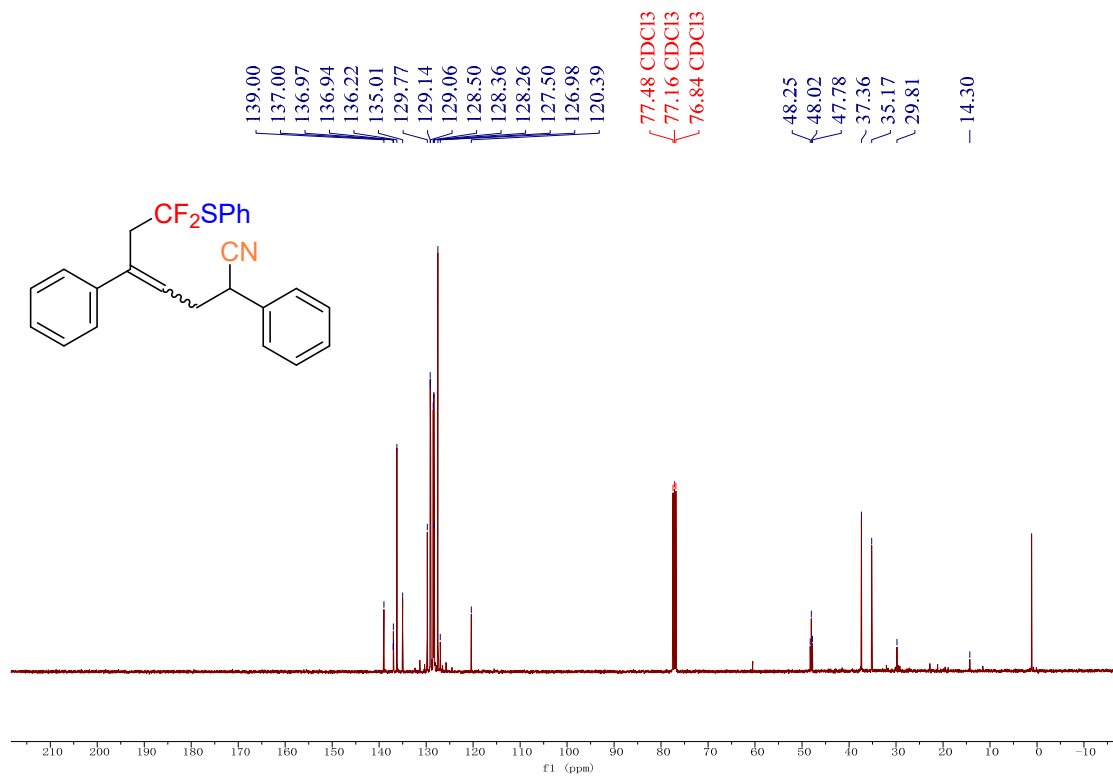

**$^{19}\text{F}$  NMR (376 MHz,  $\text{CDCl}_3$ )**

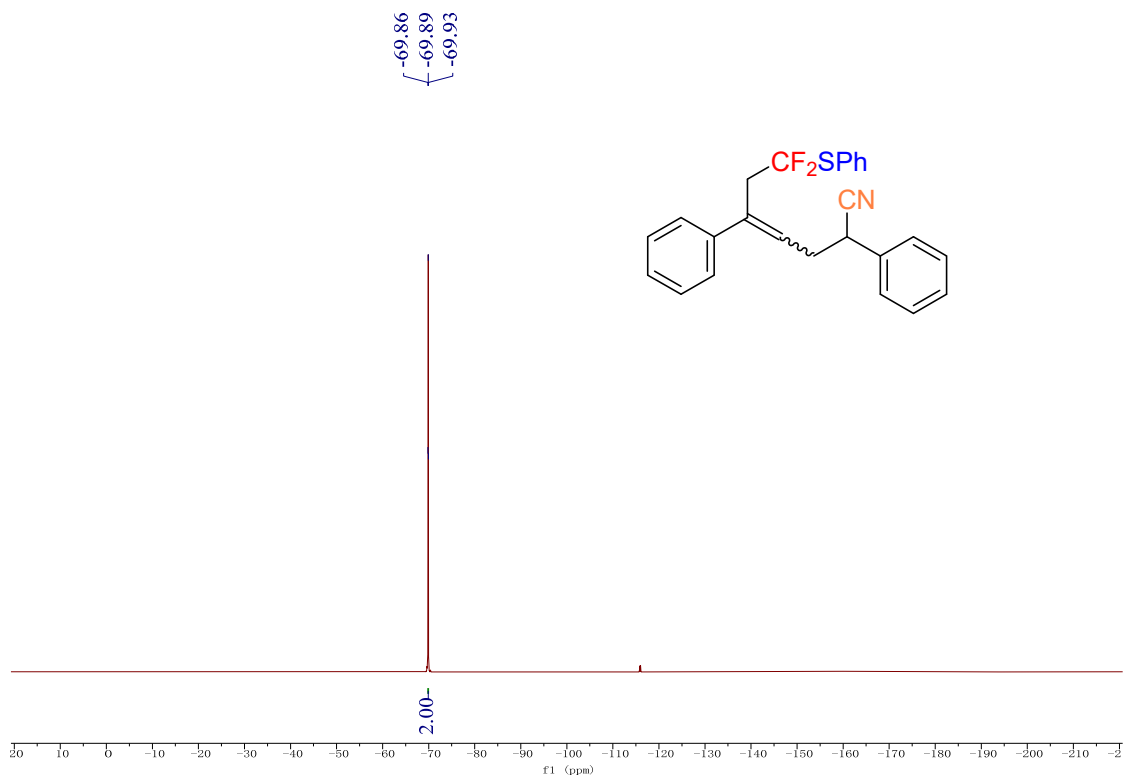

**$^1\text{H}$  NMR (400 MHz,  $\text{CDCl}_3$ )**

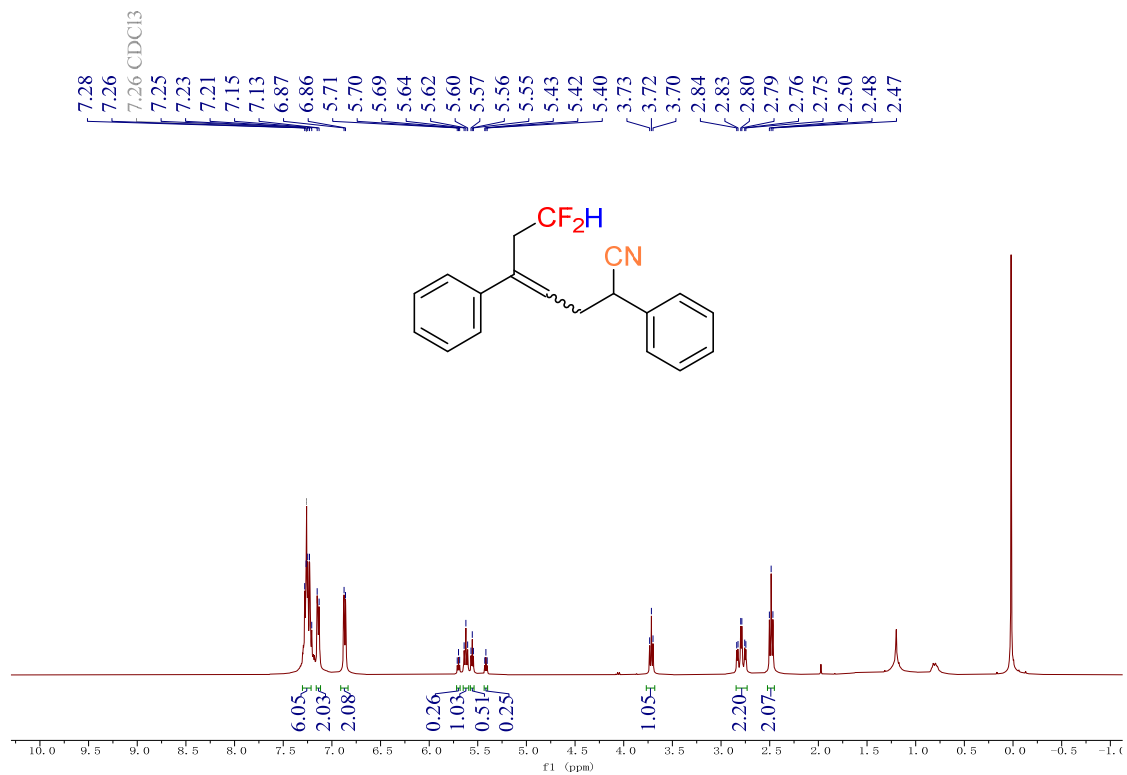



**$^{13}\text{C}$  NMR (101 MHz,  $\text{CDCl}_3$ )**

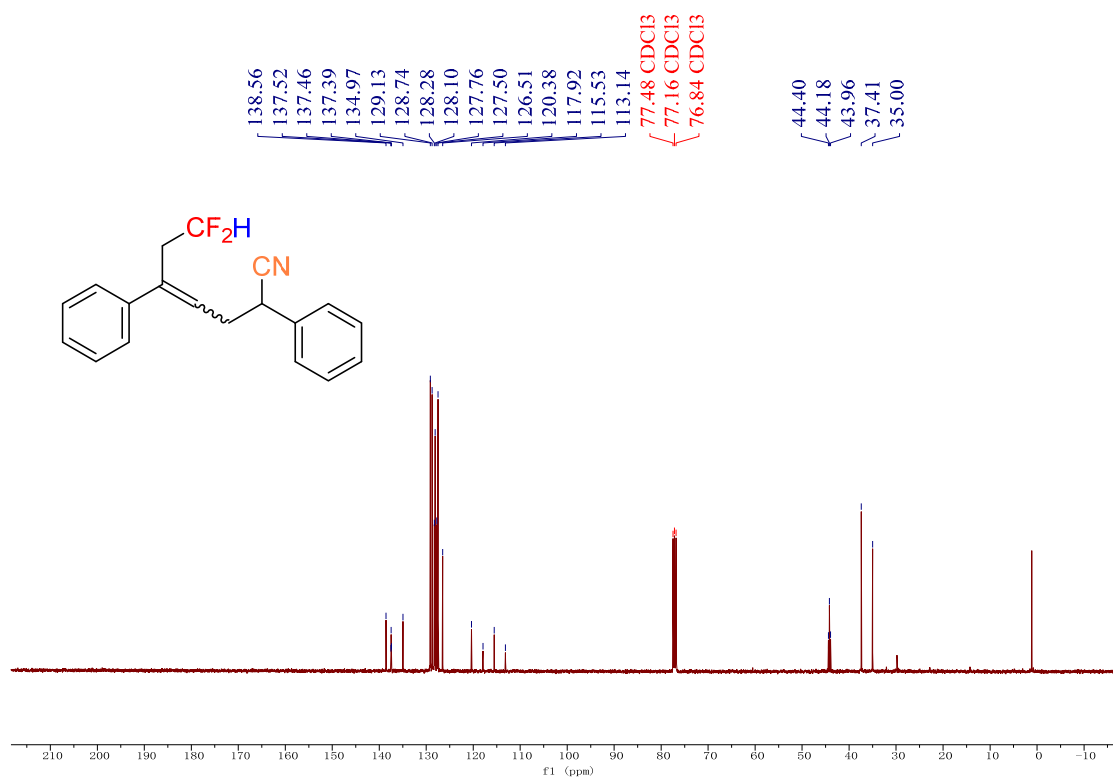

**$^{19}\text{F}$  NMR (376 MHz,  $\text{CDCl}_3$ )**

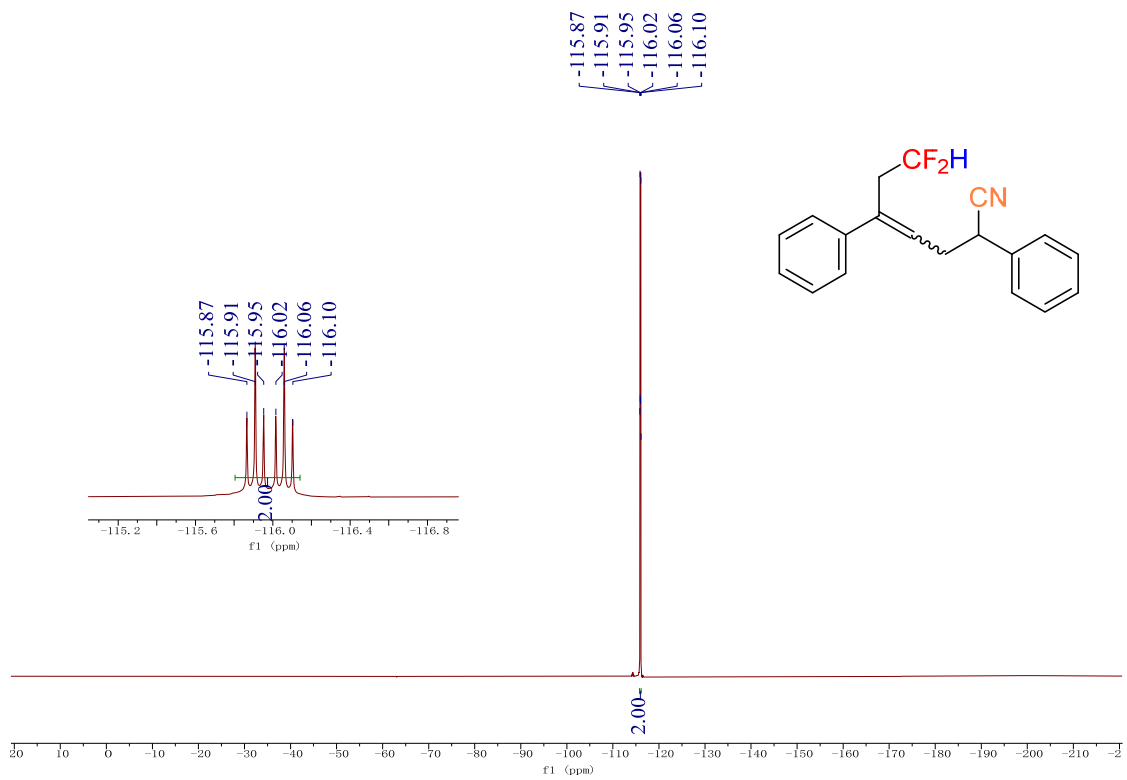

Supplement: d4ob00602j1.pdf [file d4ob00602j1.pdf]
